# Supplementary material for: Rapid Mining of Novel α-Glucosidase and Lipase Inhibitors from Streptomyces sp. HO1518 Using UPLC-QTOF-MS/MS
Source: MDPI journal article supplement (doi:10.3390/md20030189), 2022-03-04
Supplement: s1 [file s1]

# Supplementary Information

## **Rapid Mining of Novel $\alpha$ -Glucosidase and Lipase Inhibitors from *Streptomyces* sp. HO1518 Using UPLC-QTOF-MS/MS**

**Jianlin Xu <sup>1,2,3,†</sup>, Zhifeng Liu <sup>2,3,†</sup>, Zhanguang Feng <sup>2,3</sup>, Yuhong Ren <sup>1</sup>, Haili Liu <sup>2,\*</sup> and Yong Wang <sup>1,2,\*</sup>**

<sup>1</sup>*State Key Laboratory of Bioreactor Engineering, East China University of Science and Technology, Shanghai 200237, China*

<sup>2</sup>*CAS-Key Laboratory of Synthetic Biology, CAS Center for Excellence in Molecular Plant Sciences, Institute of Plant Physiology and Ecology, Chinese Academy of Sciences, Shanghai 200032, China*

<sup>3</sup>*University of Chinese Academy of Sciences, Beijing 100039, China*

\*Corresponding authors. Tel./fax: +86 21 54924295.

E-mail addresses: yongwang@cemps.ac.cn (Yong Wang); hlliu@cemps.ac.cn (Haili Liu).

† These authors contributed equally to this work.

## Table of Contents

|                                                                                                                                                                                                                                                                                                                                            |    |
|--------------------------------------------------------------------------------------------------------------------------------------------------------------------------------------------------------------------------------------------------------------------------------------------------------------------------------------------|----|
| <b>Table S1</b> $^1\text{H}$ (500 MHz) and $^{13}\text{C}$ (125 MHz) NMR data of <b>10–13</b> ( $\delta$ ppm) in $\text{D}_2\text{O}$ .....                                                                                                                                                                                                | 8  |
| <b>Table S2</b> $^1\text{H}$ (500 MHz) and $^{13}\text{C}$ (125 MHz) NMR data of <b>14–16</b> ( $\delta$ ppm) in $\text{D}_2\text{O}$ . ....                                                                                                                                                                                               | 10 |
| <b>Table S3</b> $^1\text{H}$ (500 MHz) and $^{13}\text{C}$ (125 MHz) NMR data of <b>10</b> ( $\delta$ ppm) in $\text{D}_2\text{O}$ .....                                                                                                                                                                                                   | 12 |
| <b>Table S4</b> $^1\text{H}$ (500 MHz) and $^{13}\text{C}$ (125 MHz) NMR data of <b>11</b> ( $\delta$ ppm) in $\text{D}_2\text{O}$ .....                                                                                                                                                                                                   | 14 |
| <b>Table S5</b> $^1\text{H}$ (500 MHz) and $^{13}\text{C}$ (125 MHz) NMR data of <b>12</b> ( $\delta$ ppm) in $\text{D}_2\text{O}$ .....                                                                                                                                                                                                   | 16 |
| <b>Table S6</b> $^1\text{H}$ (500 MHz) and $^{13}\text{C}$ (125 MHz) NMR data of <b>13</b> ( $\delta$ ppm) in $\text{D}_2\text{O}$ .....                                                                                                                                                                                                   | 18 |
| <b>Table S7</b> $^1\text{H}$ (500 MHz) and $^{13}\text{C}$ (125 MHz) NMR data of <b>14</b> ( $\delta$ ppm) in $\text{D}_2\text{O}$ .....                                                                                                                                                                                                   | 20 |
| <b>Table S8</b> $^1\text{H}$ (500 MHz) and $^{13}\text{C}$ (125 MHz) NMR data of <b>15</b> ( $\delta$ ppm) in $\text{D}_2\text{O}$ .....                                                                                                                                                                                                   | 22 |
| <b>Table S9</b> $^1\text{H}$ (500 MHz) and $^{13}\text{C}$ (125 MHz) NMR data of <b>16</b> ( $\delta$ ppm) in $\text{D}_2\text{O}$ .....                                                                                                                                                                                                   | 24 |
| <b>Table S10</b> Acarviostatins with glucose(s) at the reducing terminus (Aca-glu) from <i>Streptomyces</i> sp. HO1518. ....                                                                                                                                                                                                               | 26 |
| <b>Table S11</b> Acarviostatins with glucose(s) at the reducing and nonreducing terminus (glu-Aca-glu) from <i>Streptomyces</i> sp. HO1518 <sup>a</sup> .....                                                                                                                                                                              | 28 |
| <b>Table S12</b> Acarviostatins with an incomplete pseudo-trisaccharide at the nonreducing terminus (incAca-glu) from <i>Streptomyces</i> sp. HO1518 <sup>a</sup> . ....                                                                                                                                                                   | 29 |
| <b>Figure S1</b> HRESI-MS/MS spectra of compounds <b>1–9</b> .....                                                                                                                                                                                                                                                                         | 31 |
| <b>Figure S2.</b> Positive HRESIMS/MS fragmentation and spectra of <b>9</b> and <b>14–16</b> . (A) Positive-ion HRESIMS/MS fragmentation patterns of <b>9</b> and <b>14–16</b> ; (B–E) HRESIMS/MS spectra of <b>9</b> and <b>14–16</b> .....                                                                                               | 32 |
| <b>Figure S3</b> The inhibitory activities of <b>10–16</b> against three digestive enzymes. (A) The inhibitory activities of <b>10–16</b> against PPA. (B) The inhibitory activities of <b>10–16</b> against sucrase. (C) The inhibitory activities of <b>10–16</b> against PL. ....                                                       | 33 |
| <b>Figure S4</b> HRESI-MS/MS spectra of compounds <b>17–20</b> .....                                                                                                                                                                                                                                                                       | 34 |
| <b>Figure S5</b> The total ion chromatograms of fraction 1 and 2 derived from <i>Streptomyces</i> sp. HO1518. ....                                                                                                                                                                                                                         | 34 |
| <b>Figure S6</b> The EIC of acarviostatins with glucose at the reducing terminus from <i>Streptomyces</i> sp. HO1518.....                                                                                                                                                                                                                  | 36 |
| <b>Figure S7</b> The EIC of acarviostatins with glucose at the reducing and nonreducing terminus from <i>Streptomyces</i> sp. HO1518.....                                                                                                                                                                                                  | 36 |
| <b>Figure S8</b> The EIC of acarviostatins with an incomplete <i>pseudo</i> -tetrasaccharide at the nonreducing terminus from <i>Streptomyces</i> sp. HO1518.....                                                                                                                                                                          | 37 |
| <b>Figure S9</b> Positive HRESIMS/MS fragmentation and spectra of Ac-Aca I12 and Ac-Aca I03. (A) Positive-ion HRESIMS/MS fragmentation patterns of Ac-Aca I12 and Ac-Aca I03; (B) The extracted ion chromatogram of aminooligosaccharides at $m/z$ 1012; (C) HRESIMS/MS spectrum of Ac-Aca I12; (D) HRESIMS/MS spectrum of Ac-Aca I03..... | 38 |
| <b>Figure S10</b> $^1\text{H}$ NMR spectrum of compound <b>10</b> (500 MHz, $\text{D}_2\text{O}$ ).....                                                                                                                                                                                                                                    | 39 |
| <b>Figure S11</b> 1D-selective TOCSY spectrum of compound <b>10</b> (500 MHz, $\text{D}_2\text{O}$ , excitation at $\delta$ 5.23, H-A1 $\alpha$ ). ....                                                                                                                                                                                    | 40 |
| <b>Figure S12</b> 1D-selective TOCSY spectrum of compound <b>10</b> (500 MHz, $\text{D}_2\text{O}$ , excitation at $\delta$ 4.65, H-A1 $\beta$ ).....                                                                                                                                                                                      | 41 |
| <b>Figure S13</b> 1D-selective TOCSY spectrum of compound <b>10</b> (500 MHz, $\text{D}_2\text{O}$ , excitation at $\delta$ 5.41, H-B1, and H-C1). ....                                                                                                                                                                                    | 42 |

|                                                                                                                                                    |    |
|----------------------------------------------------------------------------------------------------------------------------------------------------|----|
| <b>Figure S14</b> 1D-selective TOCSY spectrum of compound <b>10</b> (500 MHz, D <sub>2</sub> O, excitation at $\delta$ 4.22, H-C6).....            | 43 |
| <b>Figure S15</b> 1D-selective TOCSY spectrum of compound <b>10</b> (500 MHz, D <sub>2</sub> O, excitation at $\delta$ 5.33, H-D1 and H-G1). ..... | 44 |
| <b>Figure S16</b> 1D-selective TOCSY spectrum of compound <b>10</b> (500 MHz, D <sub>2</sub> O, excitation at $\delta$ 5.98, H-E7).....            | 45 |
| <b>Figure S17</b> 1D-selective TOCSY spectrum of compound <b>10</b> (500 MHz, D <sub>2</sub> O, excitation at $\delta$ 5.38, H-F1).....            | 46 |
| <b>Figure S18</b> 1D-selective TOCSY spectrum of compound <b>10</b> (500 MHz, D <sub>2</sub> O, excitation at $\delta$ 5.90, H-H7). .....          | 47 |
| <b>Figure S19</b> <sup>13</sup> C NMR spectrum of compound <b>10</b> (125 MHz, D <sub>2</sub> O).....                                              | 48 |
| <b>Figure S20</b> DEPT-135 spectrum of compound <b>10</b> (125 MHz, D <sub>2</sub> O).....                                                         | 49 |
| <b>Figure S21</b> HSQC spectrum of compound <b>10</b> (500 MHz, D <sub>2</sub> O). .....                                                           | 50 |
| <b>Figure S22</b> <sup>1</sup> H- <sup>1</sup> H COSY spectrum of compound <b>10</b> (500 MHz, D <sub>2</sub> O).....                              | 51 |
| <b>Figure S23</b> 2D-TOCSY spectrum of compound <b>10</b> (500 MHz, D <sub>2</sub> O).....                                                         | 52 |
| <b>Figure S24</b> HSQC-TOCSY spectrum of compound <b>10</b> (500 MHz, D <sub>2</sub> O).....                                                       | 53 |
| <b>Figure S25</b> HMBC spectrum of compound <b>10</b> (500 MHz, D <sub>2</sub> O). .....                                                           | 54 |
| <b>Figure S26</b> NOESY spectrum of compound <b>10</b> (500 MHz, D <sub>2</sub> O).....                                                            | 55 |
| <b>Figure S27</b> HRESIMS spectrum of compound <b>10</b> . .....                                                                                   | 56 |
| <b>Figure S28</b> UV spectrum of compound <b>10</b> . .....                                                                                        | 56 |
| <b>Figure S29</b> IR spectrum of compound <b>10</b> .....                                                                                          | 57 |
| <b>Figure S30</b> <sup>1</sup> H NMR spectrum of compound <b>11</b> (500 MHz, D <sub>2</sub> O).....                                               | 58 |
| <b>Figure S31</b> 1D-selective TOCSY spectrum of compound <b>11</b> (500 MHz, D <sub>2</sub> O, excitation at $\delta$ 4.66, H-A1 $\beta$ ).....   | 59 |
| <b>Figure S32</b> 1D-selective TOCSY spectrum of compound <b>11</b> (500 MHz, D <sub>2</sub> O, excitation at $\delta$ 5.41, H-B1 and H-C1). ..... | 60 |
| <b>Figure S33</b> 1D-selective TOCSY spectrum of compound <b>11</b> (500 MHz, D <sub>2</sub> O, excitation at $\delta$ 4.44, H-C6a).....           | 61 |
| <b>Figure S34</b> 1D-selective TOCSY spectrum of compound <b>11</b> (500 MHz, D <sub>2</sub> O, excitation at $\delta$ 5.29, H-D1).....            | 62 |
| <b>Figure S35</b> 1D-selective TOCSY spectrum of compound <b>11</b> (500 MHz, D <sub>2</sub> O, excitation at $\delta$ 5.98, H-E7).....            | 63 |
| <b>Figure S36</b> 1D-selective TOCSY spectrum of compound <b>11</b> (500 MHz, D <sub>2</sub> O, excitation at $\delta$ 5.38, H-F1).....            | 64 |
| <b>Figure S37</b> 1D-selective TOCSY spectrum of compound <b>11</b> (500 MHz, D <sub>2</sub> O, excitation at $\delta$ 5.32, H-G1). .....          | 65 |
| <b>Figure S38</b> 1D-selective TOCSY spectrum of compound <b>11</b> (500 MHz, D <sub>2</sub> O, excitation at $\delta$ 5.90, H-H7). .....          | 66 |
| <b>Figure S39</b> <sup>13</sup> C NMR spectrum of compound <b>11</b> (125 MHz, D <sub>2</sub> O).....                                              | 67 |
| <b>Figure S40</b> DEPT-135 spectrum of compound <b>11</b> (125 MHz, D <sub>2</sub> O).....                                                         | 68 |
| <b>Figure S41</b> HSQC spectrum of compound <b>11</b> (500 MHz, D <sub>2</sub> O). .....                                                           | 69 |
| <b>Figure S42</b> <sup>1</sup> H- <sup>1</sup> H COSY spectrum of compound <b>11</b> (500 MHz, D <sub>2</sub> O).....                              | 70 |
| <b>Figure S43</b> 2D-TOCSY spectrum of compound <b>11</b> (500 MHz, D <sub>2</sub> O).....                                                         | 71 |
| <b>Figure S44</b> HSQC-TOCSY spectrum of compound <b>11</b> (500 MHz, D <sub>2</sub> O).....                                                       | 72 |

|                                                                                                                                               |     |
|-----------------------------------------------------------------------------------------------------------------------------------------------|-----|
| <b>Figure S45</b> HMBC spectrum of compound <b>11</b> (500 MHz, D <sub>2</sub> O).                                                            | 73  |
| <b>Figure S46</b> NOESY spectrum of compound <b>11</b> (500 MHz, D <sub>2</sub> O).                                                           | 74  |
| <b>Figure S47</b> HRESIMS spectrum of compound <b>11</b> .                                                                                    | 75  |
| <b>Figure S48</b> UV spectrum of compound <b>11</b> .                                                                                         | 75  |
| <b>Figure S49</b> IR spectrum of compound <b>11</b> .                                                                                         | 76  |
| <b>Figure S50</b> <sup>1</sup> H NMR spectrum of compound <b>12</b> (500 MHz, D <sub>2</sub> O).                                              | 77  |
| <b>Figure S51</b> 1D-selective TOCSY spectrum of compound <b>12</b> (500 MHz, D <sub>2</sub> O, excitation at $\delta$ 5.24, H-A1 $\alpha$ ). | 78  |
| <b>Figure S52</b> 1D-selective TOCSY spectrum of compound <b>12</b> (500 MHz, D <sub>2</sub> O, excitation at $\delta$ 4.66, H-A1 $\beta$ ).  | 79  |
| <b>Figure S53</b> 1D-selective TOCSY spectrum of compound <b>12</b> (500 MHz, D <sub>2</sub> O, excitation at $\delta$ 5.38, H-B1 and H-C1).  | 80  |
| <b>Figure S54</b> 1D-selective TOCSY spectrum of compound <b>12</b> (500 MHz, D <sub>2</sub> O, excitation at $\delta$ 4.44, H-C6a).          | 81  |
| <b>Figure S55</b> 1D-selective TOCSY spectrum of compound <b>12</b> (500 MHz, D <sub>2</sub> O, excitation at $\delta$ 5.28, H-D1).           | 82  |
| <b>Figure S56</b> 1D-selective TOCSY spectrum of compound <b>12</b> (500 MHz, D <sub>2</sub> O, excitation at $\delta$ 5.98, H-E1).           | 83  |
| <b>Figure S57</b> 1D-selective TOCSY spectrum of compound <b>12</b> (500 MHz, D <sub>2</sub> O, excitation at $\delta$ 5.42, H-F1).           | 84  |
| <b>Figure S58</b> 1D-selective TOCSY spectrum of compound <b>12</b> (500 MHz, D <sub>2</sub> O, excitation at $\delta$ 5.33, H-G1).           | 85  |
| <b>Figure S59</b> 1D-selective TOCSY spectrum of compound <b>12</b> (500 MHz, D <sub>2</sub> O, excitation at $\delta$ 5.91, H-H1).           | 86  |
| <b>Figure S60</b> <sup>13</sup> C NMR spectrum of compound <b>12</b> (125 MHz, D <sub>2</sub> O).                                             | 87  |
| <b>Figure S61</b> DEPT-135 spectrum of compound <b>12</b> (125 MHz, D <sub>2</sub> O).                                                        | 88  |
| <b>Figure S62</b> HSQC spectrum of compound <b>12</b> (500 MHz, D <sub>2</sub> O).                                                            | 89  |
| <b>Figure S63</b> <sup>1</sup> H- <sup>1</sup> H COSY spectrum of compound <b>12</b> (500 MHz, D <sub>2</sub> O).                             | 90  |
| <b>Figure S64</b> 2D-TOCSY spectrum of compound <b>12</b> (500 MHz, D <sub>2</sub> O).                                                        | 91  |
| <b>Figure S65</b> HSQC-TOCSY spectrum of compound <b>12</b> (500 MHz, D <sub>2</sub> O).                                                      | 92  |
| <b>Figure S66</b> HMBC spectrum of compound <b>12</b> (500 MHz, D <sub>2</sub> O).                                                            | 93  |
| <b>Figure S67</b> NOESY spectrum of compound <b>12</b> (500 MHz, D <sub>2</sub> O).                                                           | 94  |
| <b>Figure S68</b> HRESIMS spectrum of compound <b>12</b> .                                                                                    | 95  |
| <b>Figure S69</b> UV spectrum of compound <b>12</b> .                                                                                         | 95  |
| <b>Figure S70</b> IR spectrum of compound <b>12</b> .                                                                                         | 96  |
| <b>Figure S71</b> <sup>1</sup> H NMR spectrum of compound <b>13</b> (500 MHz, D <sub>2</sub> O).                                              | 97  |
| <b>Figure S72</b> 1D-selective TOCSY spectrum of compound <b>13</b> (500 MHz, D <sub>2</sub> O, excitation at $\delta$ 5.24, H-A1 $\alpha$ ). | 98  |
| <b>Figure S73</b> 1D-selective TOCSY spectrum of compound <b>13</b> (500 MHz, D <sub>2</sub> O, excitation at $\delta$ 4.66, H-A1 $\beta$ ).  | 99  |
| <b>Figure S74</b> 1D-selective TOCSY spectrum of compound <b>13</b> (500 MHz, D <sub>2</sub> O, excitation at $\delta$ 5.41, H-B1 and H-C1).  | 100 |
| <b>Figure S75</b> 1D-selective TOCSY spectrum of compound <b>13</b> (500 MHz, D <sub>2</sub> O, excitation at $\delta$ 4.49, H-C6).           | 101 |



|                                                                                                                                                         |     |
|---------------------------------------------------------------------------------------------------------------------------------------------------------|-----|
| <b>Figure S76</b> 1D-selective TOCSY spectrum of compound <b>13</b> (500 MHz, D <sub>2</sub> O, excitation at $\delta$ 5.29, H-D1).....                 | 102 |
| <b>Figure S77</b> 1D-selective TOCSY spectrum of compound <b>13</b> (500 MHz, D <sub>2</sub> O, excitation at $\delta$ 5.99, H-E7).....                 | 103 |
| <b>Figure S78</b> 1D-selective TOCSY spectrum of compound <b>13</b> (500 MHz, D <sub>2</sub> O, excitation at $\delta$ 5.38, H-F1).....                 | 104 |
| <b>Figure S79</b> 1D-selective TOCSY spectrum of compound <b>13</b> (500 MHz, D <sub>2</sub> O, excitation at $\delta$ 5.33, H-G1). ....                | 105 |
| <b>Figure S80</b> 1D-selective TOCSY spectrum of compound <b>13</b> (500 MHz, D <sub>2</sub> O, excitation at $\delta$ 5.91, H-H7). ....                | 106 |
| <b>Figure S81</b> <sup>13</sup> C NMR spectrum of compound <b>13</b> (125 MHz, D <sub>2</sub> O).....                                                   | 107 |
| <b>Figure S82</b> DEPT-135 spectrum of compound <b>13</b> (125 MHz, D <sub>2</sub> O).....                                                              | 108 |
| <b>Figure S83</b> HSQC spectrum of compound <b>13</b> (500 MHz, D <sub>2</sub> O). ....                                                                 | 109 |
| <b>Figure S84</b> <sup>1</sup> H- <sup>1</sup> H COSY spectrum of compound <b>13</b> (500 MHz, D <sub>2</sub> O).....                                   | 110 |
| <b>Figure S85</b> 2D-TOCSY spectrum of compound <b>13</b> (500 MHz, D <sub>2</sub> O).....                                                              | 111 |
| <b>Figure S86</b> HSQC-TOCSY spectrum of compound <b>13</b> (500 MHz, D <sub>2</sub> O).....                                                            | 112 |
| <b>Figure S87</b> HMBC spectrum of compound <b>13</b> (500 MHz, D <sub>2</sub> O). ....                                                                 | 113 |
| <b>Figure S88</b> NOESY spectrum of compound <b>13</b> (500 MHz, D <sub>2</sub> O).....                                                                 | 114 |
| <b>Figure S89</b> HRESIMS spectrum of compound <b>13</b> . ....                                                                                         | 115 |
| <b>Figure S90</b> UV spectrum of compound <b>13</b> . ....                                                                                              | 115 |
| <b>Figure S91</b> IR spectrum of compound <b>13</b> .....                                                                                               | 116 |
| <b>Figure S92</b> <sup>1</sup> H NMR spectrum of compound <b>14</b> (500 MHz, D <sub>2</sub> O).....                                                    | 117 |
| <b>Figure S93</b> 1D-selective TOCSY spectrum of compound <b>14</b> (500 MHz, D <sub>2</sub> O, excitation at $\delta$ 5.20, H-A1 $\alpha$ ). ....      | 118 |
| <b>Figure S94</b> 1D-selective TOCSY spectrum of compound <b>14</b> (500 MHz, D <sub>2</sub> O, excitation at $\delta$ 4.62, H-A1 $\beta$ ).....        | 119 |
| <b>Figure S95</b> 1D-selective TOCSY spectrum of compound <b>14</b> (500 MHz, D <sub>2</sub> O, excitation at $\delta$ 5.38, H-B1, H-C1, and H-D1)..... | 120 |
| <b>Figure S96</b> 1D-selective TOCSY spectrum of compound <b>14</b> (500 MHz, D <sub>2</sub> O, excitation at $\delta$ 4.40, H-D6a).....                | 121 |
| <b>Figure S97</b> 1D-selective TOCSY spectrum of compound <b>14</b> (500 MHz, D <sub>2</sub> O, excitation at $\delta$ 5.25, H-E1).....                 | 122 |
| <b>Figure S98</b> 1D-selective TOCSY spectrum of compound <b>14</b> (500 MHz, D <sub>2</sub> O, excitation at $\delta$ 5.94, H-F7).....                 | 123 |
| <b>Figure S99</b> 1D-selective TOCSY spectrum of compound <b>14</b> (500 MHz, D <sub>2</sub> O, excitation at $\delta$ 5.34, H-G1). ....                | 124 |
| <b>Figure S100</b> 1D-selective TOCSY spectrum of compound <b>14</b> (500 MHz, D <sub>2</sub> O, excitation at $\delta$ 5.29, H-H1). ....               | 125 |
| <b>Figure S101</b> 1D-selective TOCSY spectrum of compound <b>14</b> (500 MHz, D <sub>2</sub> O, excitation at $\delta$ 5.86, H-I1).....                | 126 |
| <b>Figure S102</b> <sup>13</sup> C NMR spectrum of compound <b>14</b> (125 MHz, D <sub>2</sub> O).....                                                  | 127 |
| <b>Figure S103</b> DEPT-135 spectrum of compound <b>14</b> (125 MHz, D <sub>2</sub> O).....                                                             | 128 |
| <b>Figure S104</b> HSQC spectrum of compound <b>14</b> (500 MHz, D <sub>2</sub> O). ....                                                                | 129 |
| <b>Figure S105</b> <sup>1</sup> H- <sup>1</sup> H COSY spectrum of compound <b>14</b> (500 MHz, D <sub>2</sub> O).....                                  | 130 |

|                                                                                                                                                       |     |
|-------------------------------------------------------------------------------------------------------------------------------------------------------|-----|
| <b>Figure S106</b> 2D-TOCSY spectrum of compound <b>14</b> (500 MHz, D <sub>2</sub> O).....                                                           | 131 |
| <b>Figure S107</b> HSQC-TOCSY spectrum of compound <b>14</b> (500 MHz, D <sub>2</sub> O).....                                                         | 132 |
| <b>Figure S108</b> HMBC spectrum of compound <b>14</b> (500 MHz, D <sub>2</sub> O). ....                                                              | 133 |
| <b>Figure S109</b> NOESY spectrum of compound <b>14</b> (500 MHz, D <sub>2</sub> O).....                                                              | 134 |
| <b>Figure S110</b> HRESIMS spectrum of compound <b>14</b> . ....                                                                                      | 135 |
| <b>Figure S111</b> UV spectrum of compound <b>14</b> . ....                                                                                           | 135 |
| <b>Figure S112</b> IR spectrum of compound <b>14</b> . ....                                                                                           | 136 |
| <b>Figure S113</b> <sup>1</sup> H NMR spectrum of compound <b>15</b> (500 MHz, D <sub>2</sub> O).....                                                 | 137 |
| <b>Figure S114</b> 1D-selective TOCSY spectrum of compound <b>15</b> (500 MHz, D <sub>2</sub> O, excitation at $\delta$ 5.23, H-A1 $\alpha$ ). ....   | 138 |
| <b>Figure S115</b> 1D-selective TOCSY spectrum of compound <b>15</b> (500 MHz, D <sub>2</sub> O, excitation at $\delta$ 4.65, H-A1 $\beta$ ).....     | 139 |
| <b>Figure S116</b> 1D-selective TOCSY spectrum of compound <b>15</b> (500 MHz, D <sub>2</sub> O, excitation at $\delta$ 5.40, H-B1, C1, and D1). .... | 140 |
| <b>Figure S117</b> 1D-selective TOCSY spectrum of compound <b>15</b> (500 MHz, D <sub>2</sub> O, excitation at $\delta$ 4.45, H-D6a).....             | 141 |
| <b>Figure S118</b> 1D-selective TOCSY spectrum of compound <b>15</b> (500 MHz, D <sub>2</sub> O, excitation at $\delta$ 5.28, H-E1).....              | 142 |
| <b>Figure S119</b> 1D-selective TOCSY spectrum of compound <b>15</b> (500 MHz, D <sub>2</sub> O, excitation at $\delta$ 5.97, H-F1). ....             | 143 |
| <b>Figure S120</b> 1D-selective TOCSY spectrum of compound <b>15</b> (500 MHz, D <sub>2</sub> O, excitation at $\delta$ 5.37, H-G1). ....             | 144 |
| <b>Figure S121</b> 1D-selective TOCSY spectrum of compound <b>15</b> (500 MHz, D <sub>2</sub> O, excitation at $\delta$ 5.32, H-H1). ....             | 145 |
| <b>Figure S122</b> 1D-selective TOCSY spectrum of compound <b>15</b> (500 MHz, D <sub>2</sub> O, excitation at $\delta$ 5.90, H-I1). ....             | 146 |
| <b>Figure S123</b> <sup>13</sup> C NMR spectrum of compound <b>15</b> (125 MHz, D <sub>2</sub> O).....                                                | 147 |
| <b>Figure S124</b> DEPT-135 spectrum of compound <b>15</b> (125 MHz, D <sub>2</sub> O).....                                                           | 148 |
| <b>Figure S125</b> HSQC spectrum of compound <b>15</b> (500 MHz, D <sub>2</sub> O). ....                                                              | 149 |
| <b>Figure S126</b> <sup>1</sup> H- <sup>1</sup> H COSY spectrum of compound <b>15</b> (500 MHz, D <sub>2</sub> O).....                                | 150 |
| <b>Figure S127</b> 2D-TOCSY spectrum of compound <b>15</b> (500 MHz, D <sub>2</sub> O).....                                                           | 151 |
| <b>Figure S128</b> HSQC-TOCSY spectrum of compound <b>15</b> (500 MHz, D <sub>2</sub> O).....                                                         | 152 |
| <b>Figure S129</b> HMBC spectrum of compound <b>15</b> (500 MHz, D <sub>2</sub> O). ....                                                              | 153 |
| <b>Figure S130</b> NOESY spectrum of compound <b>15</b> (500 MHz, D <sub>2</sub> O).....                                                              | 154 |
| <b>Figure S131</b> HRESIMS spectrum of compound <b>15</b> . ....                                                                                      | 155 |
| <b>Figure S132</b> UV spectrum of compound <b>15</b> . ....                                                                                           | 155 |
| <b>Figure S133</b> IR spectrum of compound <b>15</b> . ....                                                                                           | 156 |
| <b>Figure S134</b> <sup>1</sup> H NMR spectrum of compound <b>16</b> (500 MHz, D <sub>2</sub> O).....                                                 | 157 |
| <b>Figure S135</b> 1D-selective TOCSY spectrum of compound <b>16</b> (500 MHz, D <sub>2</sub> O, excitation at $\delta$ 5.20, H-A1 $\alpha$ ). ....   | 158 |
| <b>Figure S136</b> 1D-selective TOCSY spectrum of compound <b>16</b> (500 MHz, D <sub>2</sub> O, excitation at $\delta$ 4.63, H-A1 $\beta$ ).....     | 159 |
| <b>Figure S137</b> 1D-selective TOCSY spectrum of compound <b>16</b> (500 MHz, D <sub>2</sub> O, excitation at $\delta$ 5.38, H-B1, H-C1, H-D1).....  | 160 |

|                                                                                                                                           |     |
|-------------------------------------------------------------------------------------------------------------------------------------------|-----|
| <b>Figure S138</b> 1D-selective TOCSY spectrum of compound <b>16</b> (500 MHz, D <sub>2</sub> O, excitation at $\delta$ 4.43, H-D6a)..... | 161 |
| <b>Figure S139</b> 1D-selective TOCSY spectrum of compound <b>16</b> (500 MHz, D <sub>2</sub> O, excitation at $\delta$ 5.24, H-E1).....  | 162 |
| <b>Figure S140</b> 1D-selective TOCSY spectrum of compound <b>16</b> (500 MHz, D <sub>2</sub> O, excitation at $\delta$ 5.94, H-F7).....  | 163 |
| <b>Figure S141</b> 1D-selective TOCSY spectrum of compound <b>16</b> (500 MHz, D <sub>2</sub> O, excitation at $\delta$ 5.34, H-G1). .... | 164 |
| <b>Figure S142</b> 1D-selective TOCSY spectrum of compound <b>16</b> (500 MHz, D <sub>2</sub> O, excitation at $\delta$ 5.30, H-H1). .... | 165 |
| <b>Figure S143</b> 1D-selective TOCSY spectrum of compound <b>16</b> (500 MHz, D <sub>2</sub> O, excitation at $\delta$ 5.87, H-I7).....  | 166 |
| <b>Figure S144</b> <sup>13</sup> C NMR spectrum of compound <b>16</b> (125 MHz, D <sub>2</sub> O).....                                    | 167 |
| <b>Figure S145</b> DEPT-135 spectrum of compound <b>16</b> (125 MHz, D <sub>2</sub> O).....                                               | 168 |
| <b>Figure S146</b> HSQC spectrum of compound <b>16</b> (500 MHz, D <sub>2</sub> O). ....                                                  | 169 |
| <b>Figure S147</b> <sup>1</sup> H- <sup>1</sup> H COSY spectrum of compound <b>16</b> (500 MHz, D <sub>2</sub> O).....                    | 170 |
| <b>Figure S148</b> 2D-TOCSY spectrum of compound <b>16</b> (500 MHz, D <sub>2</sub> O).....                                               | 171 |
| <b>Figure S149</b> HSQC-TOCSY spectrum of compound <b>16</b> (500 MHz, D <sub>2</sub> O).....                                             | 172 |
| <b>Figure S150</b> HMBC spectrum of compound <b>16</b> (500 MHz, D <sub>2</sub> O). ....                                                  | 173 |
| <b>Figure S151</b> NOESY spectrum of compound <b>16</b> (500 MHz, D <sub>2</sub> O).....                                                  | 174 |
| <b>Figure S152</b> HRESIMS spectrum of compound <b>16</b> . ....                                                                          | 175 |
| <b>Figure S153</b> UV spectrum of compound <b>16</b> . ....                                                                               | 175 |
| <b>Figure S154</b> IR spectrum of compound <b>16</b> .....                                                                                | 176 |

**Table S1.** <sup>1</sup>H (500 MHz) and <sup>13</sup>C (125 MHz) NMR data of **10–13** (ppm) in D<sub>2</sub>O.

| No.         | 10                    |                    | 11                    |                    | 12                    |                    | 13                    |                    |
|-------------|-----------------------|--------------------|-----------------------|--------------------|-----------------------|--------------------|-----------------------|--------------------|
|             | $\delta_C$            | $\delta_H$         | $\delta_C$            | $\delta_H$         | $\delta_C$            | $\delta_H$         | $\delta_C$            | $\delta_H$         |
| A1 $\alpha$ | 93.4, CH              | 5.23, d (3.5, 1H)  | 95.3, CH              | 5.23, d (3.5, 1H)  | 91.9, CH              | 5.24, d (3.4, 1H)  | 92.0, CH              | 5.24, d (3.5, 1H)  |
| A2 $\alpha$ | 71.2, CH              | 3.57, m (1H)       | 74.8, CH              | 3.58, m (1H)       | 71.3, CH              | 3.52, m (1H)       | 71.4, CH              | 3.51, m (1H)       |
| A3 $\alpha$ | 73.2, CH              | 4.09, m (1H)       | 76.7, CH              | 3.97, m (1H)       | 73.3, CH              | 4.16, m (1H)       | 73.4, CH              | 3.92, m (1H)       |
| A4 $\alpha$ | 76.8, CH              | 3.68, m (1H)       | 80.2, CH              | 3.65, m (1H)       | 76.8, CH              | 3.69, m (1H)       | 76.9, CH              | 3.69, m (1H)       |
| A5 $\alpha$ | 70.0, CH              | 3.97, m (1H)       | 73.3, CH              | 3.87, m (1H)       | 70.0, CH              | 3.90, m (1H)       | 70.0, CH              | 3.82, m (1H)       |
| A6 $\alpha$ | 60.5, CH <sub>2</sub> | 3.85, m (2H)       | 63.8, CH <sub>2</sub> | 3.87, m (2H)       | 60.5, CH <sub>2</sub> | 3.74, m (2H)       | 60.5, CH <sub>2</sub> | 3.79, m (2H)       |
| A1 $\beta$  | 95.8, CH              | 4.65, d (8.0, 1H)  | 99.2, CH              | 4.66, d (8.0, 1H)  | 95.8, CH              | 4.66, d (8.0, 1H)  | 95.8, CH              | 4.66, d (7.8, 1H)  |
| A2 $\beta$  | 74.0, CH              | 3.27, t (9.0, 1H)  | 77.4, CH              | 3.28, t (9.0, 1H)  | 74.0, CH              | 3.29, m (1H)       | 74.0, CH              | 3.28, m (1H)       |
| A3 $\beta$  | 76.2, CH              | 3.76, m (1H)       | 79.7, CH              | 3.77, m (1H)       | 76.3, CH              | 3.78, m (1H)       | 76.2, CH              | 3.77, m (1H)       |
| A4 $\beta$  | 76.9, CH              | 3.65, m (1H)       | 80.2, CH              | 3.66, m (1H)       | 76.8, CH              | 3.67, m (1H)       | 76.8, CH              | 3.66, m (1H)       |
| A5 $\beta$  | 74.6, CH              | 3.60, m (1H)       | 77.9, CH              | 3.62, m (1H)       | 74.6, CH              | 3.62, m (1H)       | 74.6, CH              | 3.60, m (1H)       |
| A6 $\beta$  | 60.5, CH <sub>2</sub> | 3.90, m (2H)       | 64.1, CH <sub>2</sub> | 3.91, m (2H)       | 60.6, CH <sub>2</sub> | 3.92, m (2H)       | 60.5, CH <sub>2</sub> | 3.90, m (2H)       |
| B1          | 99.5, CH              | 5.41, d (3.5, 1H)  | 102.8, CH             | 5.41, d (3.5, 1H)  | 99.6, CH              | 5.38, d (3.5, 1H)  | 99.4, CH              | 5.41, d (3.5, 1H)  |
| B2          | 71.5, CH              | 3.62, m (1H)       | 74.9, CH              | 3.64, m (1H)       | 71.6, CH              | 3.58, m (1H)       | 71.6, CH              | 3.62, m (1H)       |
| B3          | 73.4, CH              | 3.95, m (1H)       | 76.7, CH              | 3.96, m (1H)       | 73.4, CH              | 3.94, m (1H)       | 73.2, CH              | 3.96, m (1H)       |
| B4          | 77.0, CH              | 3.67, m (1H)       | 80.4, CH              | 3.67, m (1H)       | 77.1, CH              | 3.63, m (1H)       | 77.1, CH              | 3.64, m (1H)       |
| B5          | 71.2, CH              | 3.85, m (1H)       | 74.6, CH              | 3.85, m (1H)       | 71.2, CH              | 3.80, m (1H)       | 71.3, CH              | 3.85, m (1H)       |
| B6          | 60.7, CH <sub>2</sub> | 3.85, m (2H)       | 63.9, CH <sub>2</sub> | 3.85, m (2H)       | 60.7, CH <sub>2</sub> | 3.80, m (2H)       | 60.7, CH <sub>2</sub> | 3.85, m (2H)       |
| C1          | 99.4, CH              | 5.41, d (3.5, 1H)  | 103.0, CH             | 5.41, d (3.5, 1H)  | 99.4, CH              | 5.38, d (3.5, 1H)  | 99.6, CH              | 5.41, d (3.5, 1H)  |
| C2          | 71.0, CH              | 3.66, m (1H)       | 74.5, CH              | 3.67, m (1H)       | 71.1, CH              | 3.62, m (1H)       | 71.2, CH              | 3.62, m (1H)       |
| C3          | 73.3, CH              | 3.83, m (1H)       | 76.6, CH              | 3.95, m (1H)       | 73.2, CH              | 3.92, m (1H)       | 73.2, CH              | 3.96, m (1H)       |
| C4          | 77.0, CH              | 3.68, m (1H)       | 81.3, CH              | 3.67, m (1H)       | 78.2, CH              | 3.62, m (1H)       | 78.0, CH              | 3.64, m (1H)       |
| C5          | 69.4, CH              | 4.04, d (12.0, 1H) | 72.3, CH              | 4.05, d (12.0, 1H) | 69.0, CH              | 4.03, d (12.0, 1H) | 69.0, CH              | 4.05, d (12.0, 1H) |
| C6a         | 63.2, CH <sub>2</sub> | 4.15, m (1H)       | 63.8, CH <sub>2</sub> | 4.22, m (1H)       | 63.5, CH <sub>2</sub> | 4.20, m (1H)       | 63.4, CH <sub>2</sub> | 4.23, m (1H)       |
| C6b         |                       | 4.23, d (12.0, 1H) |                       | 4.44, d (12.0, 1H) |                       | 4.45, d (12.0, 1H) |                       | 4.49, d (12.0, 1H) |
| D1          | 99.9, CH              | 5.33, d (3.5, 1H)  | 104.0, CH             | 5.29, d (3.5, 1H)  | 100.7, CH             | 5.28, d (3.5, 1H)  | 100.6, CH             | 5.29, d (3.5, 1H)  |
| D2          | 71.2, CH              | 3.56, m (1H)       | 74.6, CH              | 3.56, m (1H)       | 71.2, CH              | 3.54, m (1H)       | 71.3, CH              | 3.58, m (1H)       |
| D3          | 72.7, CH              | 3.59, m (1H)       | 76.3, CH              | 3.59, m (1H)       | 73.0, CH              | 3.56, m (1H)       | 73.0, CH              | 3.60, m (1H)       |
| D4          | 64.2, CH              | 2.48, t (9.0, 1H)  | 67.7, CH              | 2.48, t (9.0, 1H)  | 64.3, CH              | 2.47, t (8.8, 1H)  | 64.3, CH              | 2.47, t (9.0, 1H)  |
| D5          | 69.7, CH              | 3.76, m (1H)       | 73.2, CH              | 3.73, m (1H)       | 69.8, CH              | 3.71, m (1H)       | 69.8, CH              | 3.75, m (1H)       |
| D6          | 17.4, CH <sub>3</sub> | 1.34, d (5.7, 3H)  | 20.7, CH <sub>3</sub> | 1.30, d (5.7, 3H)  | 17.4, CH <sub>3</sub> | 1.31, d (5.6, 3H)  | 17.4, CH <sub>3</sub> | 1.32, d (5.6, 3H)  |
| E1          | 55.0, CH              | 3.54, m (1H)       | 58.4, CH              | 3.53, m (1H)       | 55.0, CH              | 3.53, m (1H)       | 55.0, CH              | 3.48, m (1H)       |
| E2          | 70.7, CH              | 3.82, m (1H)       | 73.0, CH              | 3.80, m (1H)       | 70.8, CH              | 3.80, m (1H)       | 69.7, CH              | 3.79, m (1H)       |
| E3          | 70.8, CH              | 4.13, m (1H)       | 74.1, CH              | 4.13, m (1H)       | 70.9, CH              | 4.14, m (1H)       | 70.8, CH              | 4.14, m (1H)       |
| E4          | 76.1, CH              | 4.22, m (1H)       | 79.6, CH              | 4.22, m (1H)       | 76.2, CH              | 4.23, m (1H)       | 76.4, CH              | 4.23, m (1H)       |
| E5          | 136.5, C              |                    | 139.9, C              |                    | 136.5, C              |                    | 136.5, C              |                    |
| E6a         | 62.0, CH <sub>2</sub> | 4.13, m (1H)       | 65.4, CH <sub>2</sub> | 4.13, m (1H)       | 62.0, CH <sub>2</sub> | 4.14, m (1H)       | 62.0, CH <sub>2</sub> | 4.14, m (1H)       |
| E6b         |                       | 4.22, m (1H)       |                       | 4.22, m (1H)       |                       | 4.23, m (1H)       |                       | 4.23, m (1H)       |

|     |                       |                    |                       |                    |                       |                    |                       |                    |
|-----|-----------------------|--------------------|-----------------------|--------------------|-----------------------|--------------------|-----------------------|--------------------|
| E7  | 126.3, CH             | 5.98, d (3.2, 1H)  | 129.7, CH             | 5.98, d (3.2, 1H)  | 126.3, CH             | 5.98, d (3.1, 1H)  | 126.4, CH             | 5.99, d (3.2, 1H)  |
| F1  | 97.5, CH              | 5.38, d (3.4, 1H)  | 101.0, CH             | 5.38, d (3.4, 1H)  | 97.8, CH              | 5.42, d (3.5, 1H)  | 97.6, CH              | 5.38, d (3.5, 1H)  |
| F2  | 72.9, CH              | 3.58, m (1H)       | 74.9, CH              | 3.62, m (1H)       | 73.2, CH              | 3.68, m (1H)       | 72.7, CH              | 3.61, m (1H)       |
| F3  | 73.5, CH              | 3.93, m (1H)       | 76.9, CH              | 3.93, m (1H)       | 73.5, CH              | 3.94, m (1H)       | 73.5, CH              | 3.93, m (1H)       |
| F4  | 70.8, CH              | 3.60, m (1H)       | 74.2, CH              | 3.64, m (1H)       | 70.9, CH              | 3.66, m (1H)       | 70.9, CH              | 3.61, m (1H)       |
| F5  | 71.1, CH              | 3.95, m (1H)       | 74.5, CH              | 3.93, m (1H)       | 71.2, CH              | 3.96, m (1H)       | 71.2, CH              | 3.93, m (1H)       |
| F6  | 60.4, CH <sub>2</sub> | 3.81, m (2H)       | 66.9, CH <sub>2</sub> | 3.81, m (2H)       | 60.4, CH <sub>2</sub> | 3.82, m (2H)       | 60.7, CH <sub>2</sub> | 3.82, m (2H)       |
| G1  | 99.6, CH              | 5.33, d (3.4, 1H)  | 103.3, CH             | 5.32, d (3.4, 1H)  | 99.9, CH              | 5.33, d (3.4, 1H)  | 100.0, CH             | 5.33, d (3.4, 1H)  |
| G2  | 71.3, CH              | 3.56, m (1H)       | 74.7, CH              | 3.58, m (1H)       | 71.2, CH              | 3.61, m (1H)       | 71.5, CH              | 3.58, m (1H)       |
| G3  | 72.2, CH              | 3.59, m (1H)       | 75.9, CH              | 3.62, m (1H)       | 72.6, CH              | 3.61, m (1H)       | 72.6, CH              | 3.60, m (1H)       |
| G4  | 64.9, CH              | 2.48, t (9.0, 1H)  | 68.3, CH              | 2.48, t (9.0, 1H)  | 64.9, CH              | 2.47, t (8.8, 1H)  | 65.0, CH              | 2.47, t (9.0, 1H)  |
| G5  | 69.6, CH              | 3.86, m (1H)       | 73.0, CH              | 3.76, m (1H)       | 69.6, CH              | 3.77, m (1H)       | 69.6, CH              | 3.75, m (1H)       |
| G6  | 17.3, CH <sub>3</sub> | 1.34, d (5.7, 3H)  | 20.8, CH <sub>3</sub> | 1.34, d (5.7, 3H)  | 17.3, CH <sub>3</sub> | 1.35, d (5.6, 3H)  | 17.4, CH <sub>3</sub> | 1.35, d (5.6, 3H)  |
| H1  | 56.0, CH              | 3.52, m (1H)       | 59.4, CH              | 3.54, m (1H)       | 56.0, CH              | 3.54, m (1H)       | 56.0, CH              | 3.48, m (1H)       |
| H2  | 72.6, CH              | 3.72, m (1H)       | 76.1, CH              | 3.68, m (1H)       | 72.7, CH              | 3.69, m (1H)       | 72.8, CH              | 3.67, m (1H)       |
| H3  | 72.6, CH              | 3.75, m (1H)       | 76.3, CH              | 3.77, m (1H)       | 72.9, CH              | 3.77, m (1H)       | 73.0, CH              | 3.76, m (1H)       |
| H4  | 70.9, CH              | 4.07, d (12.0, 1H) | 74.3, CH              | 4.04, d (12.0, 1H) | 71.0, CH              | 4.06, d (12.0, 1H) | 71.0, CH              | 4.05, d (12.0, 1H) |
| H5  | 139.0, C              |                    | 142.3, C              |                    | 139.0, C              |                    | 139.0, C              |                    |
| H6a |                       |                    |                       | 4.12, m (1H)       |                       | 4.13, m (1H)       |                       | 4.12, m (1H)       |
| H6b | 61.6, CH <sub>2</sub> | 4.12, m (2H)       | 65.0 CH <sub>2</sub>  | 4.22, m (1H)       | 61.6, CH <sub>2</sub> | 4.25, m (1H)       | 61.6, CH <sub>2</sub> | 4.23, m (1H)       |
| H7  | 123.7, CH             | 5.90, d (3.5, 1H)  | 127.2, CH             | 5.90, d (3.5, 1H)  | 123.8, CH             | 5.91, d (3.4, 1H)  | 123.8, CH             | 5.91, d (3.4, 1H)  |
| 1'  |                       |                    | 180.8, C=O            |                    | 180.1, C=O            |                    | 176.2, C=O            |                    |
| 2'  |                       |                    | 30.6, CH <sub>2</sub> | 2.48, m (2H)       | 33.9, CH              | 2.72, m (2H)       | 42.9, CH <sub>2</sub> | 2.36, m (2H)       |
| 3'  |                       |                    | 11.7, CH <sub>3</sub> | 1.13, d (7.2, 3H)  | 18.3, CH <sub>3</sub> | 1.19, d (3.0, 3H)  | 25.5, CH              | 2.08, m (1H)       |
| 4'  |                       |                    |                       |                    | 18.2, CH <sub>3</sub> | 1.19, d (3.0, 3H)  | 21.7, CH <sub>3</sub> | 0.96, d (6.6, 3H)  |
| 5'  |                       |                    |                       |                    |                       |                    | 21.7, CH <sub>3</sub> | 0.96, d (6.6, 3H)  |

**Table S2.** <sup>1</sup>H (500 MHz) and <sup>13</sup>C (125 MHz) NMR data of **14–16** ( ppm) in D<sub>2</sub>O.

| No.         | 14                    |                    | 15                    |                          | 16                    |                    |
|-------------|-----------------------|--------------------|-----------------------|--------------------------|-----------------------|--------------------|
|             | $\delta_C$            | $\delta_H$         | $\delta_C$            | $\delta_H$               | $\delta_C$            | $\delta_H$         |
| A1 $\alpha$ | 94.7, CH              | 5.20, d (3.5, 1H)  | 91.9, CH              | 5.22, d (3.5, 1H)        | 91.9, CH              | 5.21, d (3.5, 1H)  |
| A2 $\alpha$ | 74.2, CH              | 3.53, m (1H)       | 71.4, CH              | 3.52, m (1H)             | 71.3, CH              | 3.50, m (1H)       |
| A3 $\alpha$ | 76.1, CH              | 3.93, m (1H)       | 73.3, CH              | 3.93, m (1H)             | 73.3, CH              | 3.92, m (1H)       |
| A4 $\alpha$ | 79.6, CH              | 3.61, m (1H)       | 76.8, CH              | 3.62, m (1H)             | 76.8, CH              | 3.64, m (1H)       |
| A5 $\alpha$ | 72.8, CH              | 3.85, m (1H)       | 69.9, CH              | 3.85, m (1H)             | 69.9, CH              | 3.84, m (1H)       |
| A6 $\alpha$ | 63.2, CH <sub>2</sub> | 3.78, m (2H)       | 60.4, CH <sub>2</sub> | 3.79, m (2H)             | 60.4, CH <sub>2</sub> | 3.78, m (2H)       |
| A1 $\beta$  | 98.6, CH              | 4.62, d (8.0, 1H)  | 95.8, CH              | 4.65, d (8.0, 1H)        | 95.8, CH              | 4.63, d (8.0, 1H)  |
| A2 $\beta$  | 76.8, CH              | 3.24, t (9.0, 1H)  | 74.0, CH              | 3.27, m (1H)             | 74.0, CH              | 3.25, m (1H)       |
| A3 $\beta$  | 79.1, CH              | 3.74, m (1H)       | 76.3, CH              | 3.77, m (1H)             | 76.2, CH              | 3.73, m (1H)       |
| A4 $\beta$  | 79.7, CH              | 3.63, m (1H)       | 76.8, CH              | 3.65, m (1H)             | 76.8, CH              | 3.64, m (1H)       |
| A5 $\beta$  | 77.4, CH              | 3.61, m (1H)       | 74.5, CH              | 3.60, m (1H)             | 74.5, CH              | 3.61, m (1H)       |
| A6 $\beta$  | 63.3, CH <sub>2</sub> | 3.88, m (2H)       | 60.5, CH <sub>2</sub> | 3.89, m (2H)             | 60.4, CH <sub>2</sub> | 3.88, m (2H)       |
| B1          | 102.2, CH             | 5.38, d (3.5, 1H)  | 99.4, CH              | 5.40, d (3.5, 1H)        | 99.4, CH              | 5.38, d (3.5, 1H)  |
| B2          | 74.4, CH              | 3.61, m (1H)       | 71.5, CH              | 3.60, m (1H)             | 71.6, CH              | 3.59, m (1H)       |
| B3          | 76.2, CH              | 3.93, m (1H)       | 73.3, CH              | 3.95, m (1H)             | 73.2, CH              | 3.94, m (1H)       |
| B4          | 79.9, CH              | 3.63, m (1H)       | 77.0, CH              | 3.64, m (1H)             | 77.0, CH              | 3.64, m (1H)       |
| B5          | 74.0, CH              | 3.82, m (1H)       | 71.2, CH              | 3.82, m (1H)             | 71.2, CH              | 3.82, m (1H)       |
| B6          | 63.4, CH <sub>2</sub> | 3.82, m (2H)       | 60.7, CH <sub>2</sub> | 3.84, m (2H)             | 60.5, CH <sub>2</sub> | 3.82, m (2H)       |
| C1          | 102.3, CH             | 5.38, d (3.5, 1H)  | 99.5, CH              | 5.40, d (3.5, 1H)        | 99.5, CH              | 5.38, d (3.5, 1H)  |
| C2          | 74.3, CH              | 3.61, m (1H)       | 71.5, CH              | 3.60, m (1H)             | 71.5, CH              | 3.59, m (1H)       |
| C3          | 76.1, CH              | 3.93, m (1H)       | 73.2, CH              | 3.95, m (1H)             | 73.3, CH              | 3.94, m (1H)       |
| C4          | 79.9, CH              | 3.63, m (1H)       | 77.0, CH              | 3.64, m (1H)             | 76.9, CH              | 3.64, m (1H)       |
| C5          | 74.1, CH              | 3.82, m (1H)       | 71.2, CH              | 3.82, m (1H)             | 71.2, CH              | 3.82, m (1H)       |
| C6          | 63.5, CH <sub>2</sub> | 3.82, m (2H)       | 60.8, CH <sub>2</sub> | 3.84, m (2H)             | 60.7, CH <sub>2</sub> | 3.82, m (2H)       |
| D1          | 102.4, CH             | 5.38, d (3.5, 1H)  | 99.6, CH              | 5.40, d (3.5, 1H)        | 99.6, CH              | 5.38, d (3.5, 1H)  |
| D2          | 73.9, CH              | 3.63, m (1H)       | 71.1, CH              | 3.63, m (1H)             | 71.1, CH              | 3.64, m (1H)       |
| D3          | 76.0, CH              | 3.93, m (1H)       | 73.2, CH              | 3.94, m (1H)             | 73.1, CH              | 3.93, m (1H)       |
| D4          | 80.7, CH              | 3.63, m (1H)       | 77.9, CH              | 3.63, m (1H)             | 78.4, CH              | 3.64, m (1H)       |
| D5          | 71.7, CH              | 4.01, d (12.0, 1H) | 68.9, CH              | 4.04, d (12.0, 1H)       | 69.0, CH              | 4.01, d (12.0, 1H) |
| D6a         | 67.1, CH <sub>2</sub> | 4.19, m (1H)       | 64.3, CH <sub>2</sub> | 4.22, m (1H)             | 63.4, CH <sub>2</sub> | 4.19, m (1H)       |
| D6b         |                       | 4.44, d (12.0, 1H) |                       | 4.45, dd (12.0, 3.0, 1H) |                       | 4.43, d (12.0, 1H) |
| E1          | 103.4, CH             | 5.25, d (3.5, 1H)  | 100.5, CH             | 5.28, d (3.4, 1H)        | 100.7, CH             | 5.24, d (3.5, 1H)  |
| E2          | 74.1, CH              | 3.57, m (1H)       | 71.3, CH              | 3.53, m (1H)             | 71.3, CH              | 3.50, m (1H)       |
| E3          | 75.8, CH              | 3.61, m (1H)       | 72.9, CH              | 3.58, m (1H)             | 72.9, CH              | 3.52, m (1H)       |
| E4          | 67.8, CH              | 2.43, t (9.0, 1H)  | 64.9, CH              | 2.45, t (9.0, 1H)        | 64.3, CH              | 2.43, t (9.0, 1H)  |
| E5          | 72.6, CH              | 3.73, m (1H)       | 69.8, CH              | 3.73, m (1H)             | 69.7, CH              | 3.71, m (1H)       |
| E6          | 20.2, CH <sub>3</sub> | 1.27, d (5.6, 3H)  | 17.4, CH <sub>3</sub> | 1.30, d (6.0, 3H)        | 17.4, CH <sub>3</sub> | 1.29, d (5.6, 3H)  |
| F1          | 57.8, CH              | 3.49, m (1H)       | 55.0, CH              | 3.53, m (1H)             | 55.0, CH              | 3.45, m (1H)       |

|     |                       |                    |                       |                    |                       |                    |
|-----|-----------------------|--------------------|-----------------------|--------------------|-----------------------|--------------------|
| F2  | 72.5, CH              | 3.77, m (1H)       | 69.7, CH              | 3.79, m (1H)       | 69.7, CH              | 3.76, m (1H)       |
| F3  | 73.6, CH              | 4.09, m (1H)       | 70.8, CH              | 4.13, m (1H)       | 70.8, CH              | 4.09, m (1H)       |
| F4  | 79.0, CH              | 4.19, m (1H)       | 76.2, CH              | 4.22, m (1H)       | 76.3, CH              | 4.19, m (1H)       |
| F5  | 139.3, C              |                    | 136.5, C              |                    | 136.5, C              |                    |
| F6a |                       | 4.09, m (1H)       |                       | 4.13, m (1H)       |                       | 4.09, m (1H)       |
| F6b | 64.8, CH <sub>2</sub> | 4.19, m (1H)       | 62.0, CH <sub>2</sub> | 4.22, m (1H)       | 62.0, CH <sub>2</sub> | 4.19, m (1H)       |
| F7  | 129.1, CH             | 5.94, d (3.2, 1H)  | 126.3, CH             | 5.97, d (3.2, 1H)  | 126.6, CH             | 5.94, d (3.1, 1H)  |
| G1  | 100.4, CH             | 5.34, d (3.4, 1H)  | 97.6, CH              | 5.37, d (3.6, 1H)  | 97.5, CH              | 5.34, d (3.5, 1H)  |
| G2  | 74.4, CH              | 3.61, m (1H)       | 71.5, CH              | 3.63, m (1H)       | 71.7, CH              | 3.58, m (1H)       |
| G3  | 76.3, CH              | 3.91, m (1H)       | 73.5, CH              | 3.92, m (1H)       | 73.5, CH              | 3.89, m (1H)       |
| G4  | 73.7, CH              | 3.61, m (1H)       | 70.8, CH              | 3.63, m (1H)       | 70.8, CH              | 3.59, m (1H)       |
| G5  | 74.0, CH              | 3.91, m (1H)       | 71.1, CH              | 3.92, m (1H)       | 71.1, CH              | 3.89, m (1H)       |
| G6  | 66.3, CH <sub>2</sub> | 3.86, m (2H)       | 63.4, CH <sub>2</sub> | 3.86, m (2H)       | 62.5, CH <sub>2</sub> | 3.83, m (2H)       |
| H1  | 102.7, CH             | 5.29, d (3.4, 1H)  | 99.9, CH              | 5.32, d (3.4, 1H)  | 99.9, CH              | 5.30, d (3.4, 1H)  |
| H2  | 74.4, CH              | 3.57, m (1H)       | 71.6, CH              | 3.61, m (1H)       | 71.5, CH              | 3.57, m (1H)       |
| H3  | 75.4, CH              | 3.61, m (1H)       | 72.5, CH              | 3.65, m (1H)       | 72.6, CH              | 3.57, m (1H)       |
| H4  | 67.8, CH              | 2.43, t (9.0, 1H)  | 64.9, CH              | 2.45, t (9.0, 1H)  | 64.9, CH              | 2.43, t (9.0, 1H)  |
| H5  | 72.4, CH              | 3.74, m (1H)       | 69.6, CH              | 3.78, m (1H)       | 69.6, CH              | 3.73, m (1H)       |
| H6  | 20.2, CH <sub>3</sub> | 1.31, d (5.6, 3H)  | 17.3, CH <sub>3</sub> | 1.34, d (6.0, 3H)  | 17.3, CH <sub>3</sub> | 1.30, d (5.6, 3H)  |
| I1  | 58.8, CH              | 3.49, m (1H)       | 56.0, CH              | 3.53, m (1H)       | 56.0, CH              | 3.45, m (1H)       |
| I2  | 75.6, CH              | 3.67, m (1H)       | 72.7, CH              | 3.66, m (1H)       | 72.7, CH              | 3.63, m (1H)       |
| I3  | 75.8, CH              | 3.77, m (1H)       | 72.9, CH              | 3.78, m (1H)       | 72.9, CH              | 3.73, m (1H)       |
| I4  | 73.8, CH              | 4.01, d (12.0, 1H) | 70.9, CH              | 4.04, d (12.0, 1H) | 70.9, CH              | 4.01, d (12.0, 1H) |
| I5  | 141.8, C              |                    | 138.9, C              |                    | 138.9, C              |                    |
| I6a |                       | 4.09, m (1H)       |                       | 4.13, m (1H)       |                       | 4.09, m (1H)       |
| I6b | 64.4, CH <sub>2</sub> | 4.19, m (1H)       | 61.6, CH <sub>2</sub> | 4.22, m (1H)       | 61.6, CH <sub>2</sub> | 4.19, m (1H)       |
| I7  | 126.6, CH             | 5.86, d (3.3, 1H)  | 123.8, CH             | 5.90, d (3.4, 1H)  | 123.8, CH             | 5.87, d (3.5, 1H)  |
| 1'  | 180.2, C=O            |                    | 176.7, C=O            |                    | 179.8, C=O            |                    |
| 2'  | 30.0, CH <sub>2</sub> | 2.43, m (2H)       | 35.6, CH <sub>2</sub> | 2.45, m (2H)       | 40.9, CH              | 2.52, m (1H)       |
| 3'  | 11.1, CH <sub>3</sub> | 1.09, d (7.0, 3H)  | 17.9, CH <sub>2</sub> | 1.18, m (1H)       | 26.4, CH <sub>2</sub> | 1.51, m (1H)       |
| 4'  |                       |                    |                       | 1.65, m (1H)       |                       | 1.63, m (1H)       |
| 5'  |                       |                    | 12.9, CH <sub>3</sub> | 0.94, t (7.2, 3H)  | 10.9, CH <sub>3</sub> | 0.88, t (7.0, 3H)  |
|     |                       |                    |                       |                    | 15.7, CH <sub>3</sub> | 1.13, d (7.0, 3H)  |

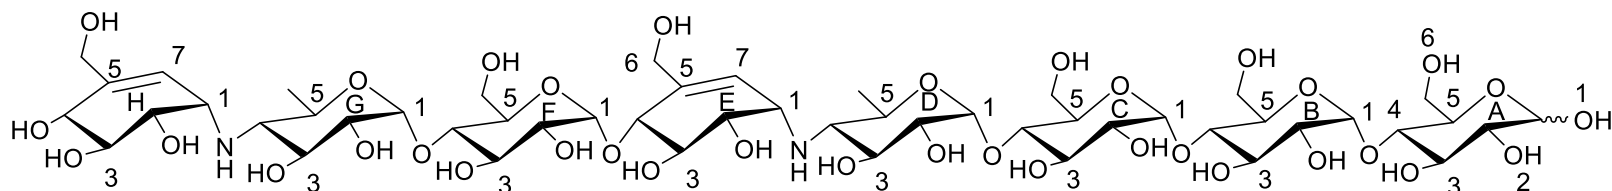

10

**Table S3.**  $^1\text{H}$  (500 MHz) and  $^{13}\text{C}$  (125 MHz) NMR data of **10** ( $\delta$  ppm) in  $\text{D}_2\text{O}$ .

| No.         | $\delta_{\text{C}}$   | $\delta_{\text{H}}$ | HMBC ( $^1\text{H} \rightarrow ^{13}\text{C}$ ) | COSY ( $^1\text{H} \rightarrow ^1\text{H}$ ) | TOCSY ( $^1\text{H} \rightarrow ^1\text{H}$ ) |
|-------------|-----------------------|---------------------|-------------------------------------------------|----------------------------------------------|-----------------------------------------------|
| A1 $\alpha$ | 93.4, CH              | 5.23, d (3.5, 1H)   | A2 $\alpha$ , A5 $\alpha$                       | A2 $\alpha$                                  | A2 $\alpha$ , A5 $\alpha$                     |
| A2 $\alpha$ | 71.2, CH              | 3.57, m (1H)        |                                                 | A1 $\alpha$ , A3 $\alpha$                    | A1 $\alpha$ , A3 $\alpha$                     |
| A3 $\alpha$ | 73.2, CH              | 4.09, m (1H)        |                                                 | A2 $\alpha$ , A4 $\alpha$                    | A2 $\alpha$ , A4 $\alpha$                     |
| A4 $\alpha$ | 76.8, CH              | 3.68, m (1H)        | B1                                              | A3 $\alpha$ , A5 $\alpha$                    | A3 $\alpha$ , A5 $\alpha$                     |
| A5 $\alpha$ | 70.0, CH              | 3.97, m (1H)        |                                                 | A4 $\alpha$ , A6 $\alpha$                    | A4 $\alpha$ , A6 $\alpha$                     |
| A6 $\alpha$ | 60.5, CH <sub>2</sub> | 3.85, m (2H)        |                                                 | A5 $\alpha$                                  | A5 $\alpha$                                   |
| A1 $\beta$  | 95.8, CH              | 4.65, d (8.0, 1H)   | A2 $\beta$ , A3 $\beta$ , A5 $\beta$            | A2 $\beta$                                   | A2 $\beta$ , A3 $\beta$ , A5 $\beta$          |
| A2 $\beta$  | 74.0, CH              | 3.27, t (9.0, 1H)   |                                                 | A1 $\beta$ , A3 $\beta$                      | A1 $\beta$ , A3 $\beta$                       |
| A3 $\beta$  | 76.2, CH              | 3.76, m (1H)        |                                                 | A2 $\beta$ , A4 $\beta$                      | A2 $\beta$ , A4 $\beta$                       |
| A4 $\beta$  | 76.9, CH              | 3.65, m (1H)        | B1                                              | A3 $\beta$                                   | A3 $\beta$ , A5 $\beta$                       |
| A5 $\beta$  | 74.6, CH              | 3.60, m (1H)        |                                                 | A4 $\beta$ , A6 $\beta$                      | A4 $\beta$ , A6 $\beta$                       |
| A6 $\beta$  | 60.5, CH <sub>2</sub> | 3.90, m (2H)        |                                                 | A5 $\beta$                                   | A5 $\beta$                                    |
| B1          | 99.5, CH              | 5.41, d (3.5, 1H)   | B2, B3                                          | B2                                           | B2, B3, B5                                    |
| B2          | 71.5, CH              | 3.62, m (1H)        |                                                 | B1, B3                                       | B1, B3                                        |
| B3          | 73.4, CH              | 3.95, m (1H)        |                                                 | B2, B4                                       | B2, B4                                        |
| B4          | 77.0, CH              | 3.67, m (1H)        | C1                                              | B3, B5                                       | B3, B5                                        |
| B5          | 71.2, CH              | 3.85, m (1H)        |                                                 | B4                                           | B4                                            |
| B6          | 60.7, CH <sub>2</sub> | 3.85, m (2H)        |                                                 | overlapped                                   | overlapped                                    |
| C1          | 99.4, CH              | 5.41, d (3.5, 1H)   | C2, C3                                          | C2                                           | C2, C3                                        |
| C2          | 71.0, CH              | 3.66, m (1H)        |                                                 | C1, C3                                       | C1, C3                                        |
| C3          | 73.3, CH              | 3.83, m (1H)        |                                                 | C2, C4                                       | C2, C4                                        |
| C4          | 77.0, CH              | 3.68, m (1H)        | D1                                              | C3, C5                                       | C3, C5                                        |
| C5          | 69.4, CH              | 4.04, d (12.0, 1H)  |                                                 | C4, C6a, C6b                                 | C4, C6a, C6b                                  |
| C6a         | 63.2, CH <sub>2</sub> | 4.15, m (1H)        |                                                 | C5, C6b                                      | C5, C6b                                       |
| C6b         |                       | 4.23, d (12.0, 1H)  |                                                 | C5, C6a                                      | C5, C6a                                       |
| D1          | 99.9, CH              | 5.33, d (3.5, 1H)   | D2, D5                                          | D2                                           | D2, D3, D5                                    |
| D2          | 71.2, CH              | 3.56, m (1H)        |                                                 | D1, D3                                       | D1, D3                                        |
| D3          | 72.7, CH              | 3.59, m (1H)        |                                                 | D2, D4                                       | D2, D4                                        |
| D4          | 64.2, CH              | 2.48, t (9.0, 1H)   | D1, D3, D5, E1                                  | D3, D5                                       | D3, D5, D6                                    |



|     |                       |                    |            |        |                  |
|-----|-----------------------|--------------------|------------|--------|------------------|
| D5  | 69.7, CH              | 3.76, m (1H)       |            | D4, D6 | D4, D6           |
| D6  | 17.4, CH <sub>3</sub> | 1.34, d (5.7, 3H)  | D4, D5     | D5     | D3, D4, D5       |
| E1  | 55.0, CH              | 3.54, m (1H)       | E6         | E2, E7 | E2, E7           |
| E2  | 70.7, CH              | 3.82, m (1H)       |            | E1, E3 | E1, E3           |
| E3  | 70.8, CH              | 4.13, m (1H)       |            | E2, E4 | E2, E4           |
| E4  | 76.1, CH              | 4.22, m (1H)       | F1         | E3     | E3               |
| E5  | 136.5, C              |                    |            |        |                  |
| E6a |                       | 4.13, m (1H)       |            | E6b    | E6b              |
| E6b | 62.0, CH <sub>2</sub> | 4.22, m (1H)       |            | E6a    | E6a              |
| E7  | 126.3, CH             | 5.98, d (3.2, 1H)  | E1, E2, E6 | E1     | E1, E2, E6b      |
| F1  | 97.5, CH              | 5.38, d (3.4, 1H)  |            | F2     | F2               |
| F2  | 72.9, CH              | 3.58, m (1H)       |            | F1, F3 | F1, F3           |
| F3  | 73.5, CH              | 3.93, m (1H)       |            | F2, F4 | F2, F4           |
| F4  | 70.8, CH              | 3.60, m (1H)       | G1         | F3, F5 | F3, F5           |
| F5  | 71.1, CH              | 3.95, m (1H)       |            | F4, F6 | F4, F6           |
| F6  | 60.4, CH <sub>2</sub> | 3.81, m (2H)       |            | F5     | F5               |
| G1  | 99.6, CH              | 5.33, d (3.4, 1H)  | G2, G3     | G2     | G2, G3, G5       |
| G2  | 71.3, CH              | 3.56, m (1H)       |            | G1     | G1, G3           |
| G3  | 72.2, CH              | 3.59, m (1H)       |            | G4     | G4, G3           |
| G4  | 64.9, CH              | 2.48, t (9.0, 1H)  | H1         | G3, G5 | G3, G5, G6       |
| G5  | 69.6, CH              | 3.86, m (1H)       |            | G4, G6 | G4, G6           |
| G6  | 17.3, CH <sub>3</sub> | 1.34, d (5.7, 3H)  | G4, G5     | G5     | G3, G4, G5       |
| H1  | 56.0, CH              | 3.52, m (1H)       | H6         | H2, H7 | H2, H7           |
| H2  | 72.6, CH              | 3.72, m (1H)       |            | H1, H3 | H1, H3           |
| H3  | 72.6, CH              | 3.75, m (1H)       |            | H2, H4 | H2, H4           |
| H4  | 70.9, CH              | 4.07, d (12.0, 1H) |            | H3     | H3               |
| H5  | 139.0, C              |                    |            |        |                  |
| H6a |                       |                    |            |        |                  |
| H6b | 61.6, CH <sub>2</sub> | 4.12, m (2H)       |            |        |                  |
| H7  | 123.7, CH             | 5.90, d (3.5, 1H)  | H1, H2, H6 | H1     | H1, H2, H6a, H6b |

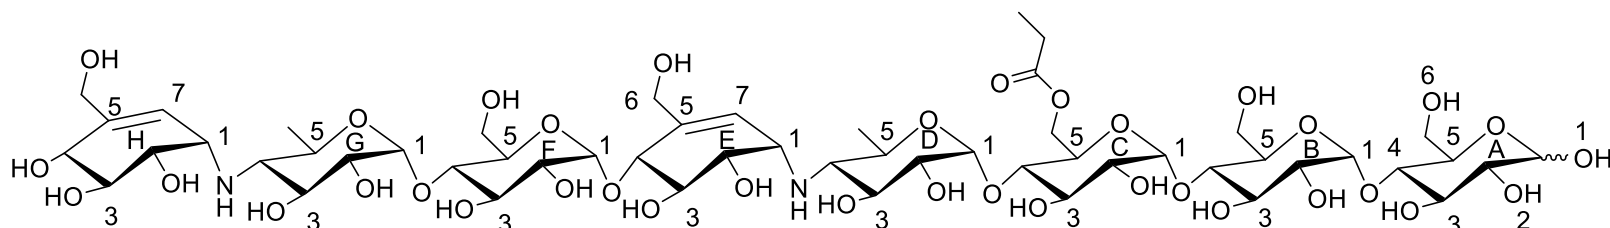

11

**Table S4.**  $^1\text{H}$  (500 MHz) and  $^{13}\text{C}$  (125 MHz) NMR data of **11** ( $\delta$  ppm) in  $\text{D}_2\text{O}$ .

| No.         | $\delta_{\text{C}}$   | $\delta_{\text{H}}$ | HMBC ( $^1\text{H} \rightarrow ^{13}\text{C}$ ) | COSY ( $^1\text{H} \rightarrow ^1\text{H}$ ) | TOCSY ( $^1\text{H} \rightarrow ^1\text{H}$ ) |
|-------------|-----------------------|---------------------|-------------------------------------------------|----------------------------------------------|-----------------------------------------------|
| A1 $\alpha$ | 95.3, CH              | 5.23, d (3.5, 1H)   | A2 $\alpha$ , A5 $\alpha$                       | A2 $\alpha$                                  | A2 $\alpha$ , A5 $\alpha$                     |
| A2 $\alpha$ | 74.8, CH              | 3.58, m (1H)        |                                                 | A1 $\alpha$ , A3 $\alpha$                    | A1 $\alpha$ , A3 $\alpha$                     |
| A3 $\alpha$ | 76.7, CH              | 3.97, m (1H)        |                                                 | A2 $\alpha$ , A4 $\alpha$                    | A2 $\alpha$ , A4 $\alpha$                     |
| A4 $\alpha$ | 80.2, CH              | 3.65, m (1H)        | B1                                              | A3 $\alpha$ , A5 $\alpha$                    | A3 $\alpha$ , A5 $\alpha$                     |
| A5 $\alpha$ | 73.3, CH              | 3.87, m (1H)        |                                                 | A4 $\alpha$                                  | A4 $\alpha$ , A6 $\alpha$                     |
| A6 $\alpha$ | 63.8, CH <sub>2</sub> | 3.87, m (2H)        |                                                 | overlapped                                   | A5 $\alpha$                                   |
| A1 $\beta$  | 99.2, CH              | 4.66, d (8.0, 1H)   | A2 $\beta$ , A5 $\beta$                         | A2 $\beta$                                   | A2 $\beta$ , A3 $\beta$ , A5 $\beta$          |
| A2 $\beta$  | 77.4, CH              | 3.28, t (9.0, 1H)   |                                                 | A1 $\beta$ , A3 $\beta$                      | A1 $\beta$ , A3 $\beta$                       |
| A3 $\beta$  | 79.7, CH              | 3.77, m (1H)        |                                                 | A2 $\beta$ , A4 $\beta$                      | A2 $\beta$ , A4 $\beta$                       |
| A4 $\beta$  | 80.2, CH              | 3.66, m (1H)        | B1                                              | A3 $\beta$ , A5 $\beta$                      | A3 $\beta$ , A5 $\beta$                       |
| A5 $\beta$  | 77.9, CH              | 3.62, m (1H)        |                                                 | A4 $\beta$ , A6 $\beta$                      | A4 $\beta$ , A6 $\beta$                       |
| A6 $\beta$  | 64.1, CH <sub>2</sub> | 3.91, m (2H)        |                                                 | A5 $\beta$                                   | A5 $\beta$                                    |
| B1          | 102.8, CH             | 5.41, d (3.5, 1H)   | B3, B4, B5                                      | B2                                           | B2, B3, B5                                    |
| B2          | 74.9, CH              | 3.64, m (1H)        |                                                 | B1, B3                                       | B1, B3                                        |
| B3          | 76.7, CH              | 3.96, m (1H)        |                                                 | B2, B4                                       | B2, B4                                        |
| B4          | 80.4, CH              | 3.67, m (1H)        | C1                                              | B3, B5                                       | B3, B5                                        |
| B5          | 74.6, CH              | 3.85, m (1H)        |                                                 | B4                                           | B4                                            |
| B6          | 63.9, CH <sub>2</sub> | 3.85, m (2H)        |                                                 | overlapped                                   | overlapped                                    |
| C1          | 103.0, CH             | 5.41, d (3.5, 1H)   | C3, C5                                          | C2                                           | C2, C3                                        |
| C2          | 74.5, CH              | 3.67, m (1H)        |                                                 | C1, C3                                       | C1, C3                                        |
| C3          | 76.6, CH              | 3.95, m (1H)        |                                                 | C2, C4                                       | C2, C4                                        |
| C4          | 81.3, CH              | 3.67, m (1H)        | D1                                              | C3, C5                                       | C3, C5                                        |
| C5          | 72.3, CH              | 4.05, d (12.0, 1H)  |                                                 | C4, C6a, C6b                                 | C4, C6a, C6b                                  |
| C6a         | 63.8, CH <sub>2</sub> | 4.22, m (1H)        |                                                 | C5, C6b                                      | C5, C6b                                       |
| C6b         |                       | 4.44, d (12.0, 1H)  |                                                 | C5, C6a                                      | C5, C6a                                       |
| D1          | 104.0, CH             | 5.29, d (3.5, 1H)   | D2, D5                                          | D2                                           | D2, D3, D5                                    |
| D2          | 74.6, CH              | 3.56, m (1H)        |                                                 | D1, D3                                       | D1, D3                                        |
| D3          | 76.3, CH              | 3.59, m (1H)        |                                                 | D2, D4                                       | D2, D4                                        |
| D4          | 67.7, CH              | 2.48, t (9.0, 1H)   | D3, D5, D6, E1                                  | D3, D5                                       | D2, D3, D5, D6                                |

|     |                       |                    |                |        |                  |
|-----|-----------------------|--------------------|----------------|--------|------------------|
| D5  | 73.2, CH              | 3.73, m (1H)       |                | D4, D6 | D4, D6           |
| D6  | 20.7, CH <sub>3</sub> | 1.30, d (5.7, 3H)  | D4, D5         | D5     | D3, D4, D5       |
| E1  | 58.4, CH              | 3.53, m (1H)       | E6             | E2, E7 | E2, E7           |
| E2  | 73.0, CH              | 3.80, m (1H)       |                | E1, E3 | E1, E3           |
| E3  | 74.1, CH              | 4.13, m (1H)       |                | E2, E4 | E2, E4           |
| E4  | 79.6, CH              | 4.22, m (1H)       | F1             | E3     | E3               |
| E5  | 139.9, C              |                    |                |        |                  |
| E6a |                       | 4.13, m (1H)       |                | E6b    | E6b              |
| E6b | 65.4, CH <sub>2</sub> | 4.22, m (1H)       |                | E6a    | E6a              |
| E7  | 129.7, CH             | 5.98, d (3.2, 1H)  | E1, E2, E4, E6 | E1     | E1, E2, E6b      |
| F1  | 101.0, CH             | 5.38, d (3.4, 1H)  |                | F2     | F2               |
| F2  | 74.9, CH              | 3.62, m (1H)       |                | F1, F3 | F1, F3           |
| F3  | 76.9, CH              | 3.93, m (1H)       |                | F2, F4 | F2, F4           |
| F4  | 74.2, CH              | 3.64, m (1H)       | G1             | F3     | F3, F5           |
| F5  | 74.5, CH              | 3.93, m (1H)       |                | F4, F6 | F4, F6           |
| F6  | 66.9, CH <sub>2</sub> | 3.81, m (2H)       |                | F5     | F5               |
| G1  | 103.3, CH             | 5.32, d (3.4, 1H)  | G2, G3         | G2     | G2, G4, G5       |
| G2  | 74.7, CH              | 3.58, m (1H)       |                | G1, G3 | G1, G3           |
| G3  | 75.9, CH              | 3.62, m (1H)       |                | G2, G4 | G2, G4           |
| G4  | 68.3, CH              | 2.48, t (9.0, 1H)  | H1             | G3, G5 | G2, G3, G5, G6   |
| G5  | 73.0, CH              | 3.76, m (1H)       |                | G4, G6 | G4, G6           |
| G6  | 20.8, CH <sub>3</sub> | 1.34, d (5.7, 3H)  | G4, G5         | G5     | G3, G4, G5       |
| H1  | 59.4, CH              | 3.54, m (1H)       | H6             | H2, H7 | H2, H7           |
| H2  | 76.1, CH              | 3.68, m (1H)       |                | H1, H3 | H1, H3           |
| H3  | 76.3, CH              | 3.77, m (1H)       |                | H2, H4 | H2, H4           |
| H4  | 74.3, CH              | 4.04, d (12.0, 1H) |                | H3     | H3               |
| H5  | 142.3, C              |                    |                |        |                  |
| H6a |                       | 4.12, m (1H)       |                | H6b    |                  |
| H6b | 65.0 CH <sub>2</sub>  | 4.22, m (1H)       |                | H6a    |                  |
| H7  | 127.2, CH             | 5.90, d (3.5, 1H)  | H1, H2, H6     | H1     | H1, H2, H6a, H6b |
| 1'  | 180.8, C=O            |                    |                |        |                  |
| 2'  | 30.6, CH <sub>2</sub> | 2.48, m (2H)       | 1', 3'         | 3'     | 3'               |
| 3'  | 11.7, CH <sub>3</sub> | 1.13, d (7.2, 3H)  | 2', 3'         | 2'     | 2'               |

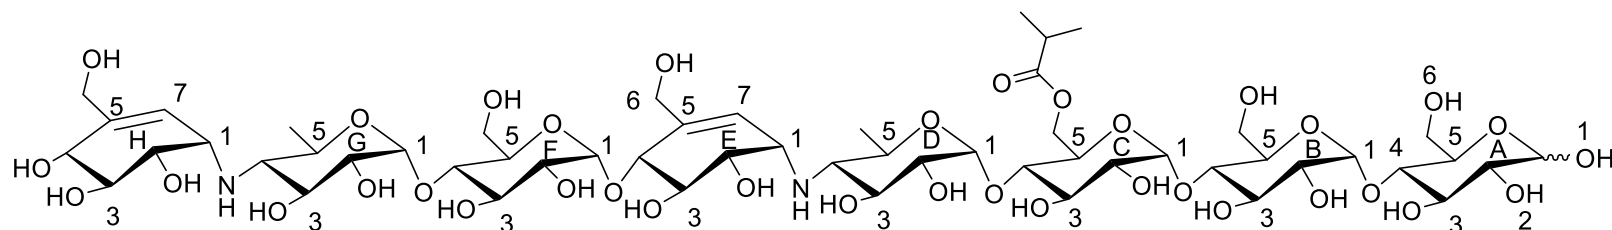

12

**Table S5.**  $^1\text{H}$  (500 MHz) and  $^{13}\text{C}$  (125 MHz) NMR data of **12** ( $\delta$  ppm) in  $\text{D}_2\text{O}$ .

| No.         | $\delta_{\text{C}}$   | $\delta_{\text{H}}$ | HMBC ( $^1\text{H} \rightarrow ^{13}\text{C}$ ) | COSY ( $^1\text{H} \rightarrow ^1\text{H}$ ) | TOCSY ( $^1\text{H} \rightarrow ^1\text{H}$ ) |
|-------------|-----------------------|---------------------|-------------------------------------------------|----------------------------------------------|-----------------------------------------------|
| A1 $\alpha$ | 91.9, CH              | 5.24, d (3.4, 1H)   | A2 $\alpha$ , A5 $\alpha$                       | A2 $\alpha$                                  | A2 $\alpha$ , A5 $\alpha$                     |
| A2 $\alpha$ | 71.3, CH              | 3.52, m (1H)        |                                                 | A1 $\alpha$ , A3 $\alpha$                    | A1 $\alpha$ , A3 $\alpha$                     |
| A3 $\alpha$ | 73.3, CH              | 4.16, m (1H)        |                                                 | A2 $\alpha$ , A4 $\alpha$                    | A2 $\alpha$ , A4 $\alpha$                     |
| A4 $\alpha$ | 76.8, CH              | 3.69, m (1H)        | B1                                              | A3 $\alpha$ , A5 $\alpha$                    | A3 $\alpha$ , A5 $\alpha$                     |
| A5 $\alpha$ | 70.0, CH              | 3.90, m (1H)        |                                                 | A4 $\alpha$ , A6 $\alpha$ ,                  | A4 $\alpha$ , A6 $\alpha$                     |
| A6 $\alpha$ | 60.5, CH <sub>2</sub> | 3.74, m (2H)        |                                                 | A5 $\alpha$                                  | A5 $\alpha$                                   |
| A1 $\beta$  | 95.8, CH              | 4.66, d (8.0, 1H)   | A2 $\beta$ , A5 $\beta$                         | A2 $\beta$                                   | A2 $\beta$ , A3 $\beta$ , A5 $\beta$          |
| A2 $\beta$  | 74.0, CH              | 3.29, m (1H)        |                                                 | A1 $\beta$ , A3 $\beta$                      | A1 $\beta$ , A3 $\beta$                       |
| A3 $\beta$  | 76.3, CH              | 3.78, m (1H)        |                                                 | A2 $\beta$ , A4 $\beta$                      | A2 $\beta$ , A4 $\beta$                       |
| A4 $\beta$  | 76.8, CH              | 3.67, m (1H)        | B1                                              | A3 $\beta$ , A5 $\beta$                      | A3 $\beta$ , A5 $\beta$                       |
| A5 $\beta$  | 74.6, CH              | 3.62, m (1H)        |                                                 | A4 $\beta$ , A6 $\beta$                      | A4 $\beta$ , A6 $\beta$                       |
| A6 $\beta$  | 60.6, CH <sub>2</sub> | 3.92, m (2H)        |                                                 | A5 $\beta$                                   | A5 $\beta$                                    |
| B1          | 99.6, CH              | 5.38, d (3.5, 1H)   | B3, B5                                          | B2                                           | B3, B4                                        |
| B2          | 71.6, CH              | 3.58, m (1H)        |                                                 | B1, B3                                       | B1, B3                                        |
| B3          | 73.4, CH              | 3.94, m (1H)        |                                                 | B2, B4                                       | B2, B4                                        |
| B4          | 77.1, CH              | 3.63, m (1H)        | C1                                              | B3, B5                                       | B3, B5                                        |
| B5          | 71.2, CH              | 3.80, m (1H)        |                                                 | B4                                           | B4                                            |
| B6          | 60.7, CH <sub>2</sub> | 3.80, m (2H)        |                                                 | overlapped                                   | overlapped                                    |
| C1          | 99.4, CH              | 5.38, d (3.5, 1H)   | C3, C5                                          | C2                                           | C2, C3                                        |
| C2          | 71.1, CH              | 3.62, m (1H)        |                                                 | C1, C3                                       | C1, C3                                        |
| C3          | 73.2, CH              | 3.92, m (1H)        |                                                 | C2, C4                                       | C2, C4                                        |
| C4          | 78.2, CH              | 3.62, m (1H)        | D1                                              | C3, C5                                       | C3, C5                                        |
| C5          | 69.0, CH              | 4.03, d (12.0, 1H)  |                                                 | C4, C6a, C6b                                 | C4, C6a, C6b                                  |
| C6a         | 63.5, CH <sub>2</sub> | 4.20, m (1H)        |                                                 | C5, C6b                                      | C5, C6b                                       |
| C6b         |                       | 4.45, d (12.0, 1H)  |                                                 | C5, C6a                                      | C5, C6a                                       |
| D1          | 100.7, CH             | 5.28, d (3.5, 1H)   | D2, D5                                          | D2                                           | D2, D3, D4                                    |
| D2          | 71.2, CH              | 3.54, m (1H)        |                                                 | D1                                           | D1, D3                                        |
| D3          | 73.0, CH              | 3.56, m (1H)        |                                                 | D4                                           | D2, D4                                        |
| D4          | 64.3, CH              | 2.47, t (8.8, 1H)   | D3, D5, E1                                      | D3, D5                                       | D1, D2, D3, D5                                |

|     |                       |                    |            |            |                  |
|-----|-----------------------|--------------------|------------|------------|------------------|
| D5  | 69.8, CH              | 3.71, m (1H)       |            | D4, D6     | D4, D6           |
| D6  | 17.4, CH <sub>3</sub> | 1.31, d (5.6, 3H)  | D4, D5     | D5         | D3, D4, D5       |
| E1  | 55.0, CH              | 3.53, m (1H)       | E6         | E2, E7     | E2, E7           |
| E2  | 70.8, CH              | 3.80, m (1H)       |            | E1, E3     | E1, E3           |
| E3  | 70.9, CH              | 4.14, m (1H)       |            | E2, E4     | E2, E4           |
| E4  | 76.2, CH              | 4.23, m (1H)       | F1         | E3         | E3               |
| E5  | 136.5, C              |                    |            |            |                  |
| E6a |                       | 4.14, m (1H)       |            | E6b        | E6b              |
| E6b | 62.0, CH <sub>2</sub> | 4.23, m (1H)       |            | E6a        | E6a              |
| E7  | 126.3, CH             | 5.98, d (3.1, 1H)  | E2, E6     | E1         | E1, E2, E6b      |
| F1  | 97.8, CH              | 5.42, d (3.5, 1H)  |            | F2         | F2               |
| F2  | 73.2, CH              | 3.68, m (1H)       |            | F1, F3     | F1, F3           |
| F3  | 73.5, CH              | 3.94, m (1H)       |            | F2, F4     | F2, F4           |
| F4  | 70.9, CH              | 3.66, m (1H)       | G1         | F3, F5     | F3, F5           |
| F5  | 71.2, CH              | 3.96, m (1H)       |            | F4, F6     | F4, F6           |
| F6  | 60.4, CH <sub>2</sub> | 3.82, m (2H)       |            | F5         | F5               |
| G1  | 99.9, CH              | 5.33, d (3.4, 1H)  | G2, G3     | G2         | G2, G4           |
| G2  | 71.2, CH              | 3.61, m (1H)       |            | G1         | G1, G3           |
| G3  | 72.6, CH              | 3.61, m (1H)       |            | G4         | G2, G4           |
| G4  | 64.9, CH              | 2.47, t (8.8, 1H)  | G3, G5, H1 | G3, G5     | G2, G3, G5       |
| G5  | 69.6, CH              | 3.77, m (1H)       |            | G4, G6     | G4, G6           |
| G6  | 17.3, CH <sub>3</sub> | 1.35, d (5.6, 3H)  | G4, G5     | G5         | G3, G4, G5       |
| H1  | 56.0, CH              | 3.54, m (1H)       | H6         | H2, H7     | H2, H7           |
| H2  | 72.7, CH              | 3.69, m (1H)       |            | H1, H3     | H1, H3           |
| H3  | 72.9, CH              | 3.77, m (1H)       |            | H2, H4     | H2, H4           |
| H4  | 71.0, CH              | 4.06, d (12.0, 1H) |            | H3         | H3               |
| H5  | 139.0, C              |                    |            |            |                  |
| H6a |                       | 4.13, m (1H)       |            | H6b        |                  |
| H6b | 61.6, CH <sub>2</sub> | 4.25, m (1H)       |            | H6a        |                  |
| H7  | 123.8, CH             | 5.91, d (3.4, 1H)  | H1, H2, H6 | H1         | H1, H2, H6a, H6b |
| 1'  | 180.1, C=O            |                    |            |            |                  |
| 2'  | 33.9, CH              | 2.72, m (2H)       | 1', 3', 4' | 3'         | 3', 4'           |
| 3'  | 18.3, CH <sub>3</sub> | 1.19, d (3.0, 3H)  | 1, 2', 4'  | 2'         | 2'               |
| 4'  | 18.2, CH <sub>3</sub> | 1.19, d (3.0, 3H)  | 1, 2', 3'  | Overlapped | 2'               |

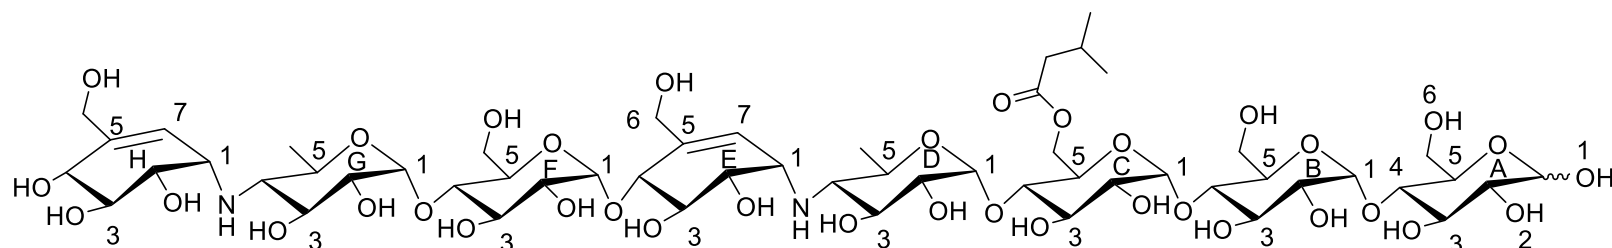

**13**

**Table S6.**  $^1\text{H}$  (500 MHz) and  $^{13}\text{C}$  (125 MHz) NMR data of **13** ( $\delta$ ppm) in  $\text{D}_2\text{O}$ .

| No.         | $\delta_{\text{C}}$   | $\delta_{\text{H}}$ | HMBC ( $^1\text{H} \rightarrow ^{13}\text{C}$ ) | COSY ( $^1\text{H} \rightarrow ^1\text{H}$ ) | TOCSY ( $^1\text{H} \rightarrow ^1\text{H}$ ) |
|-------------|-----------------------|---------------------|-------------------------------------------------|----------------------------------------------|-----------------------------------------------|
| A1 $\alpha$ | 92.0, CH              | 5.24, d (3.5, 1H)   | A2 $\alpha$ , A5 $\alpha$                       | A2 $\alpha$                                  | A2 $\alpha$ , A5 $\alpha$                     |
| A2 $\alpha$ | 71.4, CH              | 3.51, m (1H)        |                                                 | A1 $\alpha$ , A3 $\alpha$                    | A1 $\alpha$ , A3 $\alpha$                     |
| A3 $\alpha$ | 73.4, CH              | 3.92, m (1H)        |                                                 | A2 $\alpha$ , A4 $\alpha$                    | A2 $\alpha$ , A4 $\alpha$                     |
| A4 $\alpha$ | 76.9, CH              | 3.69, m (1H)        | B1                                              | A3 $\alpha$ , A5 $\alpha$                    | A3 $\alpha$ , A5 $\alpha$                     |
| A5 $\alpha$ | 70.0, CH              | 3.82, m (1H)        |                                                 | A4 $\alpha$ , A6 $\alpha$ ,                  | A4 $\alpha$ , A6 $\alpha$                     |
| A6 $\alpha$ | 60.5, CH <sub>2</sub> | 3.79, m (2H)        |                                                 | A5 $\alpha$                                  | A5 $\alpha$                                   |
| A1 $\beta$  | 95.8, CH              | 4.66, d (7.8, 1H)   | A2 $\beta$ , A5 $\beta$                         | A2 $\beta$                                   | A2 $\beta$ , A4 $\beta$ , A5 $\beta$          |
| A2 $\beta$  | 74.0, CH              | 3.28, m (1H)        |                                                 | A1 $\beta$ , A3 $\beta$                      | A1 $\beta$ , A3 $\beta$                       |
| A3 $\beta$  | 76.2, CH              | 3.77, m (1H)        |                                                 | A2 $\beta$ , A4 $\beta$                      | A2 $\beta$ , A4 $\beta$                       |
| A4 $\beta$  | 76.8, CH              | 3.66, m (1H)        | B1                                              | A3 $\beta$ , A5 $\beta$                      | A3 $\beta$ , A5 $\beta$                       |
| A5 $\beta$  | 74.6, CH              | 3.60, m (1H)        |                                                 | A4 $\beta$ , A6 $\beta$                      | A4 $\beta$ , A6 $\beta$                       |
| A6 $\beta$  | 60.5, CH <sub>2</sub> | 3.90, m (2H)        |                                                 | A5 $\beta$                                   | A5 $\beta$                                    |
| B1          | 99.4, CH              | 5.41, d (3.5, 1H)   | B2, B3, B5                                      | B2                                           | B2, B3, B5                                    |
| B2          | 71.6, CH              | 3.62, m (1H)        |                                                 | B1, B3                                       | B1, B3                                        |
| B3          | 73.2, CH              | 3.96, m (1H)        |                                                 | B2, B4                                       | B2, B4                                        |
| B4          | 77.1, CH              | 3.64, m (1H)        | C1                                              | B3, B5                                       | B3, B5                                        |
| B5          | 71.3, CH              | 3.85, m (1H)        |                                                 | B4                                           | B4                                            |
| B6          | 60.7, CH <sub>2</sub> | 3.85, m (2H)        |                                                 | overlapped                                   | overlapped                                    |
| C1          | 99.6, CH              | 5.41, d (3.5, 1H)   | C2, C3, C5                                      | C2                                           | C2, C3                                        |
| C2          | 71.2, CH              | 3.62, m (1H)        |                                                 | C1, C3                                       | C1, C3                                        |
| C3          | 73.2, CH              | 3.96, m (1H)        |                                                 | C2, C4                                       | C2, C4                                        |
| C4          | 78.0, CH              | 3.64, m (1H)        | D1                                              | C3, C5                                       | C3, C5                                        |
| C5          | 69.0, CH              | 4.05, d (12.0, 1H)  |                                                 | C4, C6a, C6b                                 | C4, C6a, C6b                                  |
| C6a         | 63.4, CH <sub>2</sub> | 4.23, m (1H)        |                                                 | C5, C6b                                      | C5, C6b                                       |
| C6b         |                       | 4.49, d (12.0, 1H)  |                                                 | C5, C6a                                      | C5, C6a                                       |
| D1          | 100.6, CH             | 5.29, d (3.5, 1H)   | D2, D5                                          | D2                                           | D2, D4, D5                                    |
| D2          | 71.3, CH              | 3.58, m (1H)        |                                                 | D1                                           | D1                                            |
| D3          | 73.0, CH              | 3.60, m (1H)        |                                                 | D4                                           | D4                                            |

|     |                       |                    |                |            |                  |
|-----|-----------------------|--------------------|----------------|------------|------------------|
| D4  | 64.3, CH              | 2.47, t (9.0, 1H)  | D3, D5, D6, E1 | D3, D5     | D1, D3, D5, D6   |
| D5  | 69.8, CH              | 3.75, m (1H)       |                | D4, D6     | D4, D6           |
| D6  | 17.4, CH <sub>3</sub> | 1.32, d (5.6, 3H)  | D4, D5         | D5         | D3, D4, D5       |
| E1  | 55.0, CH              | 3.48, m (1H)       | E6             | E2, E7     | E2, E7           |
| E2  | 69.7, CH              | 3.79, m (1H)       |                | E1, E3     | E1, E3           |
| E3  | 70.8, CH              | 4.14, m (1H)       |                | E2, E4     | E2, E4           |
| E4  | 76.4, CH              | 4.23, m (1H)       | F1             | E3         | E3               |
| E5  | 136.5, C              |                    |                |            |                  |
| E6a |                       | 4.14, m (1H)       |                | E6b        | E6b              |
| E6b | 62.0, CH <sub>2</sub> | 4.23, m (1H)       |                | E6a        | E6a              |
| E7  | 126.4, CH             | 5.99, d (3.2, 1H)  | E2, E6         | E1         | E1, E2, E6b      |
| F1  | 97.6, CH              | 5.38, d (3.5, 1H)  |                | F2         | F2, F5           |
| F2  | 72.7, CH              | 3.61, m (1H)       |                | F1, F3     | F1, F3           |
| F3  | 73.5, CH              | 3.93, m (1H)       |                | F2         | F2, F4           |
| F4  | 70.9, CH              | 3.61, m (1H)       | G1             | F3         | F3, F5           |
| F5  | 71.2, CH              | 3.93, m (1H)       |                | F4, F6     | F4, F6           |
| F6  | 60.7, CH <sub>2</sub> | 3.82, m (2H)       |                | F5         | F5               |
| G1  | 100.0, CH             | 5.33, d (3.4, 1H)  | G2, G3         | G2         | G2, G4           |
| G2  | 71.5, CH              | 3.58, m (1H)       |                | G1         | G1, G3           |
| G3  | 72.6, CH              | 3.60, m (1H)       |                | G4         | G2, G4           |
| G4  | 65.0, CH              | 2.47, t (9.0, 1H)  | G3, G5, H1     | G3, G5     | G1, G2, G5, G6   |
| G5  | 69.6, CH              | 3.75, m (1H)       |                | G4, G6     | G4, G6           |
| G6  | 17.4, CH <sub>3</sub> | 1.35, d (5.6, 3H)  | G4, G5         | G5         | G3, G4, G5       |
| H1  | 56.0, CH              | 3.48, m (1H)       | H6             | H2, H7     | H2, H7           |
| H2  | 72.8, CH              | 3.67, m (1H)       |                | H1, H3     | H1, H3           |
| H3  | 73.0, CH              | 3.76, m (1H)       |                | H2, H4     | H2, H4           |
| H4  | 71.0, CH              | 4.05, d (12.0, 1H) |                | H3         | H3               |
| H5  | 139.0, C              |                    |                |            |                  |
| H6a |                       | 4.12, m (1H)       |                | H6b        |                  |
| H6b | 61.6, CH <sub>2</sub> | 4.23, m (1H)       |                | H6a        |                  |
| H7  | 123.8, CH             | 5.91, d (3.4, 1H)  | H1, H2, H6     | H1         | H1, H2, H6a, H6b |
| 1'  | 176.2, C=O            |                    |                |            |                  |
| 2'  | 42.9, CH <sub>2</sub> | 2.36, m (2H)       | 1', 3', 4'     | 3'         | 3', 4'           |
| 3'  | 25.5, CH              | 2.08, m (1H)       | 1, 2', 4'      | 2', 4'     | 2', 4'           |
| 4'  | 21.7, CH <sub>3</sub> | 0.96, d (6.6, 3H)  | 2', 3'         | 3'         | 3'               |
| 5'  | 21.7, CH <sub>3</sub> | 0.96, d (6.6, 3H)  |                | overlapped | overlapped       |

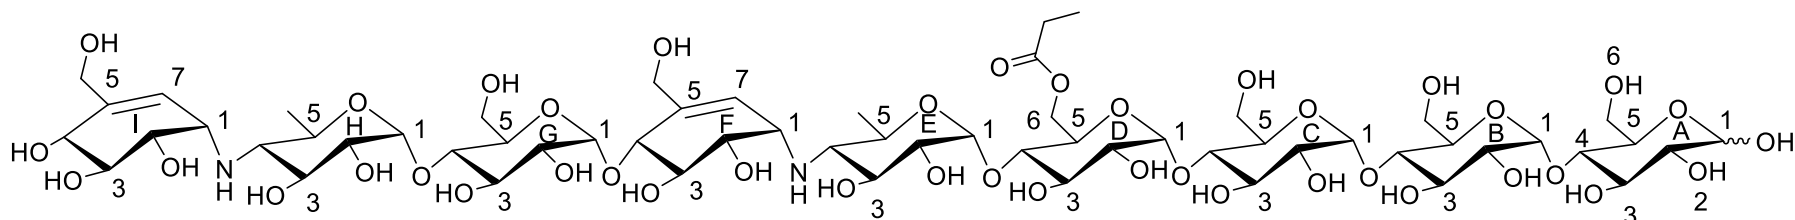

14

**Table S7.**  $^1\text{H}$  (500 MHz) and  $^{13}\text{C}$  (125 MHz) NMR data of **14** ( $\delta$  ppm) in  $\text{D}_2\text{O}$ .

| No.         | $\delta_{\text{C}}$   | $\delta_{\text{H}}$ | HMBC ( $^1\text{H} \rightarrow ^{13}\text{C}$ ) | COSY ( $^1\text{H} \rightarrow ^1\text{H}$ ) | TOCSY ( $^1\text{H} \rightarrow ^1\text{H}$ ) |
|-------------|-----------------------|---------------------|-------------------------------------------------|----------------------------------------------|-----------------------------------------------|
| A1 $\alpha$ | 94.7, CH              | 5.20, d (3.5, 1H)   | A2 $\alpha$ , A5 $\alpha$                       | A2 $\alpha$                                  | A2 $\alpha$ , A5 $\alpha$                     |
| A2 $\alpha$ | 74.2, CH              | 3.53, m (1H)        |                                                 | A1 $\alpha$ , A3 $\alpha$                    | A1 $\alpha$ , A3 $\alpha$                     |
| A3 $\alpha$ | 76.1, CH              | 3.93, m (1H)        |                                                 | A2 $\alpha$ , A4 $\alpha$                    | A2 $\alpha$ , A4 $\alpha$                     |
| A4 $\alpha$ | 79.6, CH              | 3.61, m (1H)        | B1                                              | A3 $\alpha$ , A5 $\alpha$                    | A3 $\alpha$ , A5 $\alpha$                     |
| A5 $\alpha$ | 72.8, CH              | 3.85, m (1H)        |                                                 | A4 $\alpha$ , A6 $\alpha$ ,                  | A4 $\alpha$ , A6 $\alpha$ ,                   |
| A6 $\alpha$ | 63.2, CH <sub>2</sub> | 3.78, m (2H)        |                                                 | A5 $\alpha$                                  | A5 $\alpha$                                   |
| A1 $\beta$  | 98.6, CH              | 4.62, d (8.0, 1H)   | A5 $\beta$                                      | A2 $\beta$                                   | A2 $\beta$ , A3 $\beta$ , A5 $\beta$          |
| A2 $\beta$  | 76.8, CH              | 3.24, t (9.0, 1H)   |                                                 | A1 $\beta$ , A3 $\beta$                      | A1 $\beta$ , A3 $\beta$                       |
| A3 $\beta$  | 79.1, CH              | 3.74, m (1H)        |                                                 | A2 $\beta$ , A4 $\beta$                      | A2 $\beta$ , A4 $\beta$                       |
| A4 $\beta$  | 79.7, CH              | 3.63, m (1H)        | B1                                              | A3 $\beta$                                   | A3 $\beta$ ,                                  |
| A5 $\beta$  | 77.4, CH              | 3.61, m (1H)        |                                                 | A6 $\beta$                                   | A6 $\beta$                                    |
| A6 $\beta$  | 63.3, CH <sub>2</sub> | 3.88, m (2H)        |                                                 | A5 $\beta$                                   | A5 $\beta$                                    |
| B1          | 102.2, CH             | 5.38, d (3.5, 1H)   | B2, B3, B5                                      | B2                                           | B2, B3                                        |
| B2          | 74.4, CH              | 3.61, m (1H)        |                                                 | B1, B3                                       | B1, B3                                        |
| B3          | 76.2, CH              | 3.93, m (1H)        |                                                 | B2, B4                                       | B2, B4                                        |
| B4          | 79.9, CH              | 3.63, m (1H)        | C1                                              | B3, B5                                       | B3, B5                                        |
| B5          | 74.0, CH              | 3.82, m (1H)        |                                                 | B4                                           | B4                                            |
| B6          | 63.4, CH <sub>2</sub> | 3.82, m (2H)        |                                                 | overlapped                                   | overlapped                                    |
| C1          | 102.3, CH             | 5.38, d (3.5, 1H)   | C2, C3, C5                                      | C2                                           | C2, C3                                        |
| C2          | 74.3, CH              | 3.61, m (1H)        |                                                 | C1, C3                                       | C1, C3                                        |
| C3          | 76.1, CH              | 3.93, m (1H)        |                                                 | C2, C4                                       | C2, C4                                        |
| C4          | 79.9, CH              | 3.63, m (1H)        | D1                                              | C3, C5                                       | C3, C5                                        |
| C5          | 74.1, CH              | 3.82, m (1H)        |                                                 | C4                                           | C4                                            |
| C6          | 63.5, CH <sub>2</sub> | 3.82, m (2H)        |                                                 | overlapped                                   | overlapped                                    |
| D1          | 102.4, CH             | 5.38, d (3.5, 1H)   | D2, D3, D5                                      | D2                                           | D2, D3                                        |
| D2          | 73.9, CH              | 3.63, m (1H)        |                                                 | D1, D3                                       | D1, D3                                        |
| D3          | 76.0, CH              | 3.93, m (1H)        |                                                 | D2                                           | D2                                            |
| D4          | 80.7, CH              | 3.63, m (1H)        | E1                                              | D3, D5                                       | D3, D5                                        |
| D5          | 71.7, CH              | 4.01, d (12.0, 1H)  |                                                 | D4, D6a, D6b                                 | D4, D6a, D6b                                  |



|     |                       |                    |                |         |                |
|-----|-----------------------|--------------------|----------------|---------|----------------|
| D6a |                       | 4.19, m (1H)       |                | D5, D6b | D5, D6b        |
| D6b | 67.1, CH <sub>2</sub> | 4.44, d (12.0, 1H) |                | D5, D6a | D5, D6a        |
| E1  | 103.4, CH             | 5.25, d (3.5, 1H)  | E3, E5         | E2      | E2, E4         |
| E2  | 74.1, CH              | 3.57, m (1H)       |                | E1, E3  | E1, E3, E4, E6 |
| E3  | 75.8, CH              | 3.61, m (1H)       |                | E2, E4  | E2, E4         |
| E4  | 67.8, CH              | 2.43, t (9.0, 1H)  | E2, E5, E6, F1 | E3, E5  | E3, E5, E6     |
| E5  | 72.6, CH              | 3.73, m (1H)       |                | E4, E6  | E4, E6         |
| E6  | 20.2, CH <sub>3</sub> | 1.27, d (5.6, 3H)  | E4, E5         | E5      | E4, E5         |
| F1  | 57.8, CH              | 3.49, m (1H)       | F2, F6         | F2, F7  | F2, F3, F7     |
| F2  | 72.5, CH              | 3.77, m (1H)       |                | F1, F3  | F1, F3         |
| F3  | 73.6, CH              | 4.09, m (1H)       |                | F2, F4  | F2, F4         |
| F4  | 79.0, CH              | 4.19, m (1H)       | G1             | F3      | F3             |
| F5  | 139.3, C              |                    |                |         |                |
| F6a |                       | 4.09, m (1H)       |                | F6b     | F6b            |
| F6b | 64.8, CH <sub>2</sub> | 4.19, m (1H)       |                | F6a     | F6a            |
| F7  | 129.1, CH             | 5.94, d (3.2, 1H)  | F2, F6         | F1      | F1, F2, F4     |
| G1  | 100.4, CH             | 5.34, d (3.4, 1H)  | G3, G5         | G2      | G2, G5         |
| G2  | 74.4, CH              | 3.61, m (1H)       |                | G1, G3  | G1, G3         |
| G3  | 76.3, CH              | 3.91, m (1H)       |                | G2      | G2             |
| G4  | 73.7, CH              | 3.61, m (1H)       | H1             | G3      | G3             |
| G5  | 74.0, CH              | 3.91, m (1H)       |                | G4, G6  | G4, G6         |
| G6  | 66.3, CH <sub>2</sub> | 3.86, m (2H)       |                | G5      | G5             |
| H1  | 102.7, CH             | 5.29, d (3.4, 1H)  | H3, H5         | H2      | H2             |
| H2  | 74.4, CH              | 3.57, m (1H)       |                | H1, H3  | H1, H3, H4, H6 |
| H3  | 75.4, CH              | 3.61, m (1H)       |                | H2, H4  | H2, H4         |
| H4  | 67.8, CH              | 2.43, t (9.0, 1H)  | H1, H2, H5, H6 | H3, H5  | H3, H5, H6     |
| H5  | 72.4, CH              | 3.74, m (1H)       |                | H4, H6  | H4, H6         |
| H6  | 20.2, CH <sub>3</sub> | 1.31, d (5.6, 3H)  | H4, H5         | H5      | H4, H5         |
| I1  | 58.8, CH              | 3.49, m (1H)       | I2, I6         | I2, I7  | I2, I3, I7     |
| I2  | 75.6, CH              | 3.67, m (1H)       |                | I1, I3  | I1, I3         |
| I3  | 75.8, CH              | 3.77, m (1H)       |                | I2, I4  | I2, I4         |
| I4  | 73.8, CH              | 4.01, d (12.0, 1H) |                | I3      | I3             |
| I5  | 141.8, C              |                    |                |         |                |
| I6a |                       | 4.09, m (1H)       |                | I6b     | I6b            |
| I6b | 64.4, CH <sub>2</sub> | 4.19, m (1H)       |                | I6a     | I6a            |
| I7  | 126.6, CH             | 5.86, d (3.3, 1H)  | I1, I2, I6     | I1      | I1             |
| 1'  | 180.2, C=O            |                    |                |         |                |
| 2'  | 30.0, CH <sub>2</sub> | 2.43, m (2H)       | 1', 3'         | 3'      | 3'             |
| 3'  | 11.1, CH <sub>3</sub> | 1.09, d (7.0, 3H)  | 1', 2'         | 2'      | 2'             |

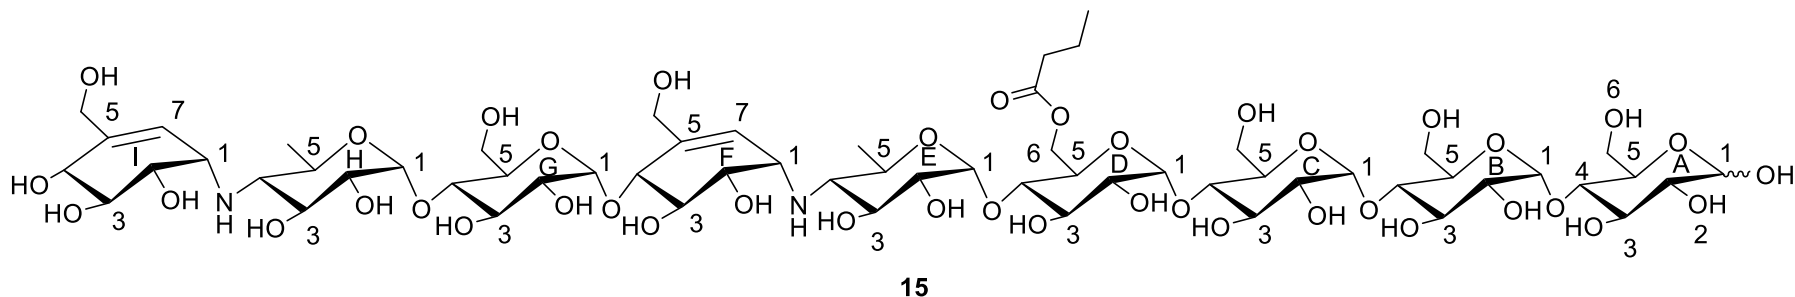

**Table S8.**  $^1\text{H}$  (500 MHz) and  $^{13}\text{C}$  (125 MHz) NMR data of **15** ( $\delta$ ppm) in  $\text{D}_2\text{O}$ .

| No.         | $\delta_{\text{C}}$   | $\delta_{\text{H}}$ | HMBC ( $^1\text{H} \rightarrow ^{13}\text{C}$ ) | COSY ( $^1\text{H} \rightarrow ^1\text{H}$ ) | TOCSY ( $^1\text{H} \rightarrow ^1\text{H}$ ) |
|-------------|-----------------------|---------------------|-------------------------------------------------|----------------------------------------------|-----------------------------------------------|
| A1 $\alpha$ | 91.9, CH              | 5.22, d (3.5, 1H)   | A2 $\alpha$ , A5 $\alpha$                       | A2 $\alpha$                                  | A2 $\alpha$ , A5 $\alpha$                     |
| A2 $\alpha$ | 71.4, CH              | 3.52, m (1H)        |                                                 | A1 $\alpha$ , A3 $\alpha$                    | A1 $\alpha$ , A3 $\alpha$                     |
| A3 $\alpha$ | 73.3, CH              | 3.93, m (1H)        |                                                 | A2 $\alpha$ , A4 $\alpha$                    | A2 $\alpha$ , A4 $\alpha$                     |
| A4 $\alpha$ | 76.8, CH              | 3.62, m (1H)        | B1                                              | A3 $\alpha$ , A5 $\alpha$                    | A3 $\alpha$ , A5 $\alpha$                     |
| A5 $\alpha$ | 69.9, CH              | 3.85, m (1H)        |                                                 | A4 $\alpha$ , A6 $\alpha$ ,                  | A4 $\alpha$ , A6 $\alpha$ ,                   |
| A6 $\alpha$ | 60.4, CH <sub>2</sub> | 3.79, m (2H)        |                                                 | A5 $\alpha$                                  | A5 $\alpha$                                   |
| A1 $\beta$  | 95.8, CH              | 4.65, d (8.0, 1H)   | A2 $\beta$ , A5 $\beta$                         | A2 $\beta$                                   | A2 $\beta$ , A3 $\beta$ , A5 $\beta$          |
| A2 $\beta$  | 74.0, CH              | 3.27, m (1H)        |                                                 | A1 $\beta$ , A3 $\beta$                      | A1 $\beta$ , A3 $\beta$                       |
| A3 $\beta$  | 76.3, CH              | 3.77, m (1H)        |                                                 | A2 $\beta$ , A4 $\beta$                      | A2 $\beta$ , A4 $\beta$                       |
| A4 $\beta$  | 76.8, CH              | 3.65, m (1H)        | B1                                              | A3 $\beta$ , A5 $\beta$                      | A3 $\beta$ , A5 $\beta$                       |
| A5 $\beta$  | 74.5, CH              | 3.60, m (1H)        |                                                 | A4 $\beta$ , A6 $\beta$                      | A4 $\beta$ , A6 $\beta$                       |
| A6 $\beta$  | 60.5, CH <sub>2</sub> | 3.89, m (2H)        |                                                 | A5 $\beta$                                   | A5 $\beta$                                    |
| B1          | 99.4, CH              | 5.40, d (3.5, 1H)   | B2, B3, B5                                      | B2                                           | B2, B3, B5                                    |
| B2          | 71.5, CH              | 3.60, m (1H)        |                                                 | B1, B3                                       | B1, B3                                        |
| B3          | 73.3, CH              | 3.95, m (1H)        |                                                 | B2, B4                                       | B2, B4                                        |
| B4          | 77.0, CH              | 3.64, m (1H)        | C1                                              | B3, B5                                       | B3, B5                                        |
| B5          | 71.2, CH              | 3.82, m (1H)        |                                                 | B4                                           | B4                                            |
| B6          | 60.7, CH <sub>2</sub> | 3.84, m (2H)        |                                                 | overlapped                                   | overlapped                                    |
| C1          | 99.5, CH              | 5.40, d (3.5, 1H)   | C2, C3, C5                                      | C2                                           | C2, C3, C5                                    |
| C2          | 71.5, CH              | 3.60, m (1H)        |                                                 | C1, C3                                       | C1, C3                                        |
| C3          | 73.2, CH              | 3.95, m (1H)        |                                                 | C2, C4                                       | C2, C4                                        |
| C4          | 77.0, CH              | 3.64, m (1H)        | D1                                              | C3, C5                                       | C3, C5                                        |
| C5          | 71.2, CH              | 3.82, m (1H)        |                                                 | C4                                           | C4                                            |
| C6          | 60.8, CH <sub>2</sub> | 3.84, m (2H)        |                                                 | overlapped                                   | overlapped                                    |
| D1          | 99.6, CH              | 5.40, d (3.5, 1H)   | D2, D3, D5                                      | D2                                           | D2, D3, D5                                    |
| D2          | 71.1, CH              | 3.63, m (1H)        |                                                 | D1, D3                                       | D1, D3                                        |
| D3          | 73.2, CH              | 3.94, m (1H)        |                                                 | D2                                           | D2                                            |
| D4          | 77.9, CH              | 3.63, m (1H)        | E1                                              | D3, D5                                       | D3, D5                                        |

|     |                       |                          |                |              |                |
|-----|-----------------------|--------------------------|----------------|--------------|----------------|
| D5  | 68.9, CH              | 4.04, d (12.0, 1H)       |                | D4, D6a, D6b | D4, D6a, D6b   |
| D6a |                       | 4.22, m (1H)             |                | D5, D6b      | D5, D6b        |
| D6b | 64.3, CH <sub>2</sub> | 4.45, dd (12.0, 3.0, 1H) |                | D5, D6a      | D5, D6a        |
| E1  | 100.5, CH             | 5.28, d (3.4, 1H)        | E3, E5         | E2           | E2, E3, E4     |
| E2  | 71.3, CH              | 3.53, m (1H)             |                | E1, E3       | E1, E3         |
| E3  | 72.9, CH              | 3.58, m (1H)             |                | E2, E4       | E1, E2, E4, E6 |
| E4  | 64.9, CH              | 2.45, t (9.0, 1H)        | E3, E5, E6, F1 | E3, E5       | E3, E5, E6     |
| E5  | 69.8, CH              | 3.73, m (1H)             |                | E4, E6       | E4, E6         |
| E6  | 17.4, CH <sub>3</sub> | 1.30, d (6.0, 3H)        | E4, E5         | E5           | E4, E5         |
| F1  | 55.0, CH              | 3.53, m (1H)             | F2, F5         | F2, F7       | F2, F7         |
| F2  | 69.7, CH              | 3.79, m (1H)             |                | F1, F3       | F1, F3         |
| F3  | 70.8, CH              | 4.13, m (1H)             |                | F2, F4       | F2, F4         |
| F4  | 76.2, CH              | 4.22, m (1H)             | G1             | F3           | F3             |
| F5  | 136.5, C              |                          |                |              |                |
| F6a |                       | 4.13, m (1H)             |                | F6b          | F6b            |
| F6b | 62.0, CH <sub>2</sub> | 4.22, m (1H)             |                | F6a          | F6a            |
| F7  | 126.3, CH             | 5.97, d (3.2, 1H)        | F2, F6         | F1           | F1, F2, F6b    |
| G1  | 97.6, CH              | 5.37, d (3.6, 1H)        | G3, G5         | G2           | G2, G5         |
| G2  | 71.5, CH              | 3.63, m (1H)             |                | G1, G3       | G1, G3         |
| G3  | 73.5, CH              | 3.92, m (1H)             |                | G2           | G2             |
| G4  | 70.8, CH              | 3.63, m (1H)             | H1             | G3           | G3             |
| G5  | 71.1, CH              | 3.92, m (1H)             |                | G4, G6       | G4, G6         |
| G6  | 63.4, CH <sub>2</sub> | 3.86, m (2H)             |                | G5           | G5             |
| H1  | 99.9, CH              | 5.32, d (3.4, 1H)        | H3, H5         | H2           | H2, H4, H5     |
| H2  | 71.6, CH              | 3.61, m (1H)             |                | H1, H3       | H1, H3         |
| H3  | 72.5, CH              | 3.65, m (1H)             |                | H2, H4       | H1, H2, H4, H6 |
| H4  | 64.9, CH              | 2.45, t (9.0, 1H)        | H3, H5, H6     | H3, H5       | H3, H5, H6     |
| H5  | 69.6, CH              | 3.78, m (1H)             |                | H4, H6       | H4, H6         |
| H6  | 17.3, CH <sub>3</sub> | 1.34, d (6.0, 3H)        | H4, H5         | H5           | H2, H4, H5     |
| I1  | 56.0, CH              | 3.53, m (1H)             | I2, I6         | I2, I7       | I2, I7         |
| I2  | 72.7, CH              | 3.66, m (1H)             |                | I1, I3       | I1, I3         |
| I3  | 72.9, CH              | 3.78, m (1H)             |                | I2, I4       | I2, I4         |
| I4  | 70.9, CH              | 4.04, d (12.0, 1H)       |                | I3           | I3             |
| I5  | 138.9, C              |                          |                |              |                |
| I6a |                       | 4.13, m (1H)             |                | I6b          | I6b            |
| I6b | 61.6, CH <sub>2</sub> | 4.22, m (1H)             |                | I6a          | I6a            |
| I7  | 123.8, CH             | 5.90, d (3.4, 1H)        | I1, I2, I6     | I1           | I1, I6a, I6b   |
| 1'  | 176.7, C=O            |                          |                |              |                |
| 2'  | 35.6, CH <sub>2</sub> | 2.45, m (2H)             | 1', 3', 4'     | 3'b          | 3'b, 4'        |
| 3'a |                       | 1.18, m (1H)             | 2'             |              | 2'             |
| 3'b | 17.9, CH <sub>2</sub> | 1.65, m (1H)             | 1', 2', 4'     | 2', 4'       | 2', 4'         |
| 4'  | 12.9, CH <sub>3</sub> | 0.94, t (7.2, 3H)        | 2', 3'         | 3'b          | 2', 3'b        |

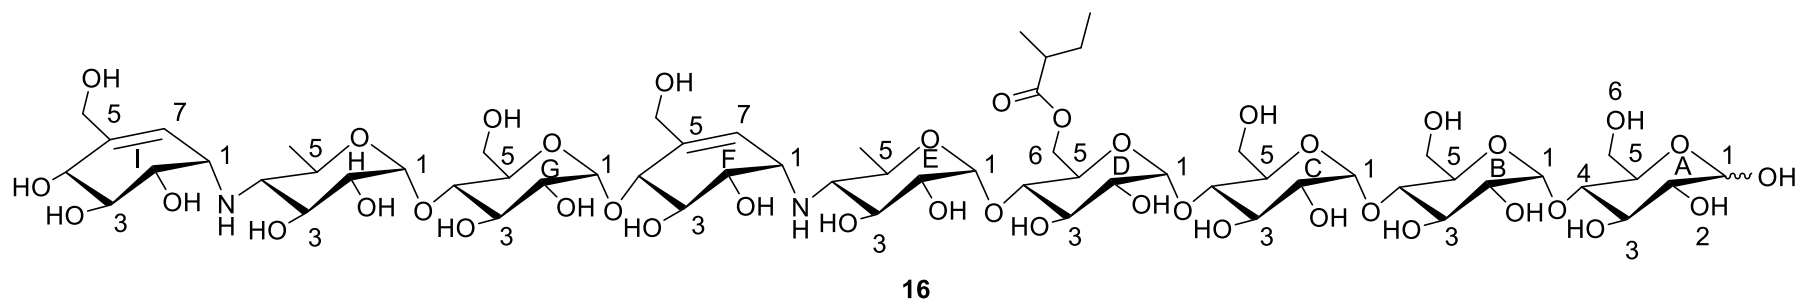

**Table S9.**  $^1\text{H}$  (500 MHz) and  $^{13}\text{C}$  (125 MHz) NMR data of **16** ( $\delta$ ppm) in  $\text{D}_2\text{O}$ .

| No.         | $\delta_{\text{C}}$   | $\delta_{\text{H}}$ | HMBC ( $^1\text{H} \rightarrow ^{13}\text{C}$ ) | COSY ( $^1\text{H} \rightarrow ^1\text{H}$ ) | TOCSY ( $^1\text{H} \rightarrow ^1\text{H}$ ) |
|-------------|-----------------------|---------------------|-------------------------------------------------|----------------------------------------------|-----------------------------------------------|
| A1 $\alpha$ | 91.9, CH              | 5.21, d (3.5, 1H)   | A2 $\alpha$ , A5 $\alpha$                       | A2 $\alpha$                                  | A2 $\alpha$ , A5 $\alpha$                     |
| A2 $\alpha$ | 71.3, CH              | 3.50, m (1H)        |                                                 | A1 $\alpha$ , A3 $\alpha$                    | A1 $\alpha$ , A3 $\alpha$                     |
| A3 $\alpha$ | 73.3, CH              | 3.92, m (1H)        |                                                 | A2 $\alpha$ , A4 $\alpha$                    | A2 $\alpha$ , A4 $\alpha$                     |
| A4 $\alpha$ | 76.8, CH              | 3.64, m (1H)        | B1                                              | A3 $\alpha$ , A5 $\alpha$                    | A3 $\alpha$ , A5 $\alpha$                     |
| A5 $\alpha$ | 69.9, CH              | 3.84, m (1H)        |                                                 | A4 $\alpha$ , A6 $\alpha$ ,                  | A4 $\alpha$ , A6 $\alpha$ ,                   |
| A6 $\alpha$ | 60.4, CH <sub>2</sub> | 3.78, m (2H)        |                                                 | A5 $\alpha$                                  | A5 $\alpha$                                   |
| A1 $\beta$  | 95.8, CH              | 4.63, d (8.0, 1H)   | A2 $\beta$ , A3 $\beta$                         | A2 $\beta$                                   | A3 $\beta$ , A5 $\beta$                       |
| A2 $\beta$  | 74.0, CH              | 3.25, m (1H)        |                                                 | A1 $\beta$ , A3 $\beta$                      | A1 $\beta$ , A3 $\beta$                       |
| A3 $\beta$  | 76.2, CH              | 3.73, m (1H)        |                                                 | A2 $\beta$ , A4 $\beta$                      | A2 $\beta$ , A4 $\beta$                       |
| A4 $\beta$  | 76.8, CH              | 3.64, m (1H)        | B1                                              | A3 $\beta$ , A5 $\beta$                      | A3 $\beta$ , A5 $\beta$                       |
| A5 $\beta$  | 74.5, CH              | 3.61, m (1H)        |                                                 | A4 $\beta$ , A6 $\beta$                      | A4 $\beta$ , A6 $\beta$                       |
| A6 $\beta$  | 60.4, CH <sub>2</sub> | 3.88, m (2H)        |                                                 | A5 $\beta$                                   | A5 $\beta$                                    |
| B1          | 99.4, CH              | 5.38, d (3.5, 1H)   | B2, B4, B5                                      | B2                                           | B2, B3, B5                                    |
| B2          | 71.6, CH              | 3.59, m (1H)        |                                                 | B1, B3                                       | B1, B3                                        |
| B3          | 73.2, CH              | 3.94, m (1H)        |                                                 | B2, B4                                       | B2, B4                                        |
| B4          | 77.0, CH              | 3.64, m (1H)        | C1                                              | B3, B5                                       | B3, B5                                        |
| B5          | 71.2, CH              | 3.82, m (1H)        |                                                 | B4                                           | B4                                            |
| B6          | 60.5, CH <sub>2</sub> | 3.82, m (2H)        |                                                 | overlapped                                   | overlapped                                    |
| C1          | 99.5, CH              | 5.38, d (3.5, 1H)   | C2, C4, C5                                      | C2                                           | C2, C3, C5                                    |
| C2          | 71.5, CH              | 3.59, m (1H)        |                                                 | C1, C3                                       | C1, C3                                        |
| C3          | 73.3, CH              | 3.94, m (1H)        |                                                 | C2, C4                                       | C2, C4                                        |
| C4          | 76.9, CH              | 3.64, m (1H)        | D1                                              | C3, C5                                       | C3, C5                                        |
| C5          | 71.2, CH              | 3.82, m (1H)        |                                                 | C4                                           | C4                                            |
| C6          | 60.7, CH <sub>2</sub> | 3.82, m (2H)        |                                                 | overlapped                                   | overlapped                                    |
| D1          | 99.6, CH              | 5.38, d (3.5, 1H)   | D2, D4, D5                                      | D2                                           | D2, D3, D5                                    |
| D2          | 71.1, CH              | 3.64, m (1H)        |                                                 | D1, D3                                       | D1, D3                                        |
| D3          | 73.1, CH              | 3.93, m (1H)        |                                                 | D2                                           | D2                                            |
| D4          | 78.4, CH              | 3.64, m (1H)        | E1                                              | D3, D5                                       | D3, D5                                        |

|     |                       |                    |                |              |                  |
|-----|-----------------------|--------------------|----------------|--------------|------------------|
| D5  | 69.0, CH              | 4.01, d (12.0, 1H) |                | D4, D6a, D6b | D4, D6a, D6b     |
| D6a | 63.4, CH <sub>2</sub> | 4.19, m (1H)       |                | D5, D6b      | D5, D6b          |
| D6b |                       | 4.43, d (12.0, 1H) |                | D5, D6a      | D5, D6a          |
| E1  | 100.7, CH             | 5.24, d (3.5, 1H)  | E3, E5         | E2           | E2, E3, E4       |
| E2  | 71.3, CH              | 3.50, m (1H)       |                | E1, E3       | E1, E3           |
| E3  | 72.9, CH              | 3.52, m (1H)       |                | E2, E4       | E1, E2, E4       |
| E4  | 64.3, CH              | 2.43, t (9.0, 1H)  | E3, E5, E6, F1 | E3, E5       | E3, E5, E6       |
| E5  | 69.7, CH              | 3.71, m (1H)       |                | E4, E6       | E4, E6           |
| E6  | 17.4, CH <sub>3</sub> | 1.29, d (5.6, 3H)  | E4, E5         | E5           | E4, E5           |
| F1  | 55.0, CH              | 3.45, m (1H)       | F2, F5         | F2, F7       | F2, F7           |
| F2  | 69.7, CH              | 3.76, m (1H)       |                | F1, F3       | F1, F3           |
| F3  | 70.8, CH              | 4.09, m (1H)       |                | F2, F4       | F2, F4           |
| F4  | 76.3, CH              | 4.19, m (1H)       | G1             | F3           | F3               |
| F5  | 136.5, C              |                    |                |              |                  |
| F6a |                       | 4.09, m (1H)       |                | F6b          | F6b              |
| F6b | 62.0, CH <sub>2</sub> | 4.19, m (1H)       |                | F6a          | F6a              |
| F7  | 126.6, CH             | 5.94, d (3.1, 1H)  | F2, F6         | F1           | F1, F2, F6b      |
| G1  | 97.5, CH              | 5.34, d (3.5, 1H)  | G3, G5         | G2           | G2, G5           |
| G2  | 71.7, CH              | 3.58, m (1H)       |                | G1, G3       | G1, G3           |
| G3  | 73.5, CH              | 3.89, m (1H)       |                | G2           | G2               |
| G4  | 70.8, CH              | 3.59, m (1H)       | H1             | G3           | G3               |
| G5  | 71.1, CH              | 3.89, m (1H)       |                | G4, G6       | G4, G6           |
| G6  | 62.5, CH <sub>2</sub> | 3.83, m (2H)       |                | G5           | G5               |
| H1  | 99.9, CH              | 5.30, d (3.4, 1H)  | H3, H5         | H2           | H2, H4, H5       |
| H2  | 71.5, CH              | 3.57, m (1H)       |                | H1           | H1               |
| H3  | 72.6, CH              | 3.57, m (1H)       |                | H4           | H1, H4, H6       |
| H4  | 64.9, CH              | 2.43, t (9.0, 1H)  | H3, H5, H6     | H3, H5       | H3, H5, H6       |
| H5  | 69.6, CH              | 3.73, m (1H)       |                | H4, H6       | H4, H6           |
| H6  | 17.3, CH <sub>3</sub> | 1.30, d (5.6, 3H)  | H4, H5         | H5           | H2, H4, H5       |
| I1  | 56.0, CH              | 3.45, m (1H)       | I2, I6         | I2, I7       | I2, I7           |
| I2  | 72.7, CH              | 3.63, m (1H)       |                | I1, I3       | I1, I3           |
| I3  | 72.9, CH              | 3.73, m (1H)       |                | I2, I4       | I2, I4           |
| I4  | 70.9, CH              | 4.01, d (12.0, 1H) |                | I3           | I3               |
| I5  | 138.9, C              |                    |                |              |                  |
| I6a |                       | 4.09, m (1H)       |                | I6b          | I6b              |
| I6b | 61.6, CH <sub>2</sub> | 4.19, m (1H)       |                | I6a          | I6a              |
| I7  | 123.8, CH             | 5.87, d (3.5, 1H)  | I1, I2, I6     | I1           | I1, I6a, I6b     |
| 1'  | 179.8, C=O            |                    |                |              |                  |
| 2'  | 40.9, CH              | 2.52, m (1H)       | 3', 4', 5'     | 3'b, 5'      | 3'a, 3'b, 4', 5' |
| 3'a |                       | 1.51, m (1H)       | 2', 4', 5'     | 4'           | 2', 3'b, 4', 5'  |
| 3'b | 26.4, CH <sub>2</sub> | 1.63, m (1H)       | 2', 4', 5'     | 2', 4'       | 2', 3'a, 4', 5'  |
| 4'  | 10.9, CH <sub>3</sub> | 0.88, t (7.0, 3H)  | 2', 3'         | 3'a, 3'b     | 3'a, 3'b, 5'     |
| 5'  | 15.7, CH <sub>3</sub> | 1.13, d (7.0, 3H)  | 2', 3'         | 2'           | 2', 4'           |

**Table S10.** Acarviostatins with glucose(s) at the reducing terminus (Aca-glu) from *Streptomyces* sp. HO1518.

| No. | Compounds                 | Formula                                                         | $\Delta$ (ppm) | $t_R$ (min) | $[M + H]^+$ | Characterized fragment ions              | Ref. |
|-----|---------------------------|-----------------------------------------------------------------|----------------|-------------|-------------|------------------------------------------|------|
| 1   | Aca I01                   | C <sub>25</sub> H <sub>43</sub> NO <sub>18</sub>                | 0.2            | 6.00        | 646.2553    | 304.1392, 646.2554                       | 1    |
| 2   | Aca I02                   | C <sub>31</sub> H <sub>53</sub> NO <sub>23</sub>                | 1.7            | 6.14        | 808.3081    | 304.1395, 808.3095                       | 2    |
| 3   | Aca I03 ( <b>17</b> )     | C <sub>37</sub> H <sub>63</sub> NO <sub>28</sub>                | 0.1            | 6.55        | 970.3609    | 304.1397, 970.3610                       | 3    |
| 4   | Aca II00                  | C <sub>38</sub> H <sub>64</sub> N <sub>2</sub> O <sub>25</sub>  | 1.4            | 6.82        | 949.3871    | 304.1398, 769.3251, 949.3884             | 4    |
| 5   | Aca II01                  | C <sub>44</sub> H <sub>74</sub> N <sub>2</sub> O <sub>30</sub>  | −0.4           | 6.93        | 1111.4399   | 304.1401, 769.3245, 808.3090, 1111.4395  | 5    |
| 6   | Aca II02 ( <b>10</b> )    | C <sub>50</sub> H <sub>84</sub> N <sub>2</sub> O <sub>35</sub>  | 0.2            | 7.81        | 1273.4927   | 304.1394, 769.3244, 970.3609, 1273.4929  | —    |
| 7   | Aca II03 ( <b>9</b> )     | C <sub>56</sub> H <sub>94</sub> N <sub>2</sub> O <sub>40</sub>  | −2.0           | 9.27        | 1435.5456   | 304.1386, 769.3219, 1132.4094, 1435.5427 | 3    |
| 8   | Aca II04                  | C <sub>62</sub> H <sub>104</sub> N <sub>2</sub> O <sub>45</sub> | 0.1            | 7.74        | 1597.5984   | 304.1389, 769.3233, 1294.4610, 1597.5986 | —    |
| 9   | Aca II05                  | C <sub>68</sub> H <sub>114</sub> N <sub>2</sub> O <sub>50</sub> | −1.2           | 9.18        | 1759.6512   | 304.1389, 769.3233, 1759.6491            | —    |
| 10  | Ac-Aca I01                | C <sub>27</sub> H <sub>45</sub> NO <sub>19</sub>                | −0.1           | 10.71       | 688.2659    | 304.1396, 688.2658                       | —    |
| 11  | Ac-Aca I02                | C <sub>33</sub> H <sub>55</sub> NO <sub>24</sub>                | −1.9           | 10.93       | 850.3187    | 304.1393, 850.3171                       | —    |
| 12  | Ac-Aca I03 ( <b>1</b> )   | C <sub>39</sub> H <sub>65</sub> NO <sub>29</sub>                | −1.2           | 10.99       | 1012.3715   | 304.1395, 1012.3703                      | 6    |
| 13  | Ac-Aca II01               | C <sub>46</sub> H <sub>76</sub> N <sub>2</sub> O <sub>31</sub>  | −0.5           | 10.31       | 1153.4505   | 304.1392, 769.3233, 850.3168, 1153.4499  | —    |
| 14  | Ac-Aca II02               | C <sub>52</sub> H <sub>86</sub> N <sub>2</sub> O <sub>36</sub>  | −1.8           | 10.80       | 1315.5033   | 304.1390, 769.3231, 1012.3683, 1315.5009 | —    |
| 15  | Ac-Aca II03 ( <b>7</b> )  | C <sub>58</sub> H <sub>97</sub> N <sub>2</sub> O <sub>41</sub>  | −1.2           | 11.11       | 1477.5561   | 304.1389, 769.3231, 1174.4232, 1477.5543 | 7    |
| 16  | Hac-Aca I03               | C <sub>39</sub> H <sub>65</sub> NO <sub>30</sub>                | −1.0           | 10.29       | 1028.3664   | 304.1391, 1028.3654                      | —    |
| 17  | Hac-Aca II03              | C <sub>58</sub> H <sub>96</sub> N <sub>2</sub> O <sub>42</sub>  | 2.4            | 11.80       | 1493.5510   | 304.1392, 769.3219, 1493.5546            | —    |
| 18  | Pr-Aca I01                | C <sub>28</sub> H <sub>47</sub> NO <sub>19</sub>                | −3.4           | 12.39       | 702.2815    | 304.1385, 702.2791                       | —    |
| 19  | Pr-Aca I02                | C <sub>34</sub> H <sub>57</sub> NO <sub>24</sub>                | −2.0           | 12.59       | 864.3343    | 304.1379, 864.3326                       | —    |
| 20  | Pr-Aca I03 ( <b>2</b> )   | C <sub>40</sub> H <sub>67</sub> NO <sub>29</sub>                | −1.0           | 13.10       | 1026.3872   | 304.1395, 1026.3862                      | 6    |
| 21  | Pr-Aca II01               | C <sub>47</sub> H <sub>78</sub> N <sub>2</sub> O <sub>31</sub>  | −0.6           | 11.63       | 1167.4661   | 304.1394, 769.3236, 864.3338, 1167.4654  | —    |
| 22  | Pr-Aca II02 ( <b>11</b> ) | C <sub>53</sub> H <sub>88</sub> N <sub>2</sub> O <sub>36</sub>  | −0.7           | 11.86       | 1329.5190   | 304.1395, 769.3233, 1026.3870, 1329.5181 | —    |
| 23  | Pr-Aca II03 ( <b>14</b> ) | C <sub>59</sub> H <sub>98</sub> N <sub>2</sub> O <sub>41</sub>  | −0.2           | 12.40       | 1491.5718   | 304.1377, 769.3239, 1188.4393, 1491.5715 | —    |
| 24  | Pr-Aca II04               | C <sub>65</sub> H <sub>108</sub> N <sub>2</sub> O <sub>46</sub> | −4.0           | 12.15       | 1653.6246   | 304.1394, 769.3229, 1653.6180            | —    |
| 25  | Pr-Aca III03              | C <sub>78</sub> H <sub>129</sub> N <sub>3</sub> O <sub>53</sub> | −2.8           | 11.95       | 1956.7564   | 304.1382, 769.3221, 1188.4364, 1956.7510 | —    |
| 26  | Hpr-Aca I02               | C <sub>34</sub> H <sub>57</sub> NO <sub>25</sub>                | −1.4           | 12.07       | 880.3292    | 304.1389, 880.3280                       | —    |
| 27  | Hpr-Aca I03               | C <sub>40</sub> H <sub>67</sub> NO <sub>30</sub>                | −2.9           | 12.81       | 1042.3821   | 304.1381, 769.3215, 1042.3791            | —    |
| 28  | Hpr-Aca II03              | C <sub>59</sub> H <sub>98</sub> N <sub>2</sub> O <sub>42</sub>  | 1.8            | 13.61       | 1507.5667   | 304.1387, 769.3211, 1204.4598, 1507.5694 | —    |
| 29  | isoBu-Aca I01             | C <sub>29</sub> H <sub>49</sub> NO <sub>19</sub>                | −0.4           | 14.14       | 716.2972    | 304.1383, 716.2969                       | —    |

|    |                     |                                                                 |      |        |           |                                          |    |
|----|---------------------|-----------------------------------------------------------------|------|--------|-----------|------------------------------------------|----|
| 30 | isoBu-Aca I02       | C <sub>35</sub> H <sub>59</sub> NO <sub>24</sub>                | -1.1 | 14.56  | 878.3500  | 304.1390, 878.3490                       | -  |
| 31 | isoBu-Aca I03 (3)   | C <sub>41</sub> H <sub>69</sub> NO <sub>29</sub>                | 0.6  | 15.43  | 1040.4028 | 304.1481, 1040.4034                      | 7  |
| 32 | Bu-Aca I03 (18)     | C <sub>41</sub> H <sub>69</sub> NO <sub>29</sub>                | -0.1 | 15.53  | 1040.4028 | 304.1391, 1040.4027                      | 8  |
| 33 | Bu-Aca II01         | C <sub>48</sub> H <sub>80</sub> N <sub>2</sub> O <sub>31</sub>  | -1.1 | 13.55  | 1181.4818 | 304.1380, 769.3232, 878.3489, 1181.4805  | 8  |
| 34 | isoBu-Aca II02 (12) | C <sub>54</sub> H <sub>90</sub> N <sub>2</sub> O <sub>36</sub>  | -2.9 | 13.75  | 1343.5346 | 304.1386, 769.3255, 1040.4000, 1343.5307 | -  |
| 35 | isoBu-Aca II03 (8)  | C <sub>60</sub> H <sub>100</sub> N <sub>2</sub> O <sub>41</sub> | 0.2  | 14.40  | 1505.5874 | 304.1391, 769.3228, 1202.4547, 1505.5877 | 7  |
| 36 | Bu-Aca II03 (15)    | C <sub>60</sub> H <sub>100</sub> N <sub>2</sub> O <sub>41</sub> | 2.2  | 14.48  | 1505.5874 | 304.1392, 769.3238, 1202.4570, 1505.5907 | -  |
| 37 | isoBu-Aca II04      | C <sub>66</sub> H <sub>110</sub> N <sub>2</sub> O <sub>46</sub> | -3.8 | 15.76  | 1667.6403 | 304.1392, 769.3230, 1667.6339            | -  |
| 38 | Hbu-Aca I01         | C <sub>29</sub> H <sub>49</sub> NO <sub>20</sub>                | -2.4 | 9.71   | 732.2921  | 304.1383, 732.2903                       | -  |
| 39 | Hbu-Aca I02         | C <sub>35</sub> H <sub>59</sub> NO <sub>25</sub>                | -0.3 | 10.15  | 894.3449  | 304.1397, 894.3446                       | -  |
| 40 | Hbu-Aca I03 (4)     | C <sub>41</sub> H <sub>70</sub> NO <sub>30</sub>                | -3.2 | 11.31  | 1056.3977 | 304.1386, 1056.3943                      | 6  |
| 41 | Hbu-Aca II01        | C <sub>48</sub> H <sub>80</sub> N <sub>2</sub> O <sub>32</sub>  | -2.4 | 10.35  | 1197.4767 | 304.1392, 769.3224, 894.3440, 1197.4738  | -  |
| 42 | Hbu-Aca II02        | C <sub>54</sub> H <sub>90</sub> N <sub>2</sub> O <sub>37</sub>  | -1.2 | 10.49  | 1359.5295 | 304.1382, 769.3230, 1056.3944, 1359.5279 | -  |
| 43 | Hbu-Aca II03 (19)   | C <sub>60</sub> H <sub>100</sub> N <sub>2</sub> O <sub>42</sub> | -0.8 | 10.85  | 1521.5823 | 304.1383, 769.3228, 1218.4477, 1521.5810 | 6  |
| 44 | isoVa-Aca I01       | C <sub>30</sub> H <sub>51</sub> NO <sub>19</sub>                | -1.6 | 15.83  | 730.3128  | 304.1385, 730.3116                       | -  |
| 45 | isoVa-Aca I02       | C <sub>36</sub> H <sub>61</sub> NO <sub>24</sub>                | -0.4 | 16.78  | 892.3656  | 304.1408, 892.3660                       | -  |
| 46 | Mbu-Aca I03 (5)     | C <sub>42</sub> H <sub>71</sub> NO <sub>29</sub>                | -1.1 | 17.93` | 1054.4184 | 304.1388, 1054.4172                      | 7  |
| 47 | isoVa-Aca I03 (6)   | C <sub>42</sub> H <sub>71</sub> NO <sub>29</sub>                | 1.5  | 18.04  | 1054.4184 | 304.1388, 1054.4200                      | 9  |
| 48 | isoVa-Aca II01      | C <sub>49</sub> H <sub>82</sub> N <sub>2</sub> O <sub>30</sub>  | -2.4 | 14.91  | 1195.4974 | 304.1300, 769.3226, 1195.4945            | -  |
| 49 | isoVa-Aca II02 (13) | C <sub>55</sub> H <sub>92</sub> N <sub>2</sub> O <sub>36</sub>  | 0.1  | 16.06  | 1357.5503 | 304.1390, 769.3219, 1054.4195, 1357.5505 | -  |
| 50 | Mbu-Aca II03 (16)   | C <sub>61</sub> H <sub>102</sub> N <sub>2</sub> O <sub>41</sub> | 0.6  | 16.65  | 1519.6031 | 304.1391, 769.3234, 1216.4712, 1519.6040 | -  |
| 51 | isoVa-Aca II03 (20) | C <sub>61</sub> H <sub>102</sub> N <sub>2</sub> O <sub>41</sub> | 0.6  | 16.79  | 1519.6031 | 304.1389, 769.3226, 1216.4704, 1519.6041 | 10 |
| 52 | Hva-Aca I01         | C <sub>30</sub> H <sub>51</sub> NO <sub>20</sub>                | 1.6  | 10.90  | 746.3077  | 304.1378, 746.3089                       | -  |
| 53 | Hva-Aca I02         | C <sub>36</sub> H <sub>61</sub> NO <sub>25</sub>                | -4.5 | 11.93  | 908.3605  | 304.1369, 908.3564                       | -  |
| 54 | Hva-Aca I03         | C <sub>42</sub> H <sub>71</sub> NO <sub>30</sub>                | -1.8 | 13.08  | 1070.4134 | 304.1372, 1070.4115                      | -  |
| 55 | He-Aca I01          | C <sub>31</sub> H <sub>53</sub> NO <sub>19</sub>                | -0.7 | 17.50  | 744.3285  | 304.1377, 744.3280                       | -  |
| 56 | He-Aca I02          | C <sub>37</sub> H <sub>63</sub> NO <sub>24</sub>                | -1.3 | 19.34  | 906.3813  | 304.1379, 906.3801                       | -  |
| 57 | He-Aca I03          | C <sub>43</sub> H <sub>73</sub> NO <sub>29</sub>                | -1.1 | 21.06  | 1068.4341 | 304.1378, 1068.4329                      | -  |
| 58 | He-Aca II02         | C <sub>56</sub> H <sub>94</sub> N <sub>2</sub> O <sub>36</sub>  | -3.4 | 18.04  | 1371.5659 | 304.1392, 769.3182, 1371.5612            | -  |
| 59 | He-Aca II03         | C <sub>62</sub> H <sub>104</sub> N <sub>2</sub> O <sub>41</sub> | -3.9 | 19.55  | 1533.6187 | 304.1379, 769.3215, 1230.4826, 1533.6127 | -  |
| 60 | Hhe-Aca I03         | C <sub>43</sub> H <sub>73</sub> NO <sub>30</sub>                | -1.3 | 18.97  | 1084.4290 | 304.1396, 1084.4276                      | -  |
| 61 | Hhe-Aca II01        | C <sub>50</sub> H <sub>84</sub> N <sub>2</sub> O <sub>32</sub>  | 0.7  | 17.80  | 1225.5080 | 304.1394, 769.3238, 922.3765, 1225.5089  | -  |

|    |               |                                                                |      |       |           |                                          |   |
|----|---------------|----------------------------------------------------------------|------|-------|-----------|------------------------------------------|---|
| 62 | Hhe-Aca II02  | C <sub>56</sub> H <sub>94</sub> N <sub>2</sub> O <sub>37</sub> | −0.2 | 17.93 | 1387.5608 | 304.1392, 769.3233, 1084.4272, 1387.5605 | – |
| 63 | diHva-Aca I03 | C <sub>42</sub> H <sub>71</sub> NO <sub>31</sub>               | −3.4 | 8.96  | 1086.4083 | 304.1390, 1086.4046                      | – |

Aca, acarviostatin; Ac, acetyl; Hac, hydroxyacetyl; Pr, propionyl; Hpr, hydroxypropionyl; Bu, butyryl; isoBu, isobutyryl; Hbu, hydroxybutyryl; Mbu, 2-methyl-butyl; isoVa, isovaleryl; Hva, hydroxyvaleryl; He, hexanoyl; Hhe, hydroxyhexanoyl; diHva, dihydroxyvaleryl. Acarviostatins, marked with “–” in Ref. column, are potential new compounds.

**Table S11.** Acarviostatins with glucose(s) at the reducing and nonreducing terminus (glu-Aca-glu) from *Streptomyces* sp. HO1518<sup>a</sup>.

| No. | Compounds     | Formula                                                        | Δ (ppm) | t <sub>R</sub> (min) | [M + H] <sup>+</sup> | Characterized fragment ions              |
|-----|---------------|----------------------------------------------------------------|---------|----------------------|----------------------|------------------------------------------|
| 1   | Aca I13       | C <sub>43</sub> H <sub>73</sub> NO <sub>33</sub>               | −0.7    | 6.80                 | 1132.4138            | 466.1933, 1132.4130                      |
| 2   | Ac-Aca I10    | C <sub>27</sub> H <sub>45</sub> NO <sub>19</sub>               | 1.6     | 10.34                | 688.2659             | 466.1900, 688.2670                       |
| 3   | Ac-Aca I12    | C <sub>39</sub> H <sub>65</sub> NO <sub>29</sub>               | −1.7    | 10.19                | 1012.3715            | 466.1918, 1012.3698                      |
| 4   | Ac-Aca I13    | C <sub>45</sub> H <sub>75</sub> NO <sub>34</sub>               | −1.1    | 10.50                | 1174.4243            | 466.1921, 1174.4230                      |
| 5   | Ac-Aca II11   | C <sub>52</sub> H <sub>86</sub> N <sub>2</sub> O <sub>36</sub> | 0.2     | 10.30                | 1315.5033            | 466.1922, 850.3170, 931.3730, 1315.5035  |
| 6   | Pr-Aca I10    | C <sub>28</sub> H <sub>47</sub> NO <sub>19</sub>               | 1.1     | 12.09                | 702.2815             | 466.1920, 702.2823                       |
| 7   | Pr-Aca I13    | C <sub>46</sub> H <sub>77</sub> NO <sub>34</sub>               | −1.3    | 12.20                | 1188.4400            | 466.1915, 1188.4384                      |
| 8   | Hpr-Aca II12  | C <sub>59</sub> H <sub>98</sub> N <sub>2</sub> O <sub>42</sub> | −1.6    | 11.83                | 1507.5667            | 466.1921, 1042.3769, 931.3743, 1507.5642 |
| 9   | Bu-Aca I13    | C <sub>47</sub> H <sub>79</sub> NO <sub>34</sub>               | −1.7    | 13.44                | 1202.4556            | 466.1910, 1202.4536                      |
| 10  | Hbu-Aca I10   | C <sub>29</sub> H <sub>49</sub> NO <sub>20</sub>               | −1.8    | 9.45                 | 732.2921             | 466.1920, 732.2908                       |
| 11  | Hbu-Aca I12   | C <sub>41</sub> H <sub>70</sub> NO <sub>30</sub>               | −0.5    | 10.13                | 1056.3977            | 466.1916, 1056.3972                      |
| 12  | Hbu-Aca I13   | C <sub>47</sub> H <sub>79</sub> NO <sub>35</sub>               | −0.6    | 10.02                | 1218.4505            | 466.1920, 1218.4498                      |
| 13  | Hbu-Aca II10  | C <sub>48</sub> H <sub>80</sub> N <sub>2</sub> O <sub>32</sub> | −2.0    | 9.97                 | 1197.4767            | 466.1919, 931.3626, 1197.4743            |
| 14  | isoVa-Aca I13 | C <sub>48</sub> H <sub>81</sub> NO <sub>34</sub>               | −2.0    | 15.10                | 1216.4713            | 466.1908, 1216.4688                      |
| 15  | Hva-Aca I11   | C <sub>36</sub> H <sub>61</sub> NO <sub>25</sub>               | −2.3    | 11.34                | 908.3605             | 466.1902, 908.3584                       |

Aca, acarviostatin; Ac, acetyl; Pr, propionyl; Hpr, hydroxypropionyl; Hbu, hydroxybutyryl; Hva, hydroxyvaleryl. <sup>a</sup> all isolates are potential new compounds.



**Table S12.** Acarviostatins with an incomplete pseudo-trisaccharide at the nonreducing terminus (incAca-glu) from *Streptomyces* sp. HO1518<sup>a</sup>.

| No. | Compounds         | Formula                                                        | $\Delta$ (ppm) | $t_R$ (min) | $[M + H]^+$ | Characterized fragment ions              |
|-----|-------------------|----------------------------------------------------------------|----------------|-------------|-------------|------------------------------------------|
| 1   | Aca I(−1)2        | C <sub>30</sub> H <sub>53</sub> NO <sub>24</sub>               | 0.1            | 5.90        | 812.3030    | 146.0813, 812.3031                       |
| 2   | Aca II(−1)2       | C <sub>43</sub> H <sub>74</sub> N <sub>2</sub> O <sub>31</sub> | −1.5           | 7.56        | 1115.4348   | 146.0811, 611.2658, 1115.4331            |
| 3   | Aca II(−1)3       | C <sub>49</sub> H <sub>84</sub> N <sub>2</sub> O <sub>36</sub> | −2.0           | 8.94        | 1277.4877   | 146.0804, 611.2647, 1277.4851            |
| 4   | Ac-Aca I(−1)3     | C <sub>32</sub> H <sub>55</sub> NO <sub>25</sub>               | −2.2           | 10.44       | 854.3136    | 146.0810, 854.3117                       |
| 5   | Ac-Aca II(−1)2    | C <sub>45</sub> H <sub>76</sub> N <sub>2</sub> O <sub>32</sub> | 2.5            | 10.23       | 1157.4454   | 146.0810, 611.2639, 1157.4483            |
| 6   | Ac-Aca II(−1)3    | C <sub>51</sub> H <sub>86</sub> N <sub>2</sub> O <sub>37</sub> | −2.2           | 10.60       | 1319.4982   | 146.0811, 611.2655, 1174.4167, 1319.4953 |
| 7   | Hac-Aca I(−1)3    | C <sub>32</sub> H <sub>55</sub> NO <sub>26</sub>               | −2.0           | 9.74        | 870.3085    | 146.0809, 870.3067                       |
| 8   | Pr-Aca I(−1)3     | C <sub>34</sub> H <sub>57</sub> NO <sub>24</sub>               | −1.3           | 12.42       | 868.3292    | 146.0811, 868.3281                       |
| 9   | Pr-Aca II(−1)2    | C <sub>46</sub> H <sub>78</sub> N <sub>2</sub> O <sub>32</sub> | 0.8            | 11.89       | 1171.4610   | 146.0809, 611.2623, 1026.3845, 1171.4600 |
| 10  | Pr-Aca II(−1)3    | C <sub>52</sub> H <sub>88</sub> N <sub>2</sub> O <sub>37</sub> | −4.4           | 12.37       | 1333.5139   | 146.0810, 611.2648, 1188.4208, 1333.5080 |
| 11  | Hpr-Aca II(−1)3   | C <sub>52</sub> H <sub>88</sub> N <sub>2</sub> O <sub>38</sub> | −1.6           | 12.50       | 1349.5088   | 146.0810, 611.2655, 1204.4326, 1349.5066 |
| 12  | Bu-Aca II(−1)2    | C <sub>47</sub> H <sub>80</sub> N <sub>2</sub> O <sub>32</sub> | 3.8            | 13.72       | 1185.4767   | 146.0800, 611.2651, 1185.4812            |
| 13  | Bu-Aca II(−1)3    | C <sub>53</sub> H <sub>90</sub> N <sub>2</sub> O <sub>37</sub> | −3.8           | 14.10       | 1347.5295   | 146.0799, 611.2649, 1202.4555, 1347.5245 |
| 14  | Hbu-Aca I(−1)3    | C <sub>34</sub> H <sub>59</sub> NO <sub>26</sub>               | −2.4           | 9.64        | 898.3398    | 146.0803, 898.3376                       |
| 15  | Hbu-Aca II(−1)2   | C <sub>47</sub> H <sub>80</sub> N <sub>2</sub> O <sub>33</sub> | −3.4           | 10.34       | 1201.4716   | 146.0812, 611.2656, 1056.3941, 1201.4675 |
| 16  | isoVa-Aca I(−1)3  | C <sub>35</sub> H <sub>61</sub> NO <sub>25</sub>               | −2.4           | 15.90       | 896.3605    | 146.0805, 896.3583                       |
| 17  | isoVa-Aca II(−1)2 | C <sub>48</sub> H <sub>82</sub> N <sub>2</sub> O <sub>32</sub> | −1.8           | 15.72       | 1199.4923   | 146.0810, 611.2651, 1054.4174, 1199.4901 |
| 18  | isoVa-Aca II(−1)3 | C <sub>54</sub> H <sub>92</sub> N <sub>2</sub> O <sub>37</sub> | 1.0            | 16.13       | 1361.5452   | 146.0810, 611.2637, 1216.4712, 1361.5465 |
| 19  | Hva-Aca II(−1)2   | C <sub>48</sub> H <sub>82</sub> N <sub>2</sub> O <sub>33</sub> | −2.4           | 11.20       | 1215.4873   | 146.0797, 611.2645, 1215.4844            |
| 20  | Hva-Aca II(−1)3   | C <sub>54</sub> H <sub>92</sub> N <sub>2</sub> O <sub>38</sub> | −3.0           | 11.41       | 1377.5401   | 146.0797, 611.2644, 1218.4834, 1377.5360 |

Aca, acarviostatin; Ac, acetyl; Hac, hydroxyacetyl; Pr, propionyl; Hpr, hydroxypropionyl; Bu, butyryl; Hbu, hydroxybutyryl; isoVa, isovaleryl; Hva, hydroxyvaleryl.

<sup>a</sup> all isolates are potential new compounds.

## References

- Schmidt, D.D.; Frommer, W.; Junge, B.; Müller, L.; Wingender, W.; Truscheit, E.; Schäfer, D.  $\alpha$ -Glucosidase inhibitors. New complex oligosaccharides of microbial origin. *Naturwissenschaften* **1977**, *64*, 535–536.

2. Fukuhara, K.; Murai, H.; Murao, S. Isolation and structure-activity relationship of some amylostatins (F-Ib Fraction) produced by *Streptomyces diastaticus* subsp *amylostaticus* No. 9410. *Agric. Biol. Chem.* **1982**, *46*, 1941–1945.
3. Geng, P.; Qiu, F.; Zhu, Y.Y.; Bai, G. Four acarviosin-containing oligosaccharides identified from *Streptomyces coelicoflavus* ZG0656 are potent inhibitors of  $\alpha$ -amylase. *Carbohydr. Res.* **2008**, *343*, 882–892.
4. Qian, M.X.; Nahoum, V.; Bonicel, J.; Bischoff, H.; Henrissat, B.; Payan, F. Enzyme-catalyzed condensation reaction in a mammalian  $\alpha$ -amylase. High resolution structural analysis of an enzymeinhibitor complex. *Biochemistry* **2001**, *40*, 7700–7709.
5. Weiss, S.C.; Skerra, A.; Schiefner, A. Structural basis for the interconversion of maltodextrins by MalQ, the amyломaltase of *Escherichia coli*. *J. Biol. Chem.* **2015**, *290*, 21352–21364.
6. Liu, H.L.; E, H.C.; Xie, D.A.; Cheng, W.B.; Tao, W.Q.; Wang, Y. Acylated aminooligosaccharides with inhibitory effects against  $\alpha$ -amylase from *Streptomyces* sp. HO1518. *Mar. Drugs* **2018**, *16*, 403.
7. Xu, J.L.; Liu, H.L.; Liu, Z.F.; Ren, Y.H.; Wang, Y. Acylated aminooligosaccharides from the yellow sea *Streptomyces* sp. HO1518 as both  $\alpha$ -glucosidase and lipase inhibitors. *Mar. Drugs* **2020**, *18*, 576.
8. Si, D.Y.; Zhong, D.F.; Xu, Q.M. Two butylated aminooligosaccharides isolated from the culture filtrate of *Streptomyces luteogriseus*. *Carbohydr. Res.* **2001**, *335*, 127–132.
9. Zhong, D.F.; Si, D.Y.; He, W.Y.; Zhao, L.M.; Xu, Q.M. Structural revision of isovalertatins M03, M13, and M23 isolated from the culture of *Streptomyces luteogriseus*. *Carbohydr. Res.* **2001**, *331*, 69–75.
10. Si, D.Y.; Zhong, D.F.; He, W.Y.; Zhao, L.M. Structural revision of isovalertatins D03 and D23 isolated from the culture filtrate of *Streptomyces luteogriseus*. *Chin. Chem. Lett.* **2001**, *12*, 327–330.

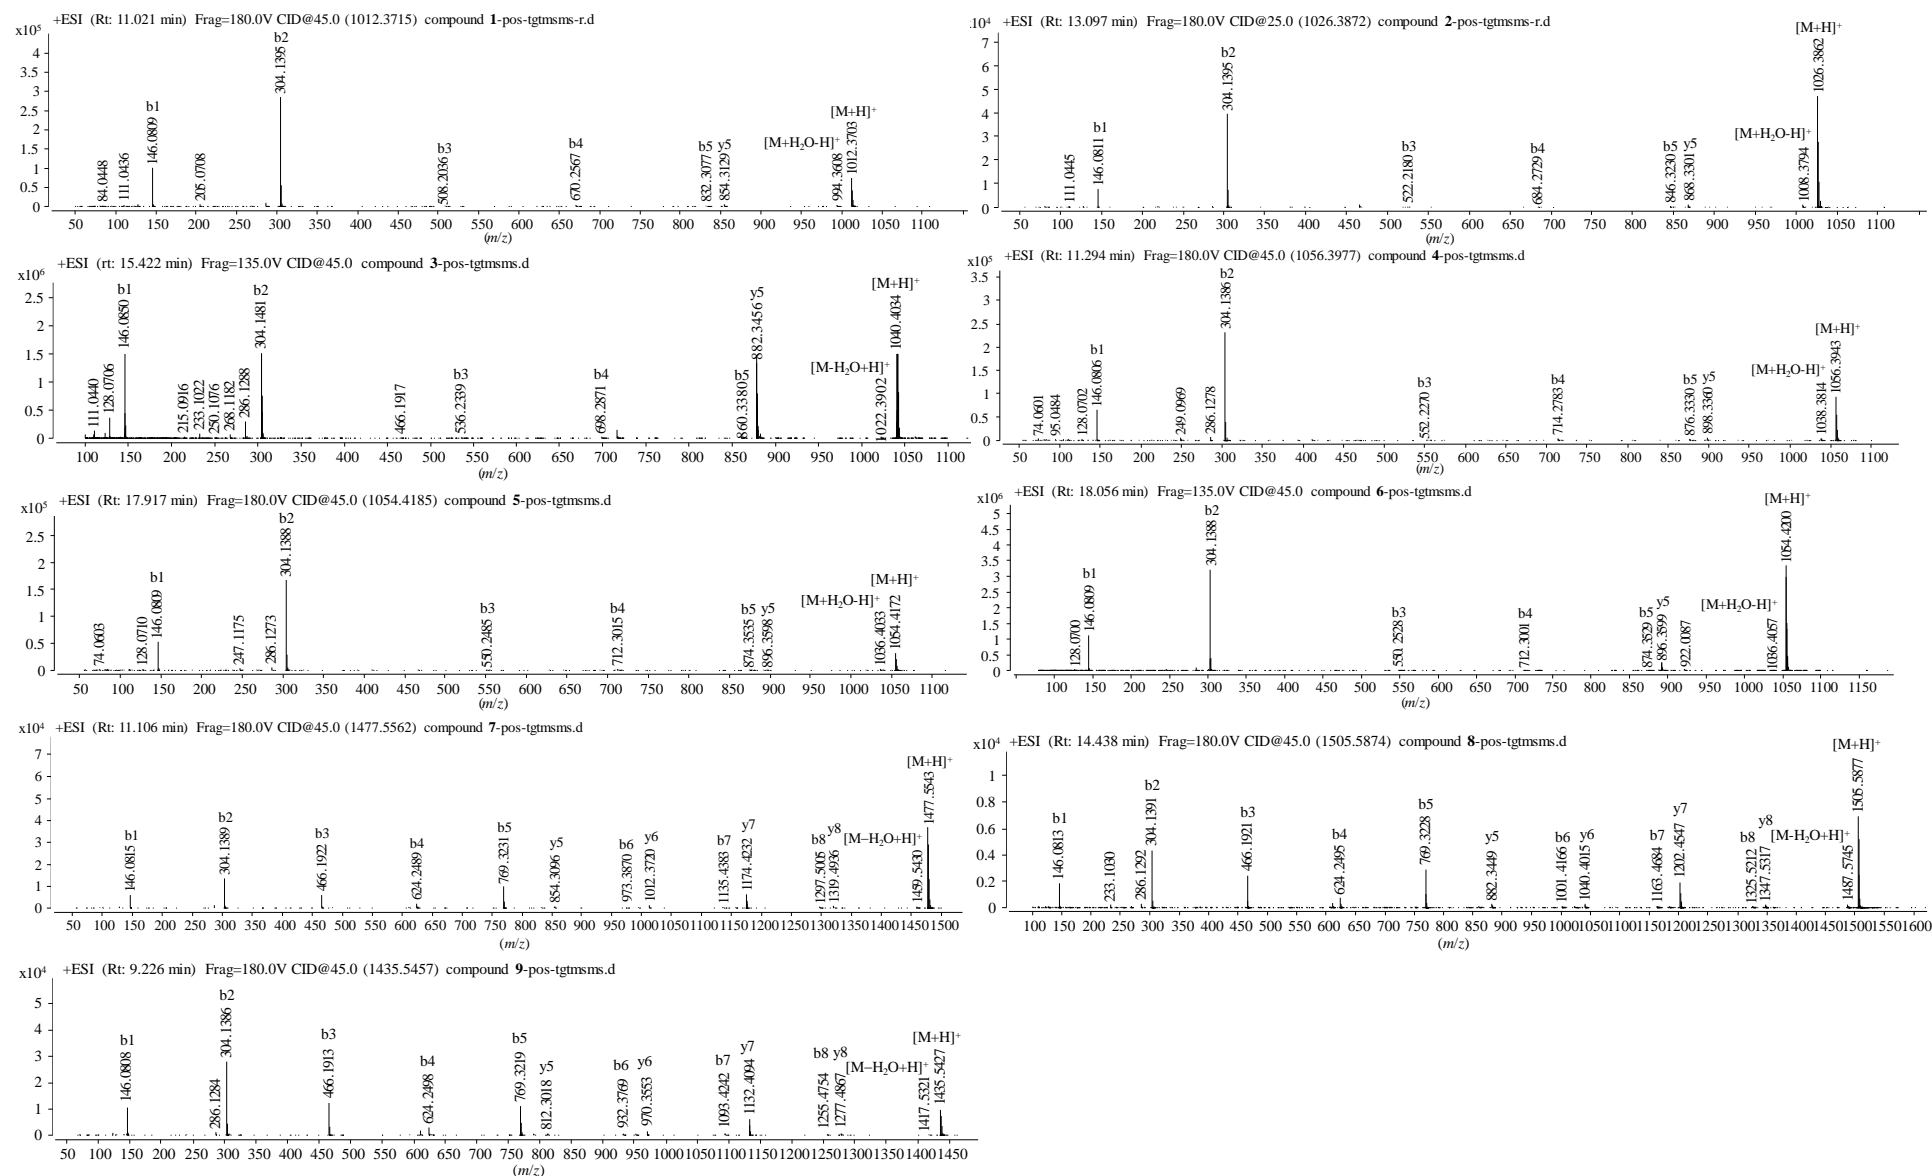

Figure S1. HRESI-MS/MS spectra of compounds 1-9.

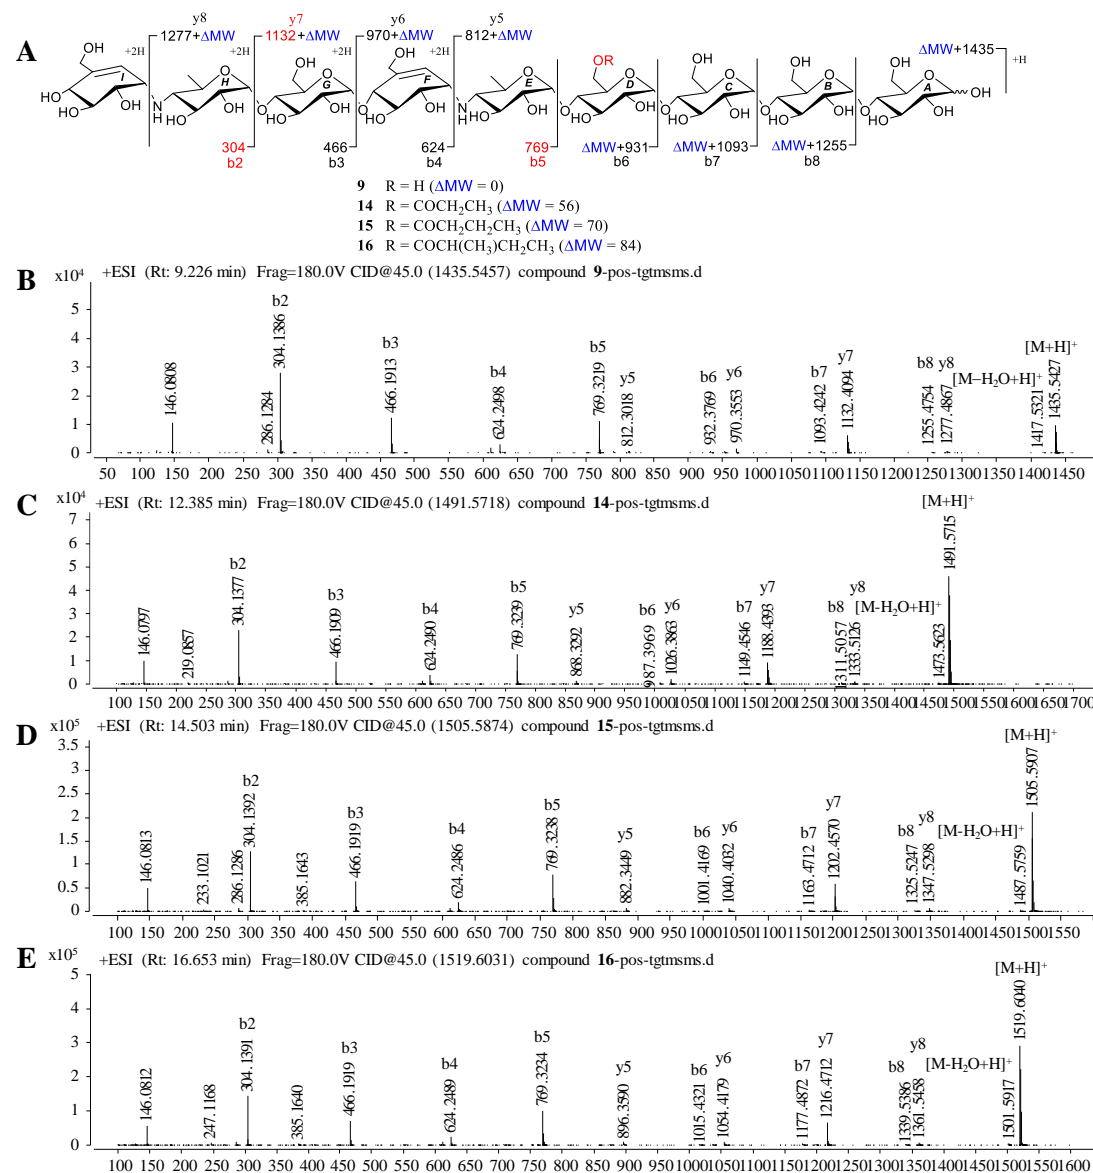

**Figure S2.** Positive HRESIMS/MS fragmentation and spectra of **9** and **14-16**. (A) Positive-ion HRESIMS/MS fragmentation patterns of **9** and **14-16**; (B–E) HRESIMS/MS spectra of **9** and **14-16**.

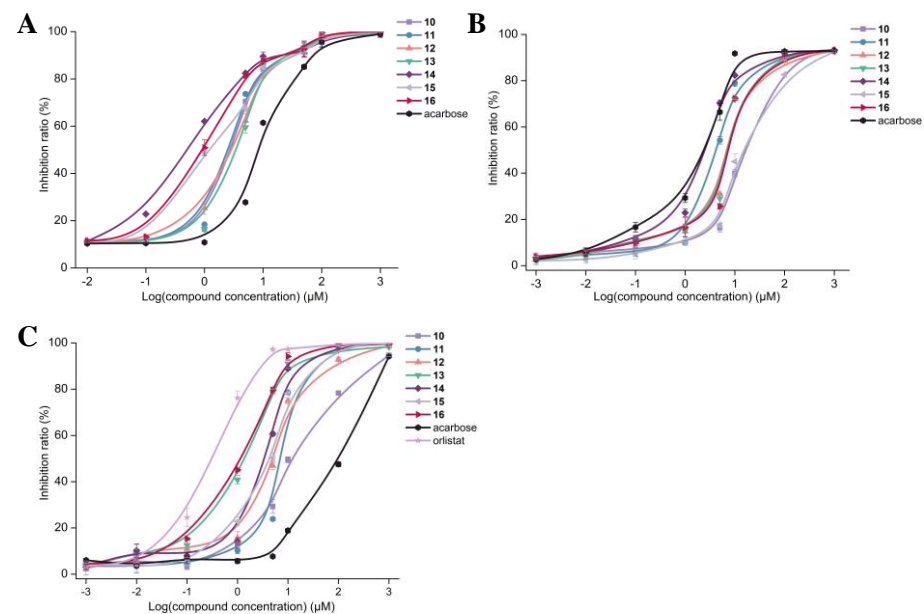

**Figure S3.** The inhibitory activities of **10-16** against three digestive enzymes. (A) The inhibitory activities of **10-16** against PPA. (B) The inhibitory activities of **10-16** against sucrase. (C) The inhibitory activities of **10-16** against PL.

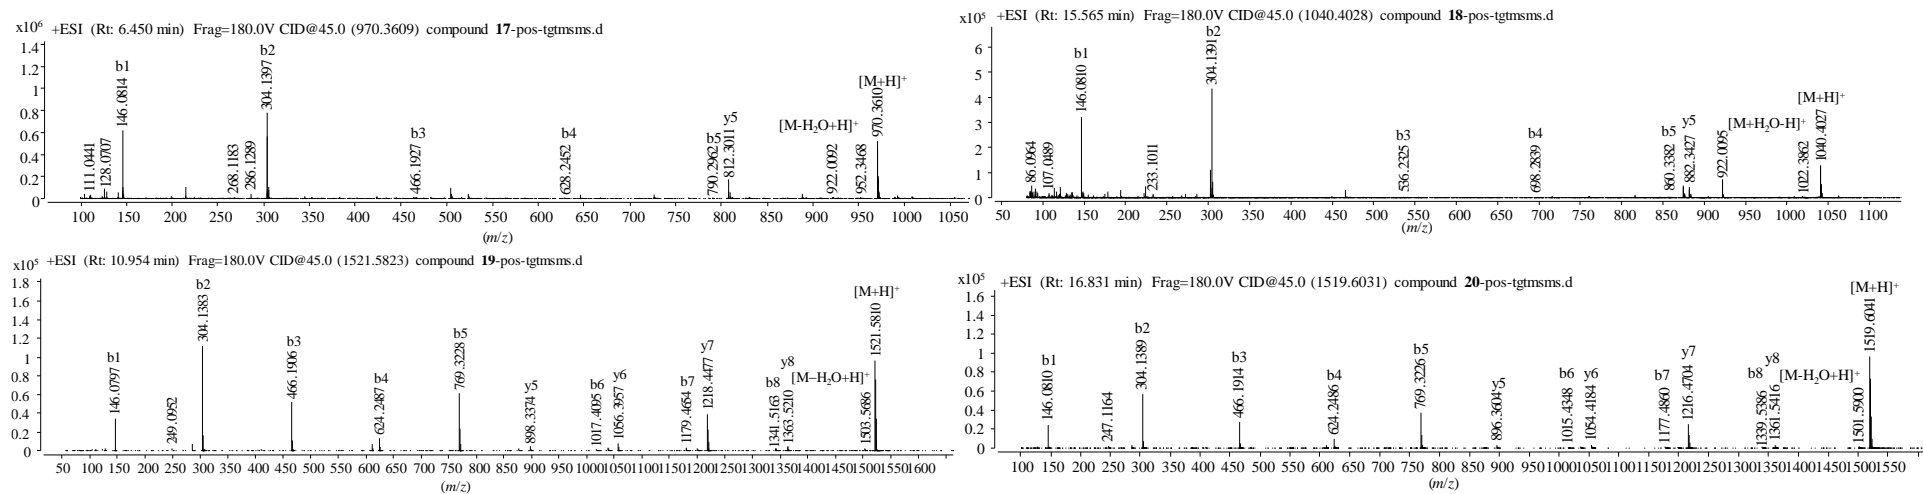

**Figure S4.** HRESI-MS/MS spectra of compounds **17-20**.

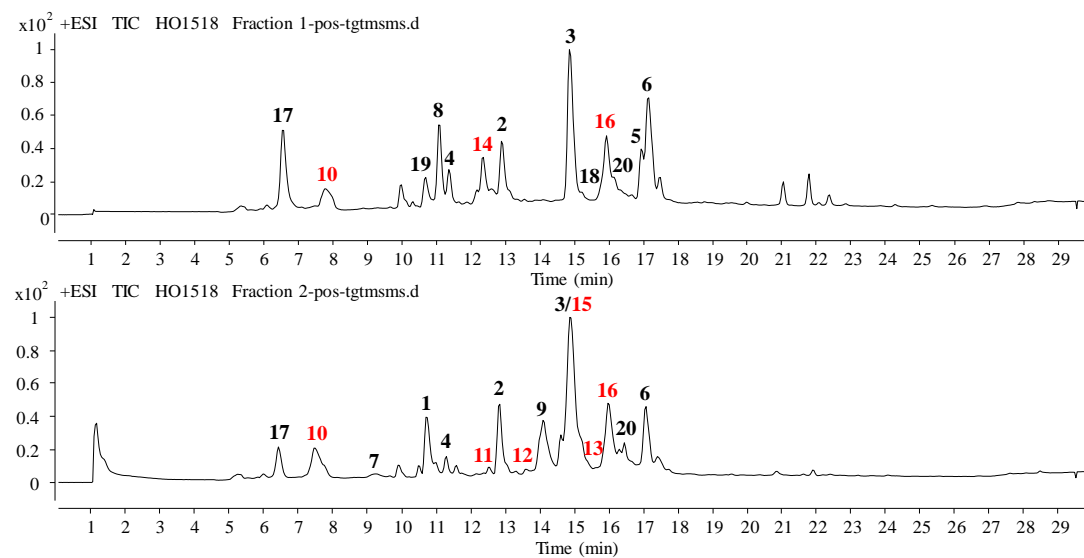

**Figure S5.** The total ion chromatograms of fraction 1 and 2 derived from *Streptomyces* sp. HO1518.

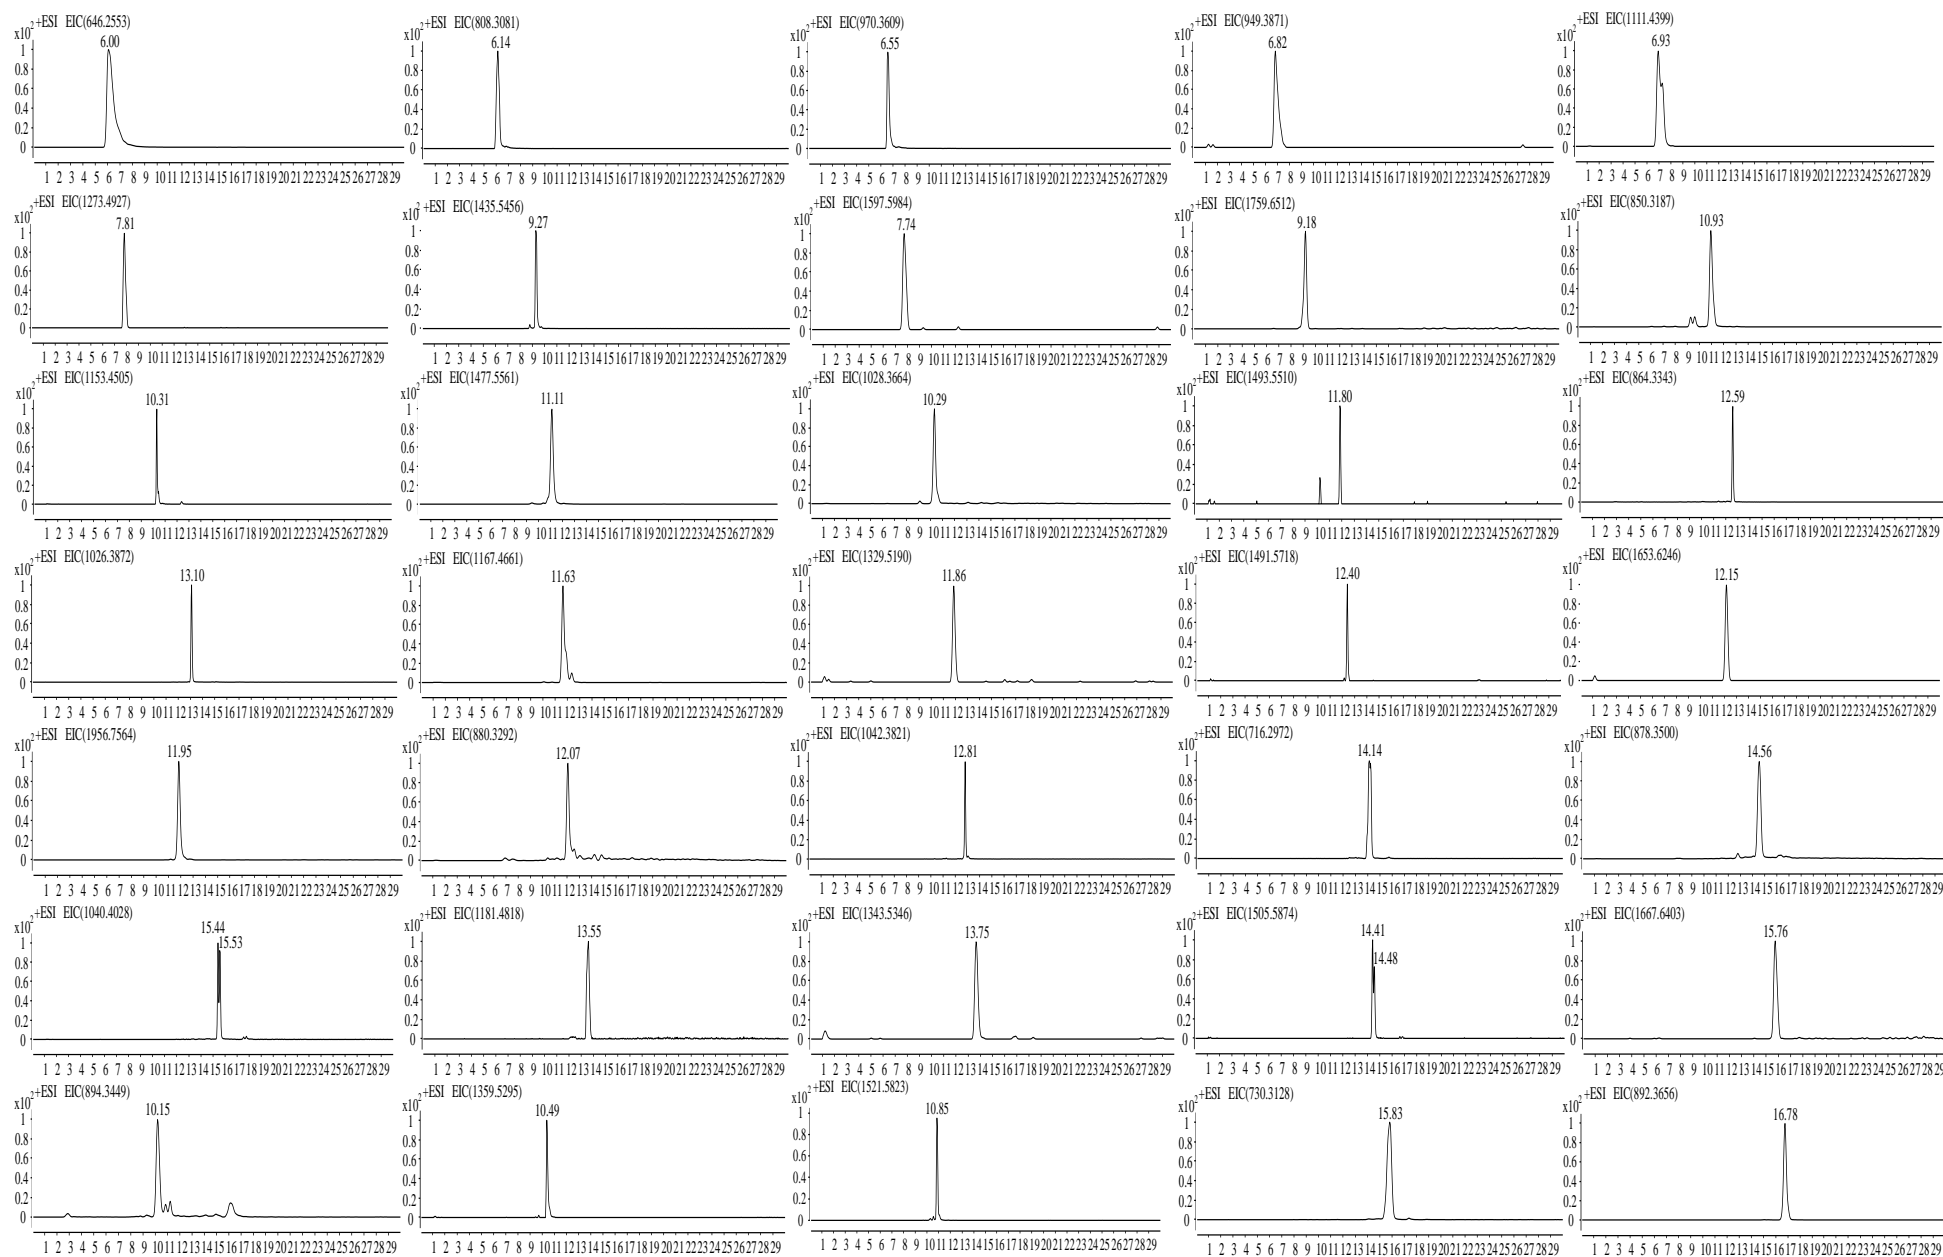

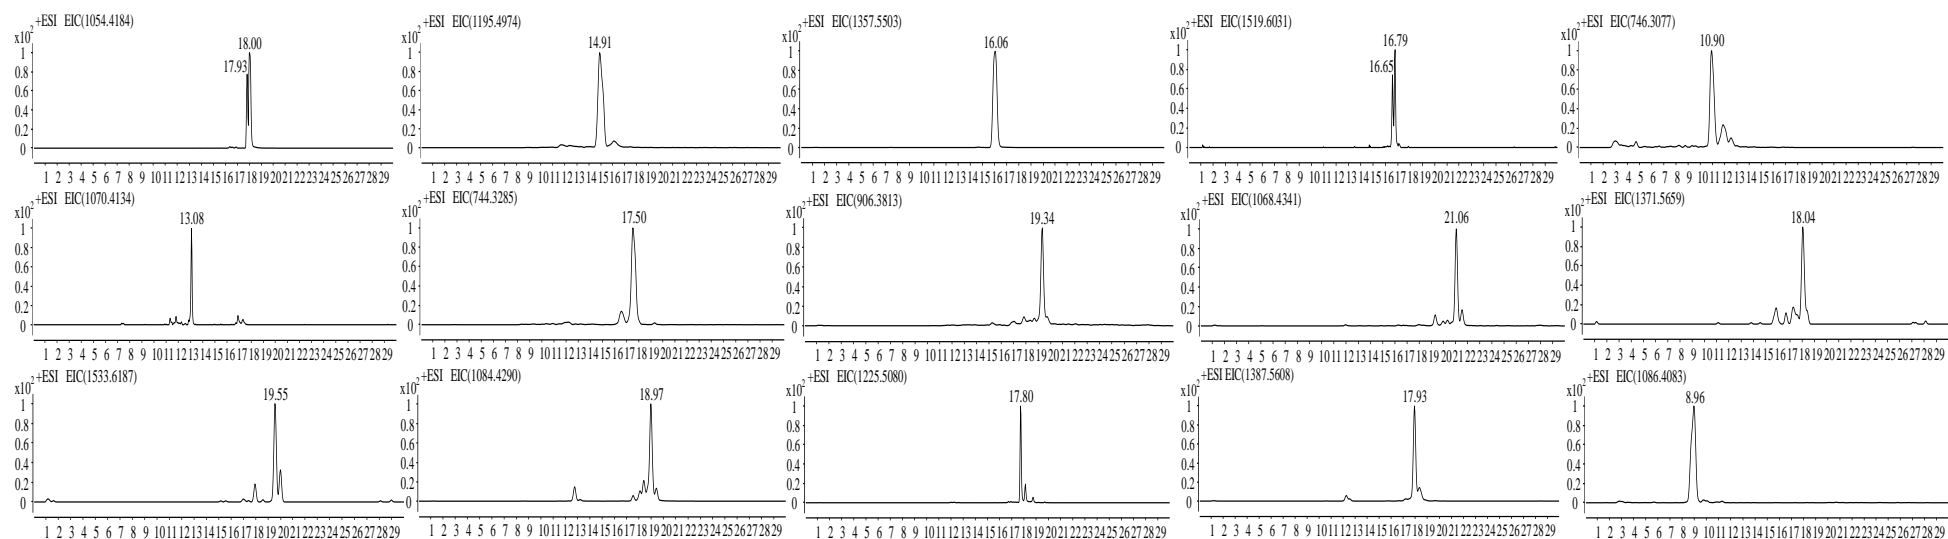

**Figure S6.** The EIC of acarviostatins with glucose at the reducing terminus from *Streptomyces* sp. HO1518.

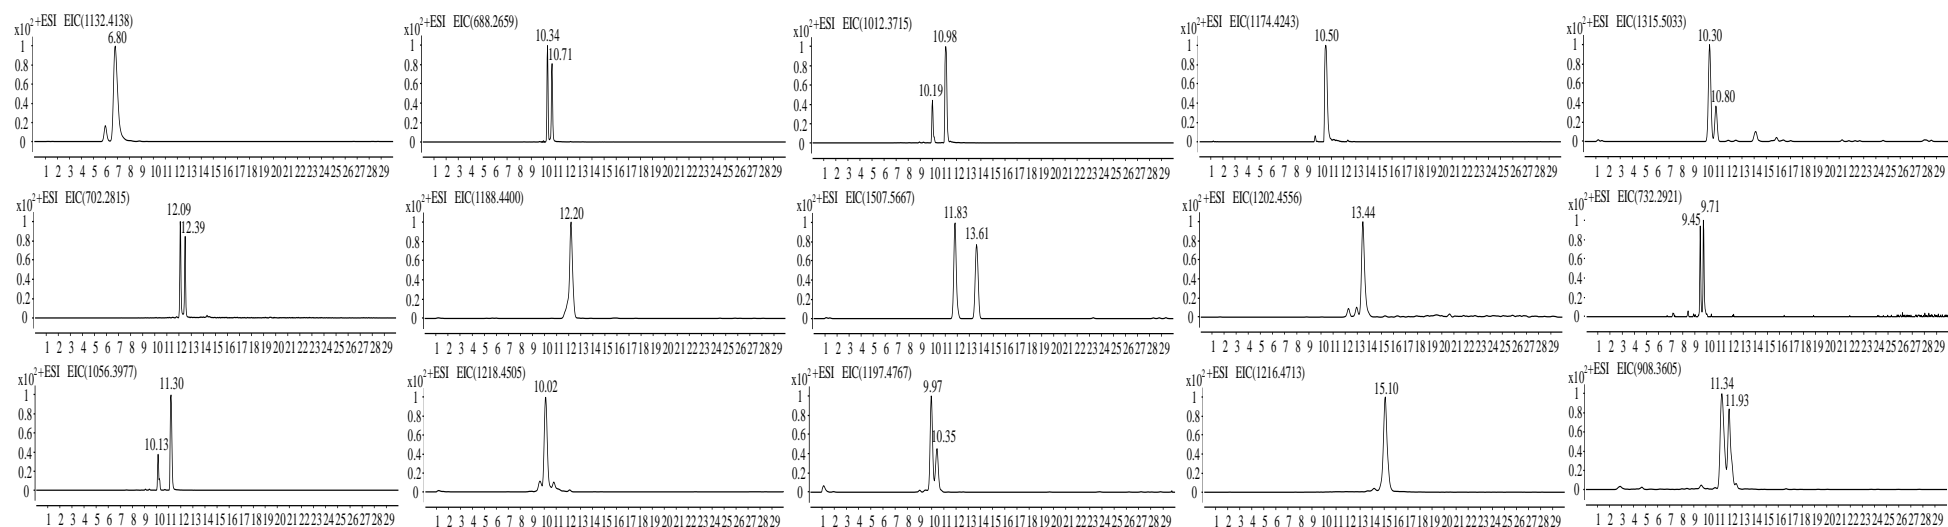

**Figure S7.** The EIC of acarviostatins with glucose at the reducing and nonreducing terminus from *Streptomyces* sp. HO1518.



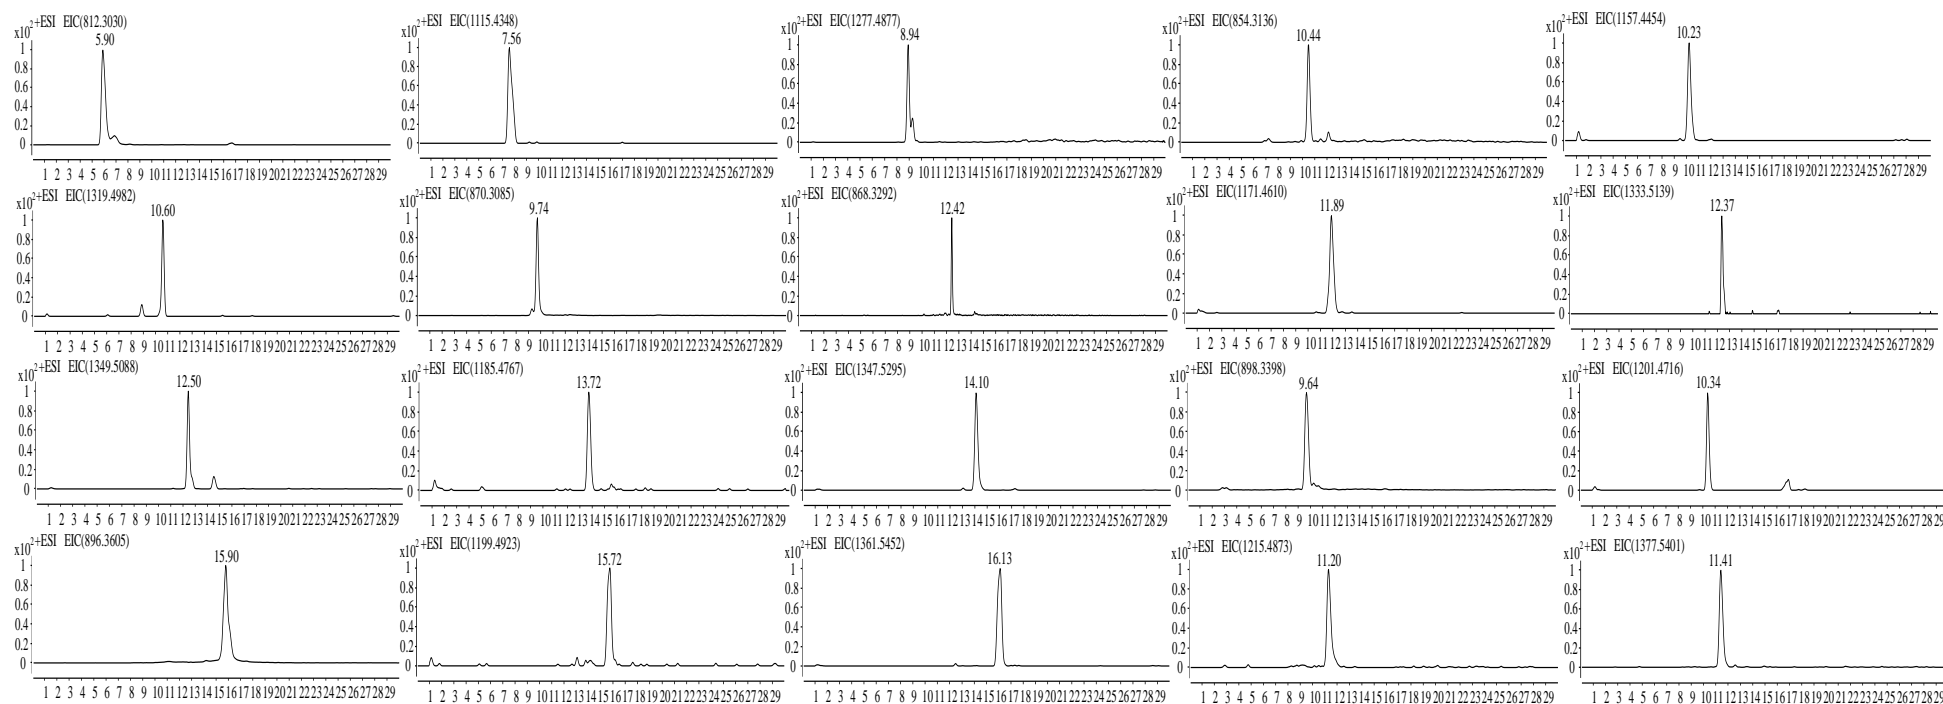

**Figure S8.** The EIC of acarviostatins with an incomplete *pseudo*-tetrasaccharide at the nonreducing terminus from *Streptomyces* sp. HO1518.

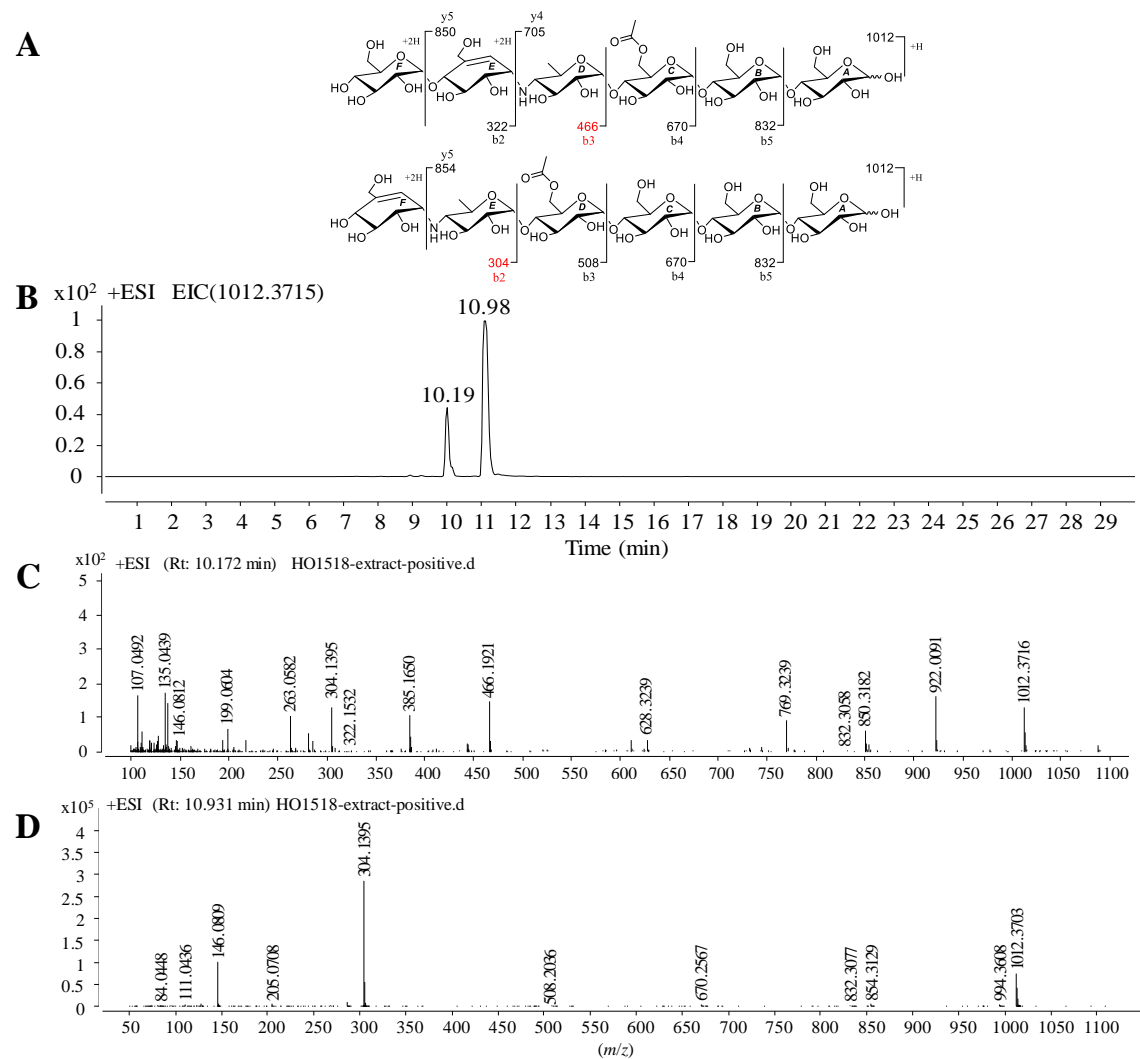

**Figure S9.** Positive HRESIMS/MS fragmentation and spectra of Ac-Aca I12 and Ac-Aca I03. (A) Positive-ion HRESIMS/MS fragmentation patterns of Ac-Aca I12 and Ac-Aca I03; (B) The extracted ion chromatogram of aminooligosaccharides at  $m/z$  1012; (C) HRESIMS/MS spectrum of Ac-Aca I12; (D) HRESIMS/MS spectrum of Ac-Aca I03.

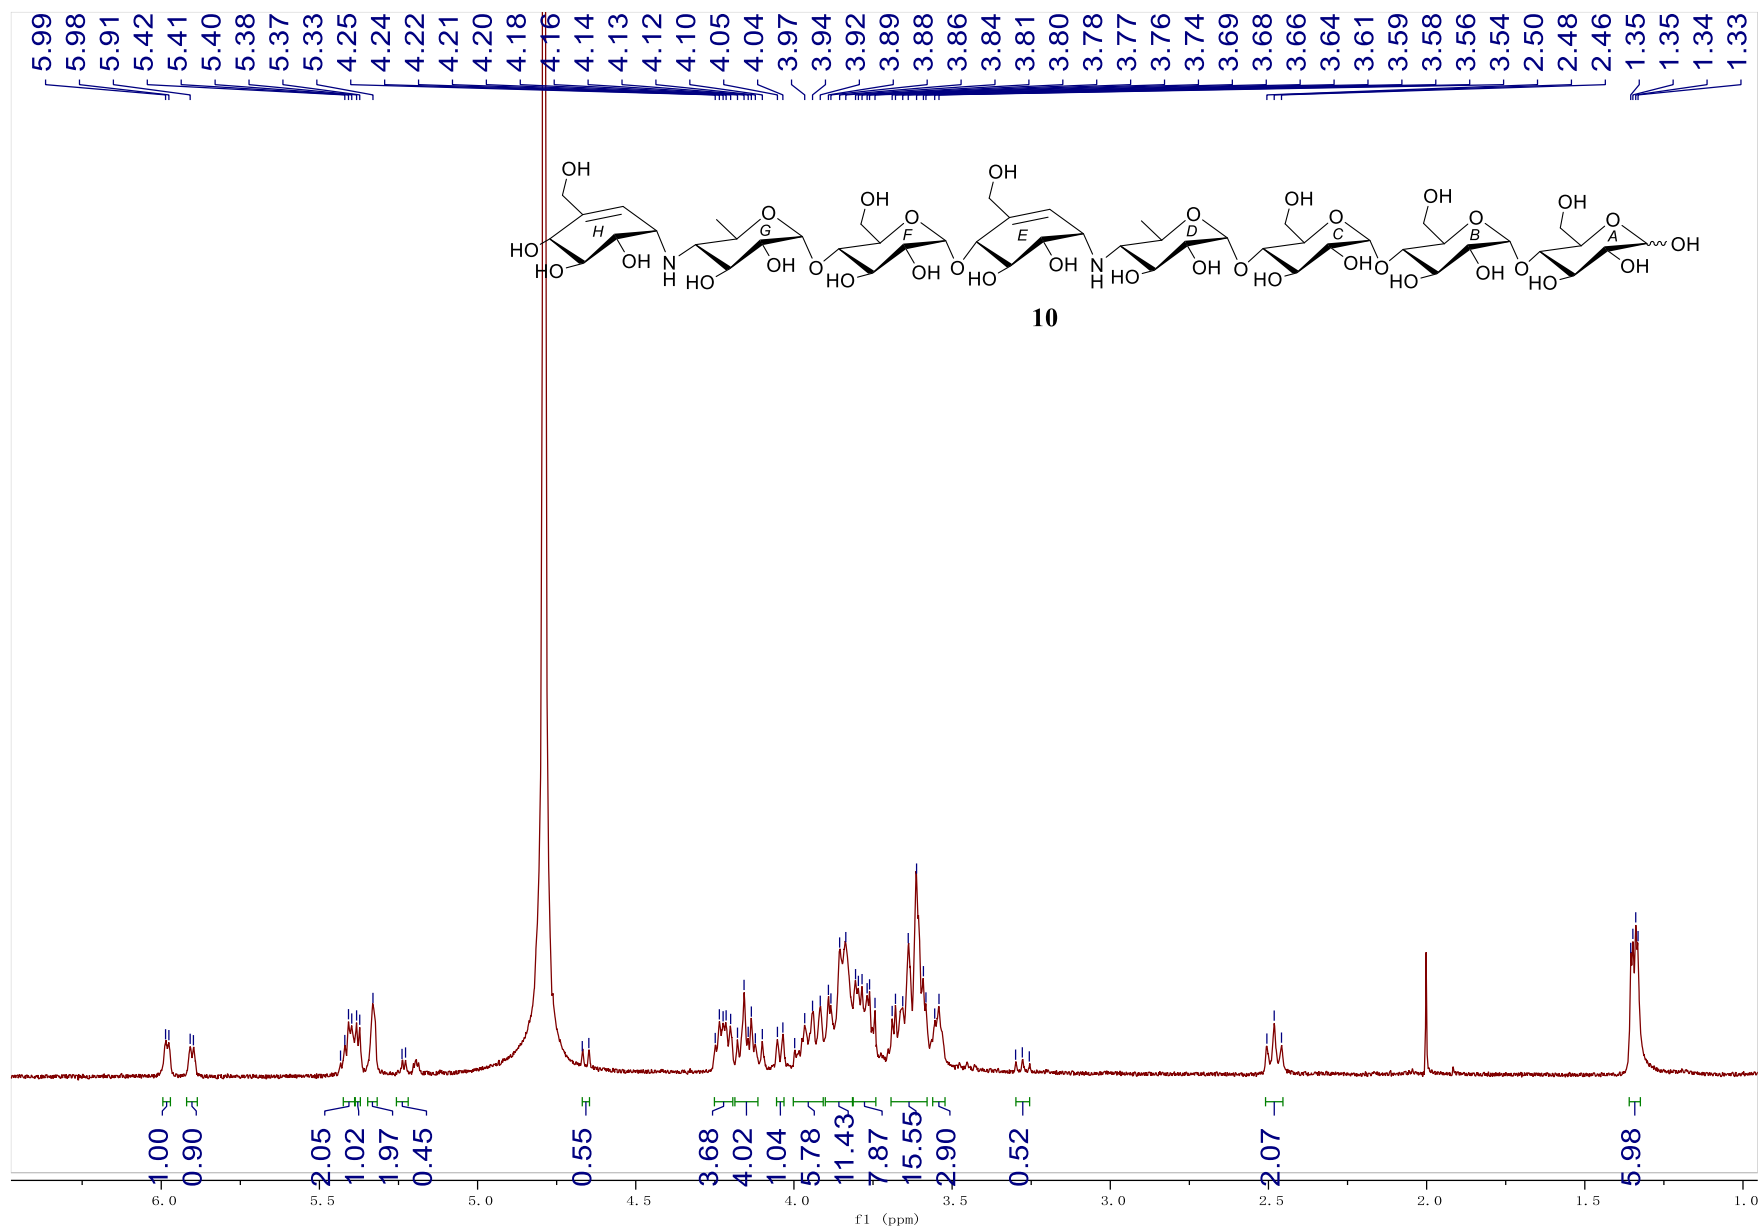

**Figure S10.**  $^1\text{H}$  NMR spectrum of compound **10** (500 MHz,  $\text{D}_2\text{O}$ ).

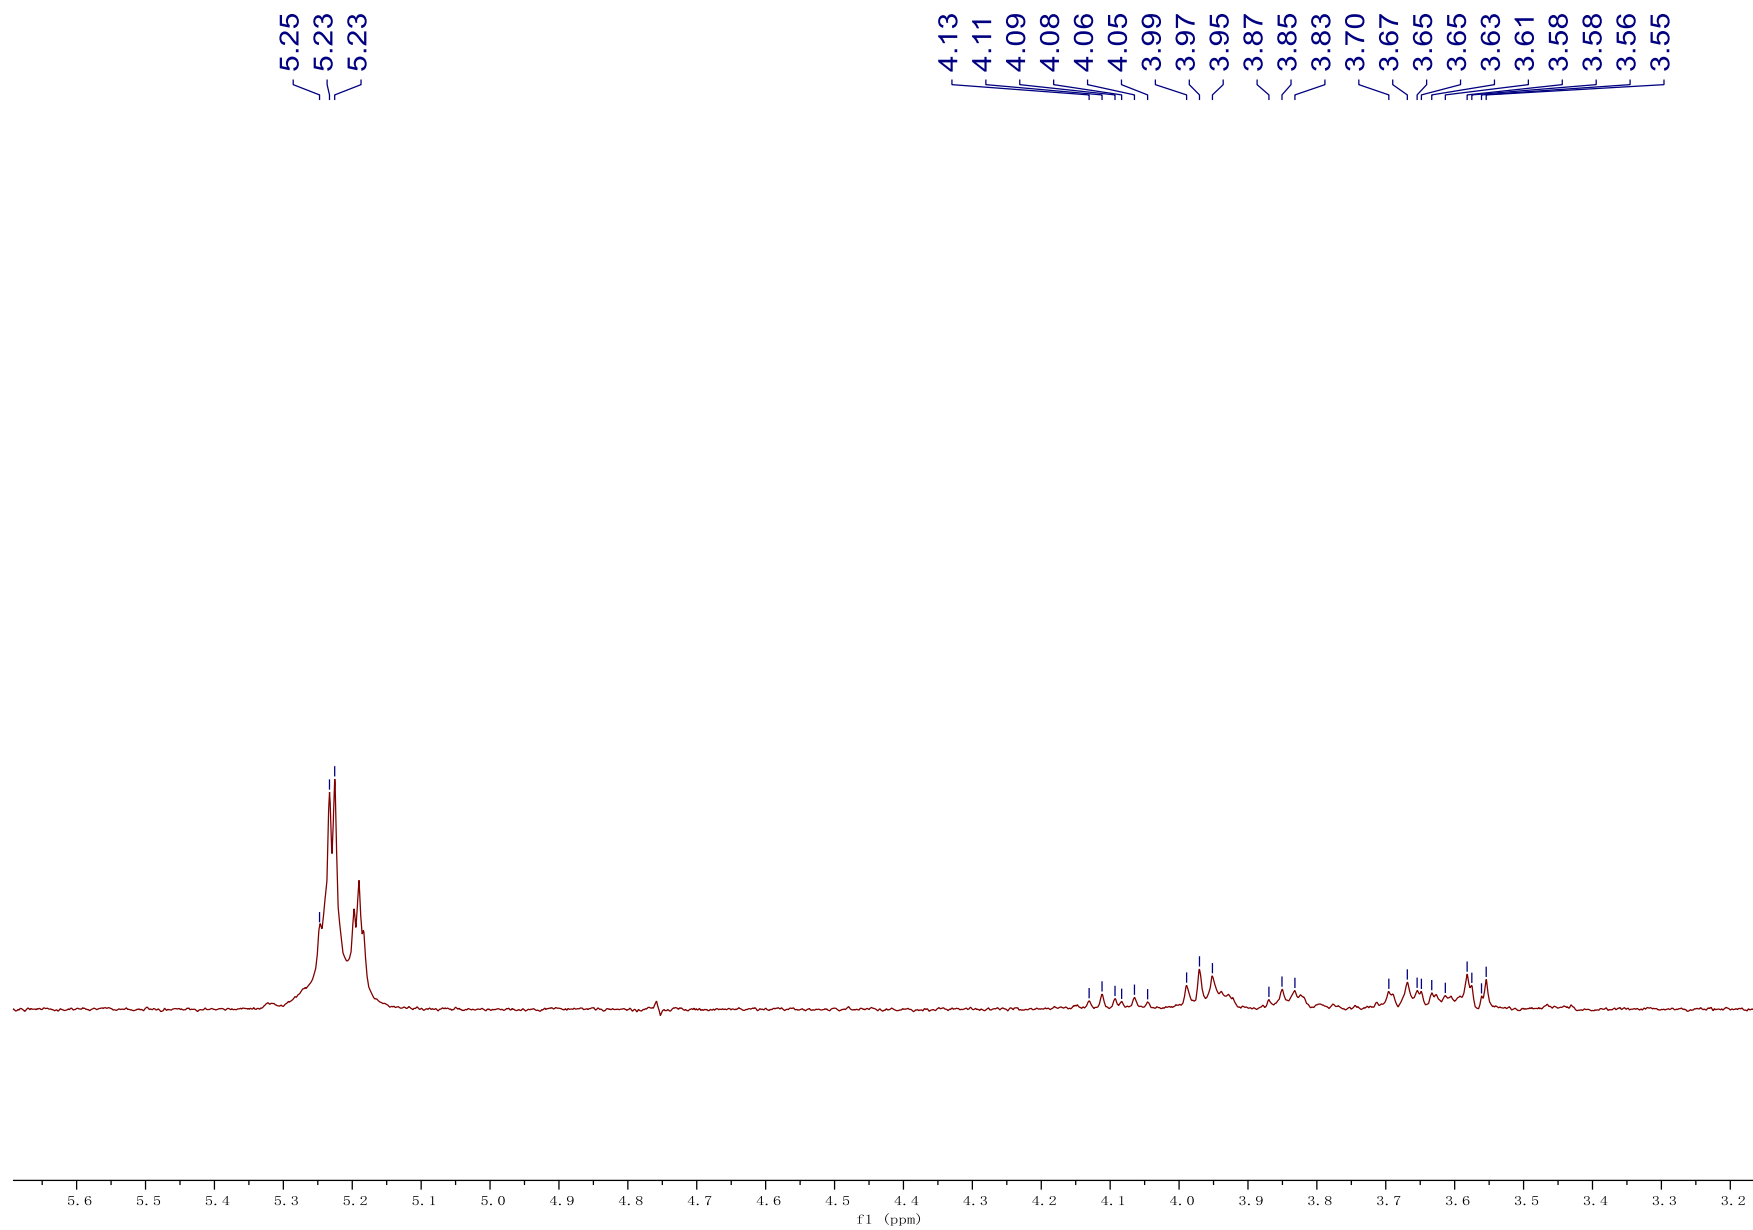

**Figure S11.** 1D-selective TOCSY spectrum of compound **10** (500 MHz, D<sub>2</sub>O, excitation at  $\delta$  5.23, H-A1 $\alpha$ ).

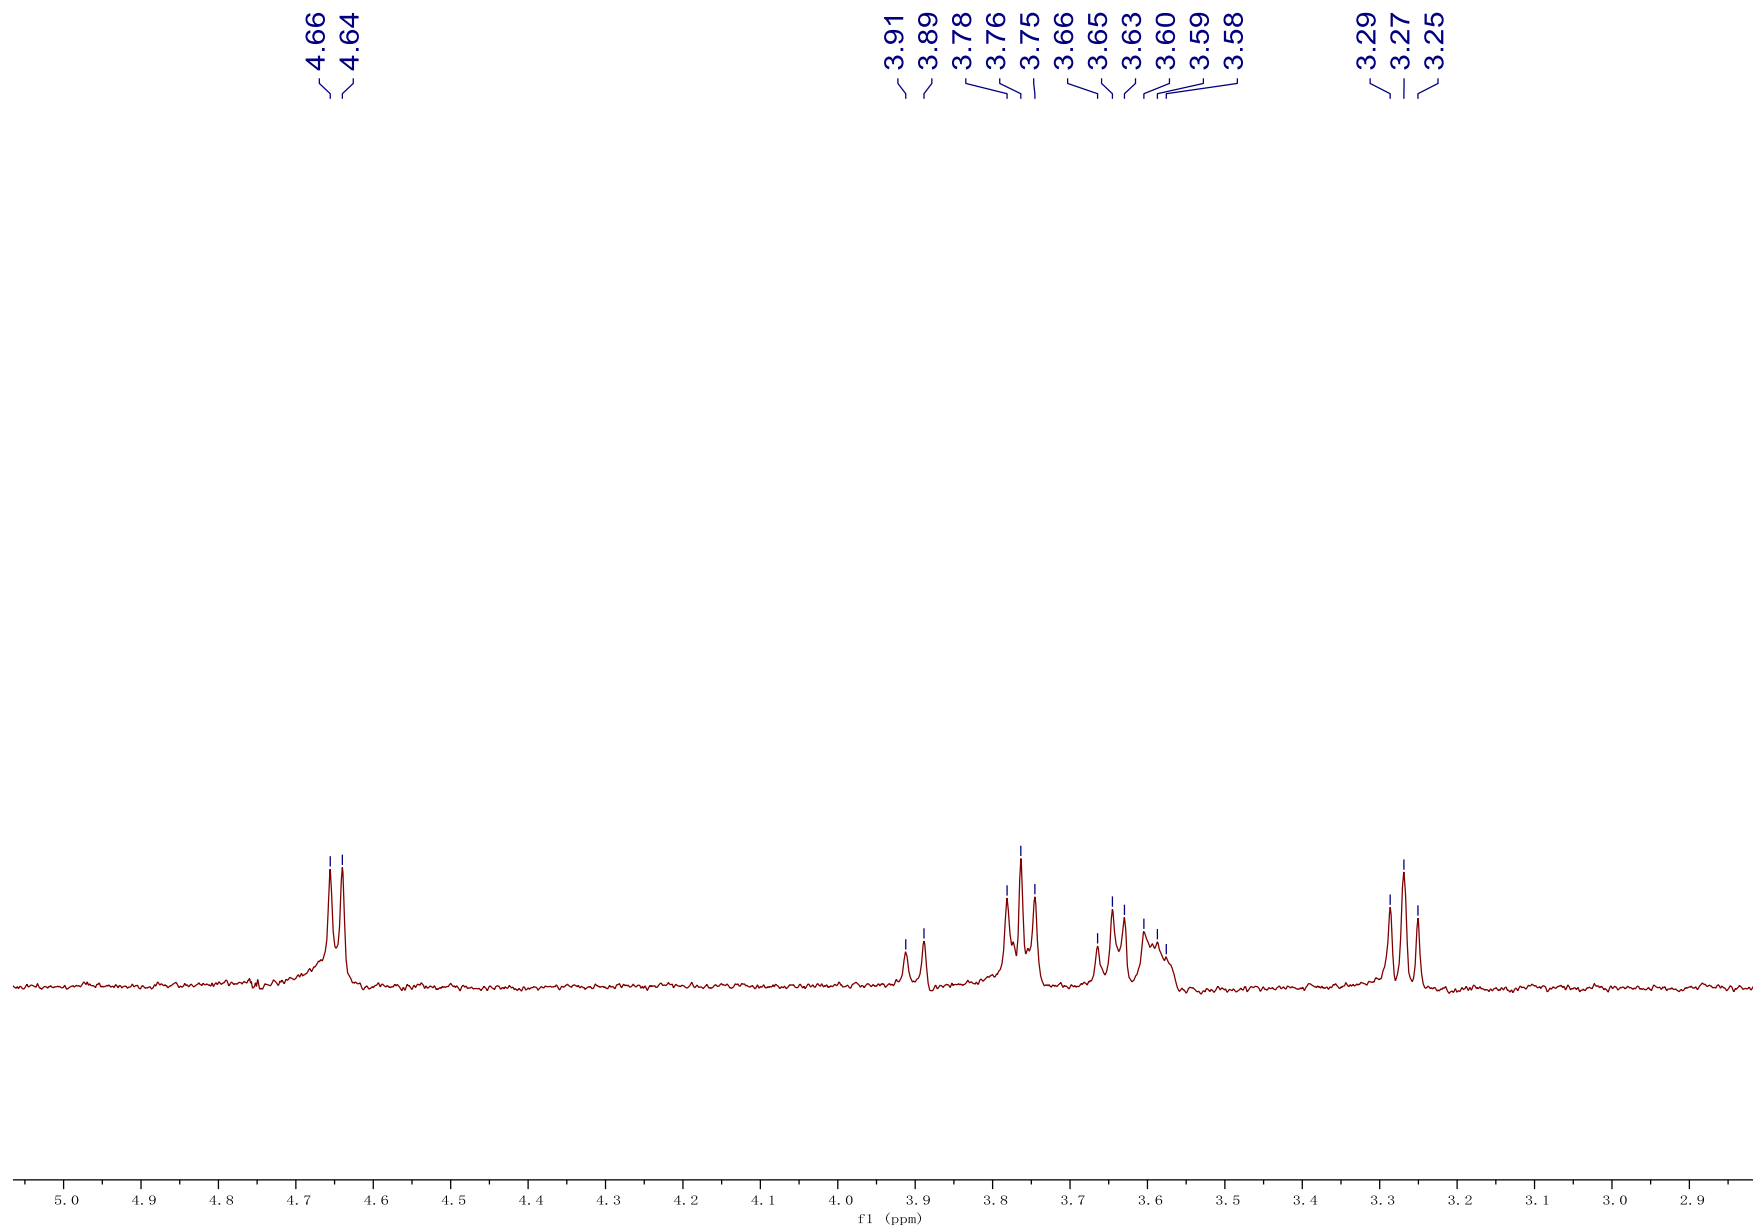

**Figure S12.** 1D-selective TOCSY spectrum of compound **10** (500 MHz, D<sub>2</sub>O, excitation at  $\delta$  4.65, H-A1 $\beta$ ).

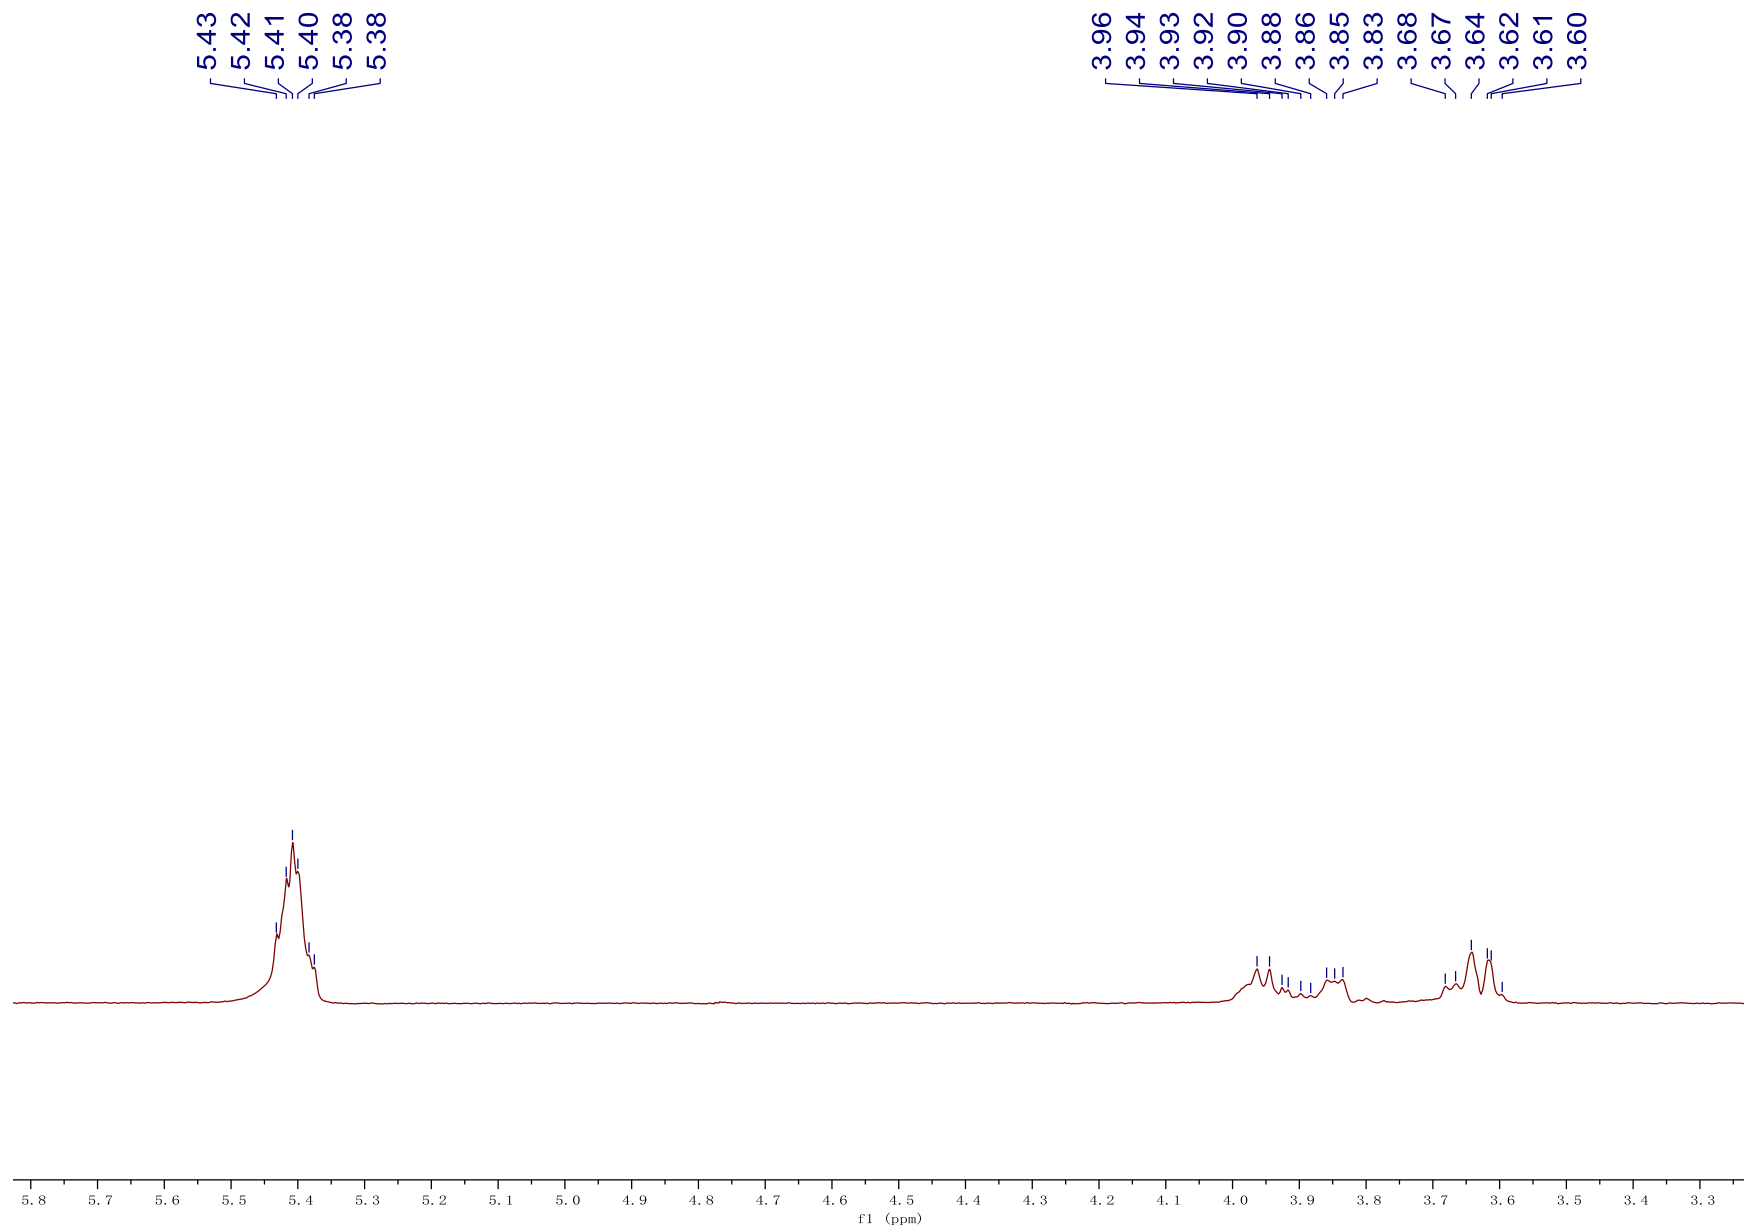

**Figure S13.** 1D-selective TOCSY spectrum of compound **10** (500 MHz, D<sub>2</sub>O, excitation at  $\delta$  5.41, H-**B1**, and H-**C1**).

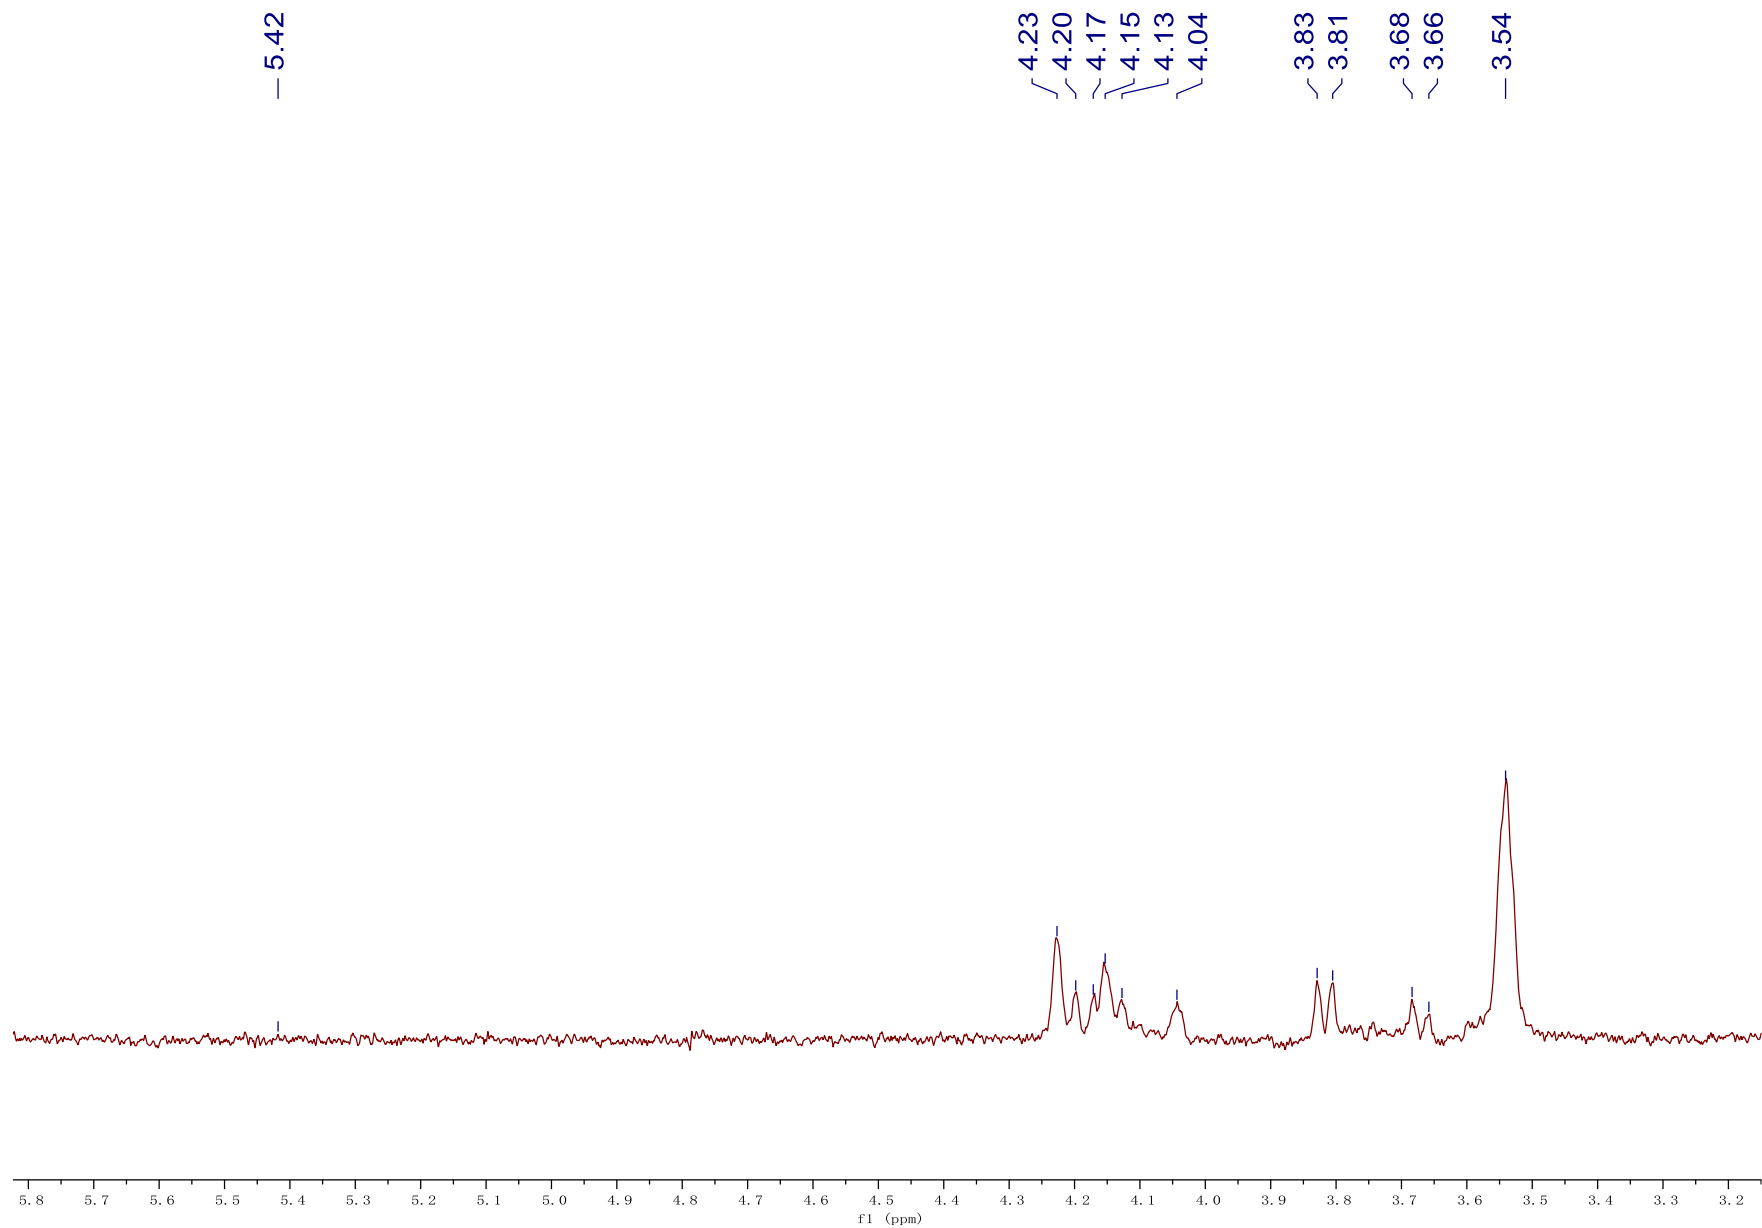

**Figure S14.** 1D-selective TOCSY spectrum of compound **10** (500 MHz, D<sub>2</sub>O, excitation at  $\delta$  4.22, H-C6).

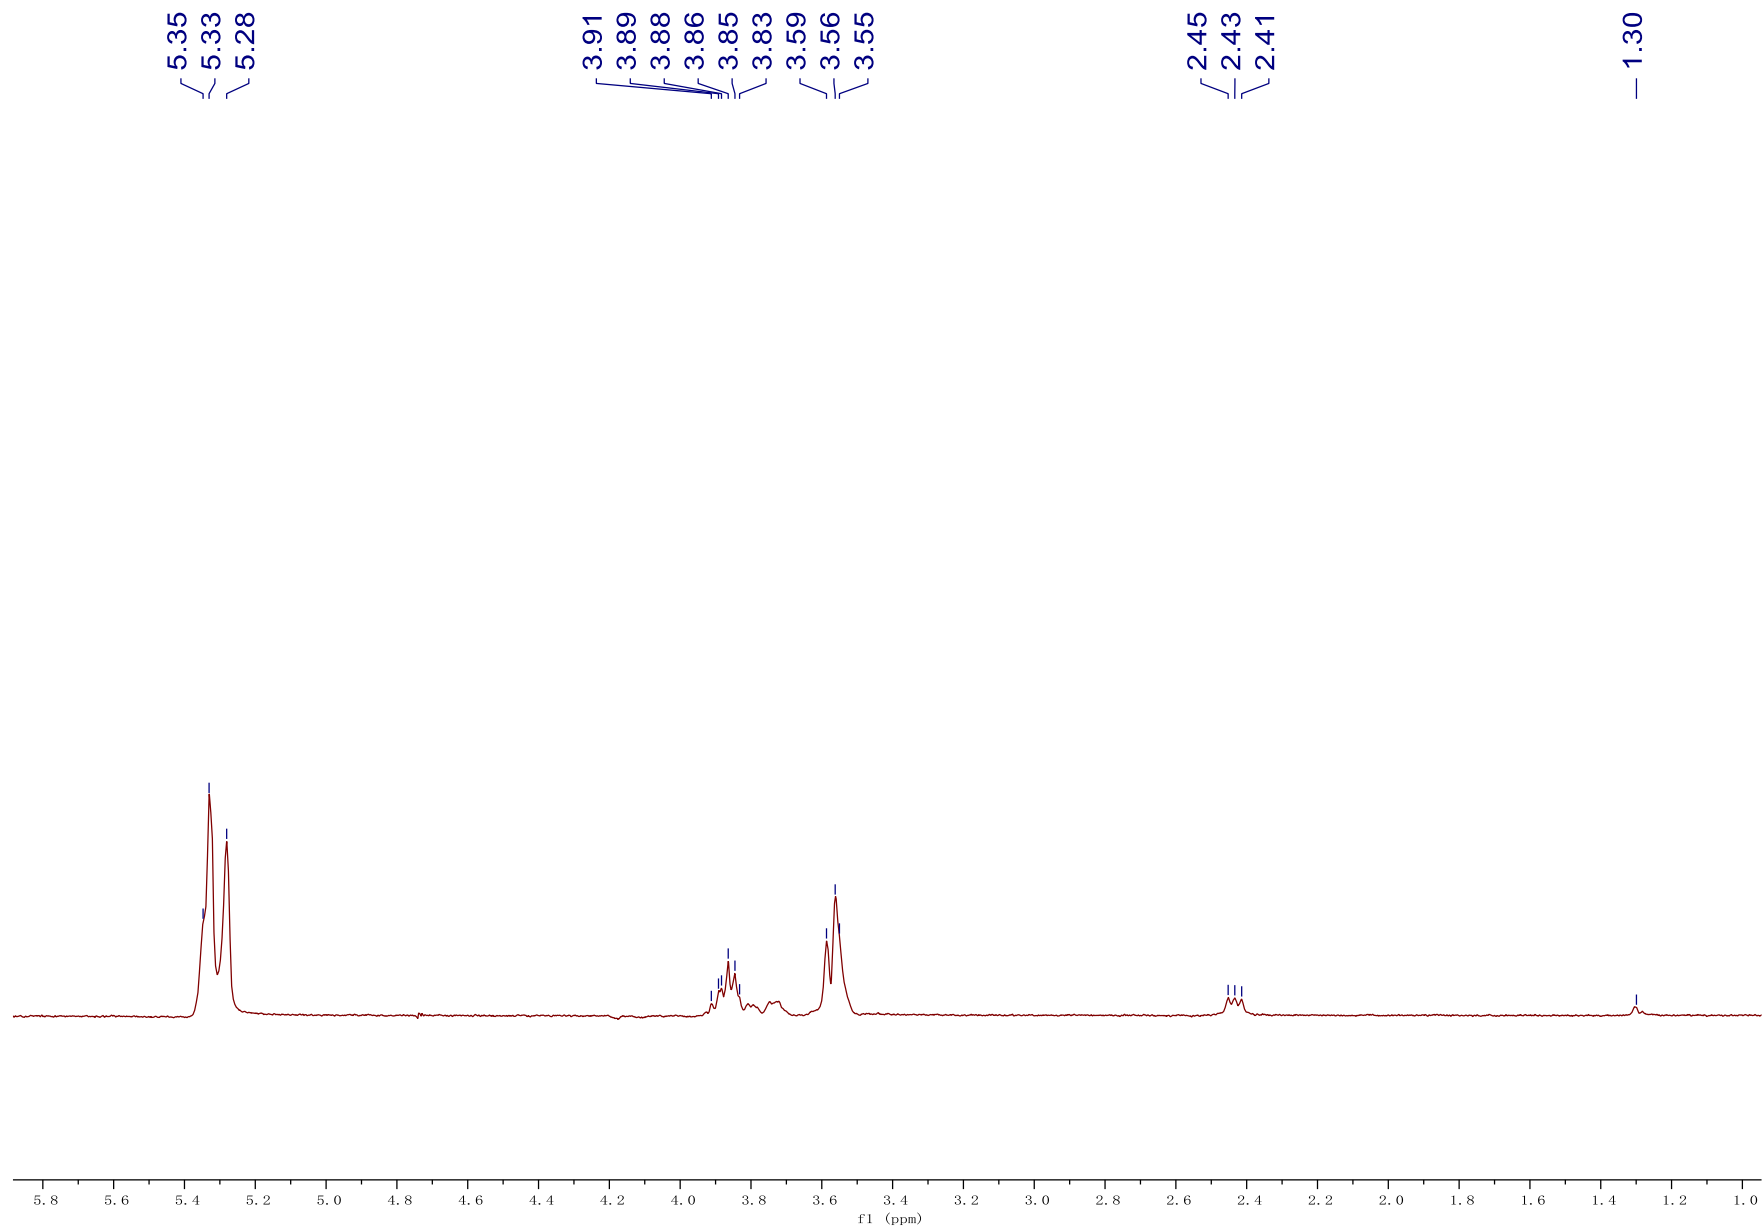

**Figure S15.** 1D-selective TOCSY spectrum of compound **10** (500 MHz, D<sub>2</sub>O, excitation at  $\delta$  5.33, H-**D1** and H-**G1**).



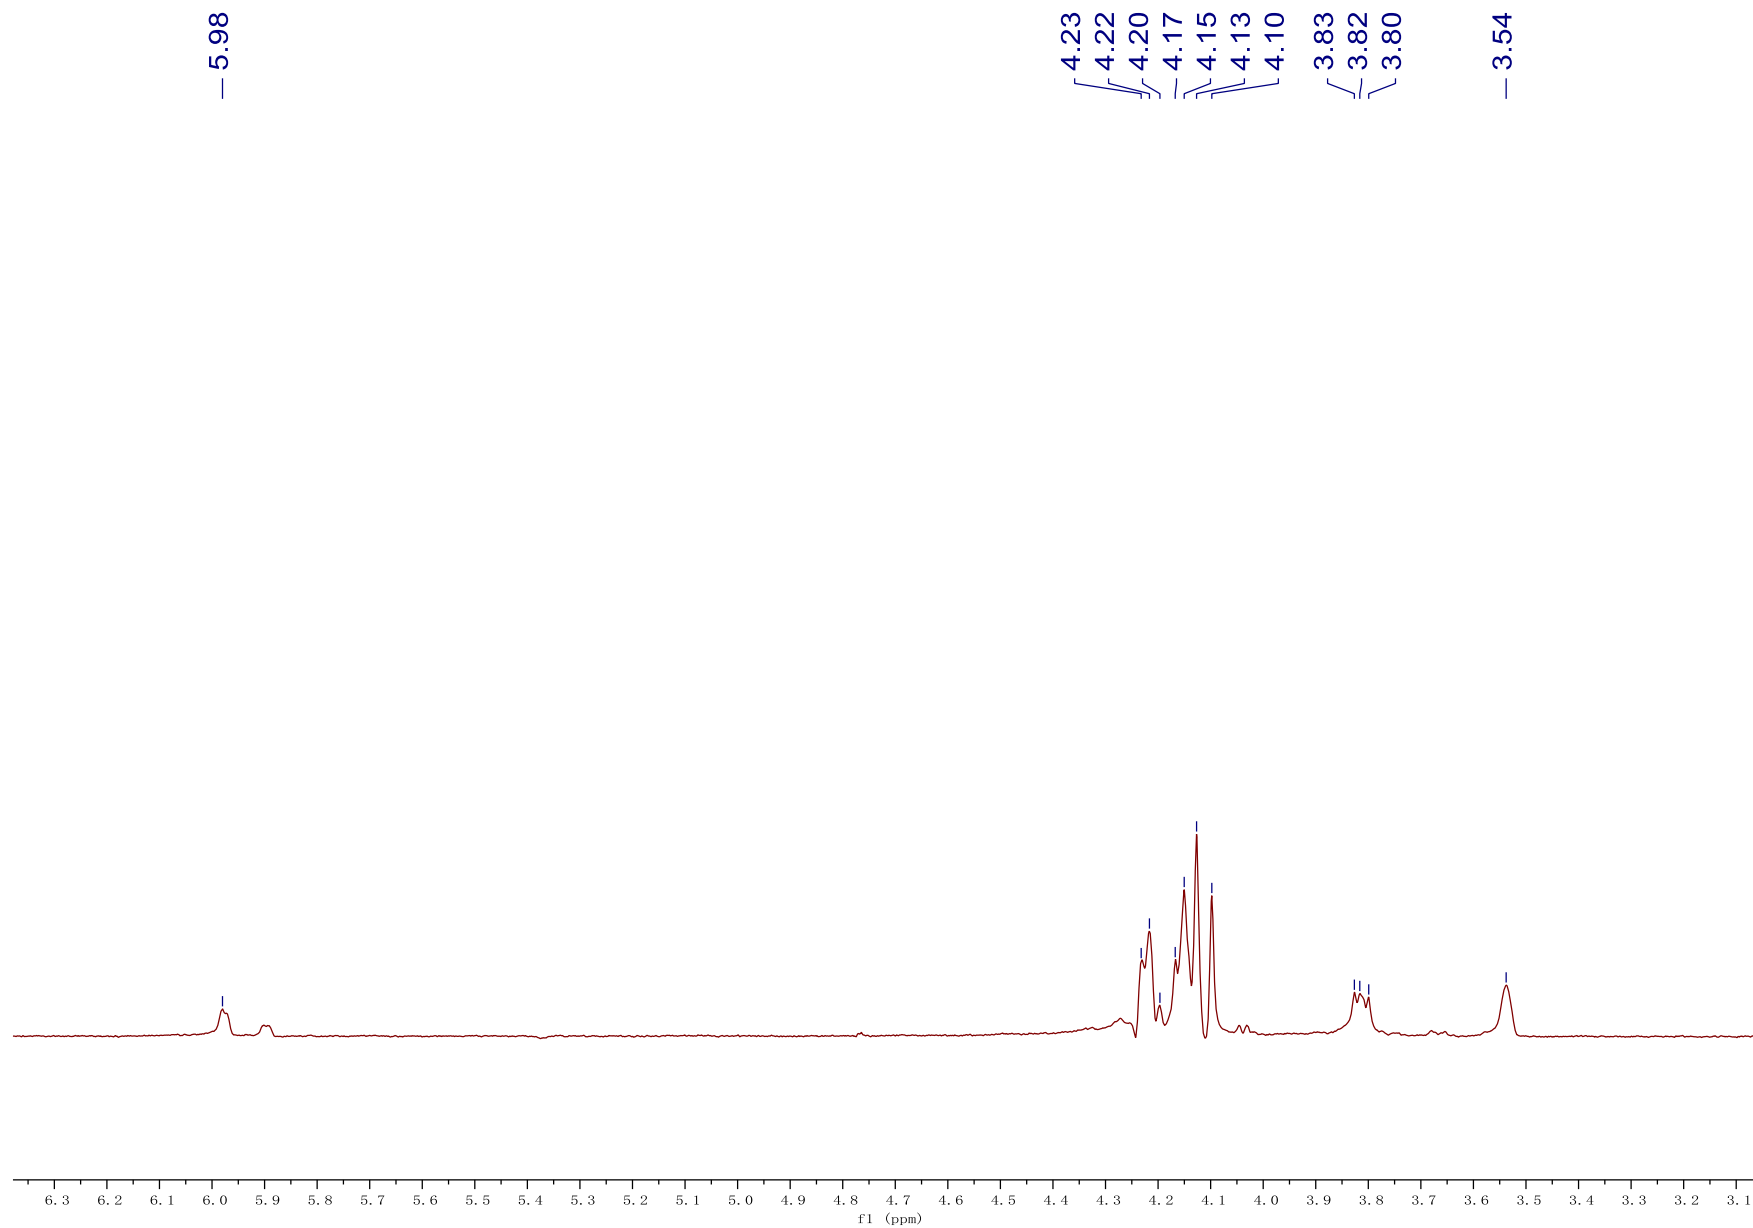

**Figure S16.** 1D-selective TOCSY spectrum of compound **10** (500 MHz, D<sub>2</sub>O, excitation at  $\delta$  5.98, H-E7).

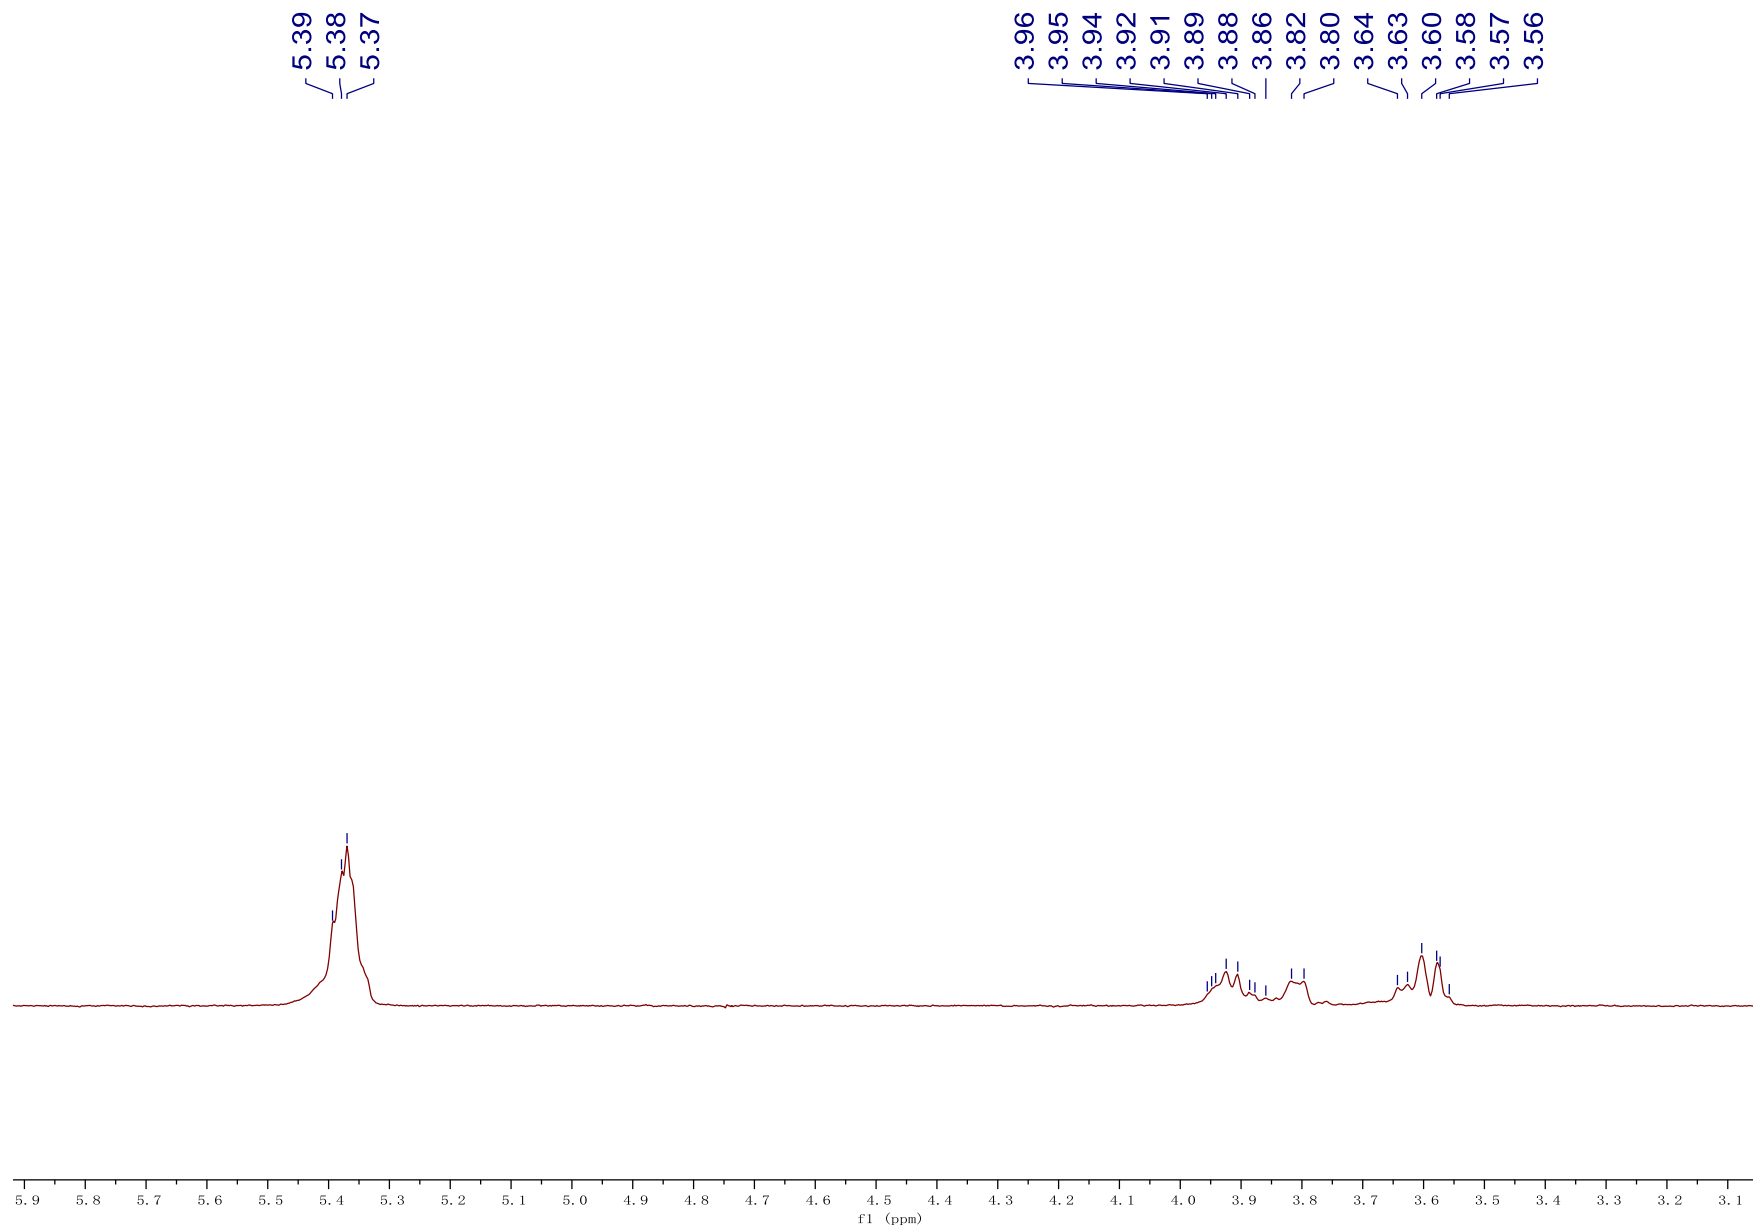

**Figure S17.** 1D-selective TOCSY spectrum of compound **10** (500 MHz, D<sub>2</sub>O, excitation at  $\delta$  5.38, H-F1).

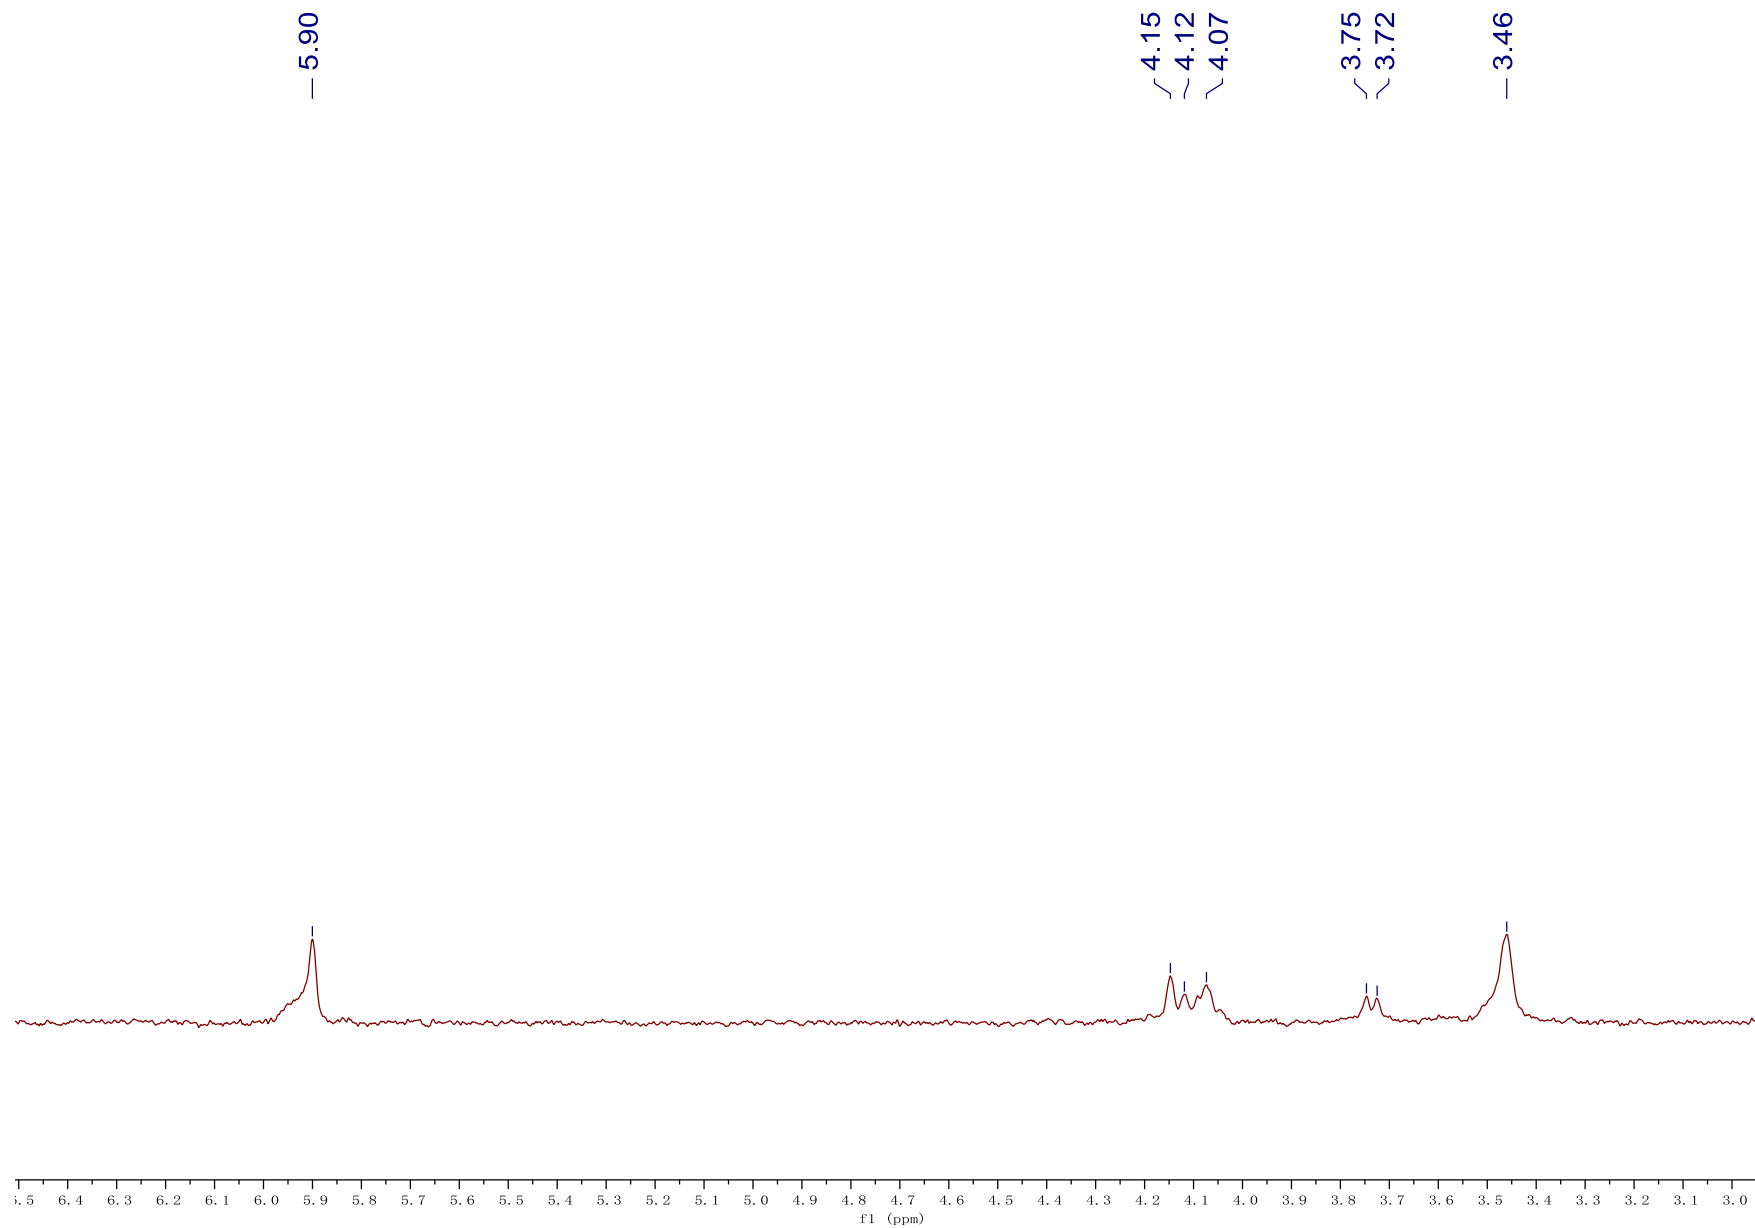

**Figure S18.** 1D-selective TOCSY spectrum of compound **10** (500 MHz, D<sub>2</sub>O, excitation at  $\delta$  5.90, H-**H**7).

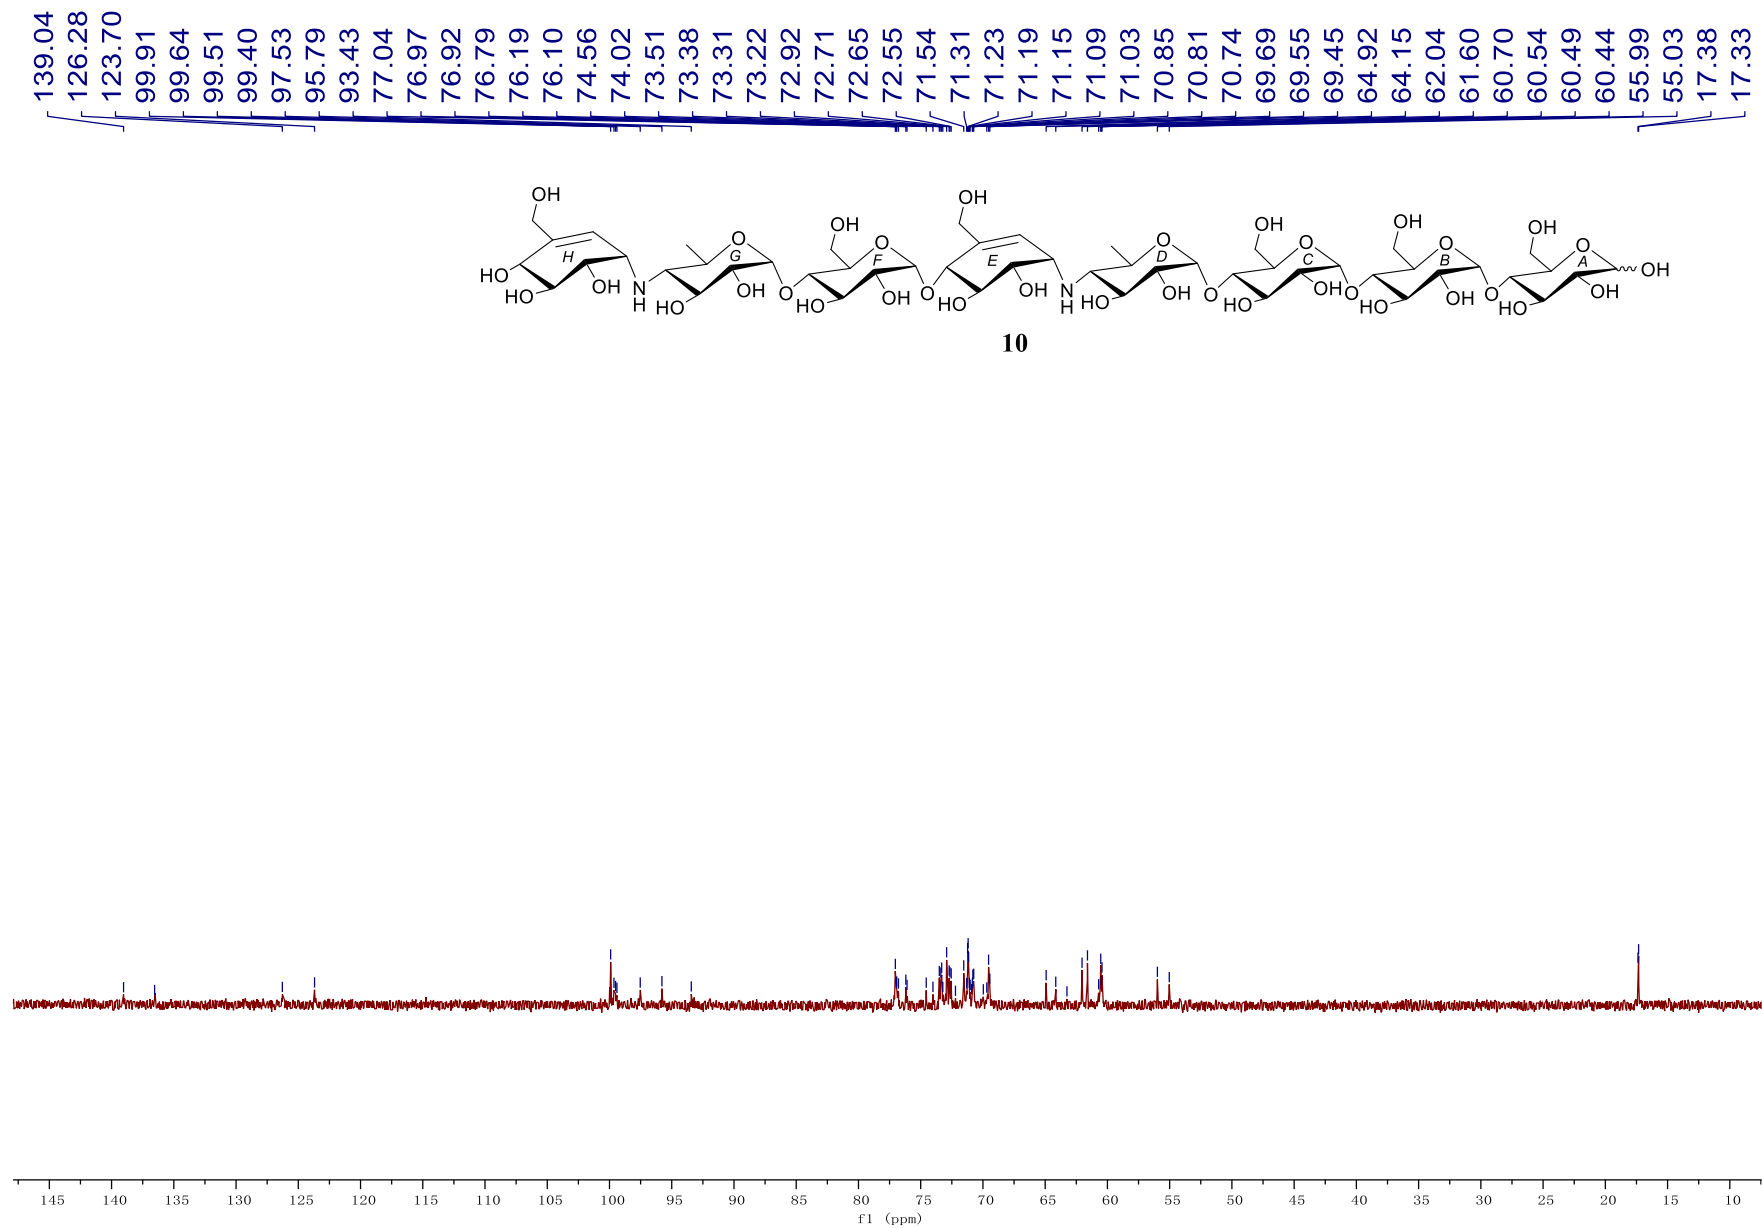

**Figure S19.**  $^{13}\text{C}$  NMR spectrum of compound **10** (125 MHz,  $\text{D}_2\text{O}$ ).

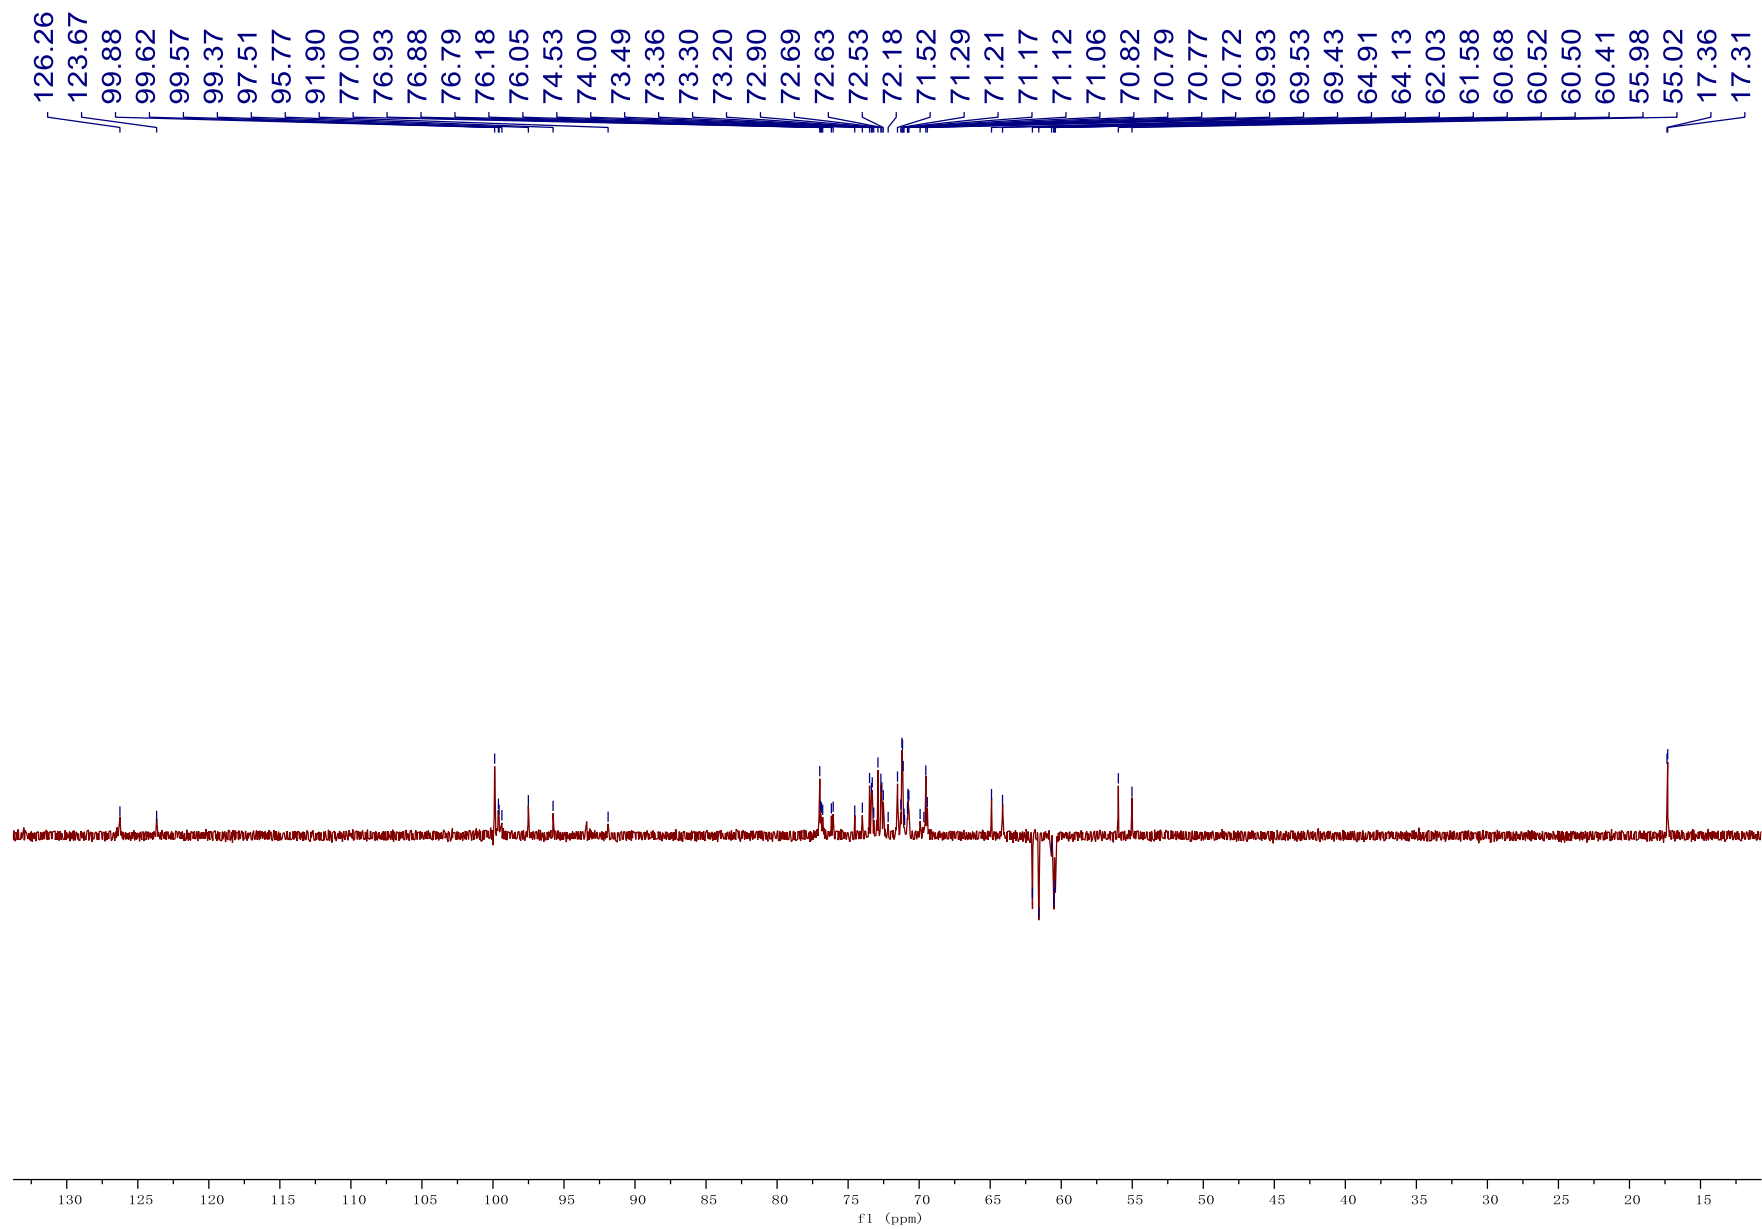

**Figure S20.** DEPT-135 spectrum of compound **10** (125 MHz, D<sub>2</sub>O).

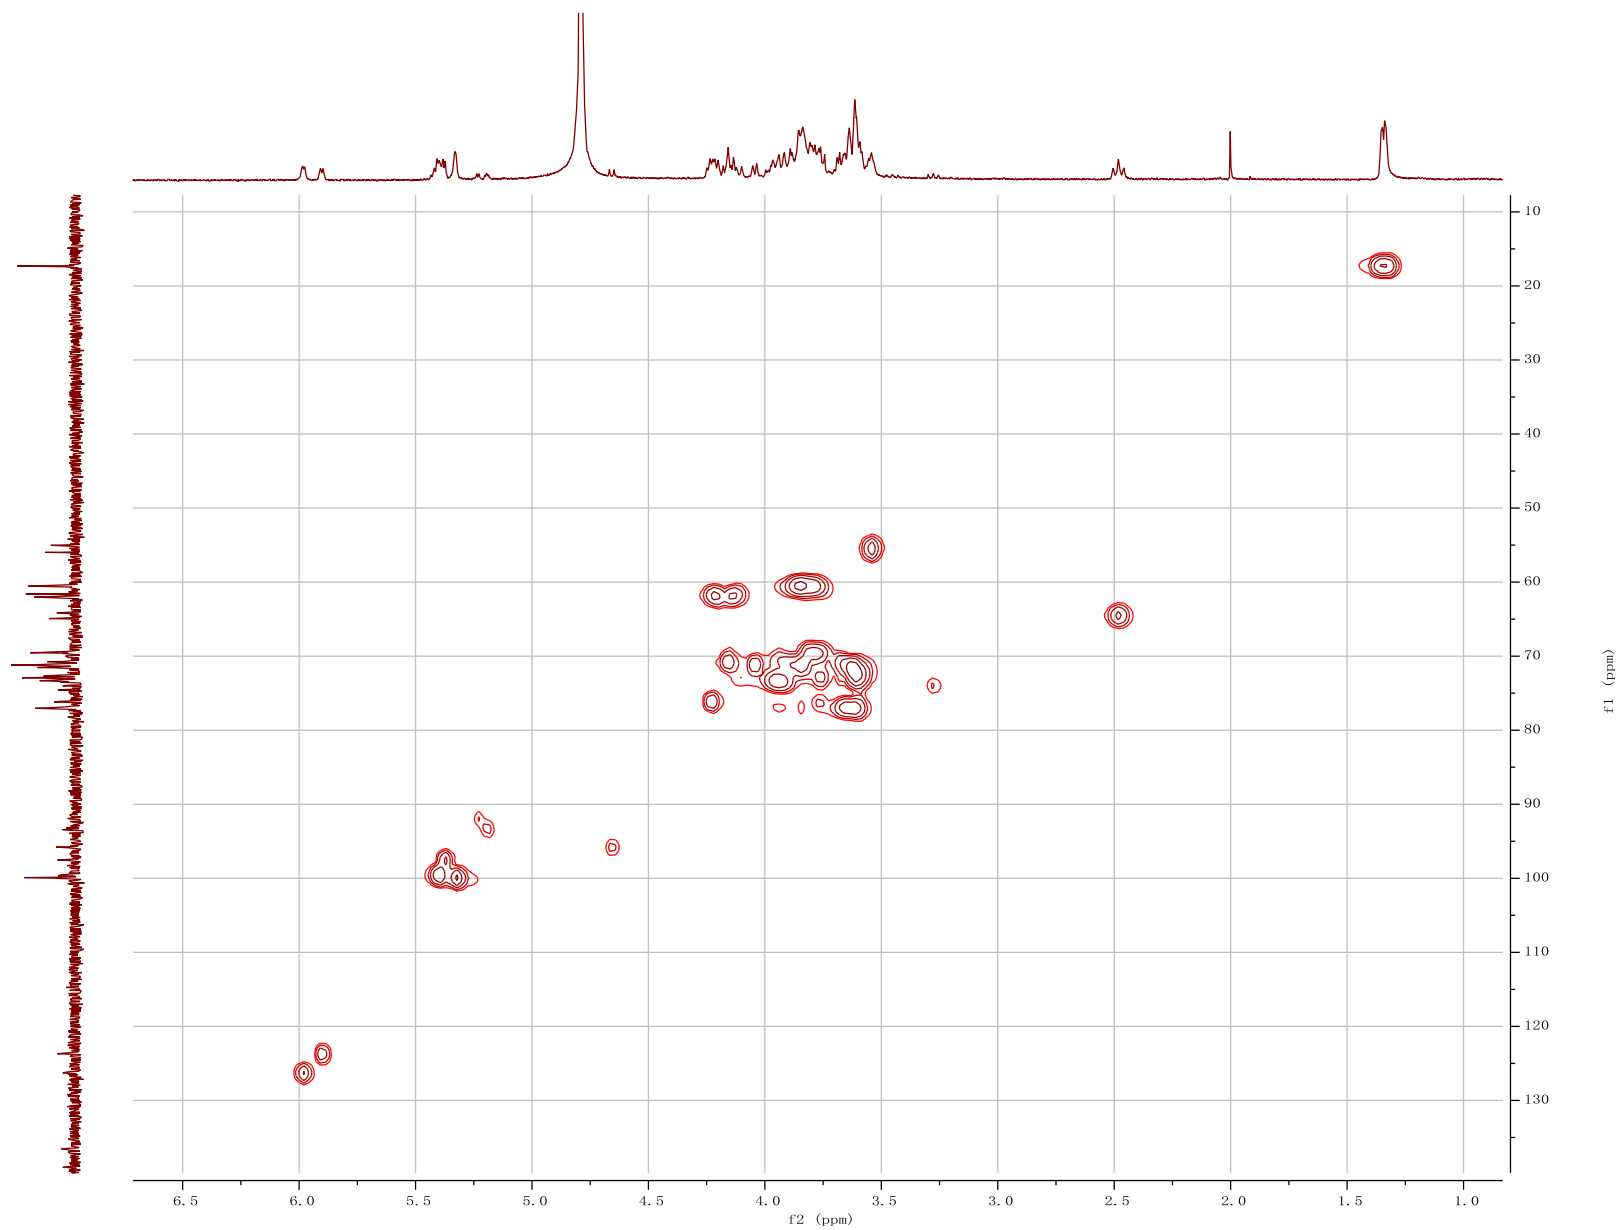

**Figure S21.** HSQC spectrum of compound **10** (500 MHz, D<sub>2</sub>O).

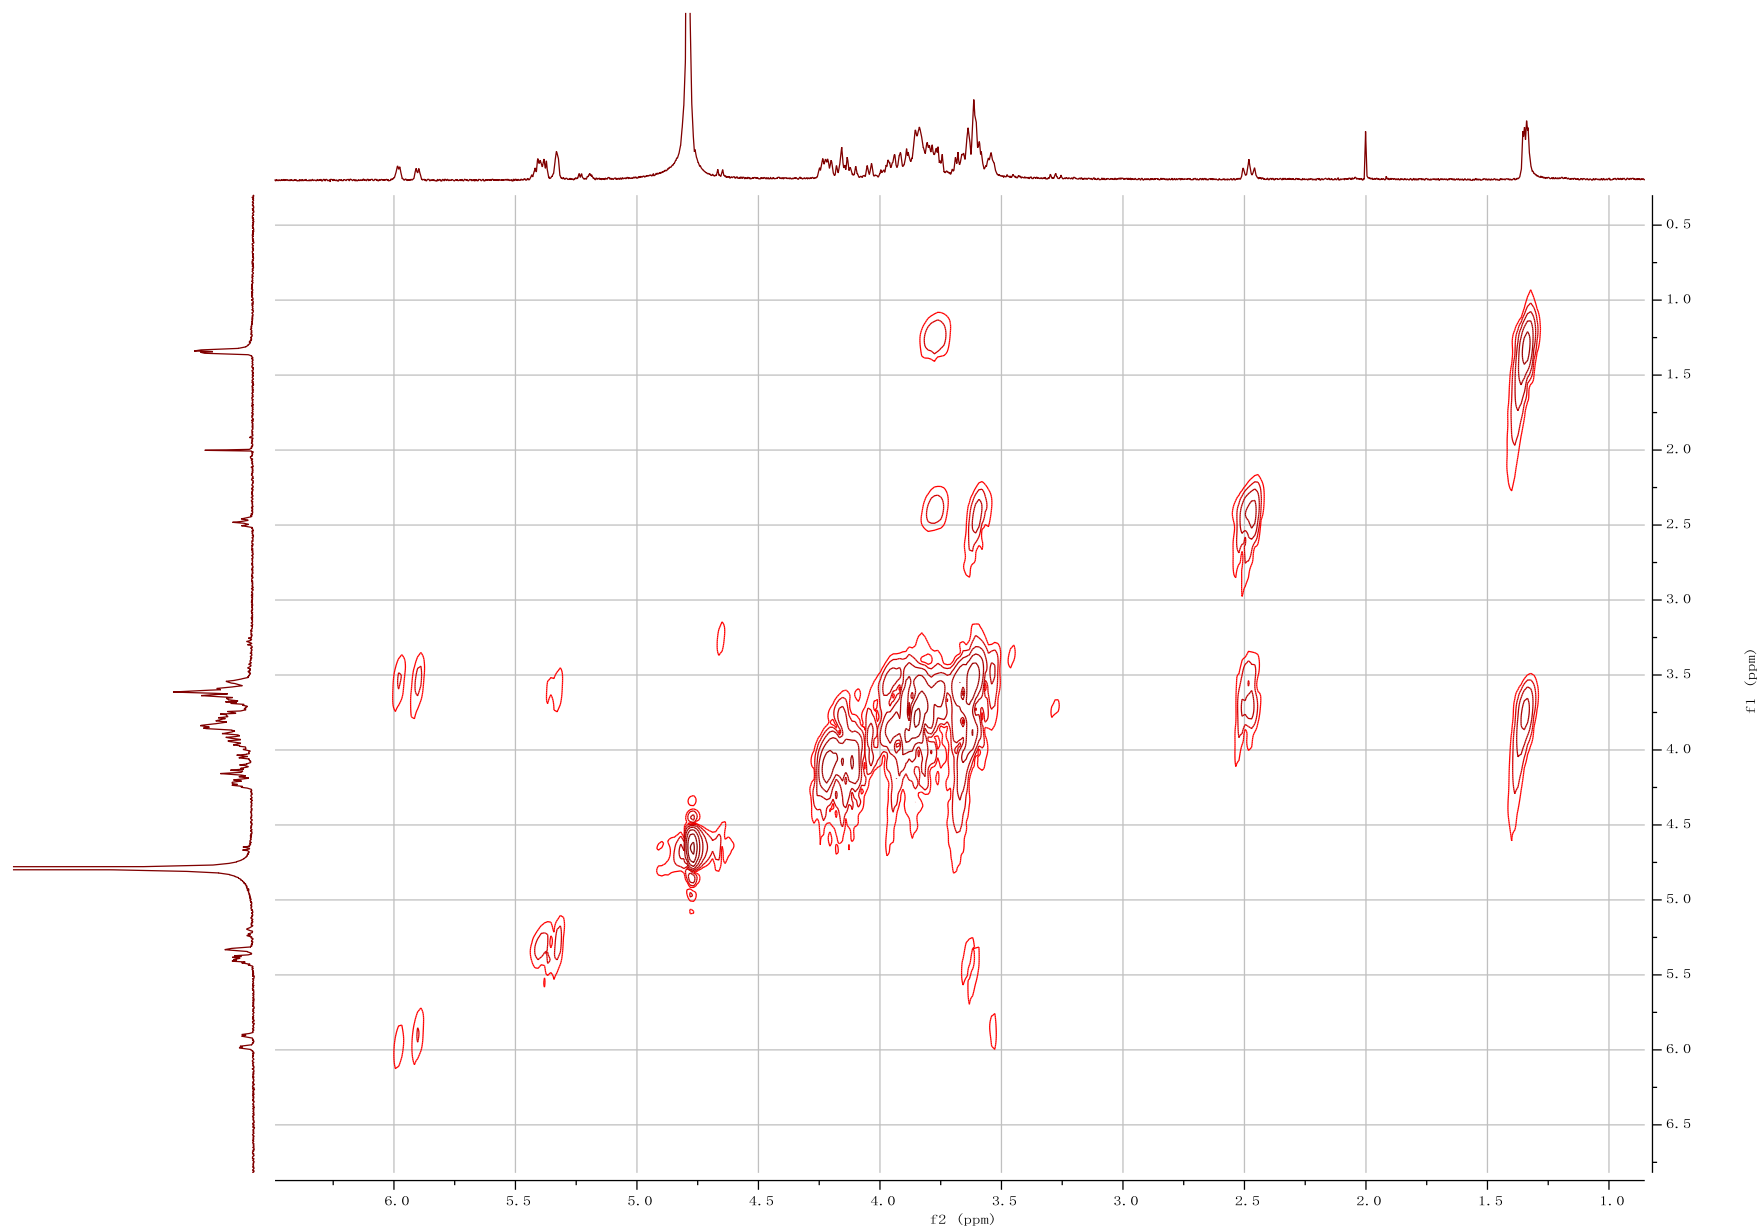

**Figure S22.**  $^1\text{H}$ - $^1\text{H}$  COSY spectrum of compound **10** (500 MHz,  $\text{D}_2\text{O}$ ).

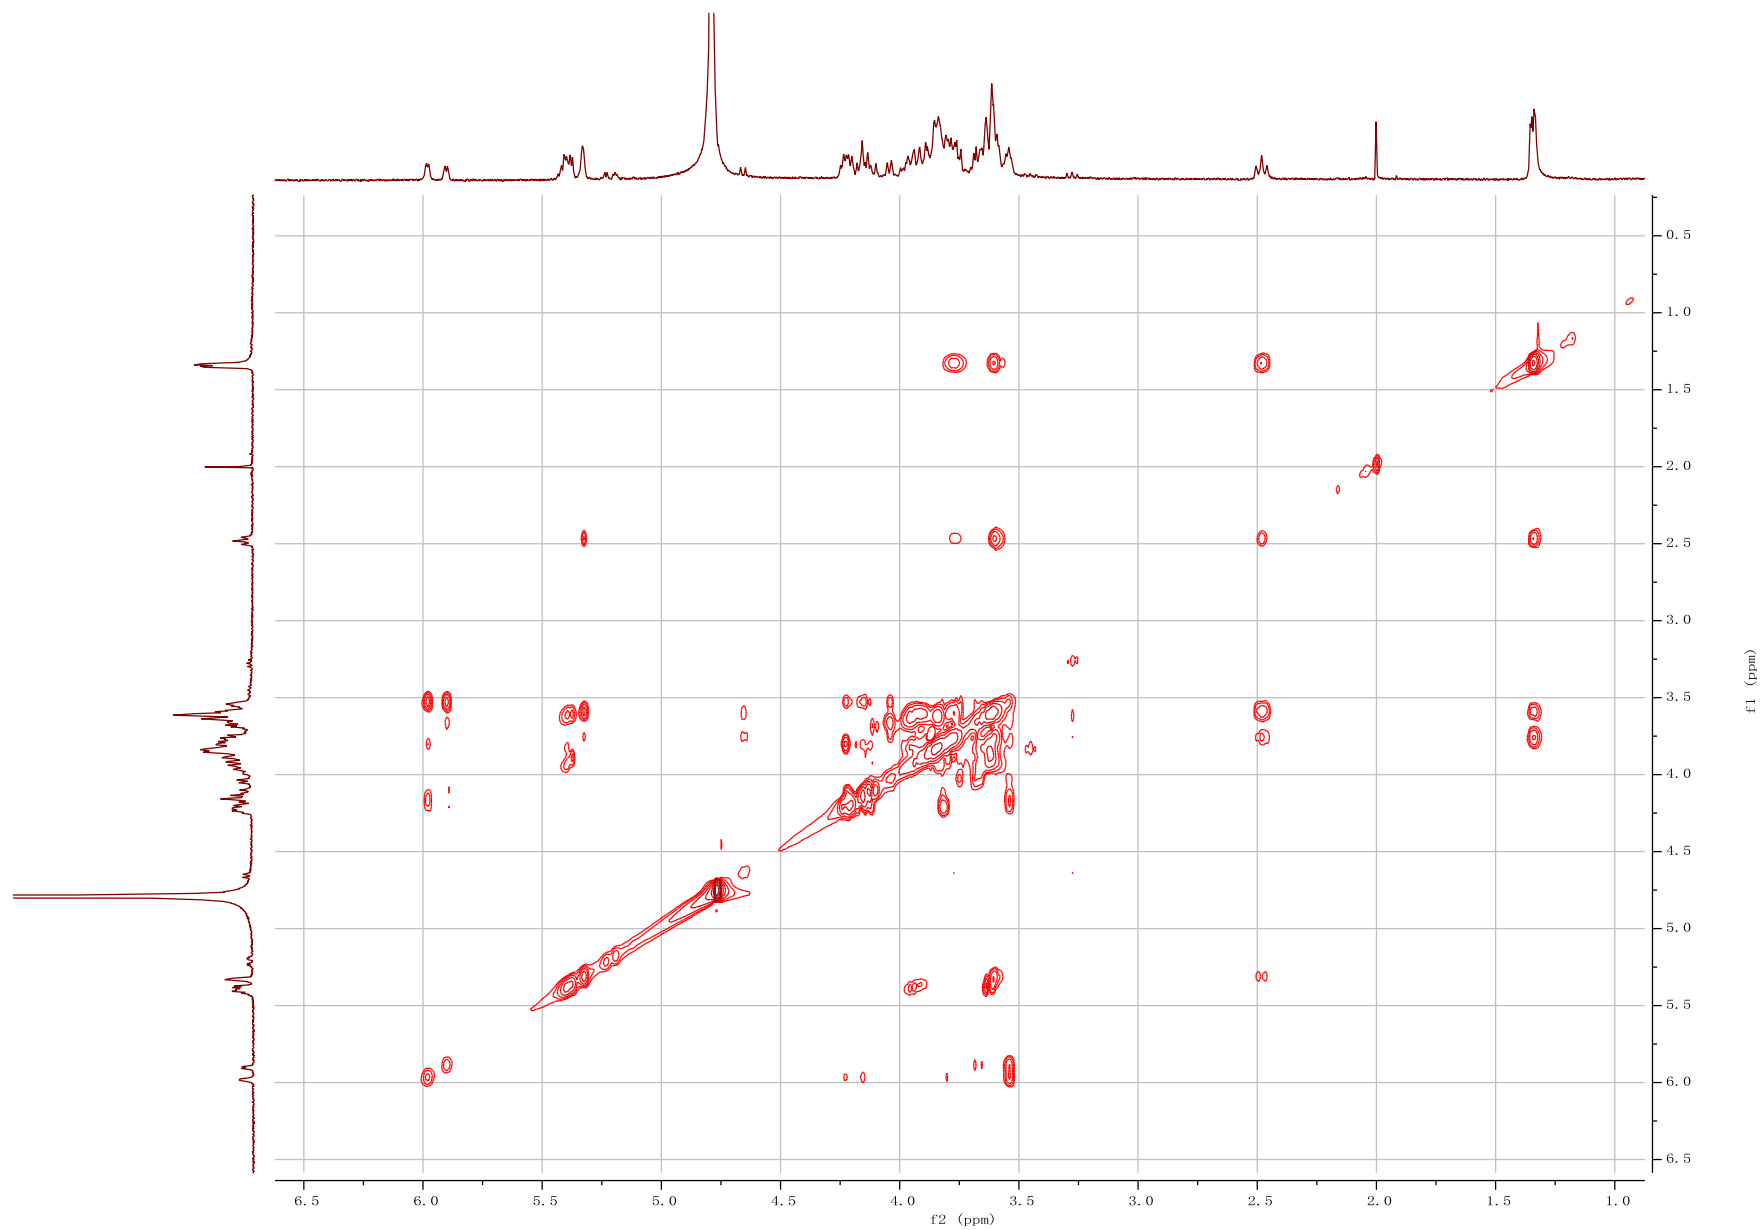

**Figure S23.** 2D-TOCSY spectrum of compound **10** (500 MHz, D<sub>2</sub>O).



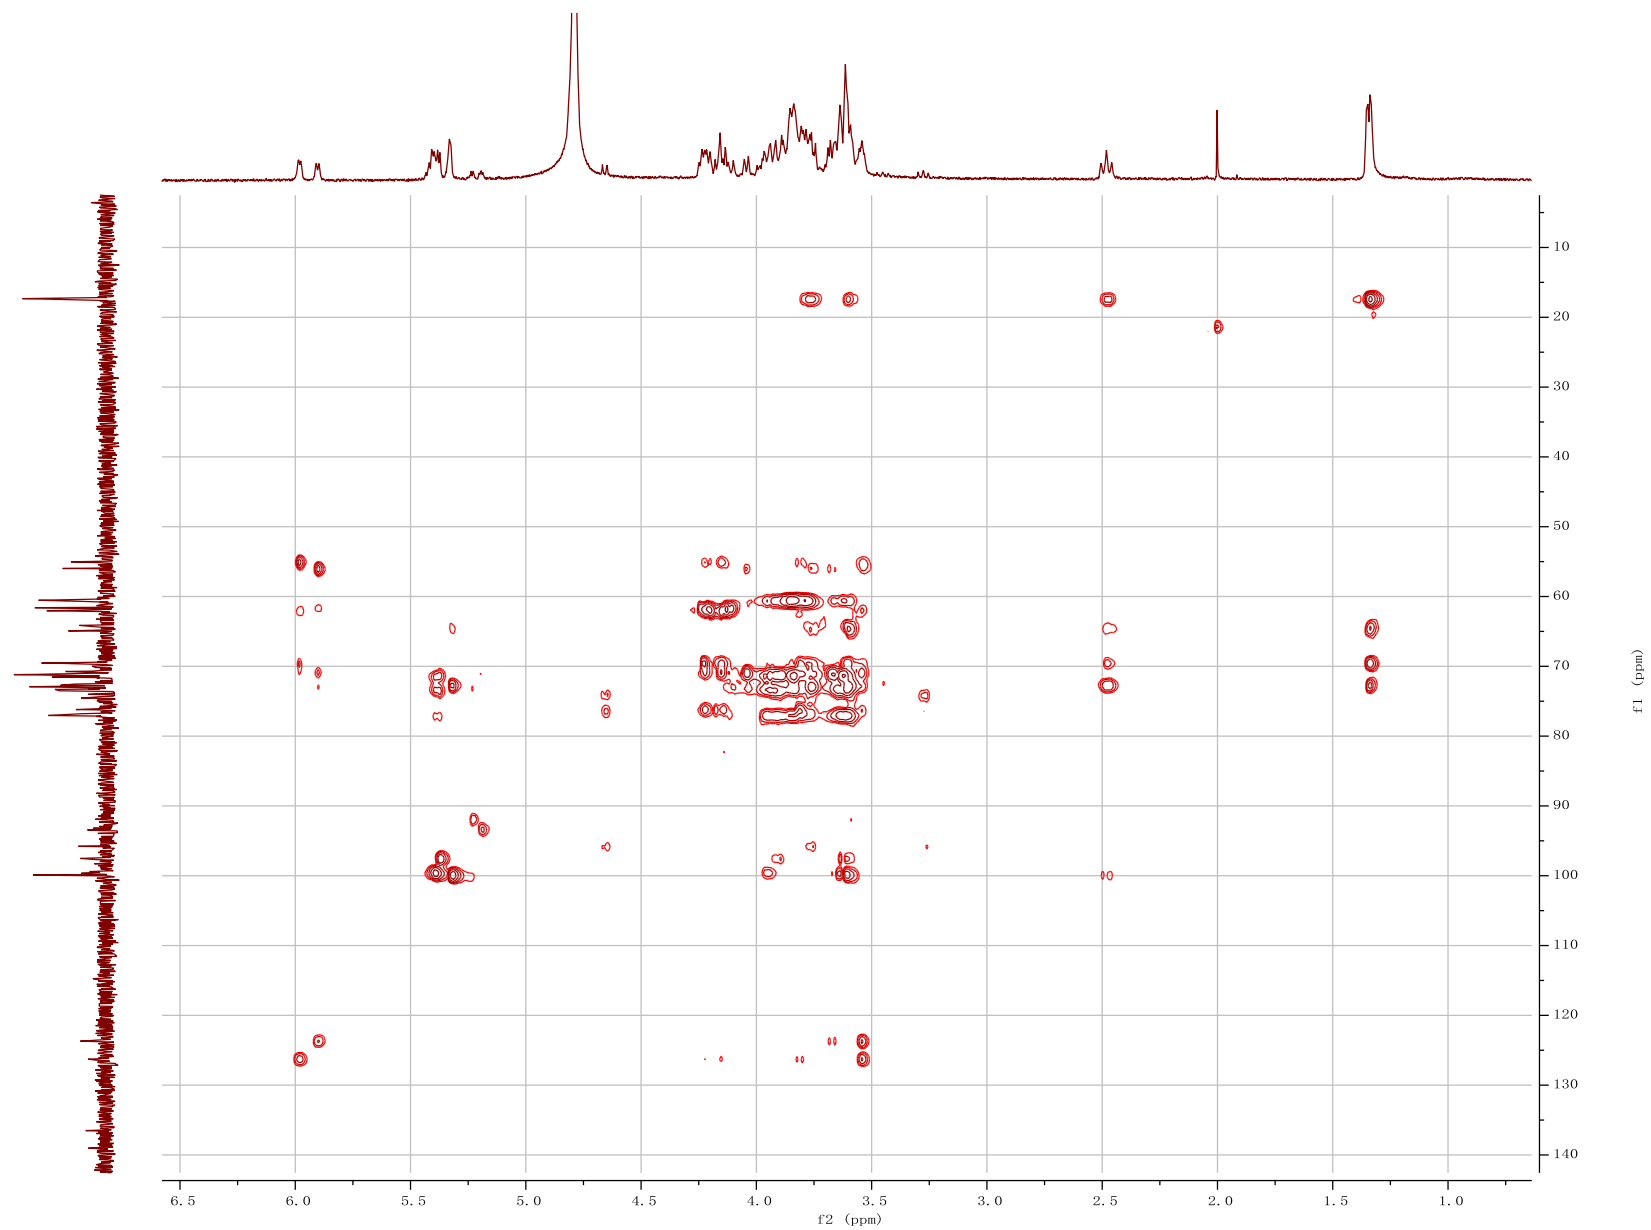

**Figure S24.** HSQC-TOCSY spectrum of compound **10** (500 MHz,  $\text{D}_2\text{O}$ ).

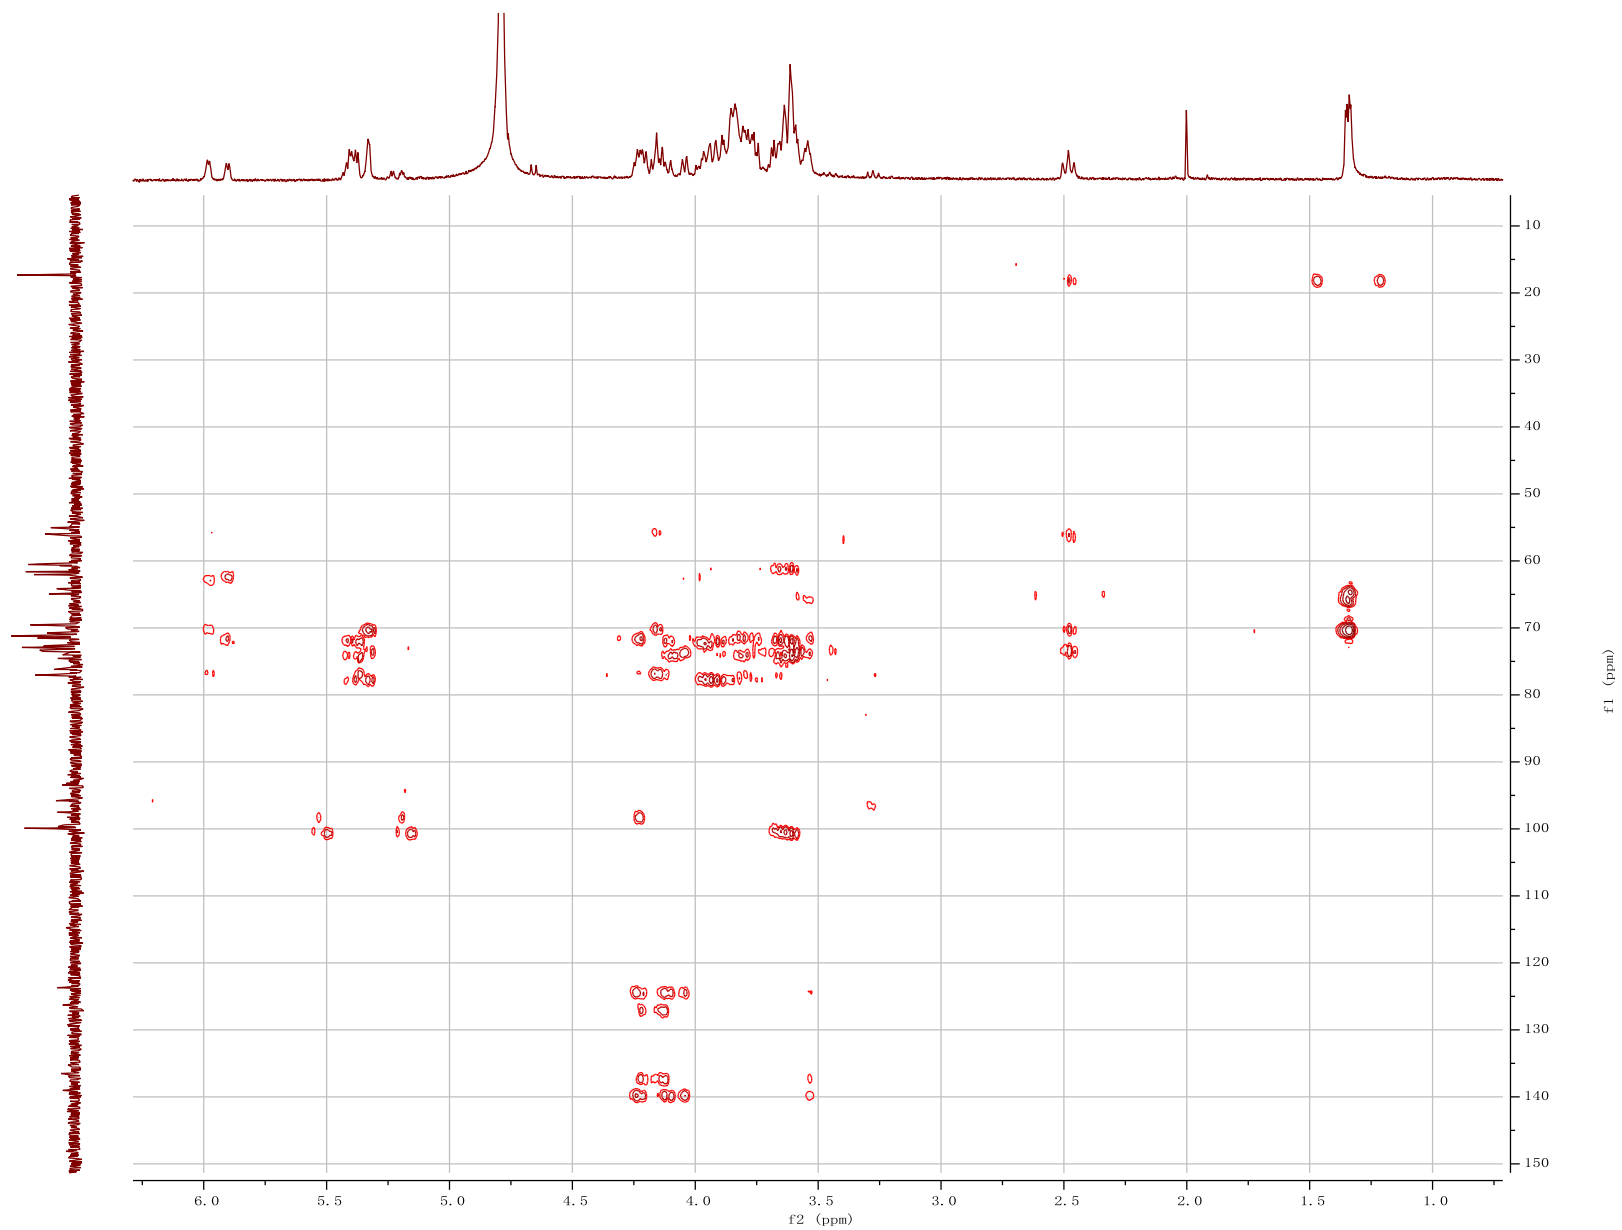

**Figure S25.** HMBC spectrum of compound **10** (500 MHz, D<sub>2</sub>O).

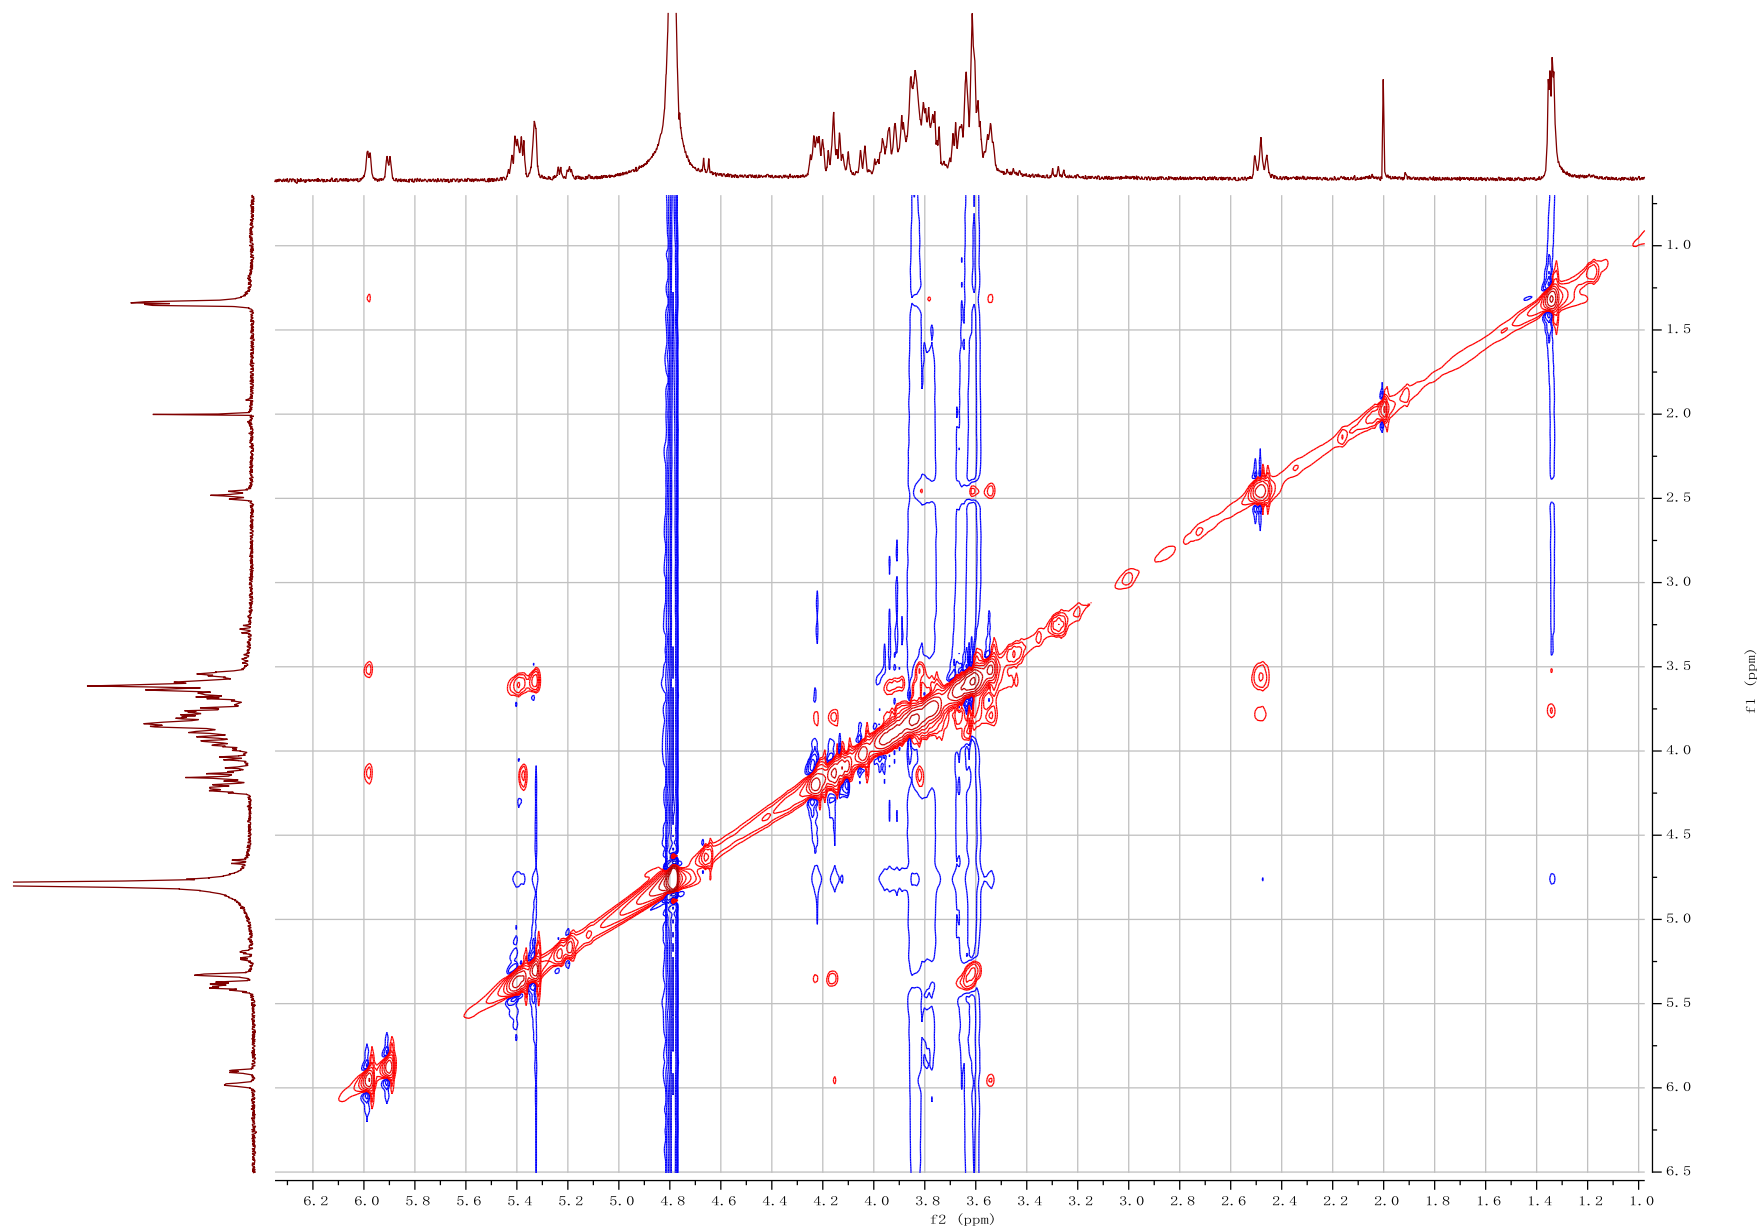

**Figure S26.** NOESY spectrum of compound **10** (500 MHz, D<sub>2</sub>O).

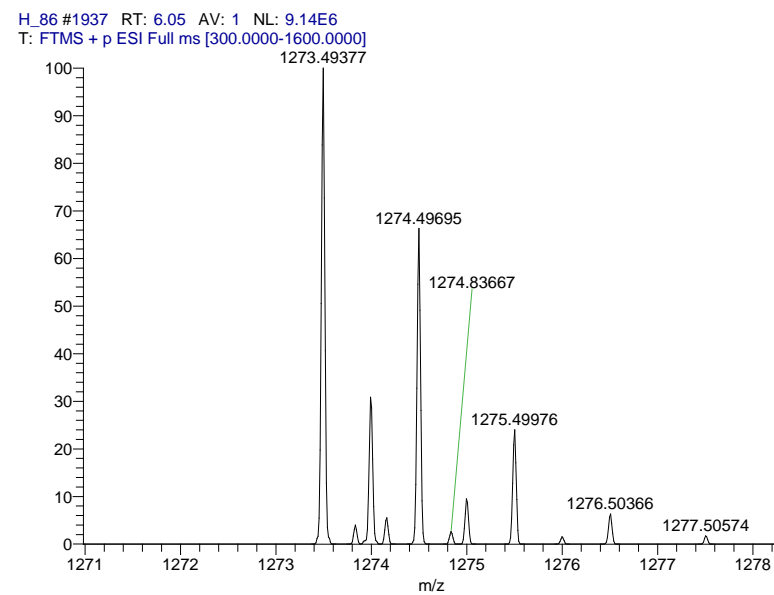

**Figure S27.** HRESIMS spectrum of compound **10**.

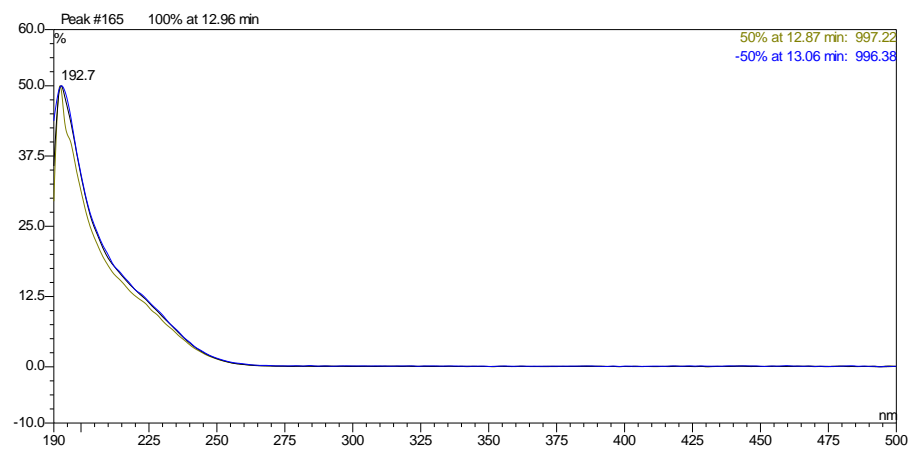

**Figure S28.** UV spectrum of compound **10**.

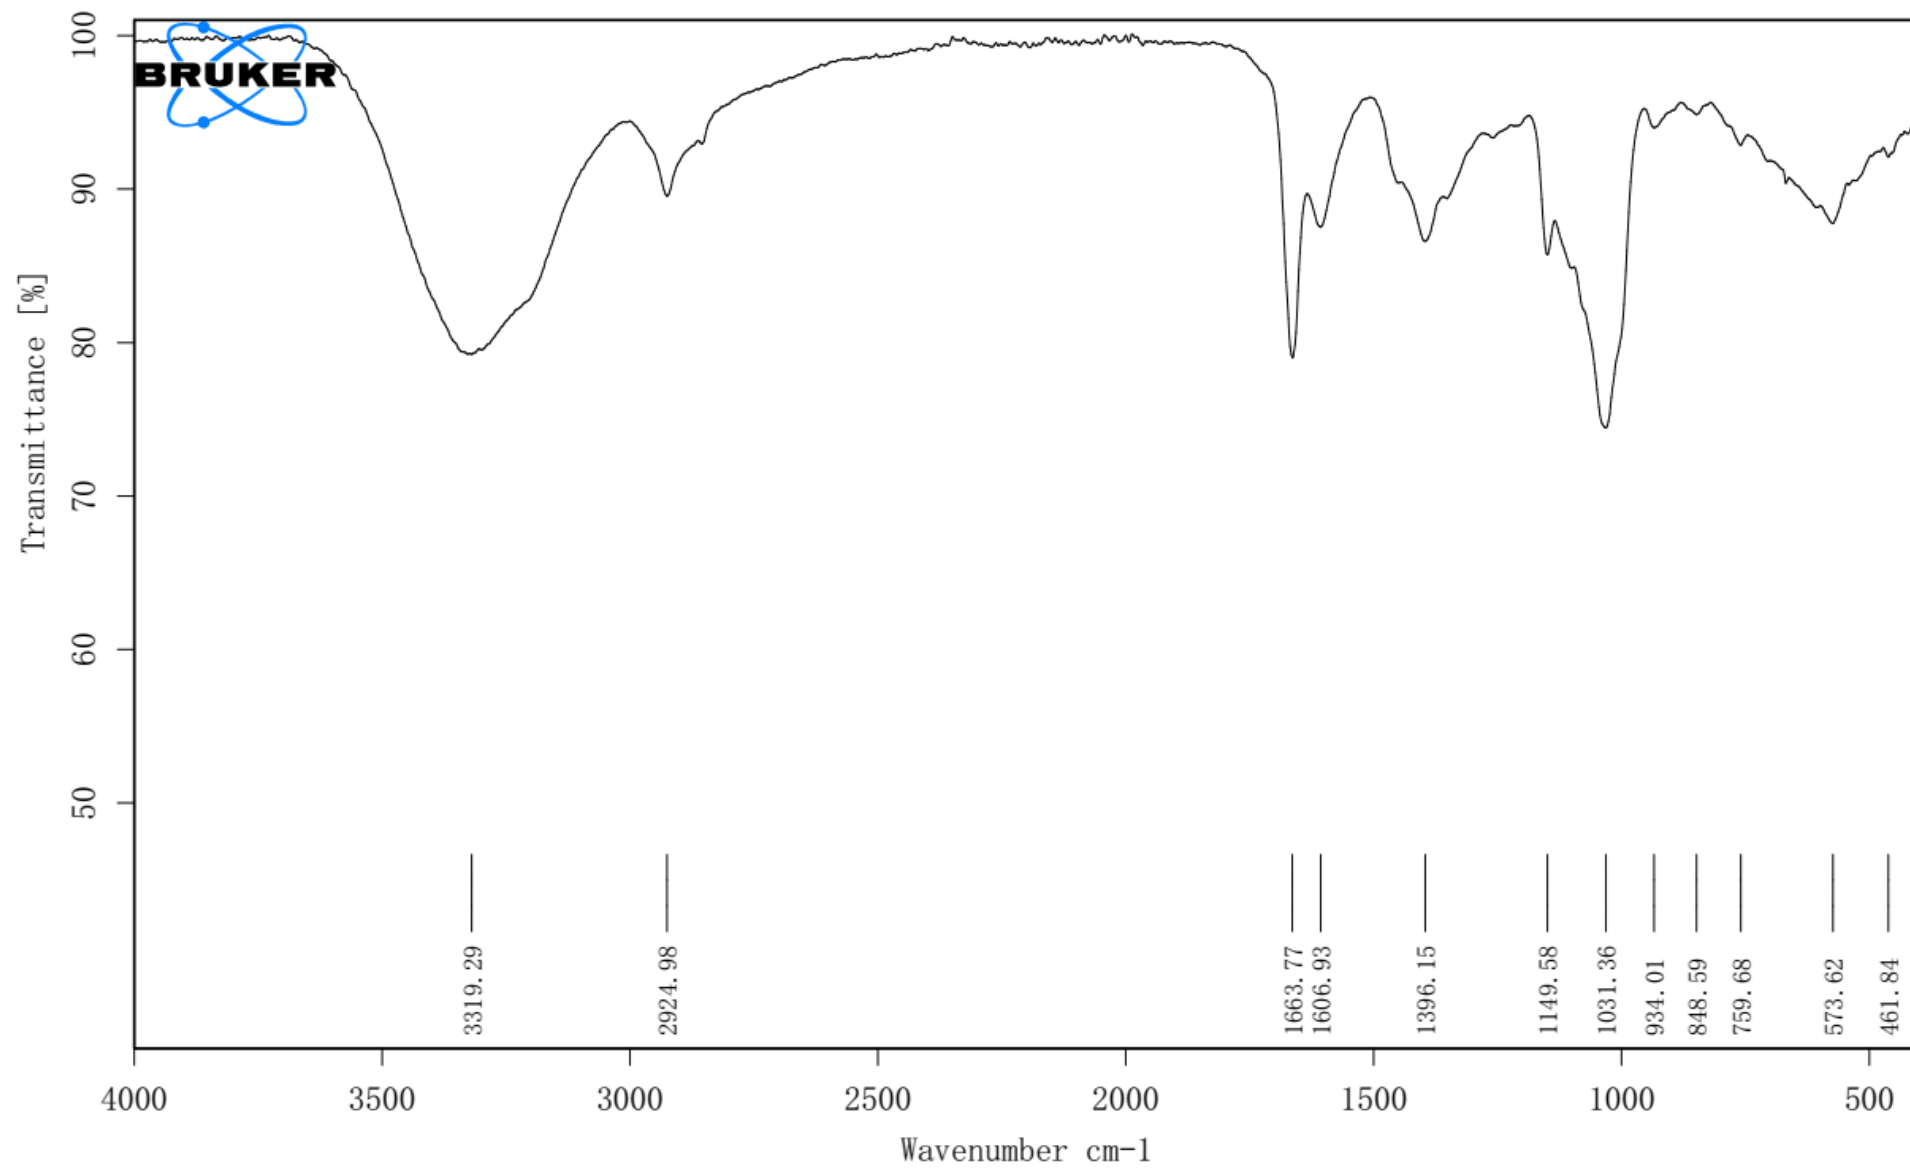

**Figure S29.** IR spectrum of compound **10**.

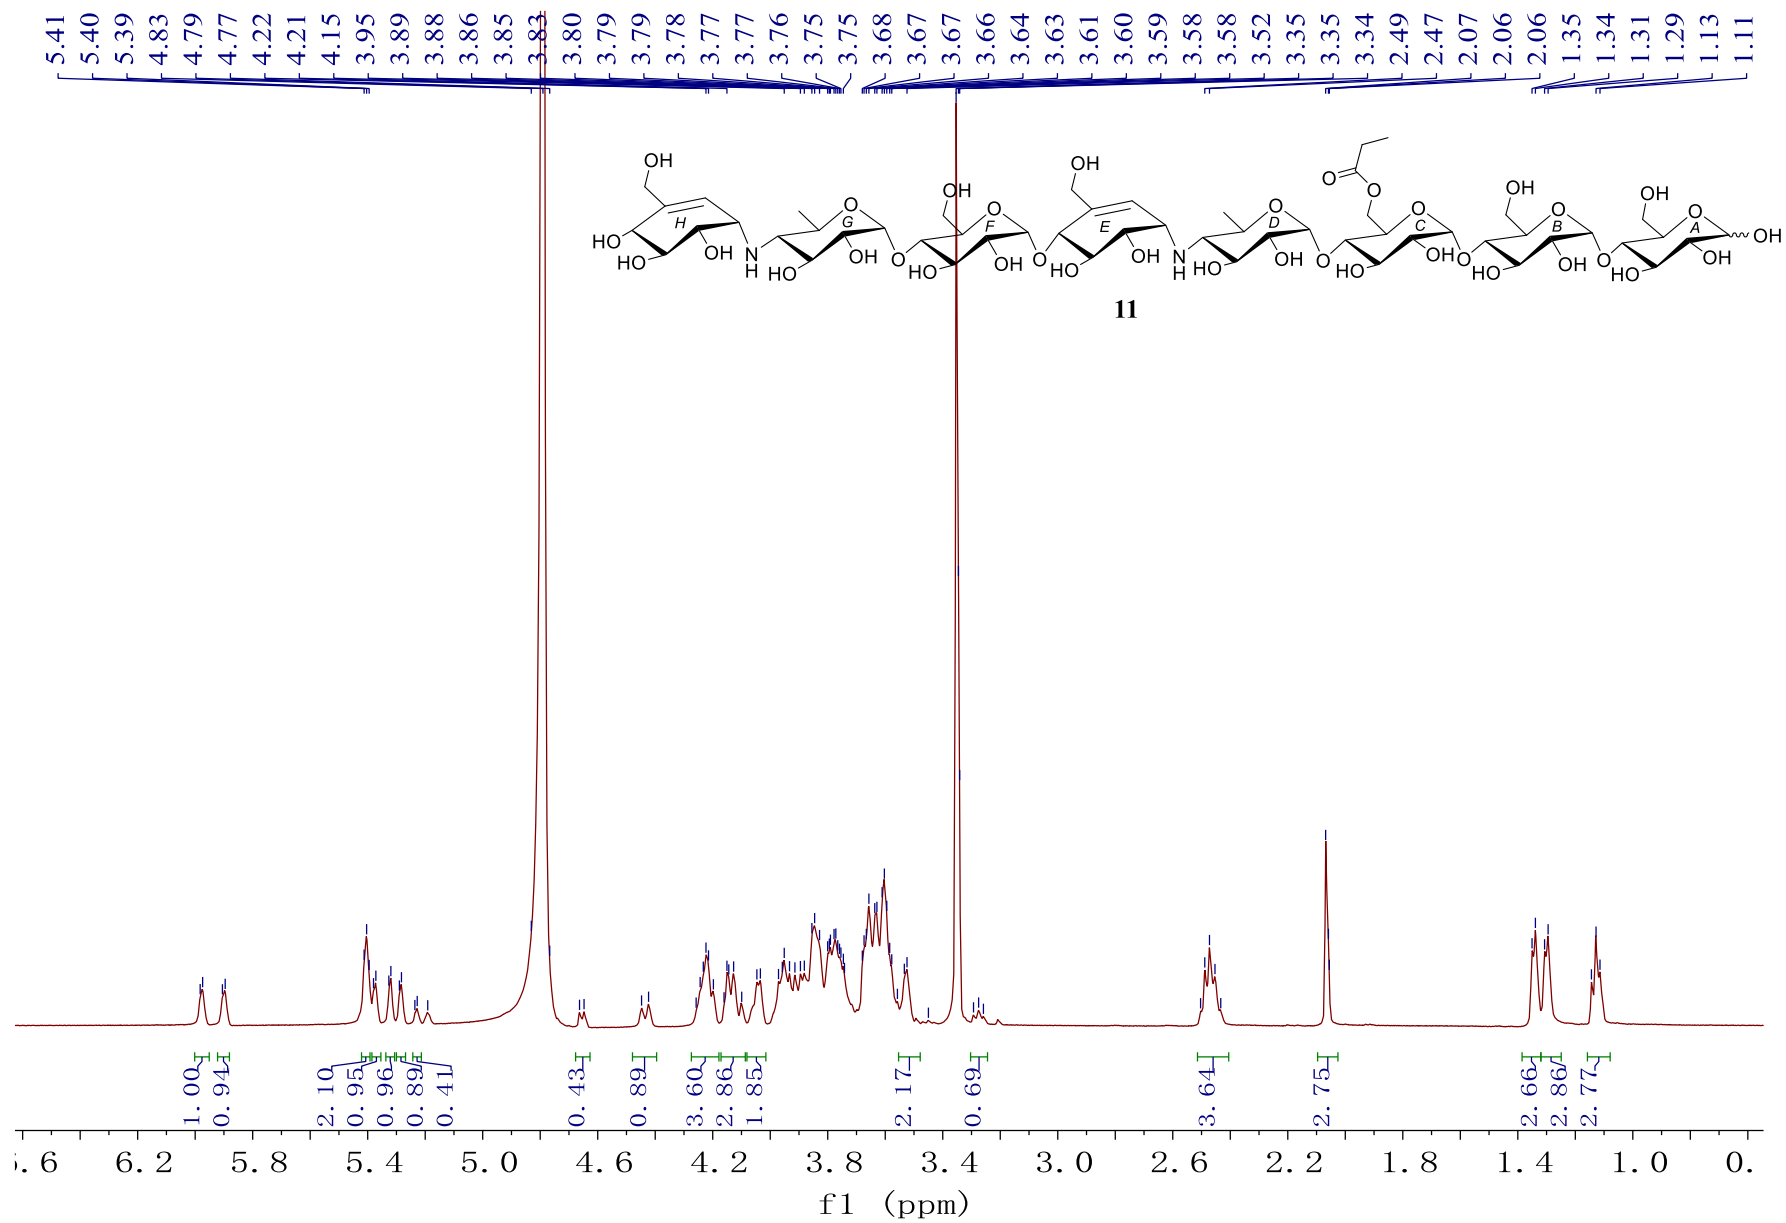

**Figure S30.**  $^1\text{H}$  NMR spectrum of compound **11** (500 MHz,  $\text{D}_2\text{O}$ ).

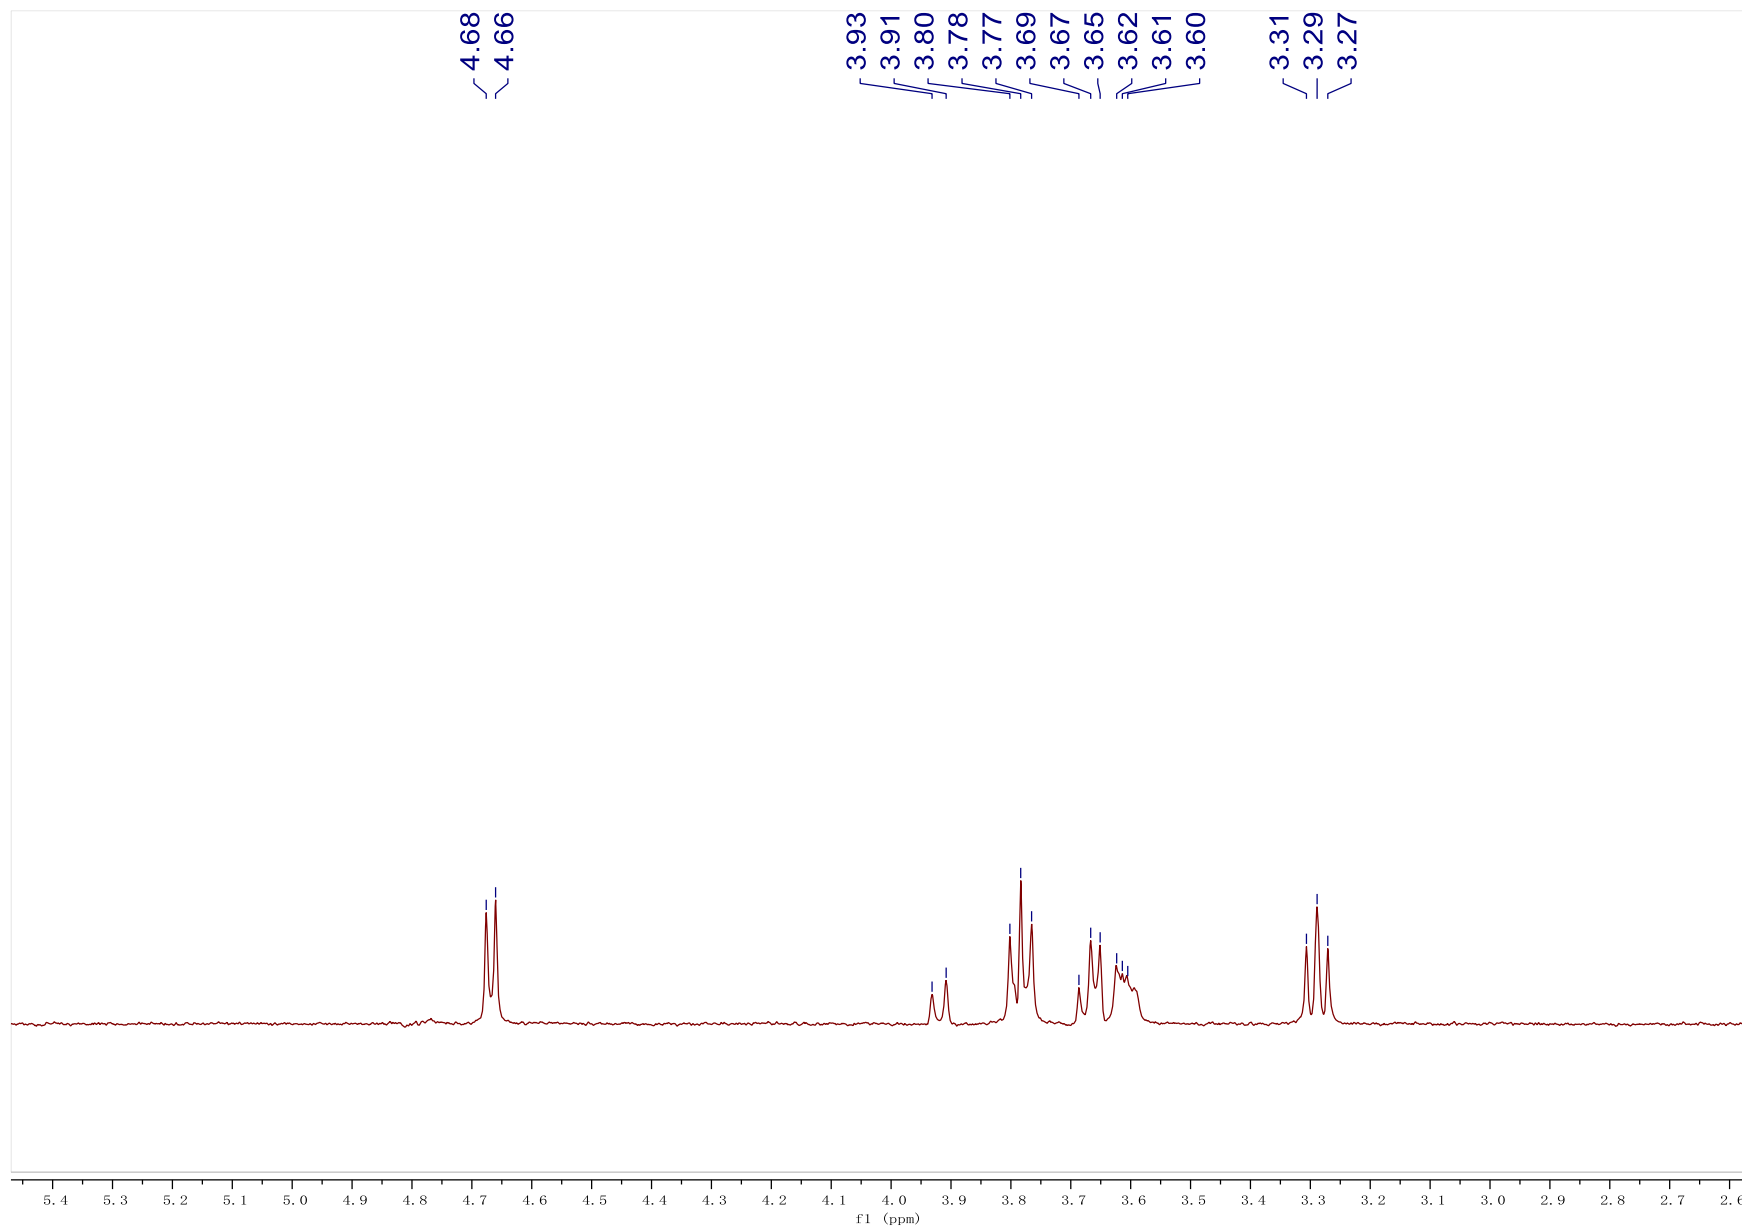

**Figure S31.** 1D-selective TOCSY spectrum of compound **11** (500 MHz, D<sub>2</sub>O, excitation at  $\delta$  4.66, H-A1 $\beta$ ).

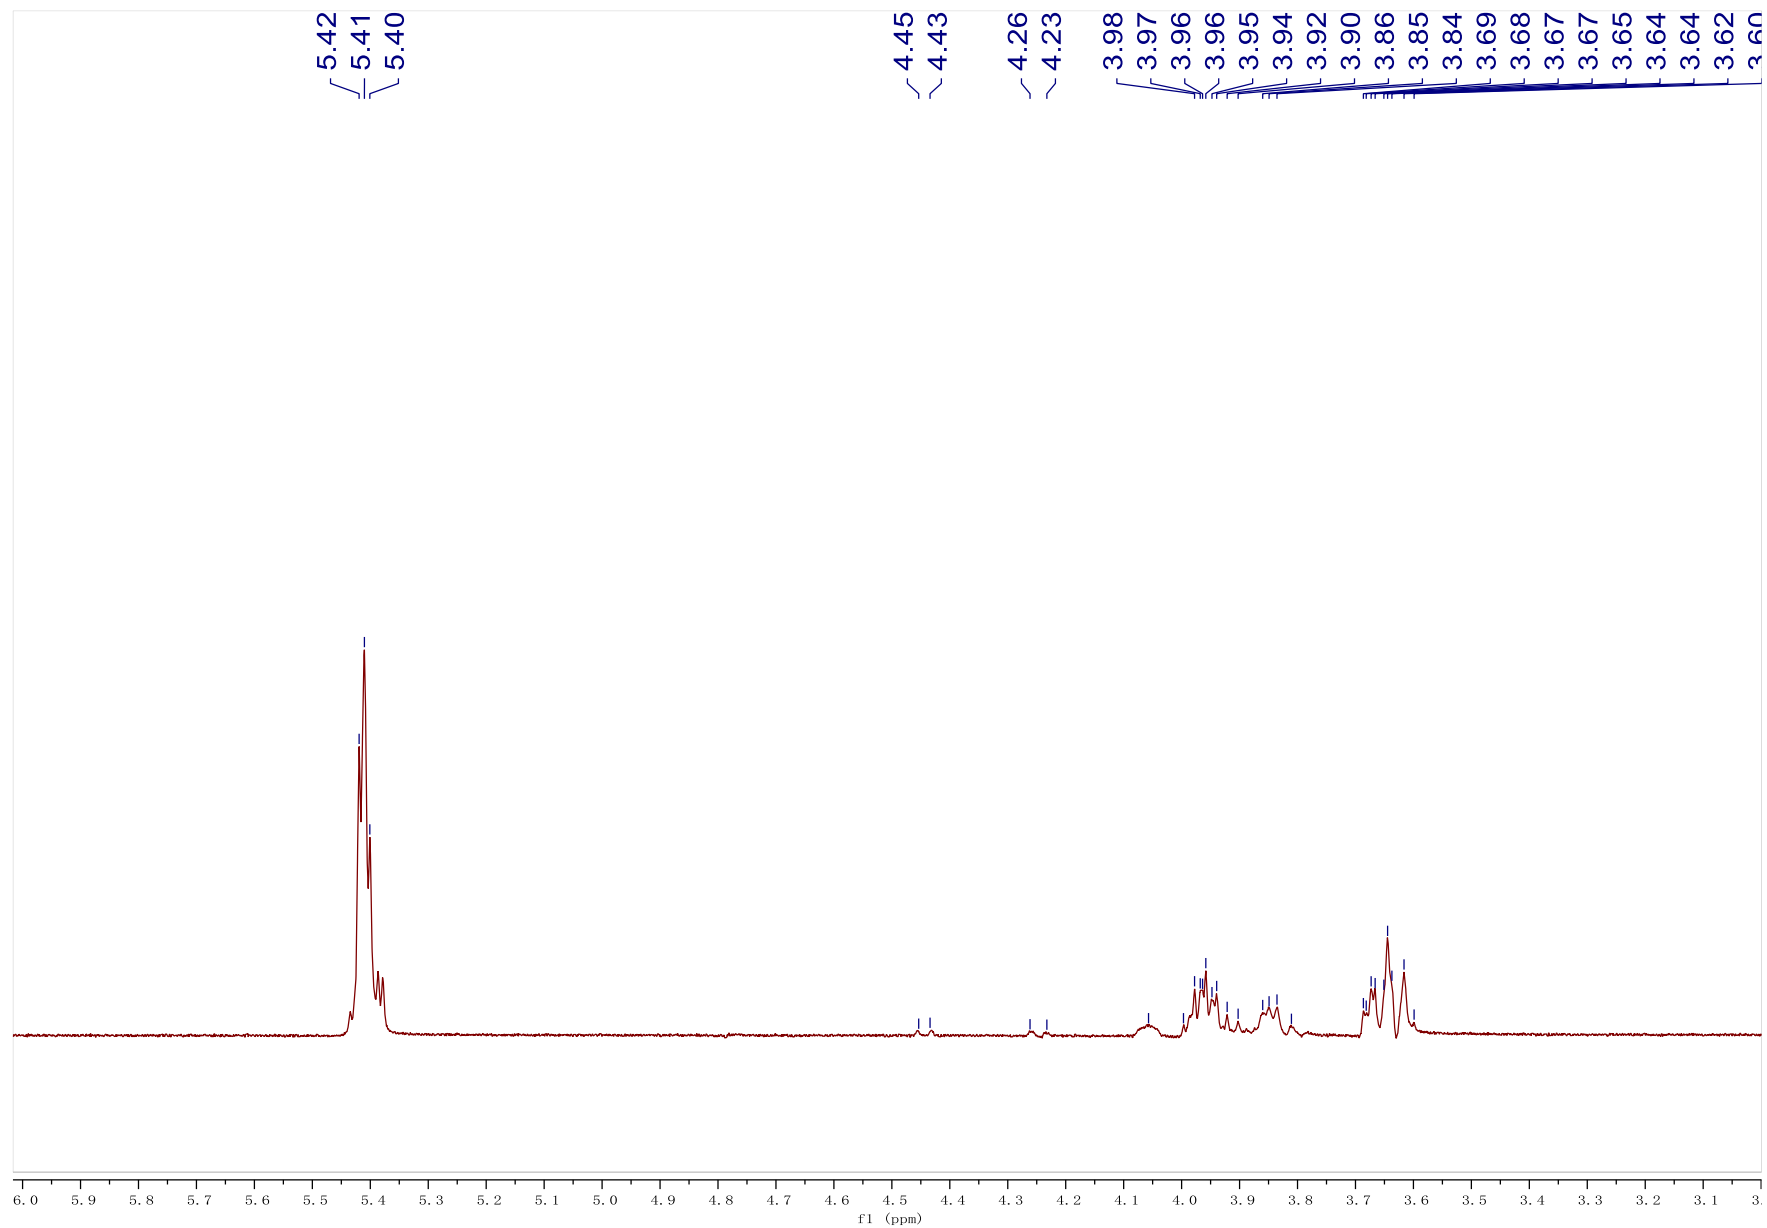

**Figure S32.** 1D-selective TOCSY spectrum of compound **11** (500 MHz, D<sub>2</sub>O, excitation at  $\delta$  5.41, H-**B1** and H-**C1**).



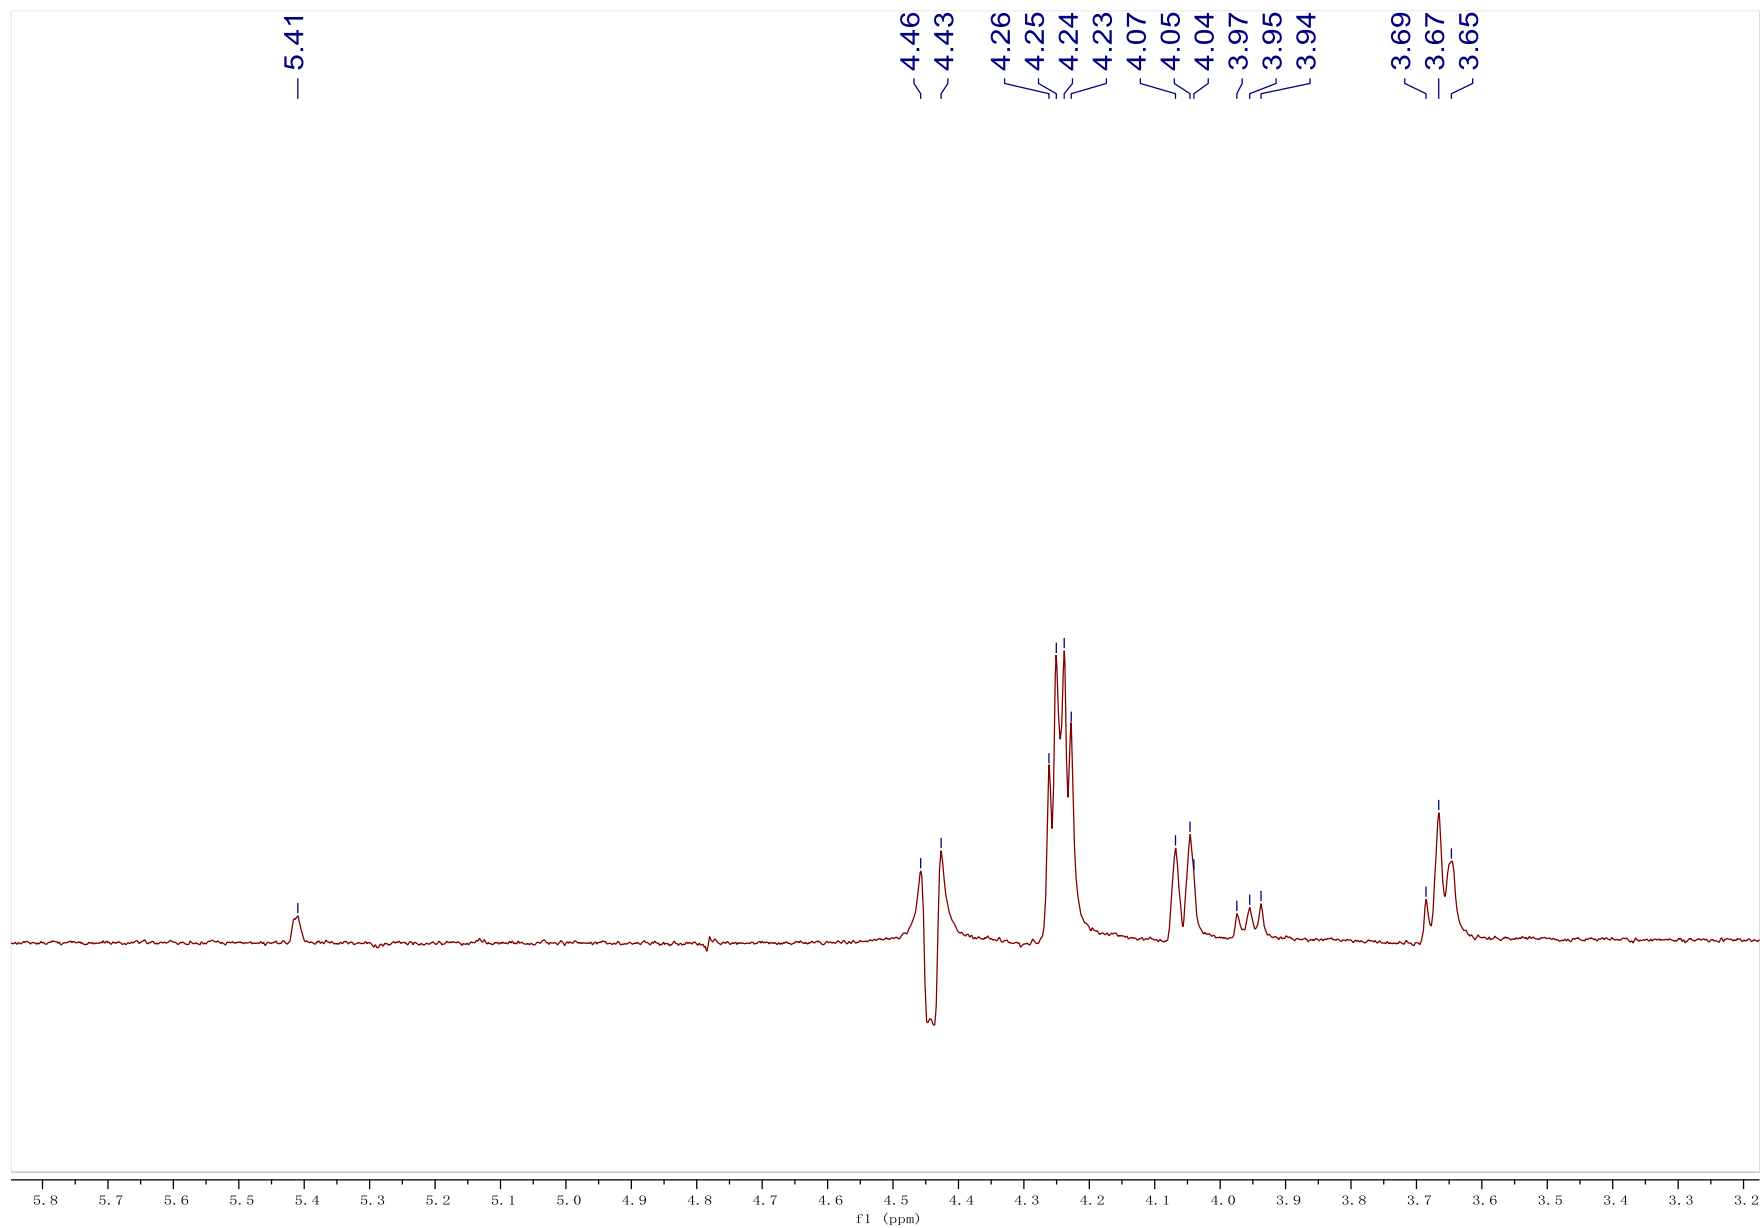

**Figure S33.** 1D-selective TOCSY spectrum of compound **11** (500 MHz, D<sub>2</sub>O, excitation at  $\delta$  4.44, H-C6a).

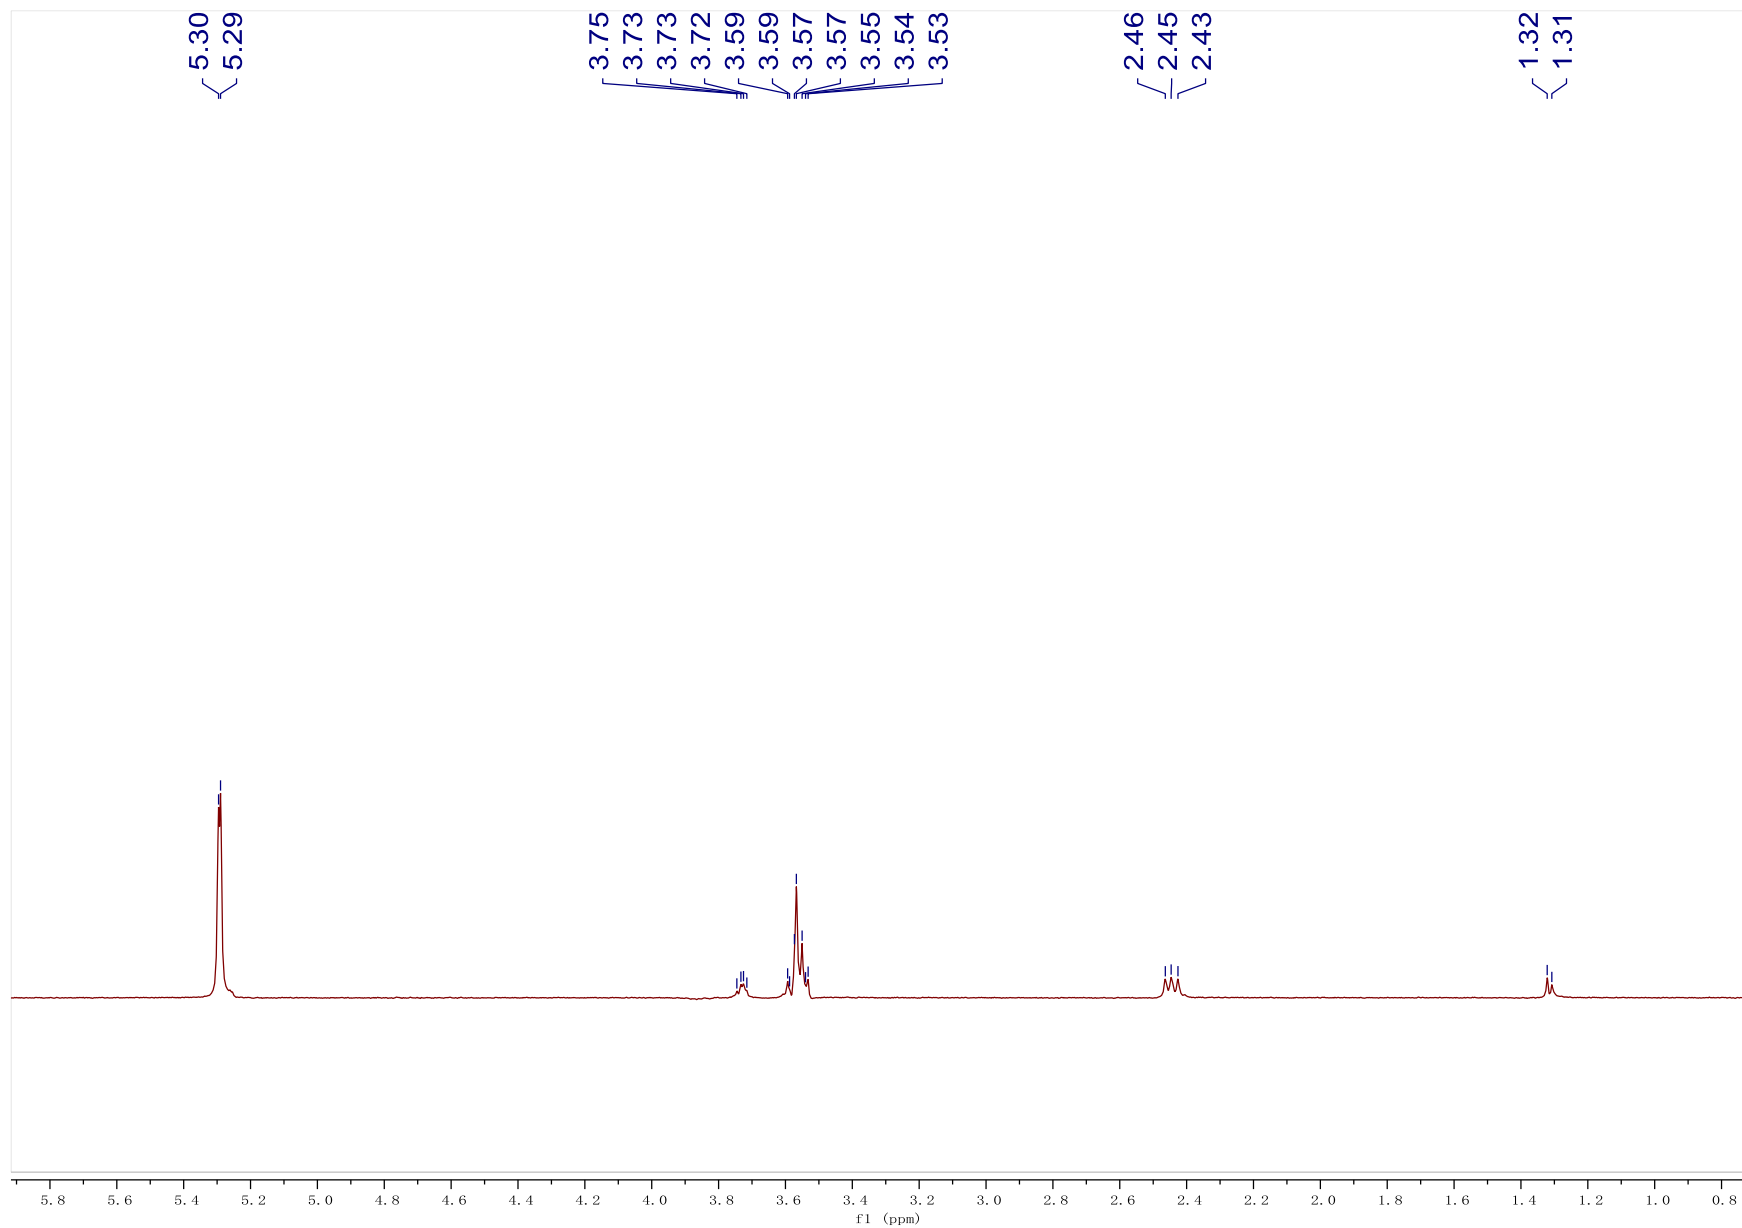

**Figure S34.** 1D-selective TOCSY spectrum of compound **11** (500 MHz, D<sub>2</sub>O, excitation at  $\delta$  5.29, H-D1).

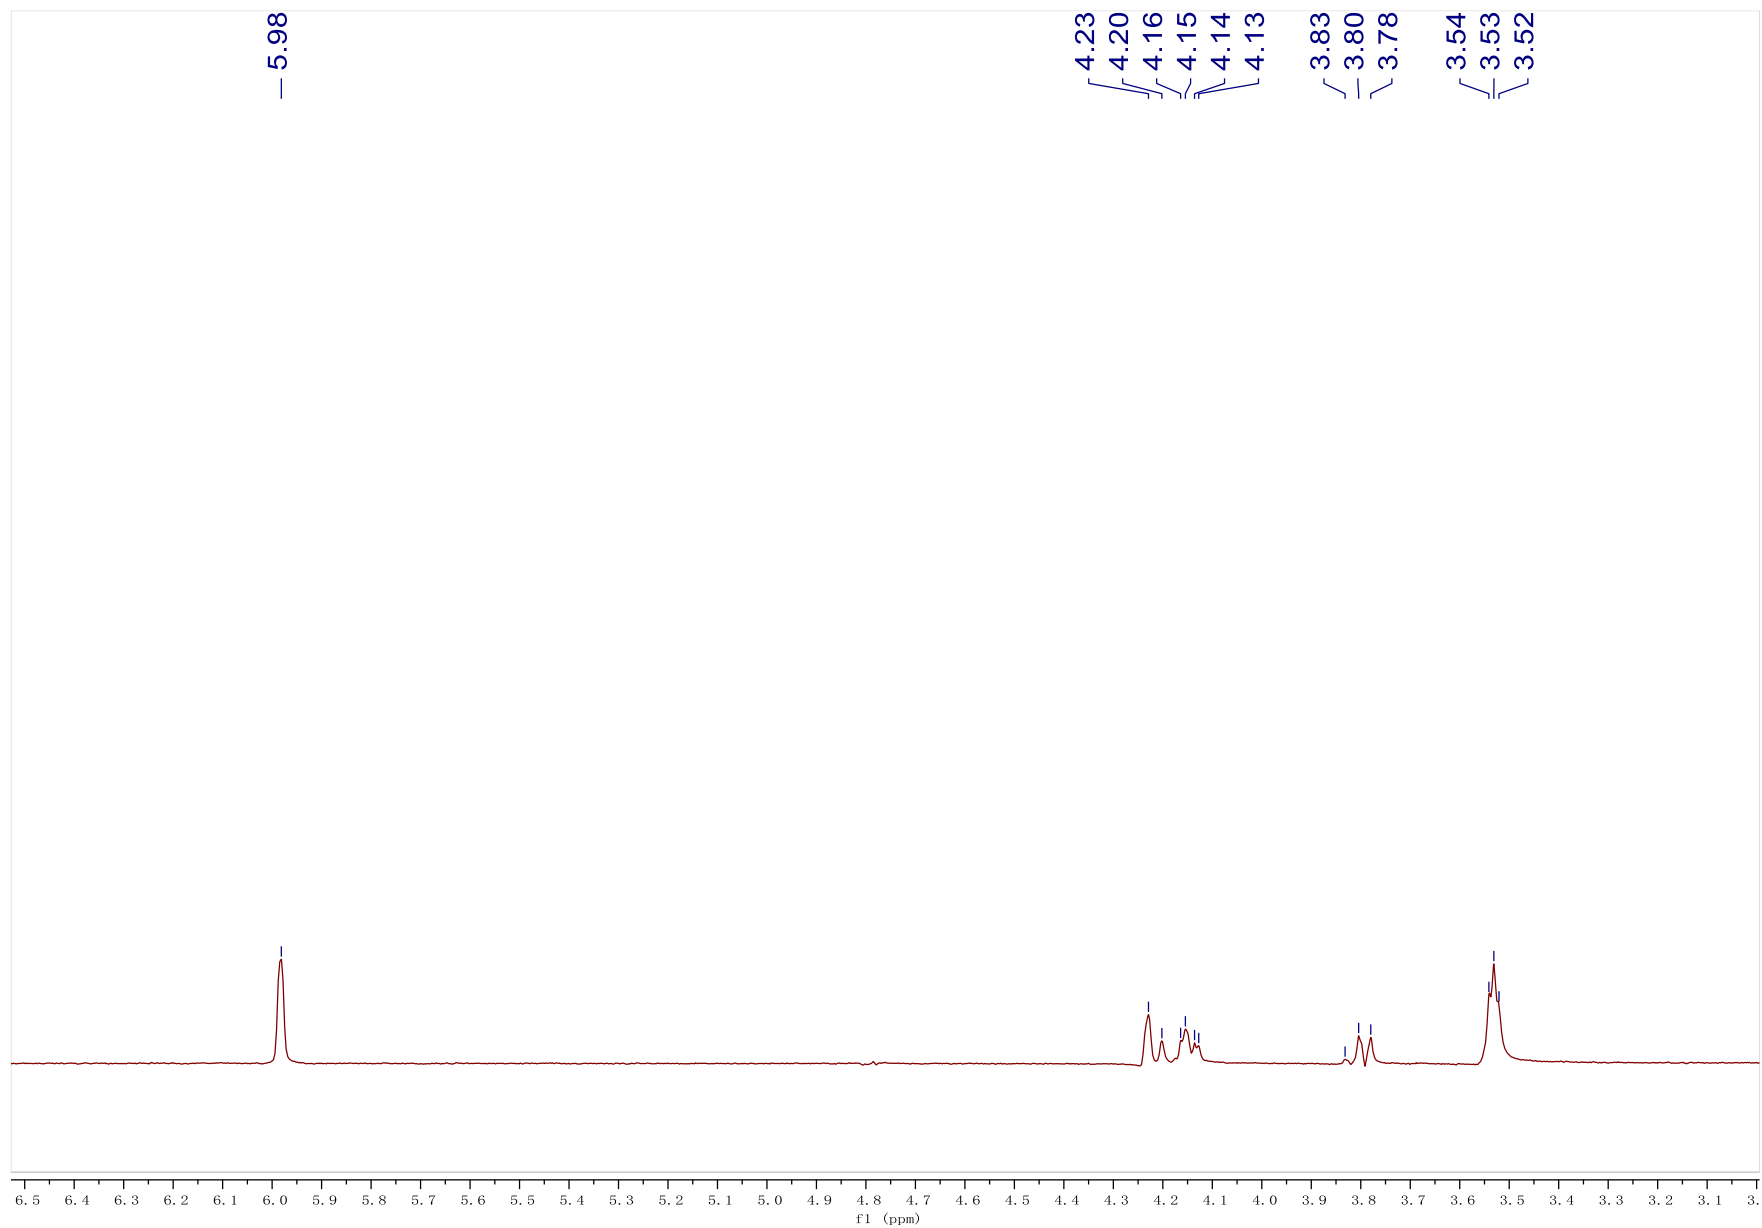

**Figure S35.** 1D-selective TOCSY spectrum of compound **11** (500 MHz, D<sub>2</sub>O, excitation at  $\delta$  5.98, H-E7).

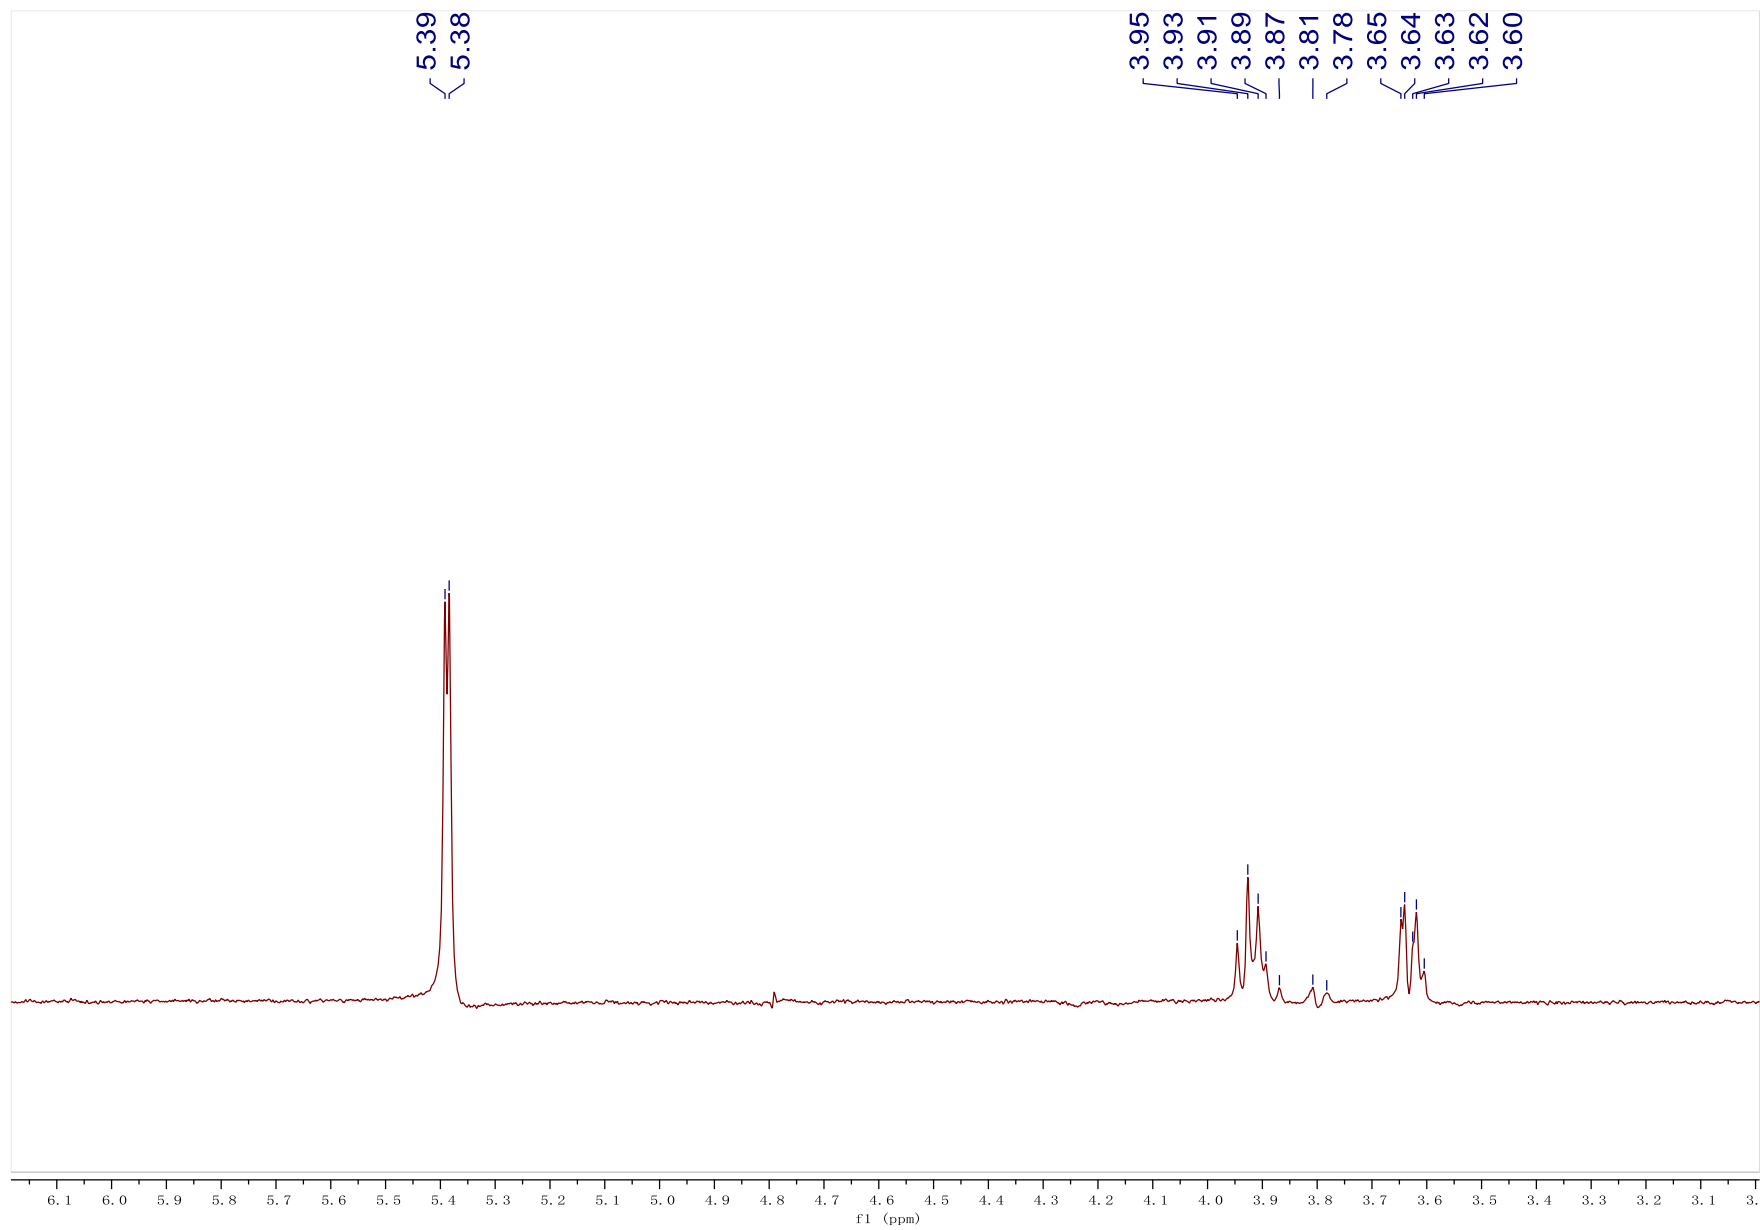

**Figure S36.** 1D-selective TOCSY spectrum of compound **11** (500 MHz, D<sub>2</sub>O, excitation at  $\delta$  5.38, H-F1).

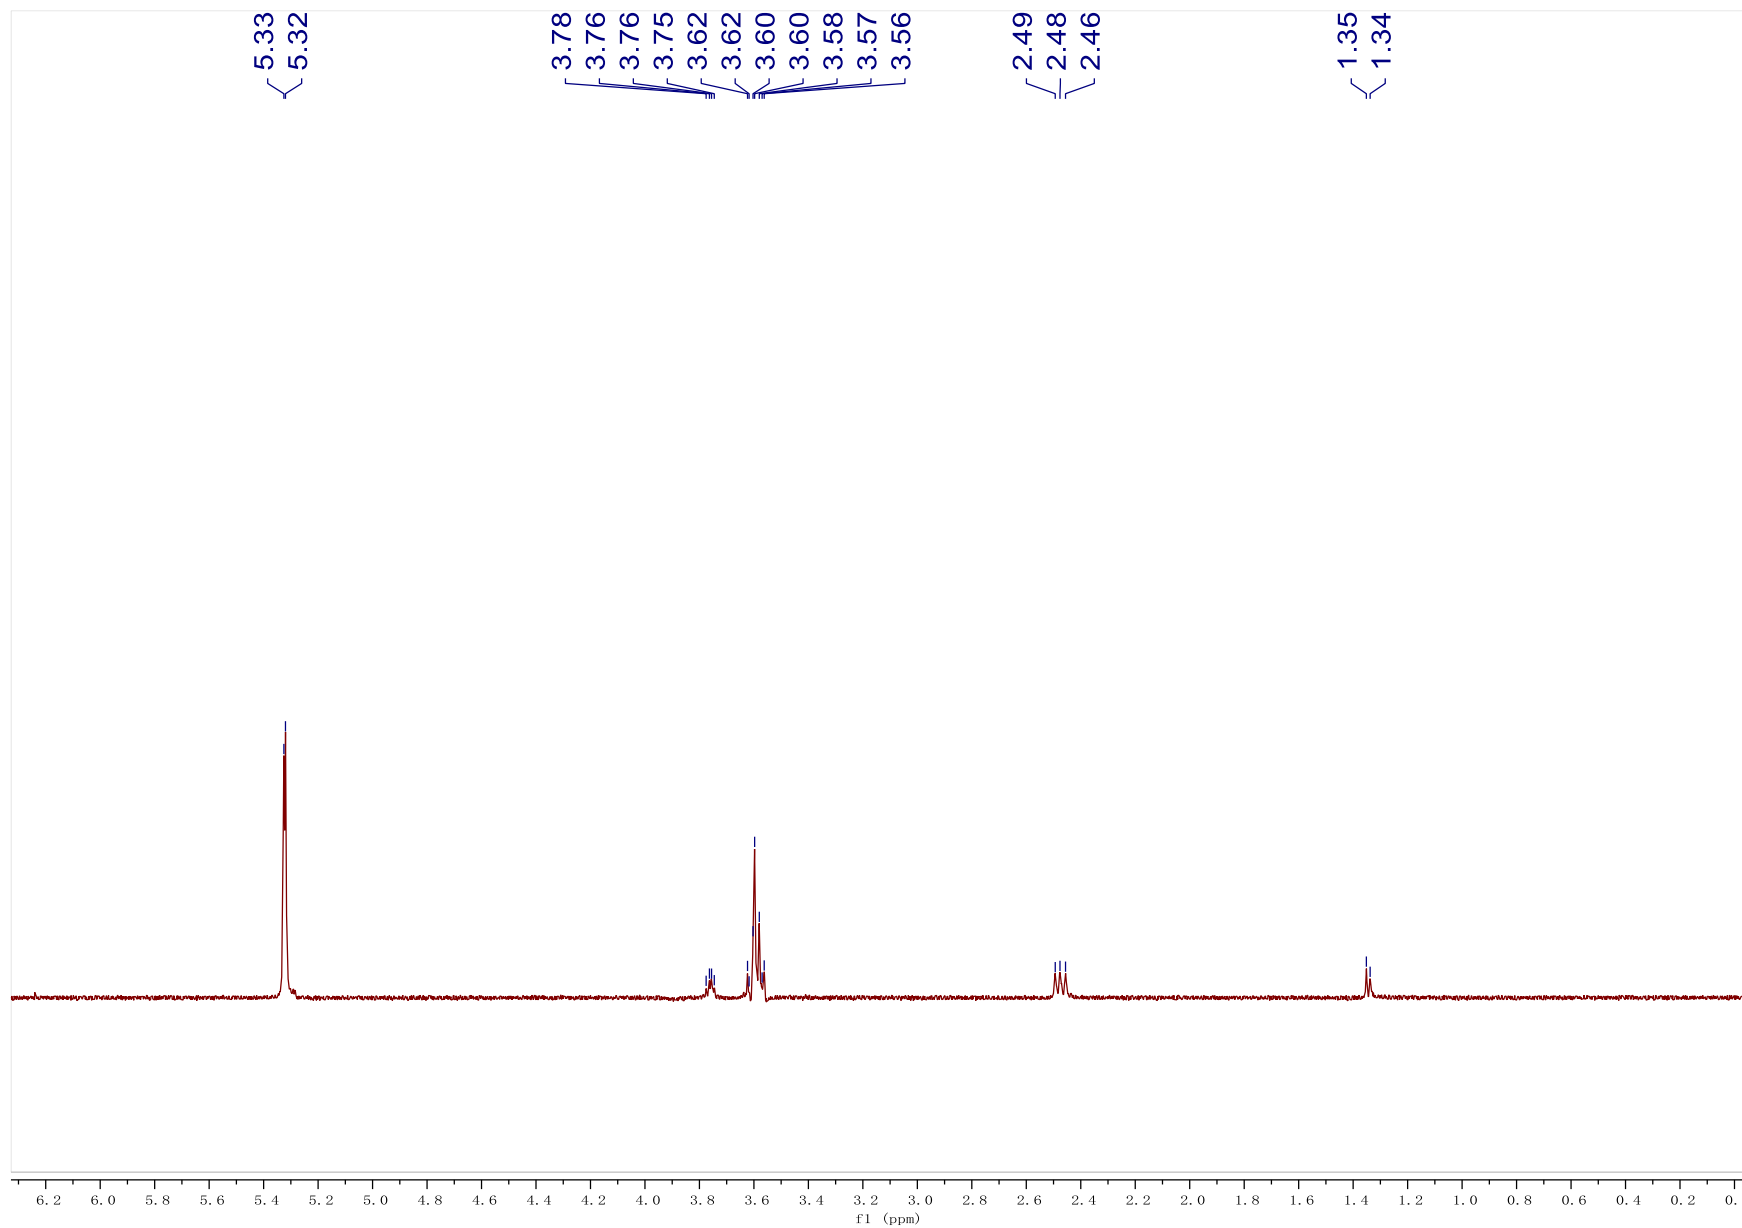

**Figure S37.** 1D-selective TOCSY spectrum of compound **11** (500 MHz, D<sub>2</sub>O, excitation at  $\delta$  5.32, H-G1).

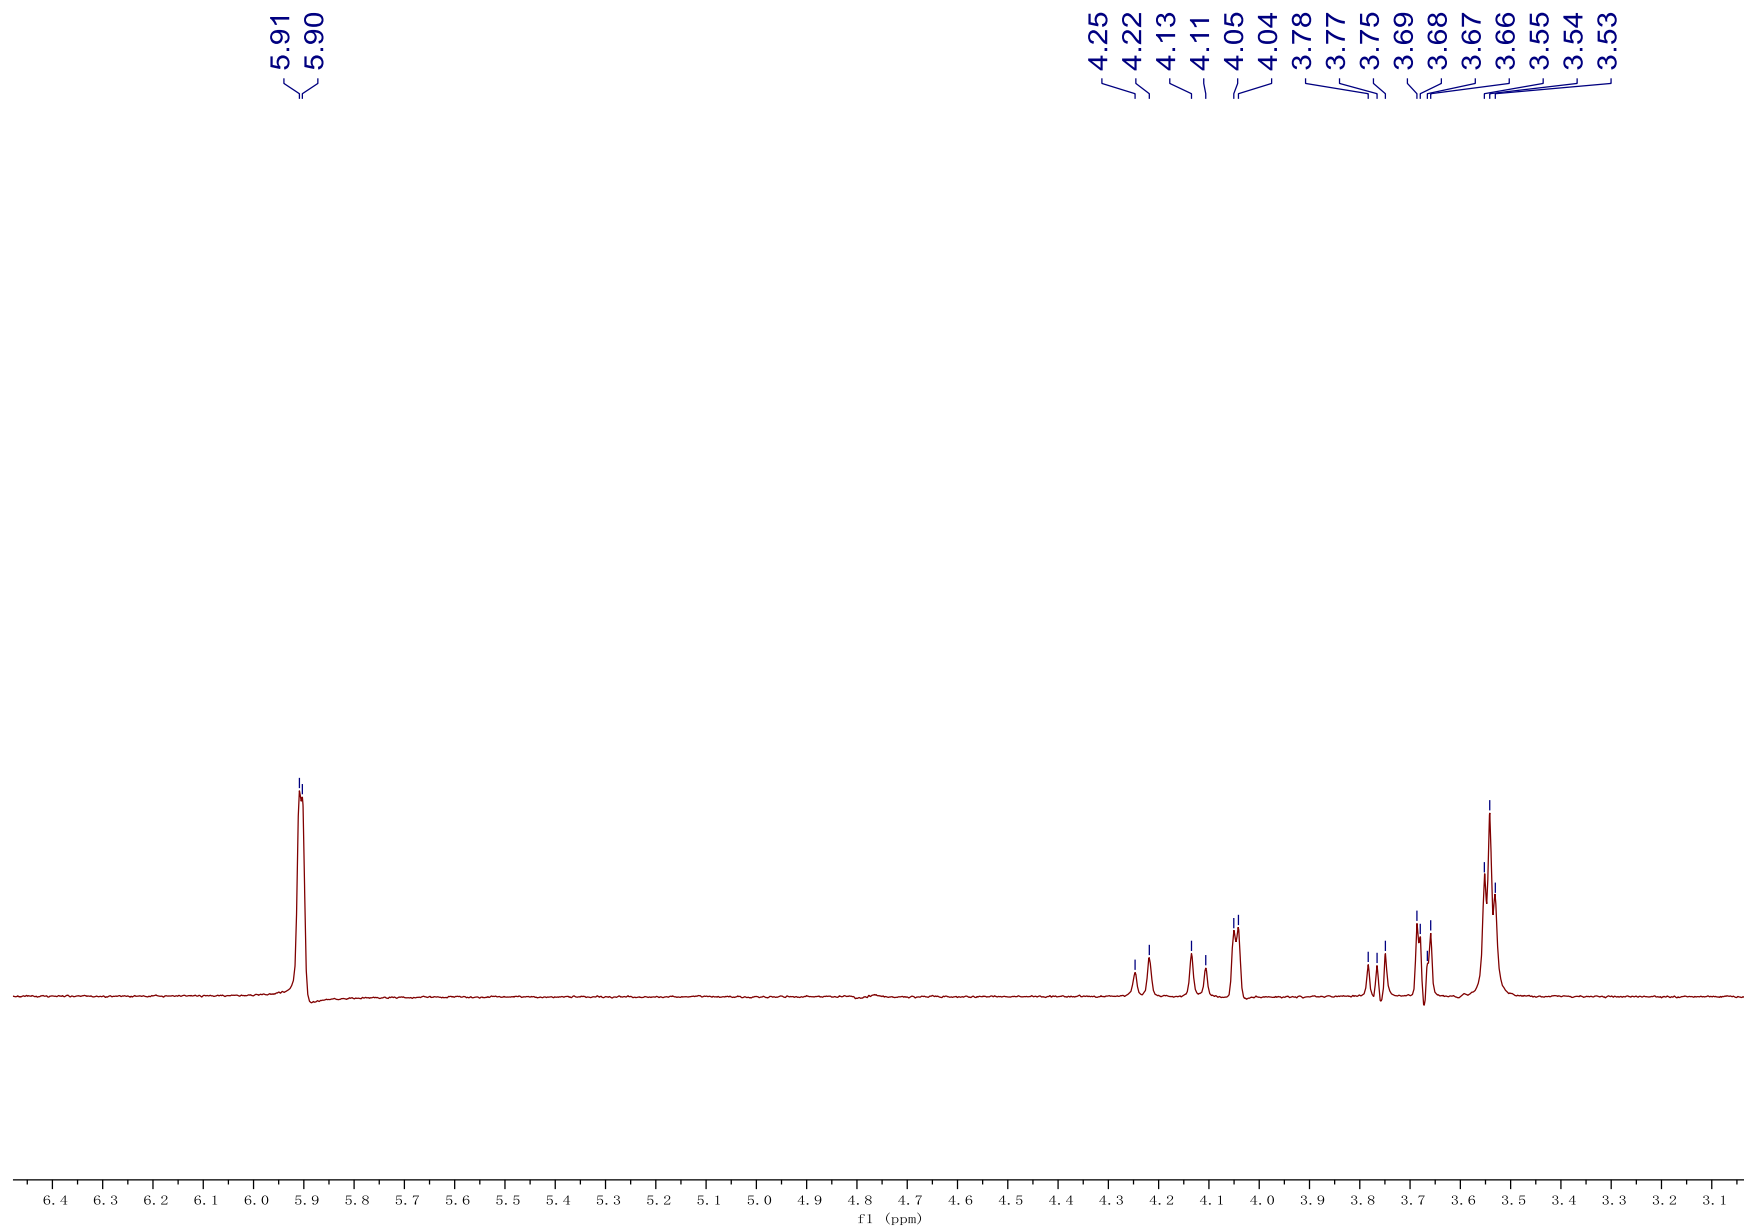

**Figure S38.** 1D-selective TOCSY spectrum of compound **11** (500 MHz, D<sub>2</sub>O, excitation at  $\delta$  5.90, H-**H7**).

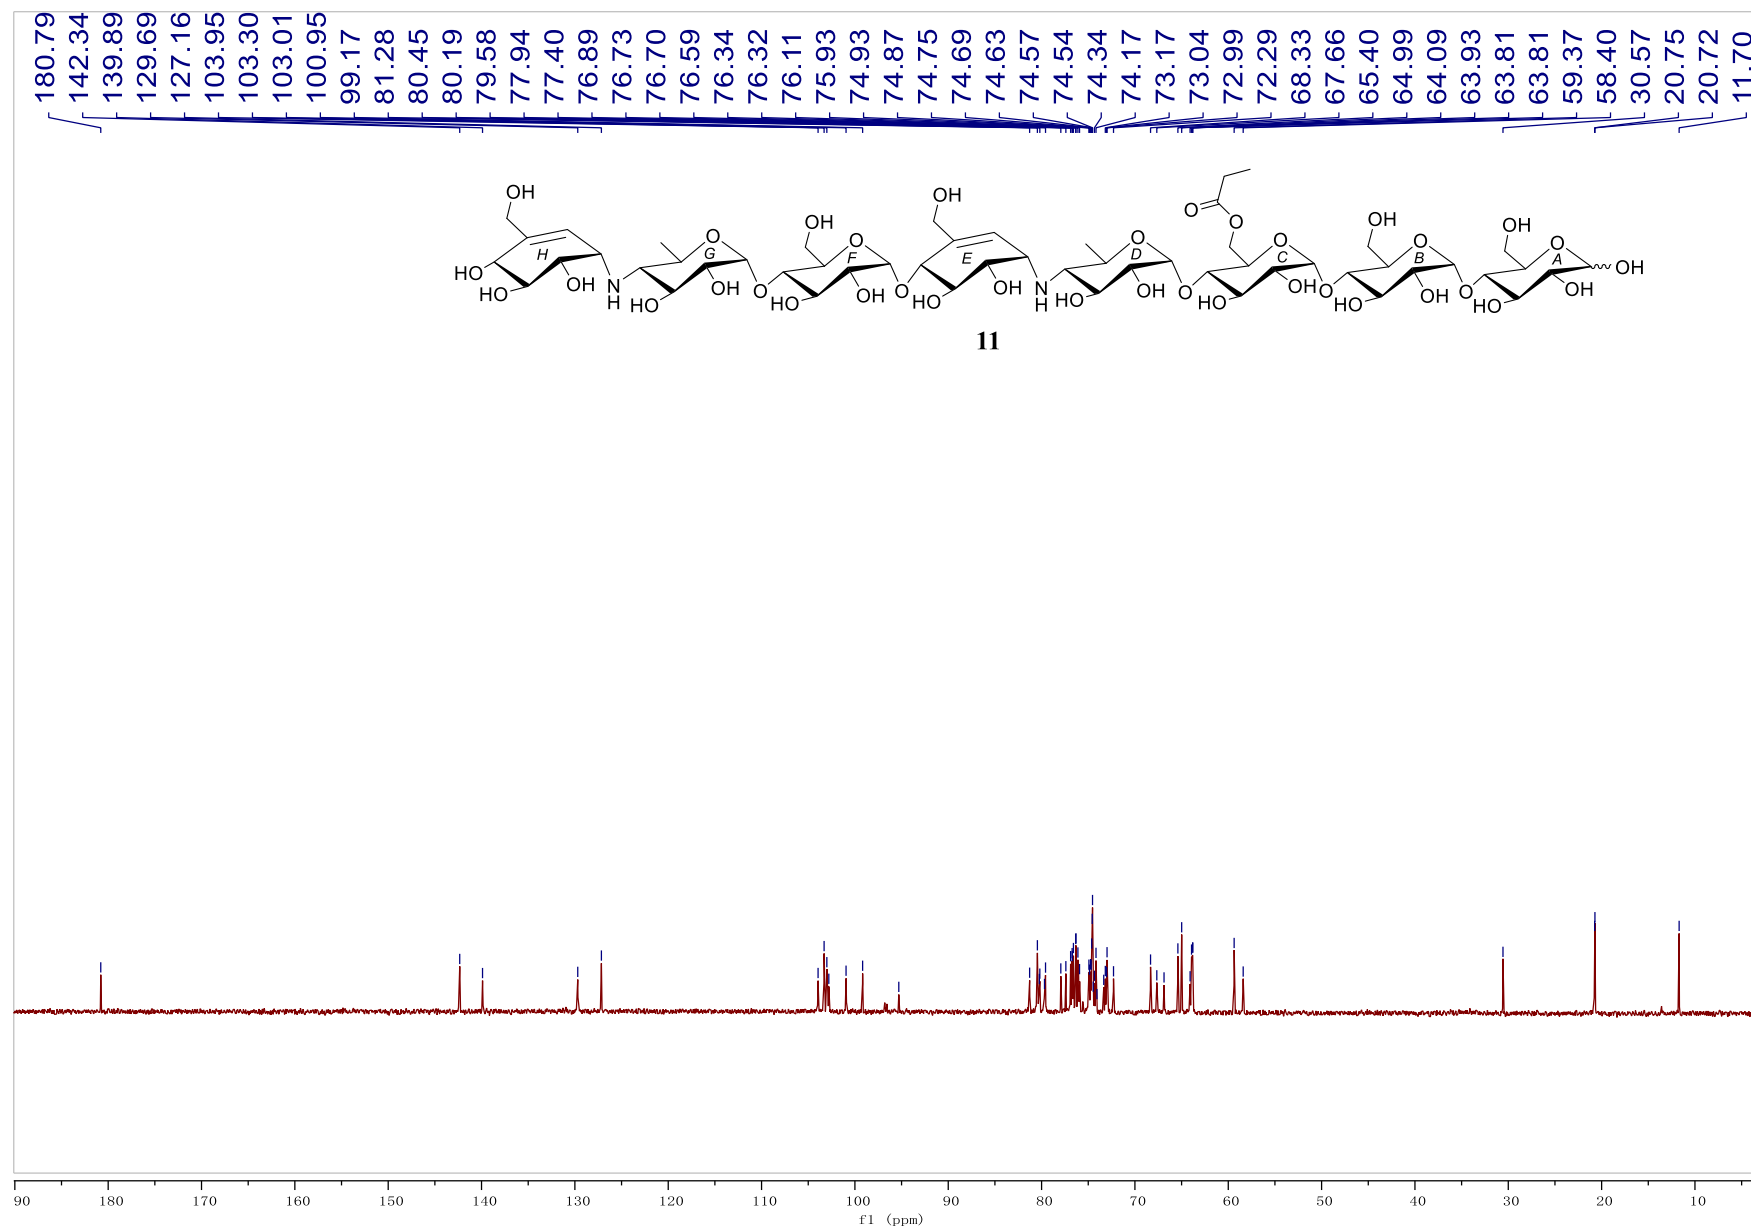

**Figure S39.**  $^{13}\text{C}$  NMR spectrum of compound **11** (125 MHz,  $\text{D}_2\text{O}$ ).

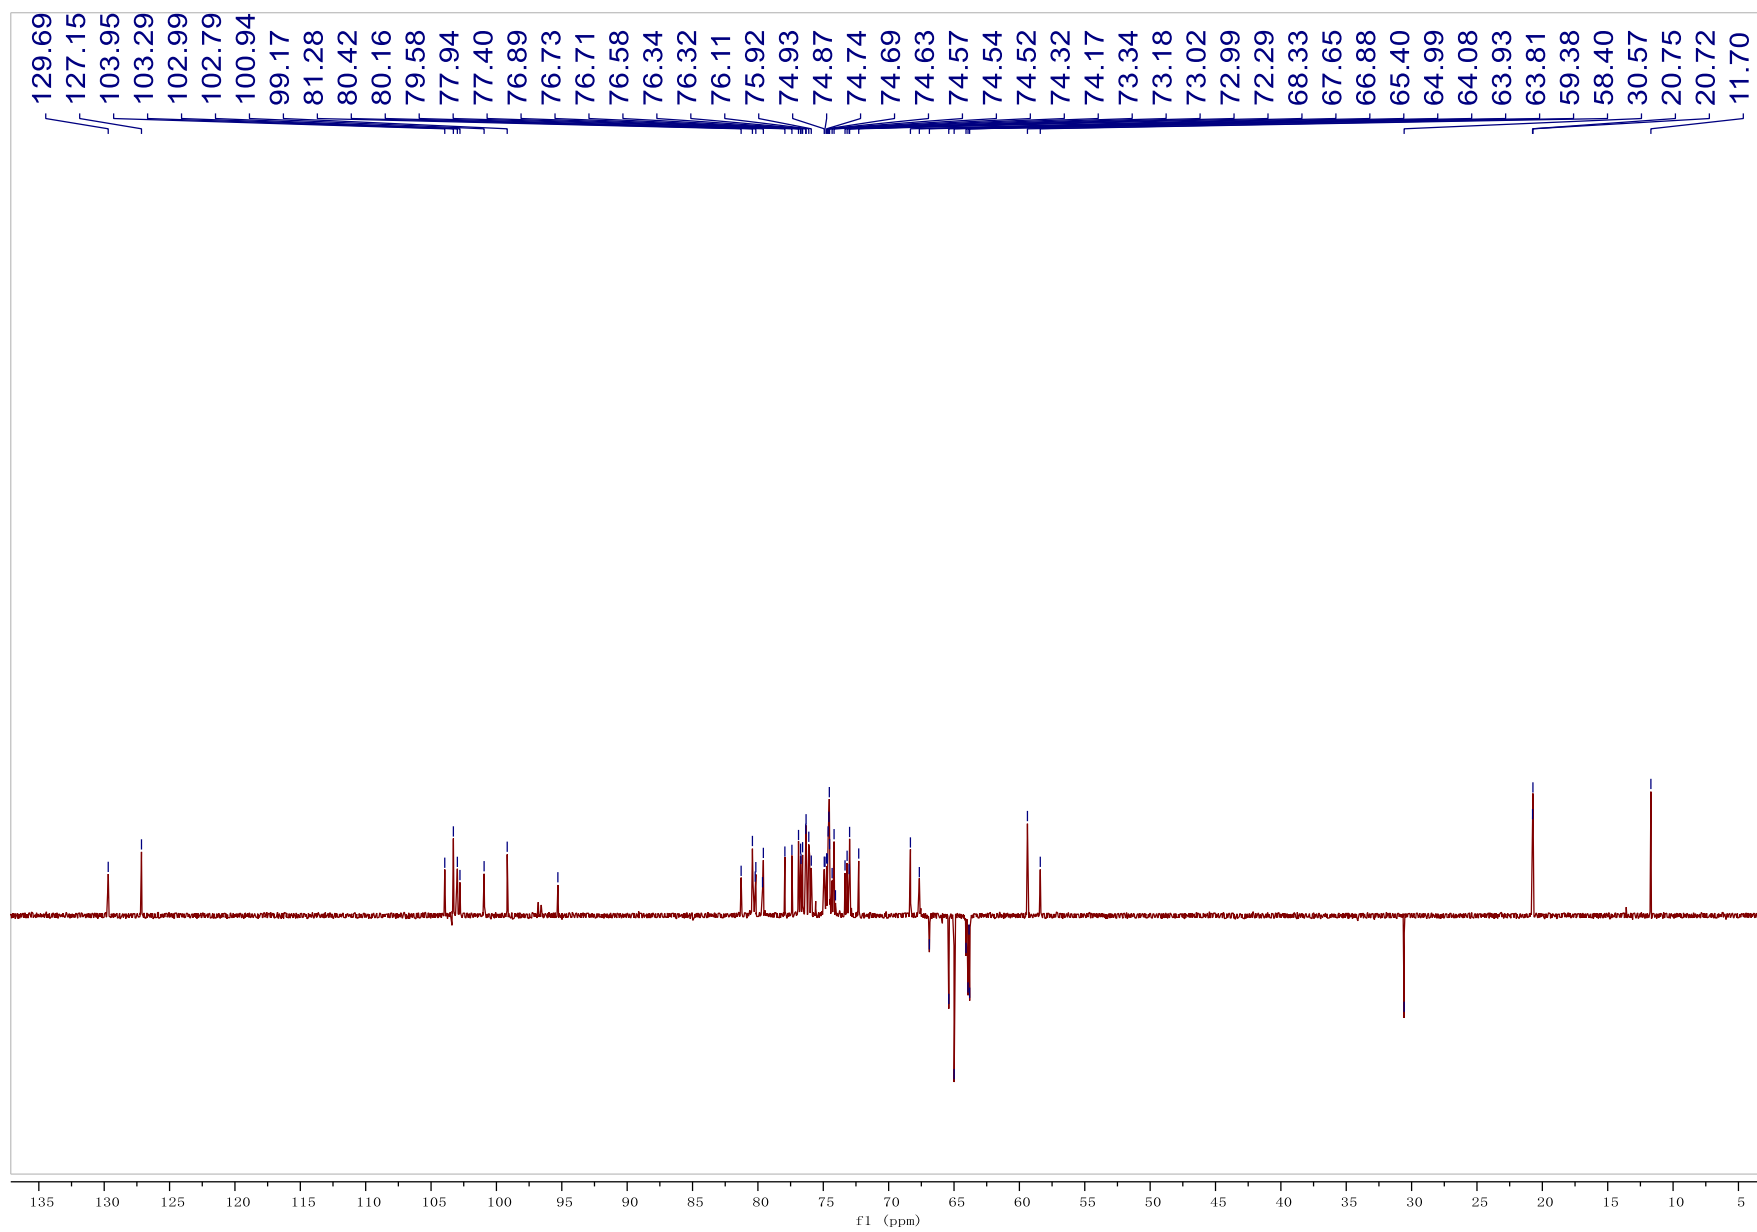

**Figure S40.** DEPT-135 spectrum of compound **11** (125 MHz, D<sub>2</sub>O).



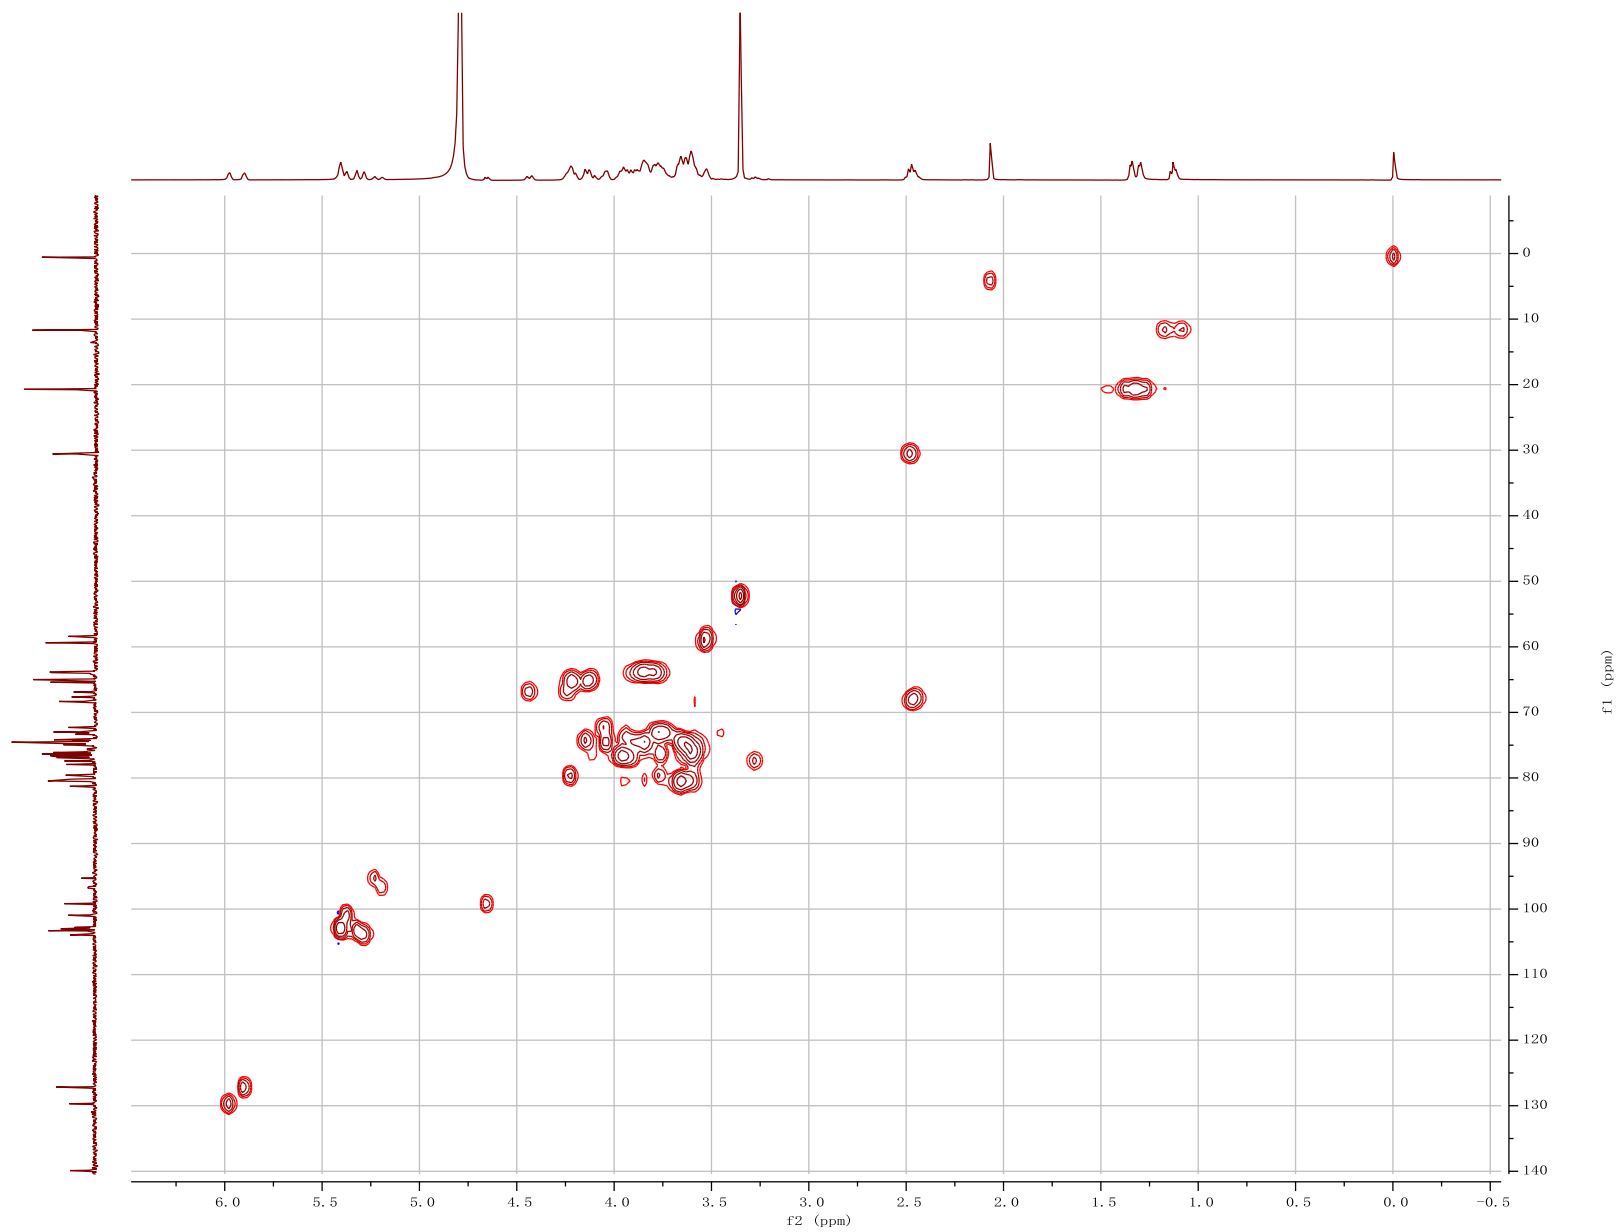

**Figure S41.** HSQC spectrum of compound **11** (500 MHz, D<sub>2</sub>O).

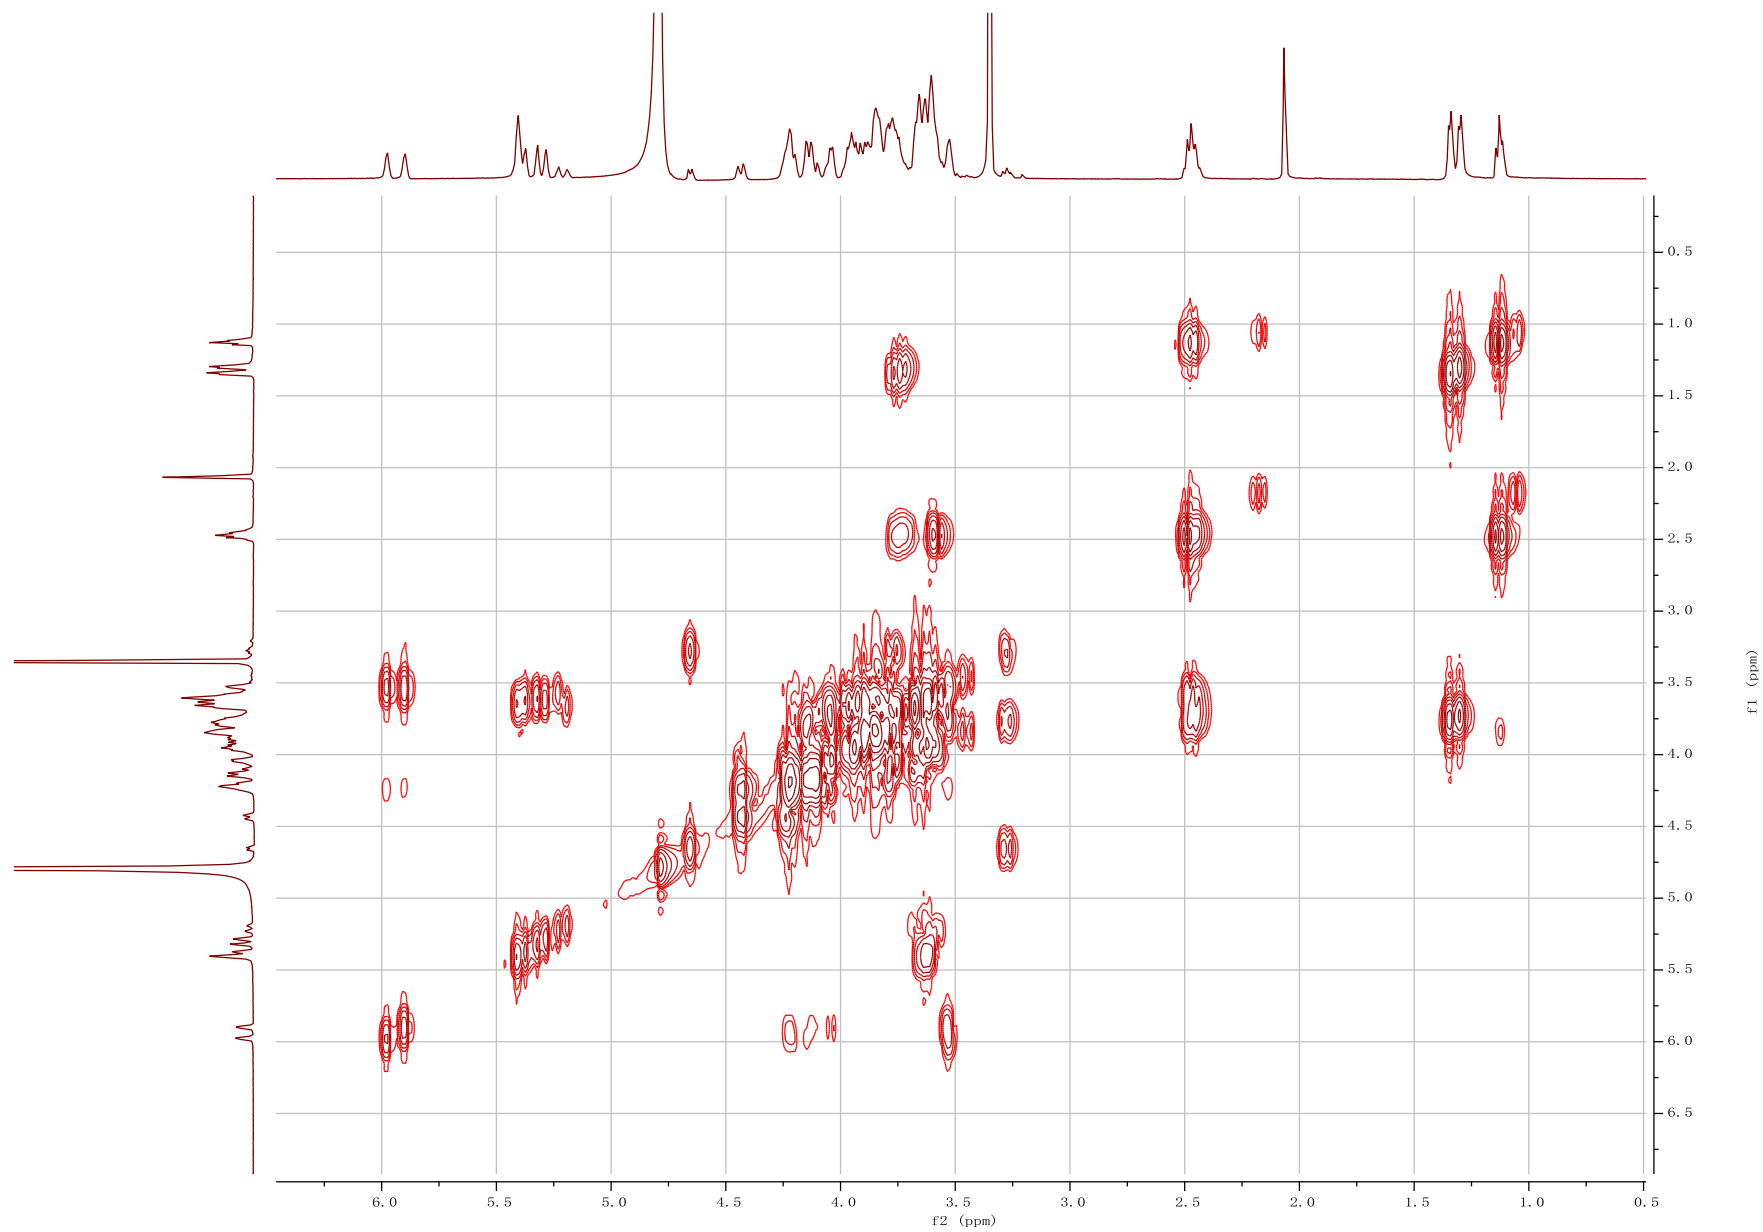

**Figure S42.**  $^1\text{H}$ - $^1\text{H}$  COSY spectrum of compound **11** (500 MHz,  $\text{D}_2\text{O}$ ).

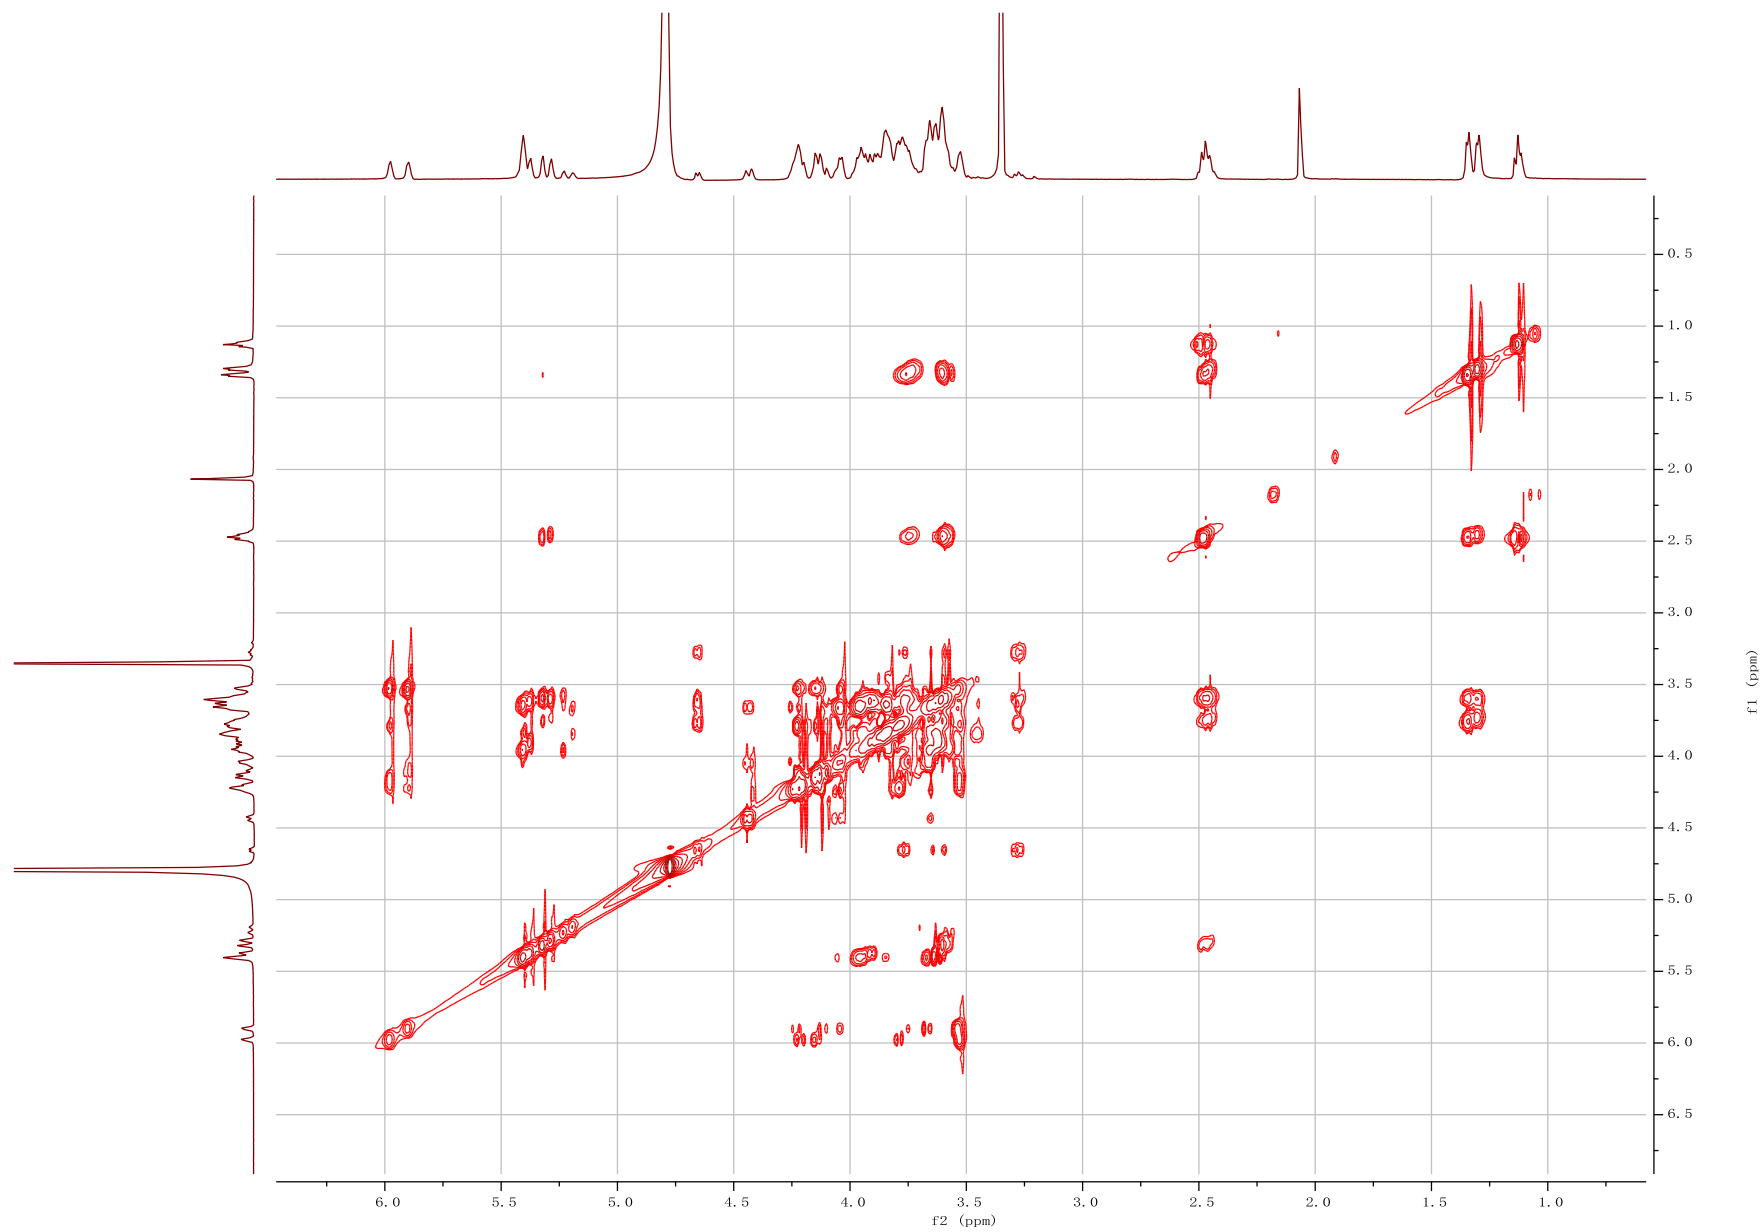

**Figure S43.** 2D-TOCSY spectrum of compound **11** (500 MHz, D<sub>2</sub>O).

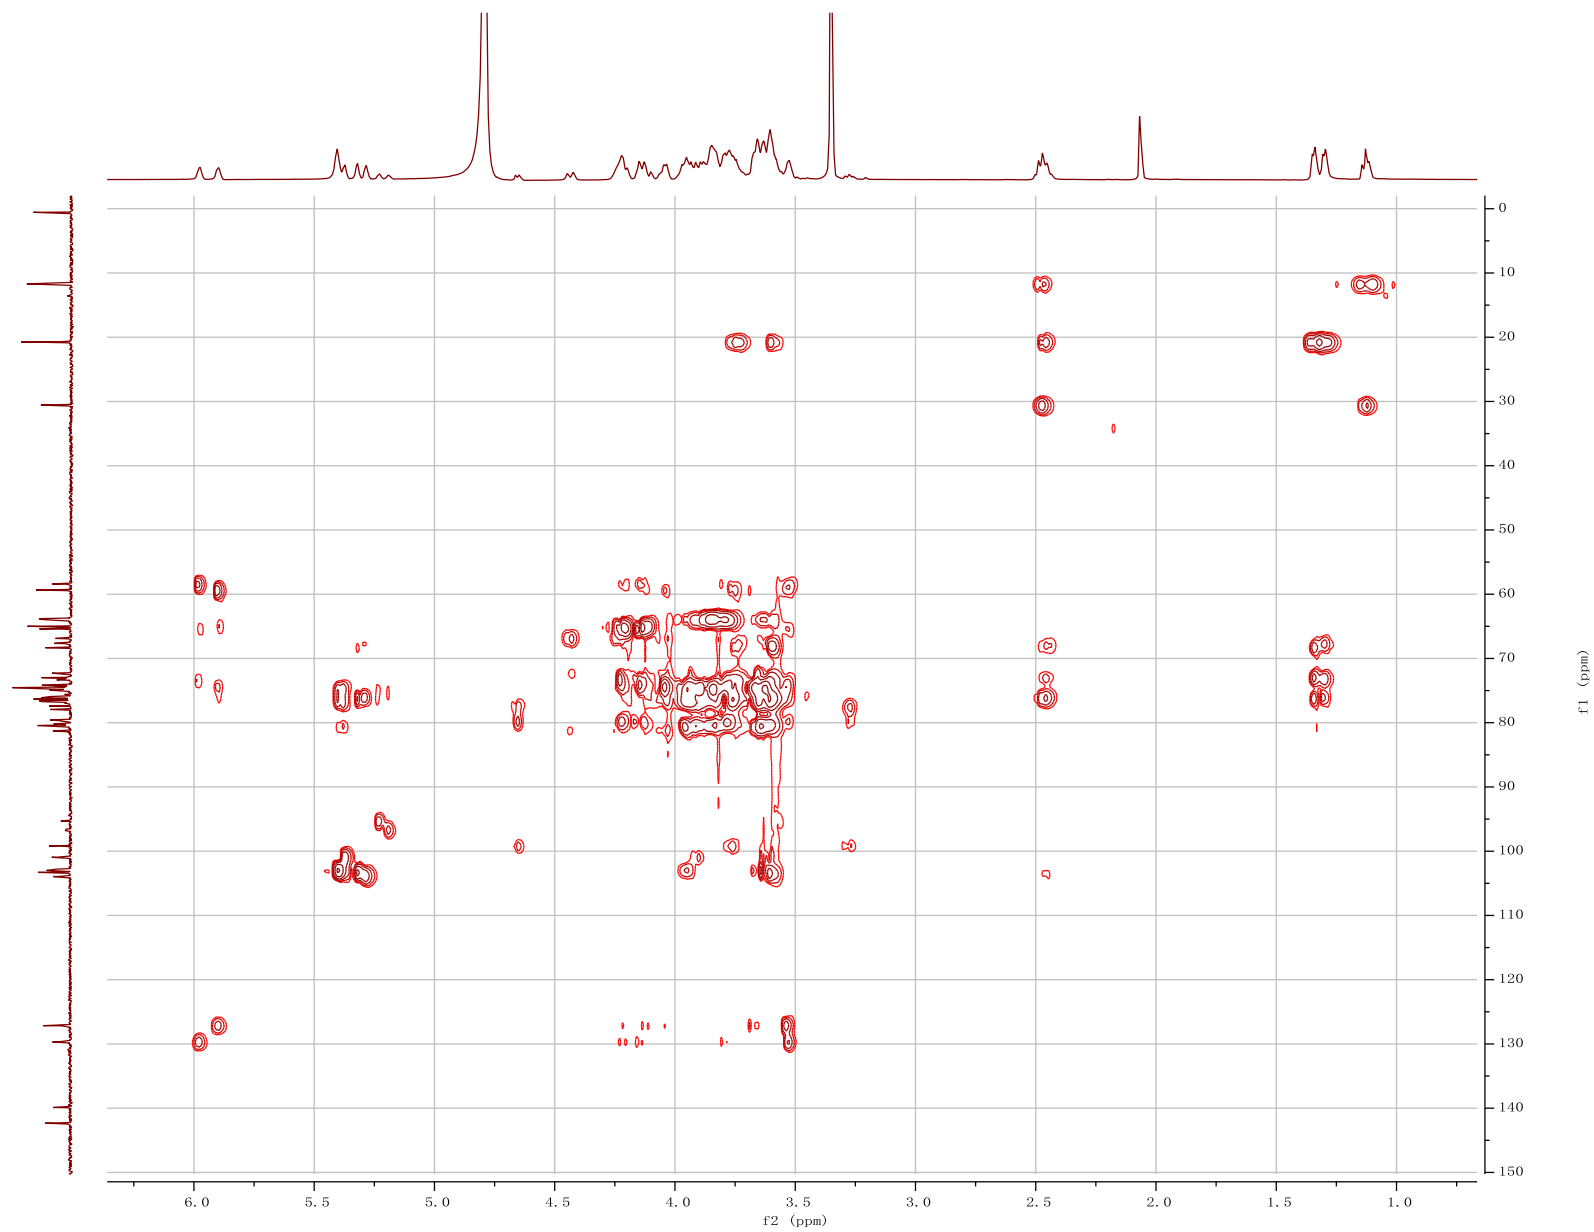

**Figure S44.** HSQC-TOCSY spectrum of compound **11** (500 MHz, D<sub>2</sub>O).

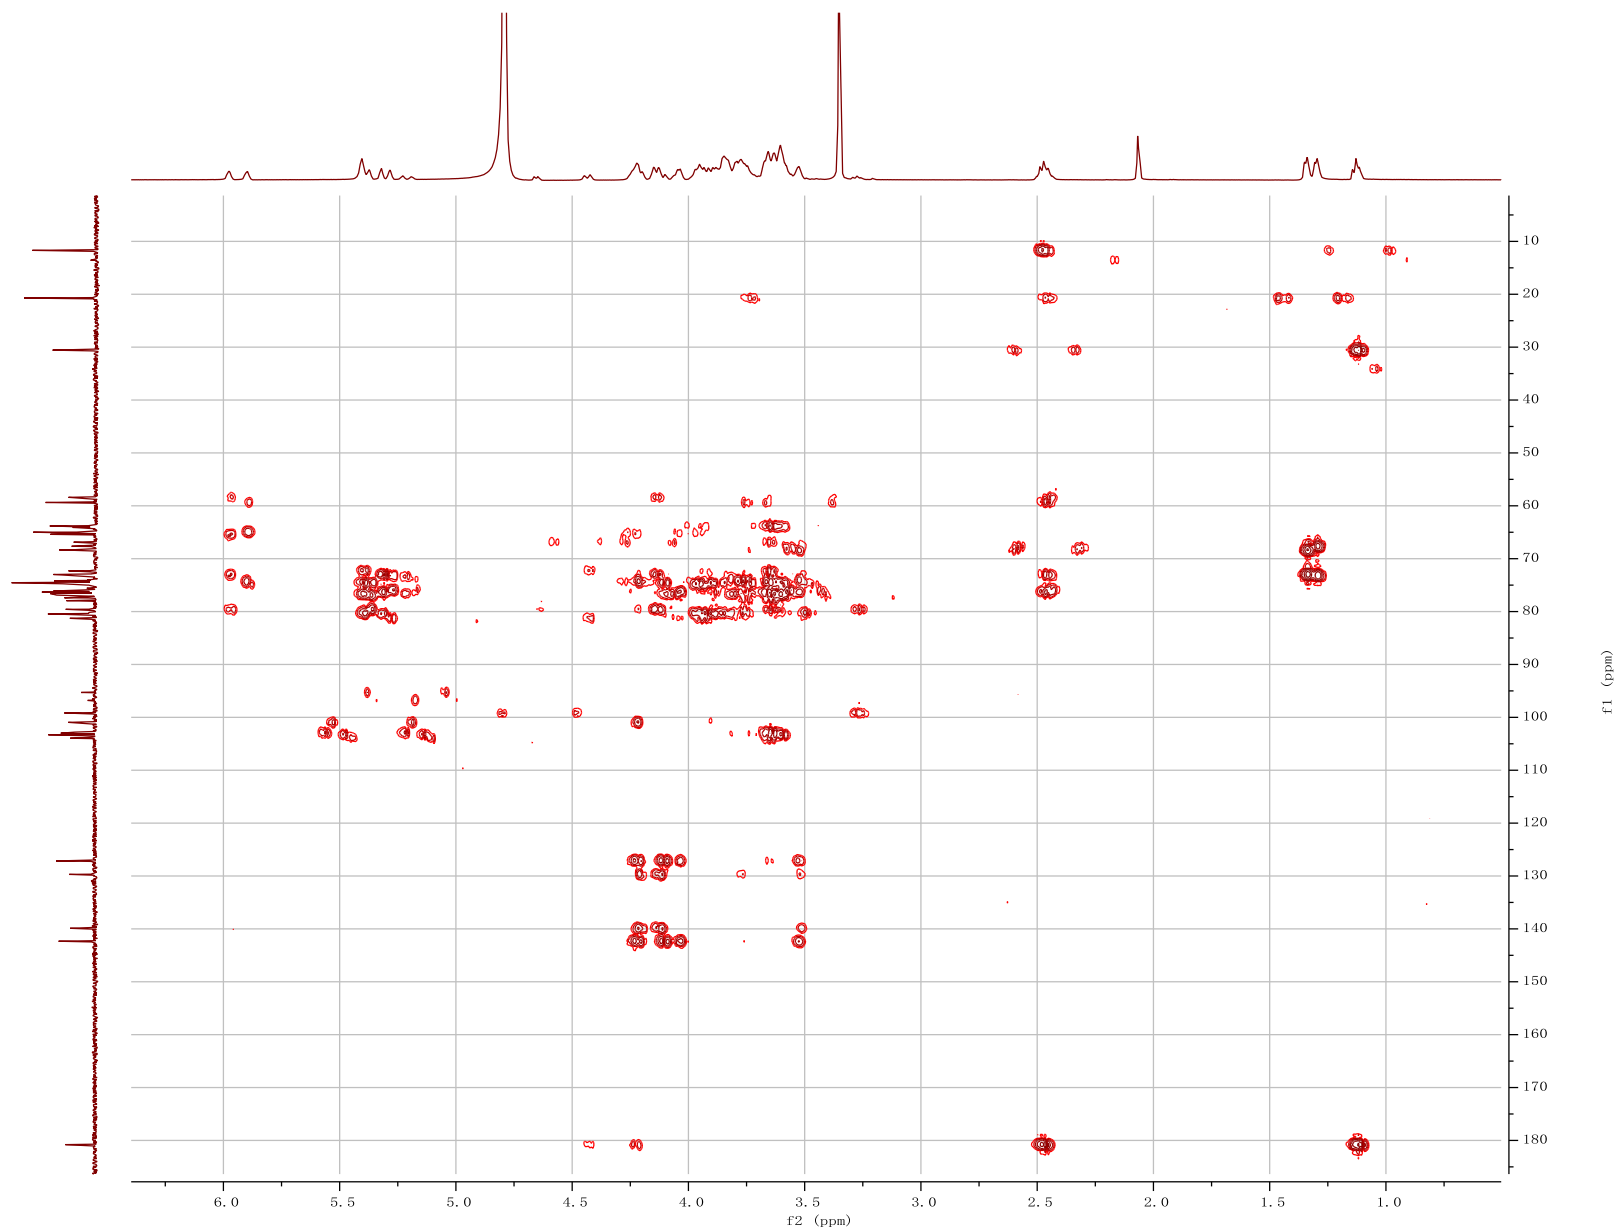

**Figure S45.** HMBC spectrum of compound **11** (500 MHz, D<sub>2</sub>O).

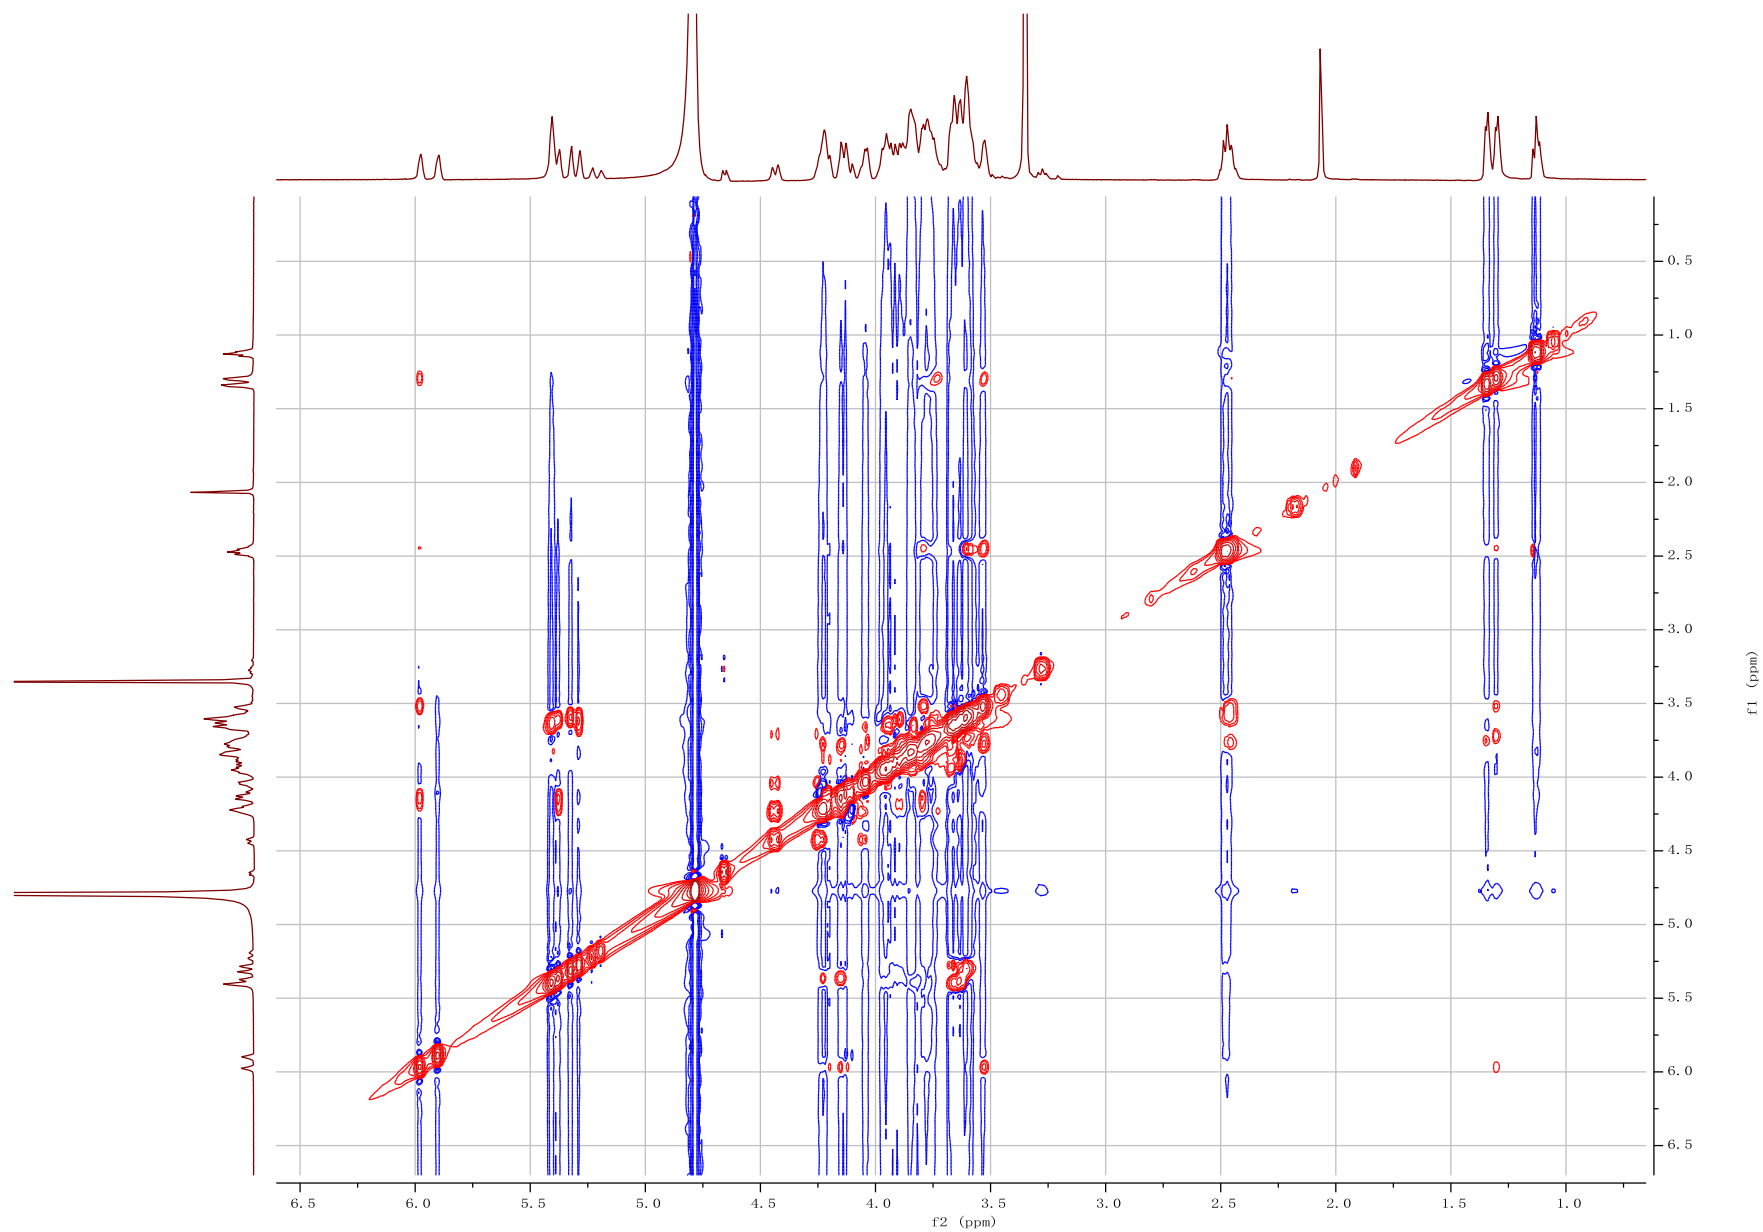

**Figure S46.** NOESY spectrum of compound **11** (500 MHz, D<sub>2</sub>O).

H\_77a #2908 RT: 9.86 AV: 1 NL: 4.02E5  
T: FTMS + p ESI d Full ms2 1411.0482@hcd25.

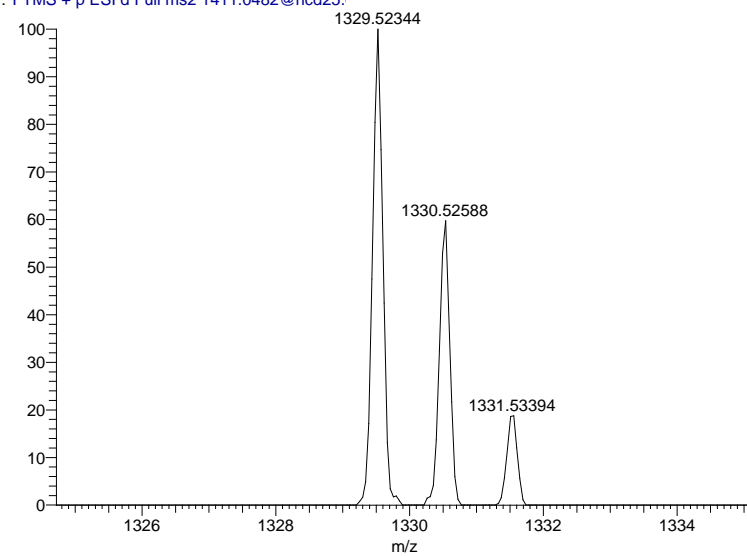

**Figure S47.** HRESIMS spectrum of compound **11**.

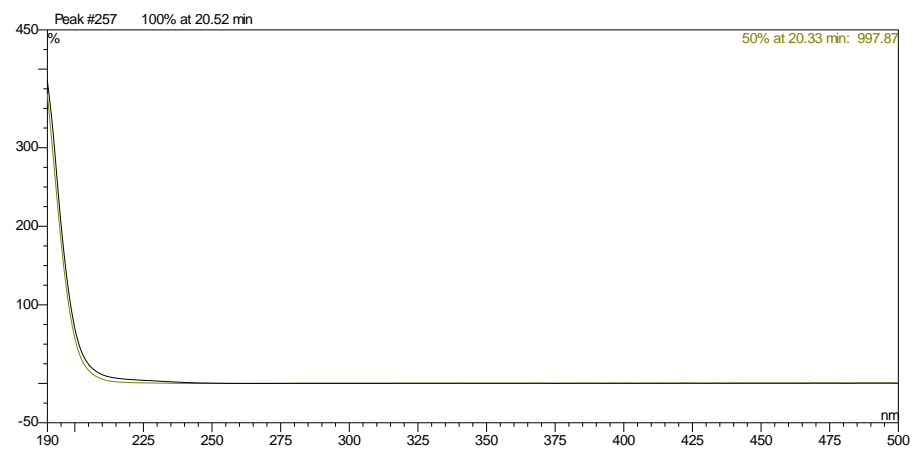

**Figure S48.** UV spectrum of compound **11**.

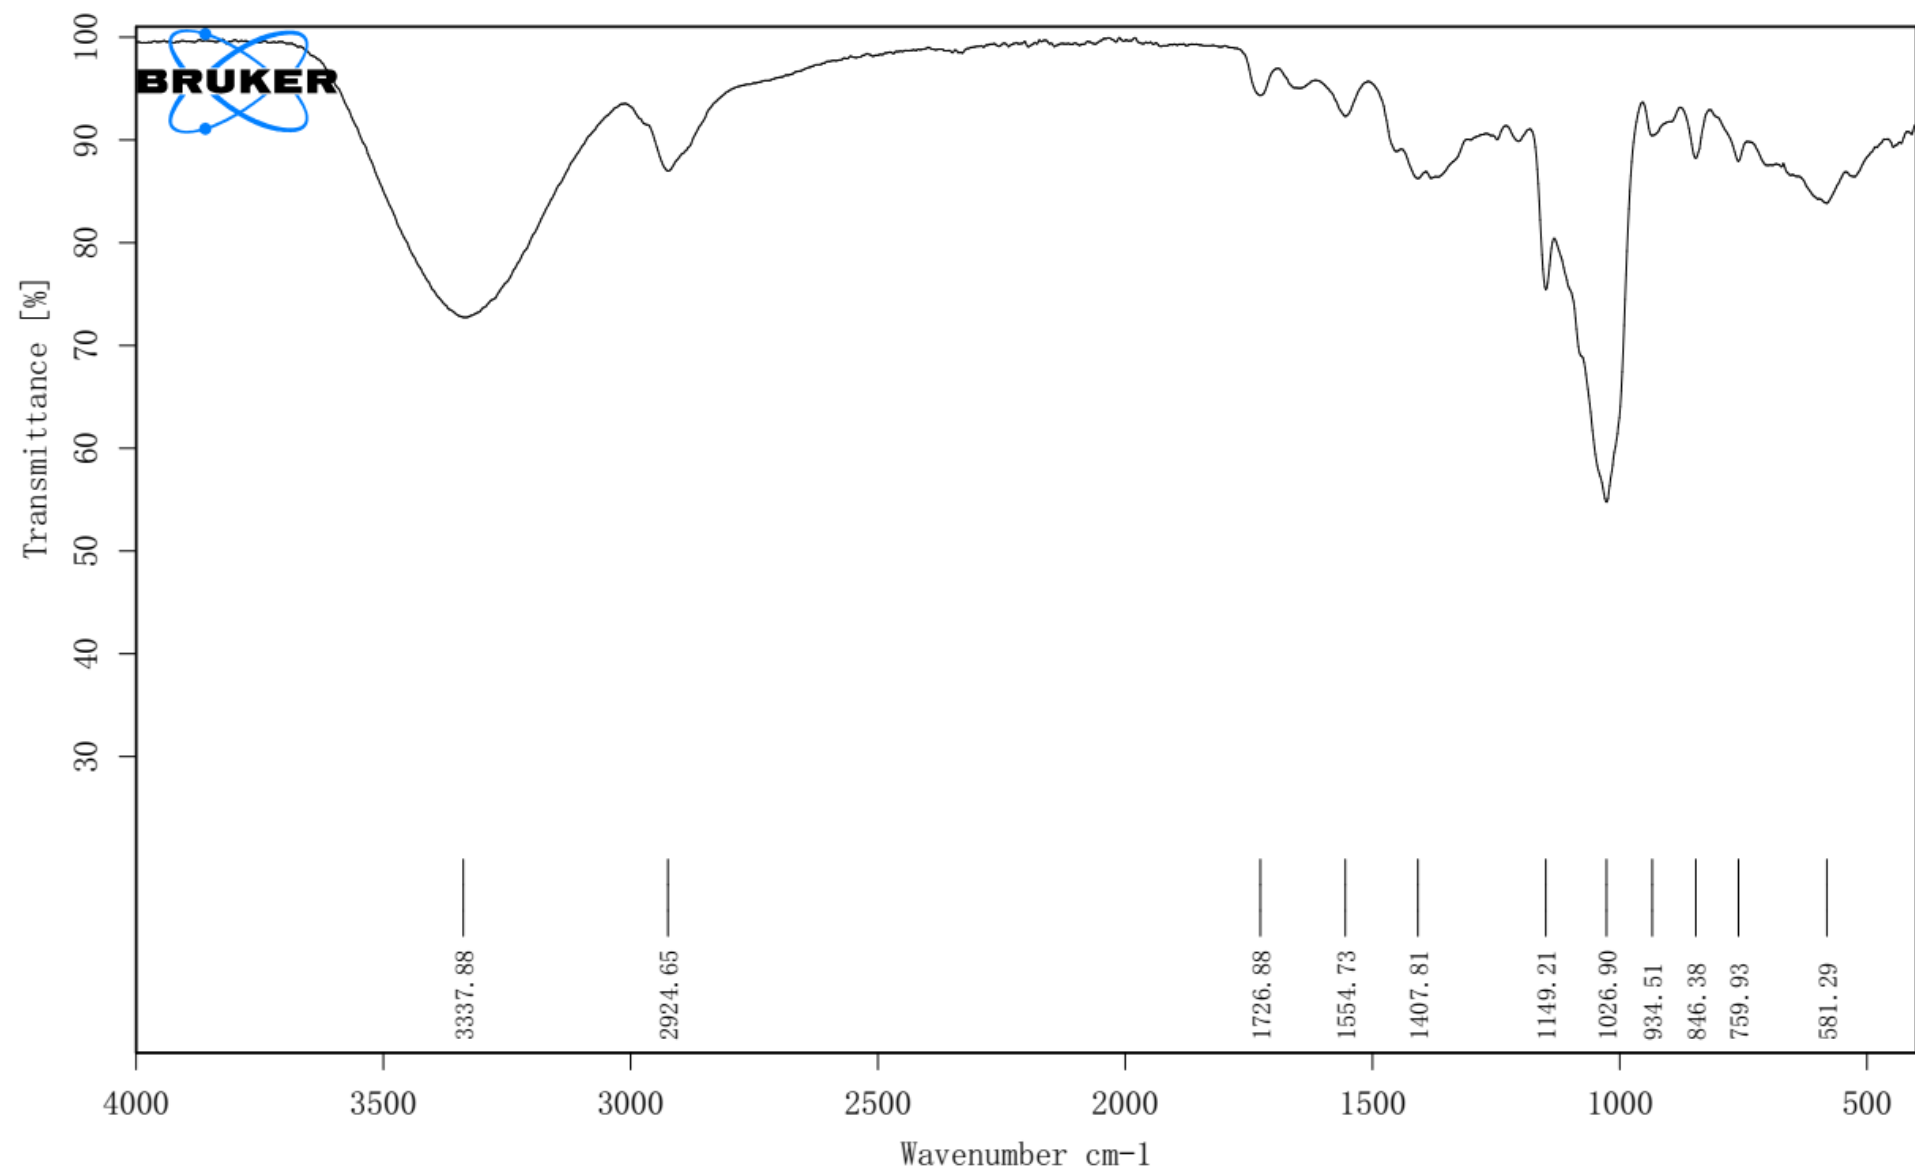

**Figure S49.** IR spectrum of compound **11**.



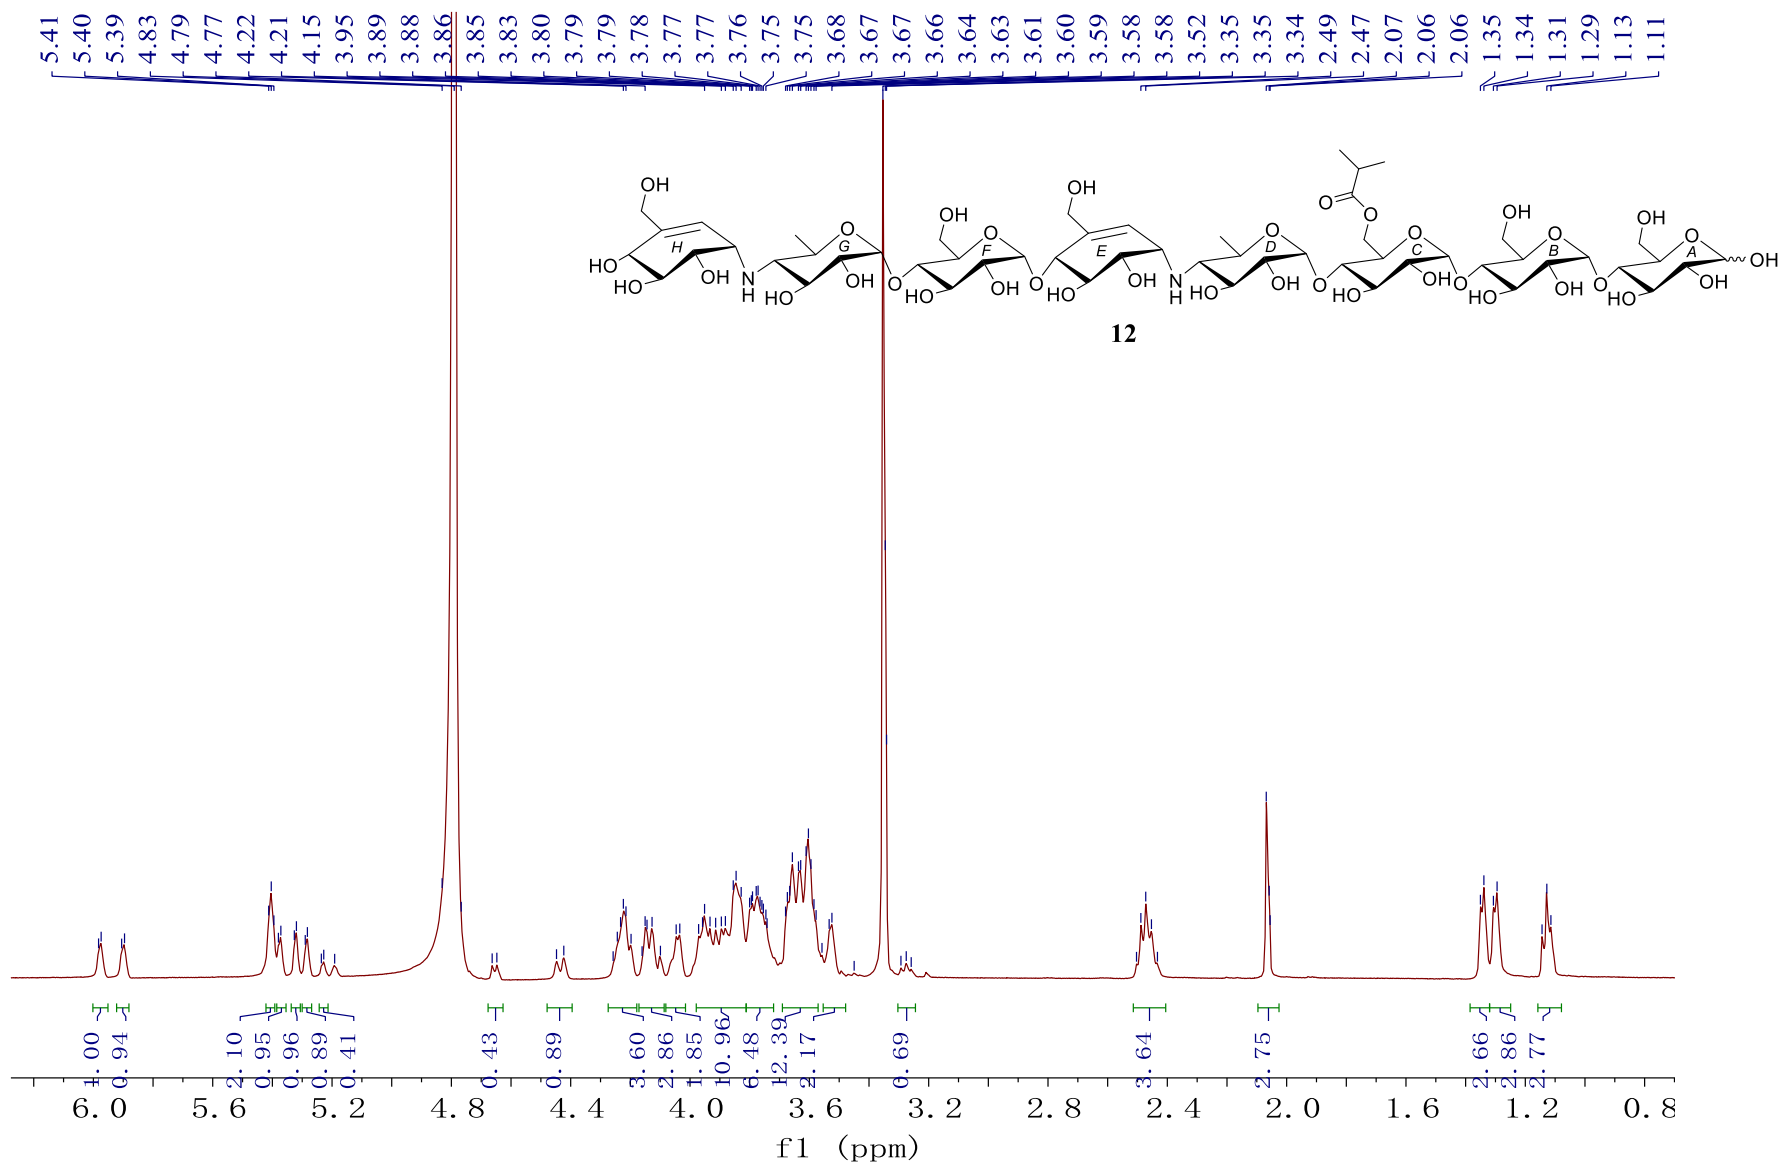

**Figure S50.**  $^1\text{H}$  NMR spectrum of compound **12** (500 MHz,  $\text{D}_2\text{O}$ ).

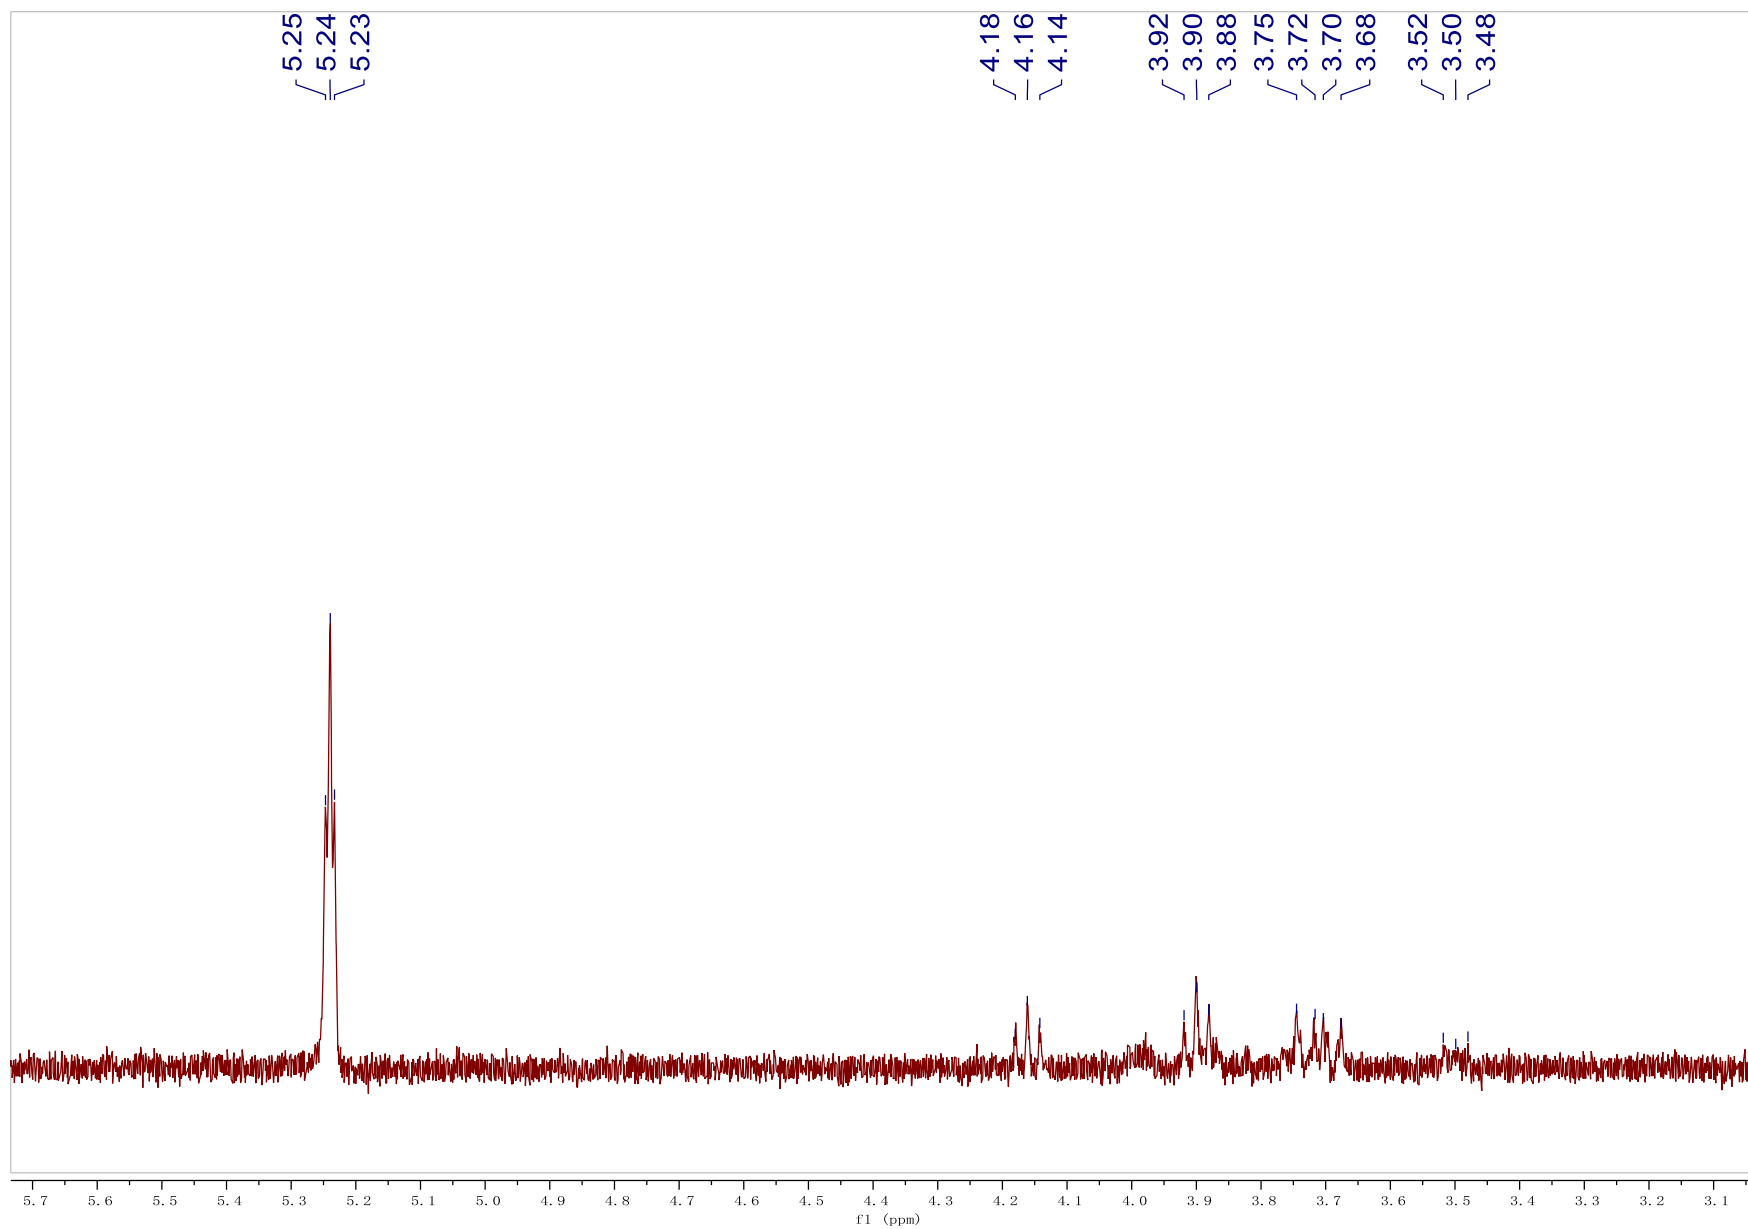

**Figure S51.** 1D-selective TOCSY spectrum of compound **12** (500 MHz, D<sub>2</sub>O, excitation at  $\delta$  5.24, H-A1 $\alpha$ ).

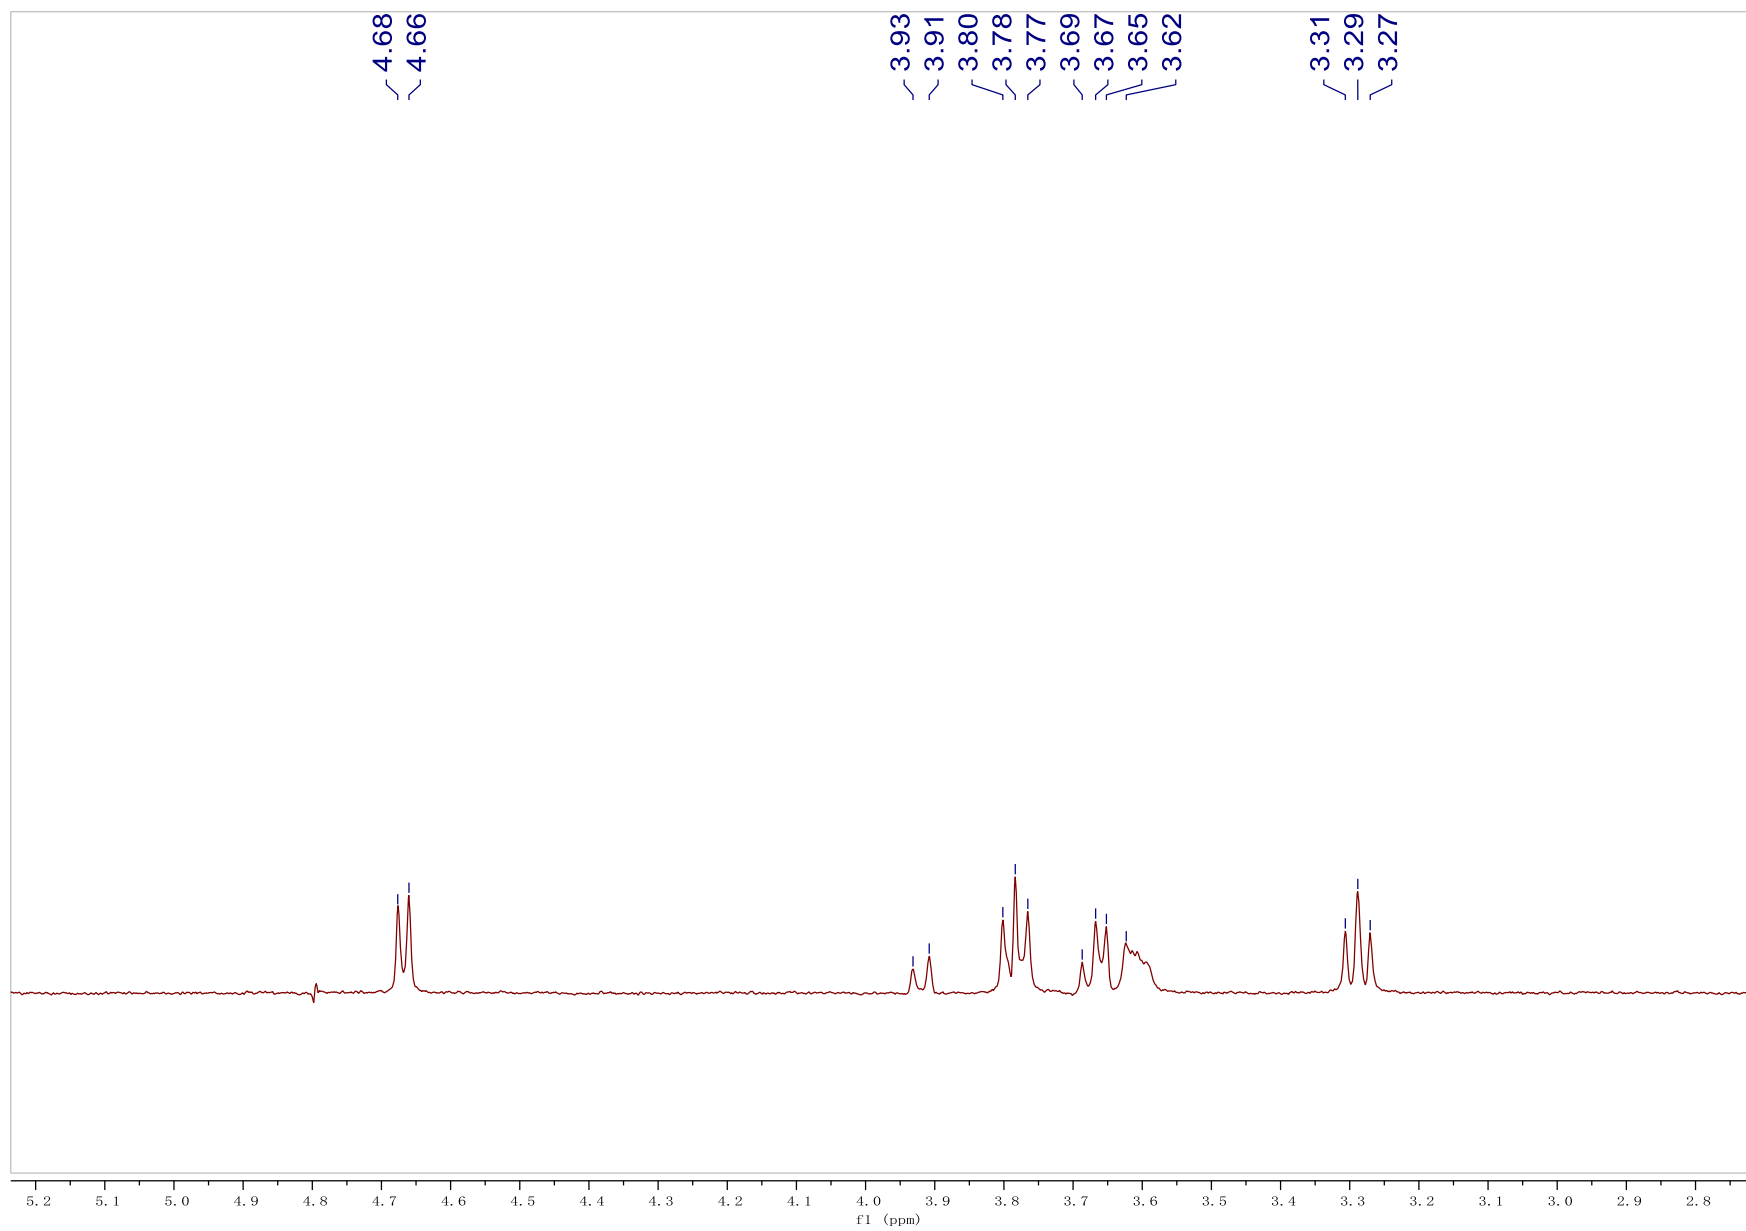

**Figure S52.** 1D-selective TOCSY spectrum of compound **12** (500 MHz, D<sub>2</sub>O, excitation at  $\delta$  4.66, H-A1 $\beta$ ).

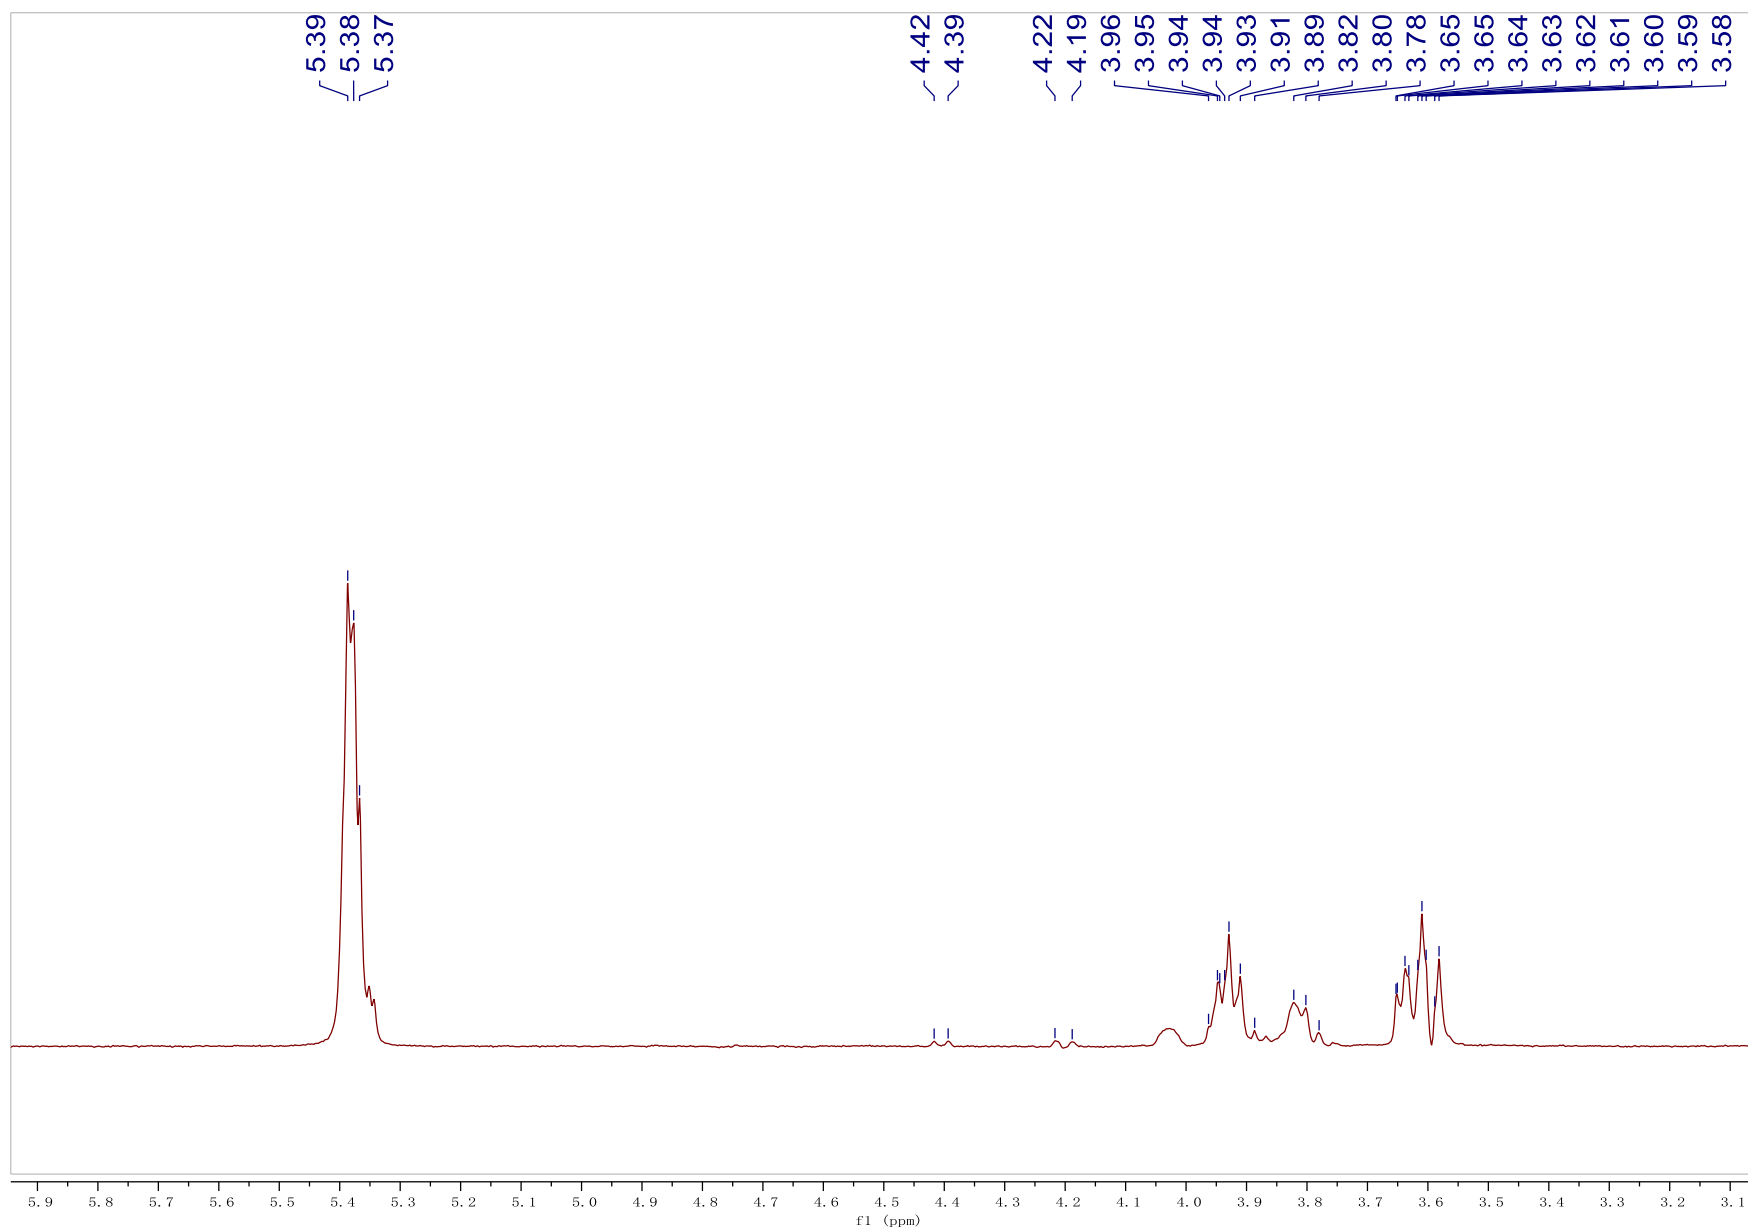

**Figure S53.** 1D-selective TOCSY spectrum of compound **12** (500 MHz, D<sub>2</sub>O, excitation at  $\delta$  5.38, H-**B1** and H-**C1**).

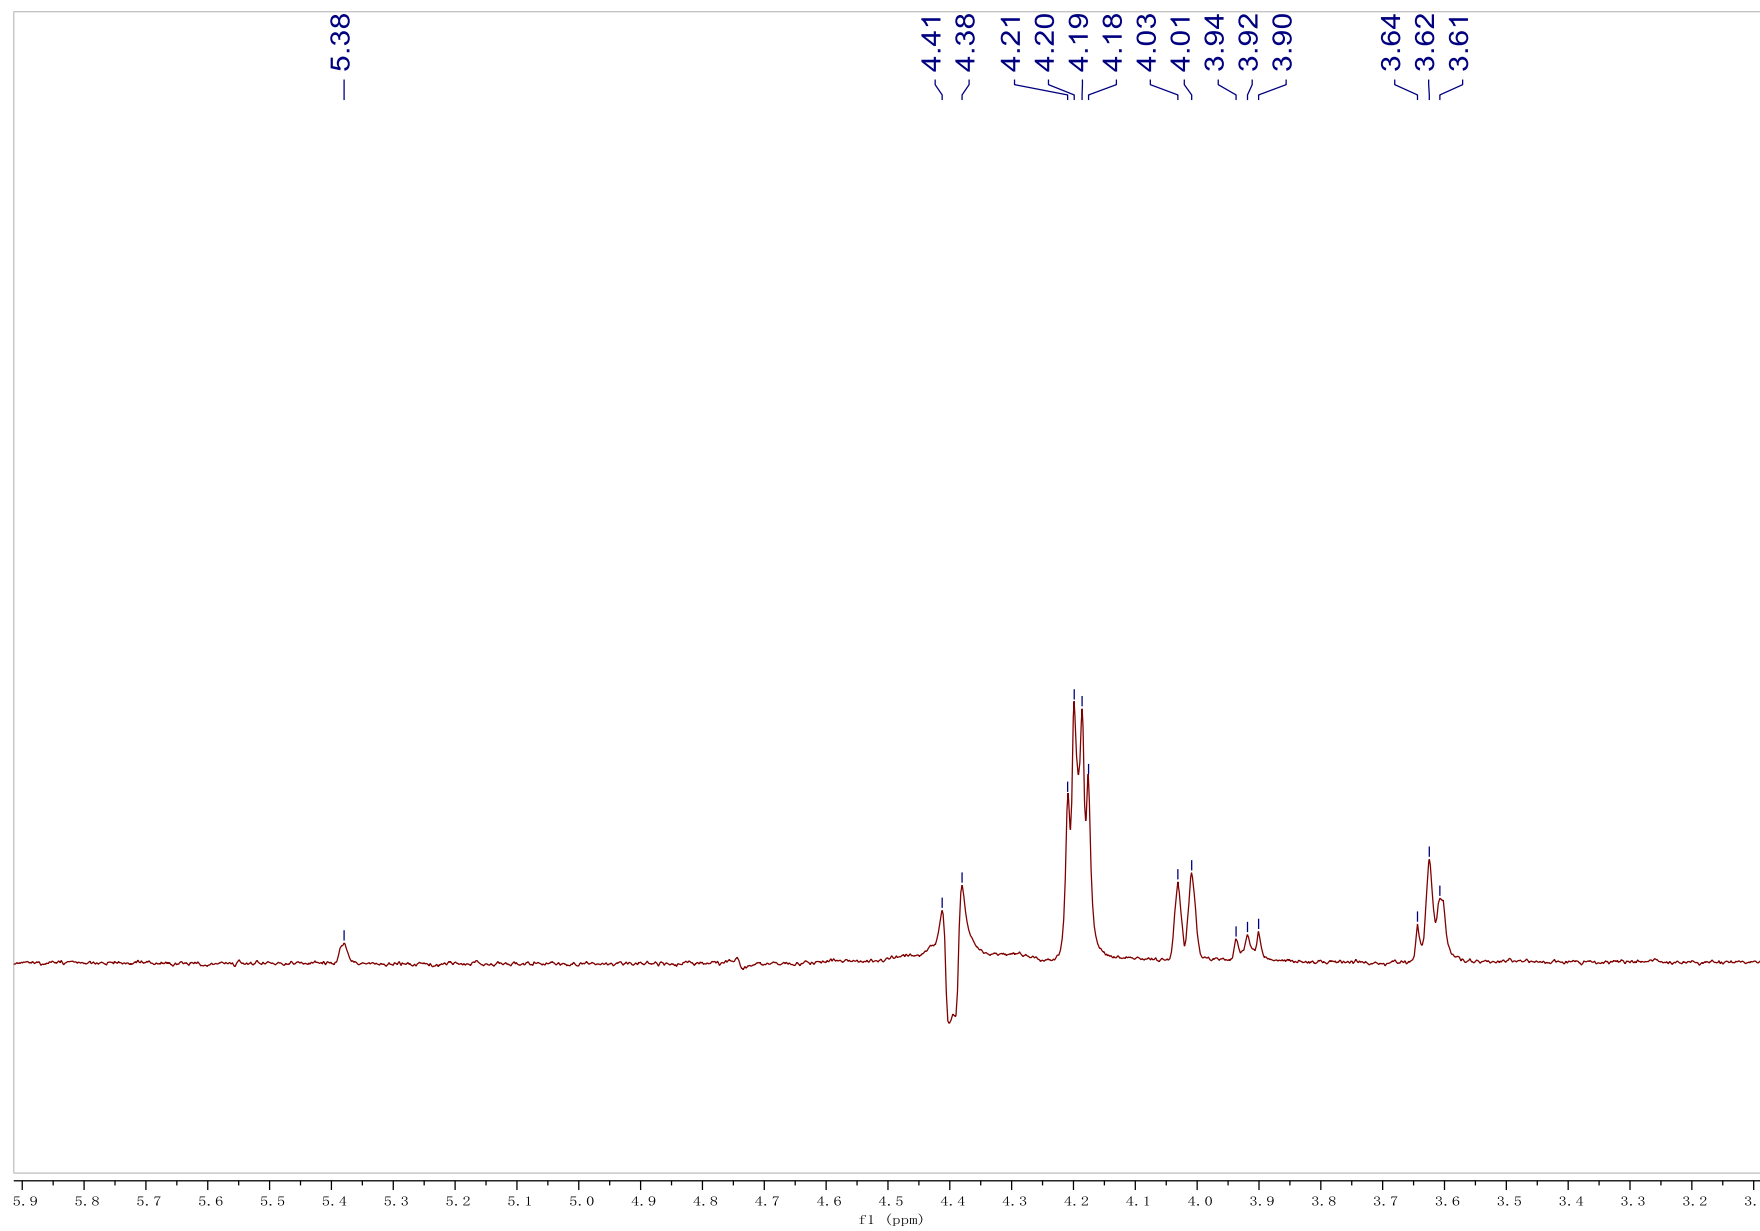

**Figure S54.** 1D-selective TOCSY spectrum of compound **12** (500 MHz, D<sub>2</sub>O, excitation at  $\delta$  4.44, H-C6a).

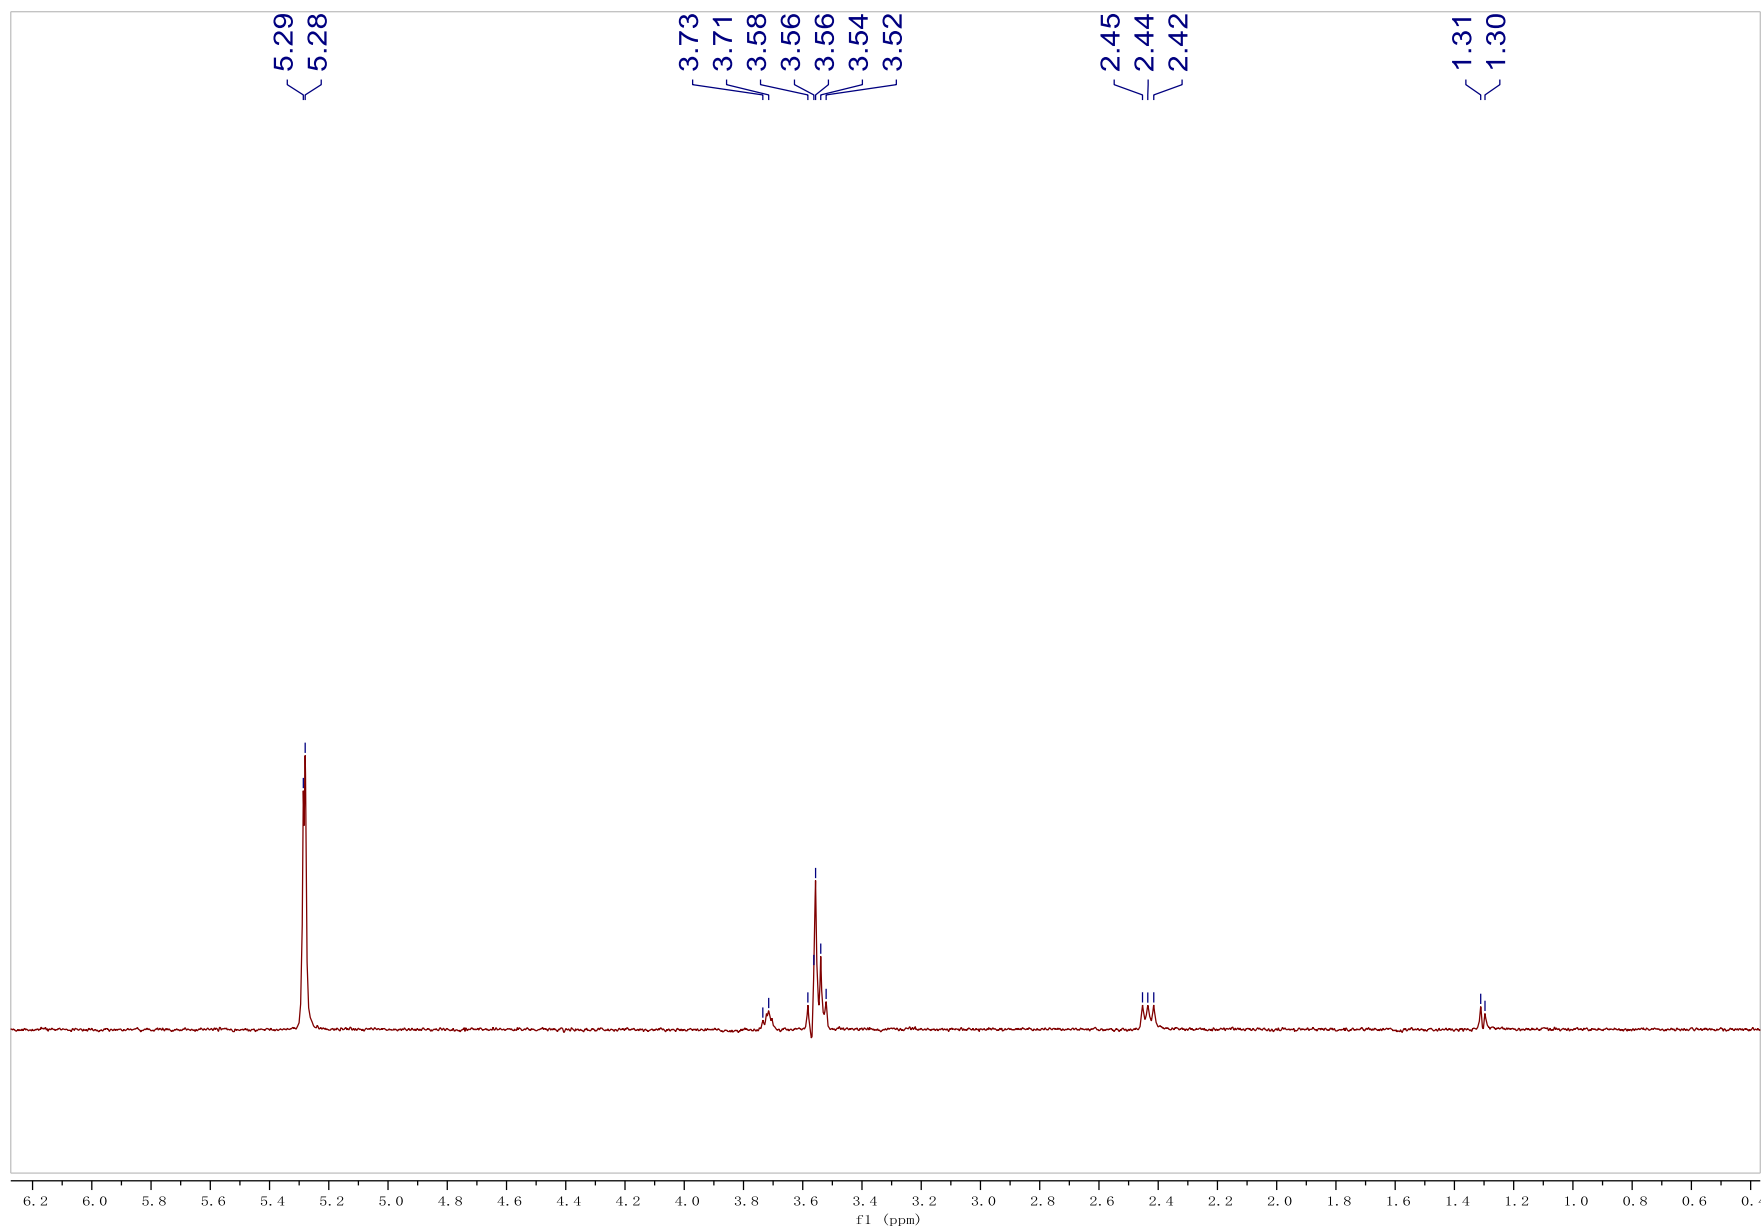

**Figure S55.** 1D-selective TOCSY spectrum of compound **12** (500 MHz, D<sub>2</sub>O, excitation at  $\delta$  5.28, H-D1).

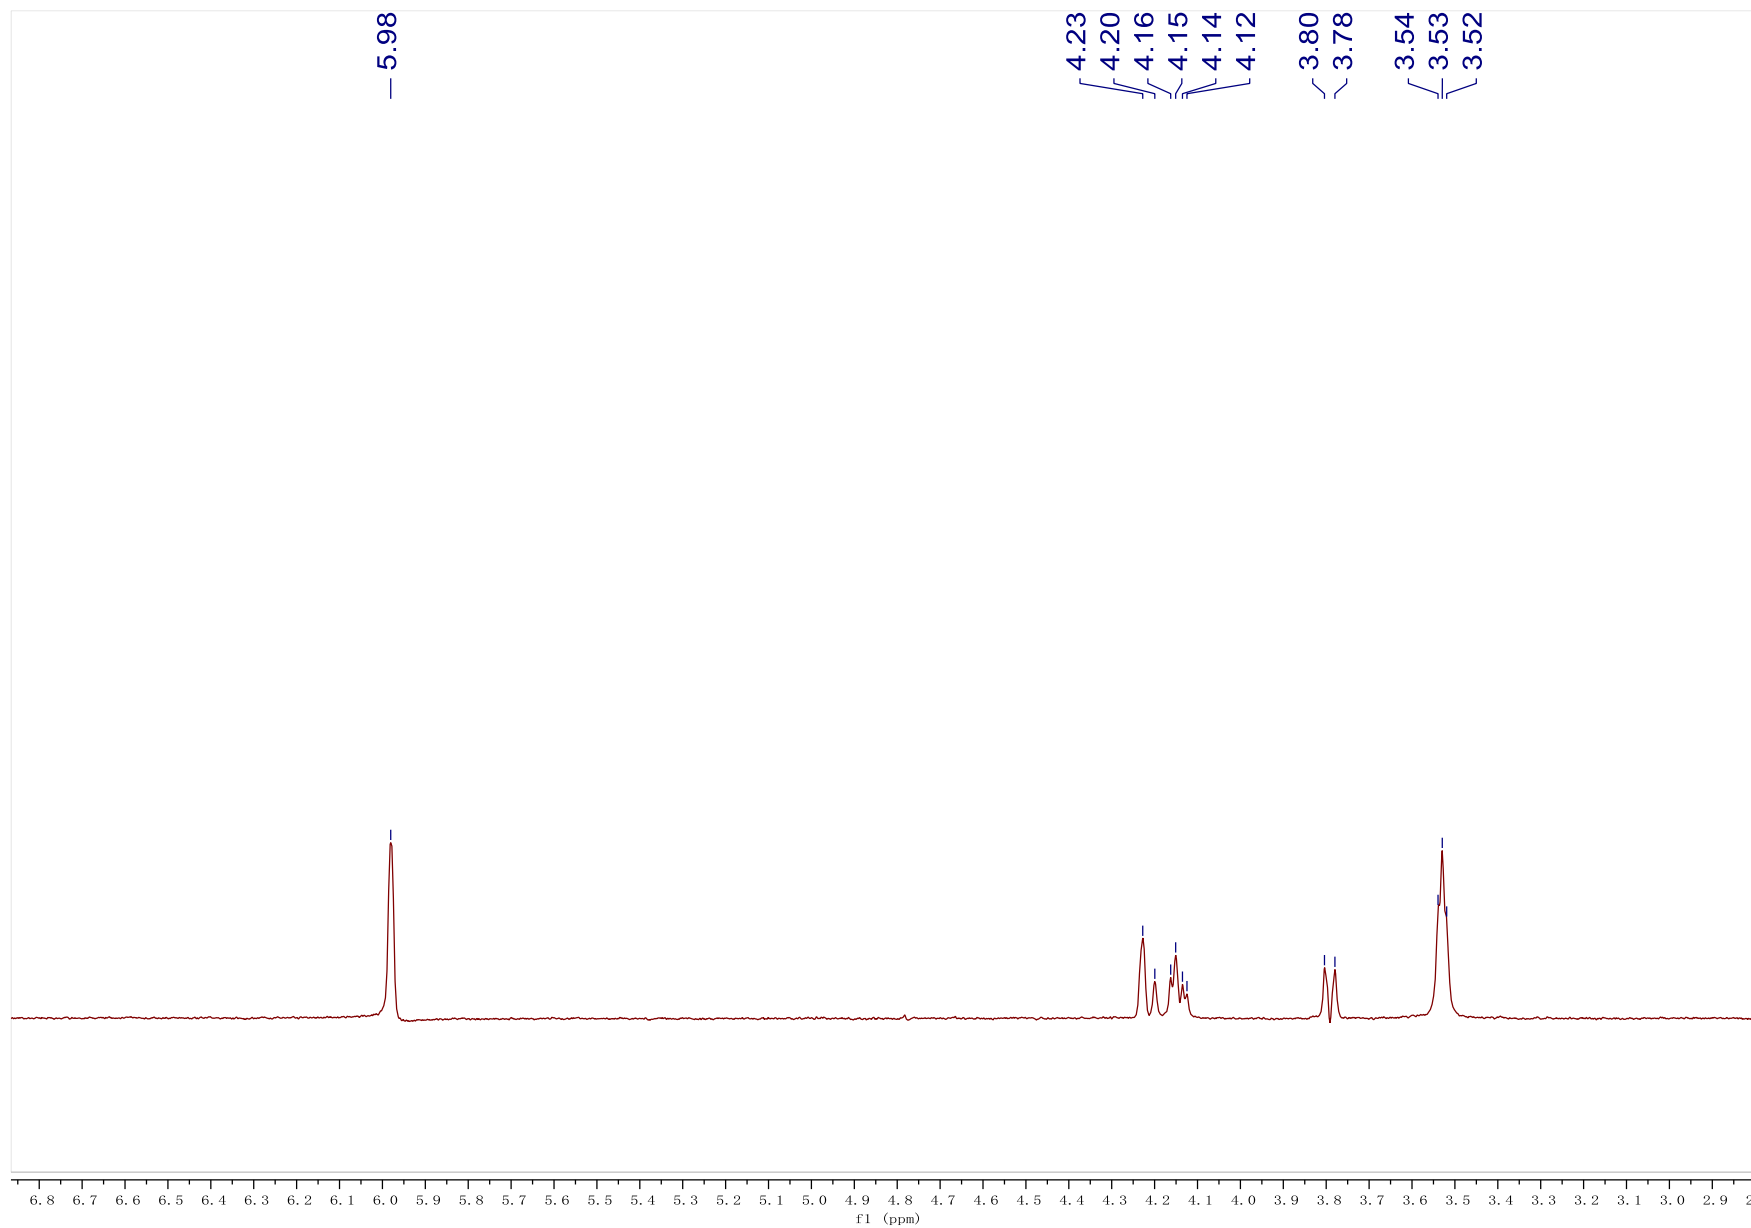

**Figure S56.** 1D-selective TOCSY spectrum of compound **12** (500 MHz, D<sub>2</sub>O, excitation at  $\delta$  5.98, H-E1).

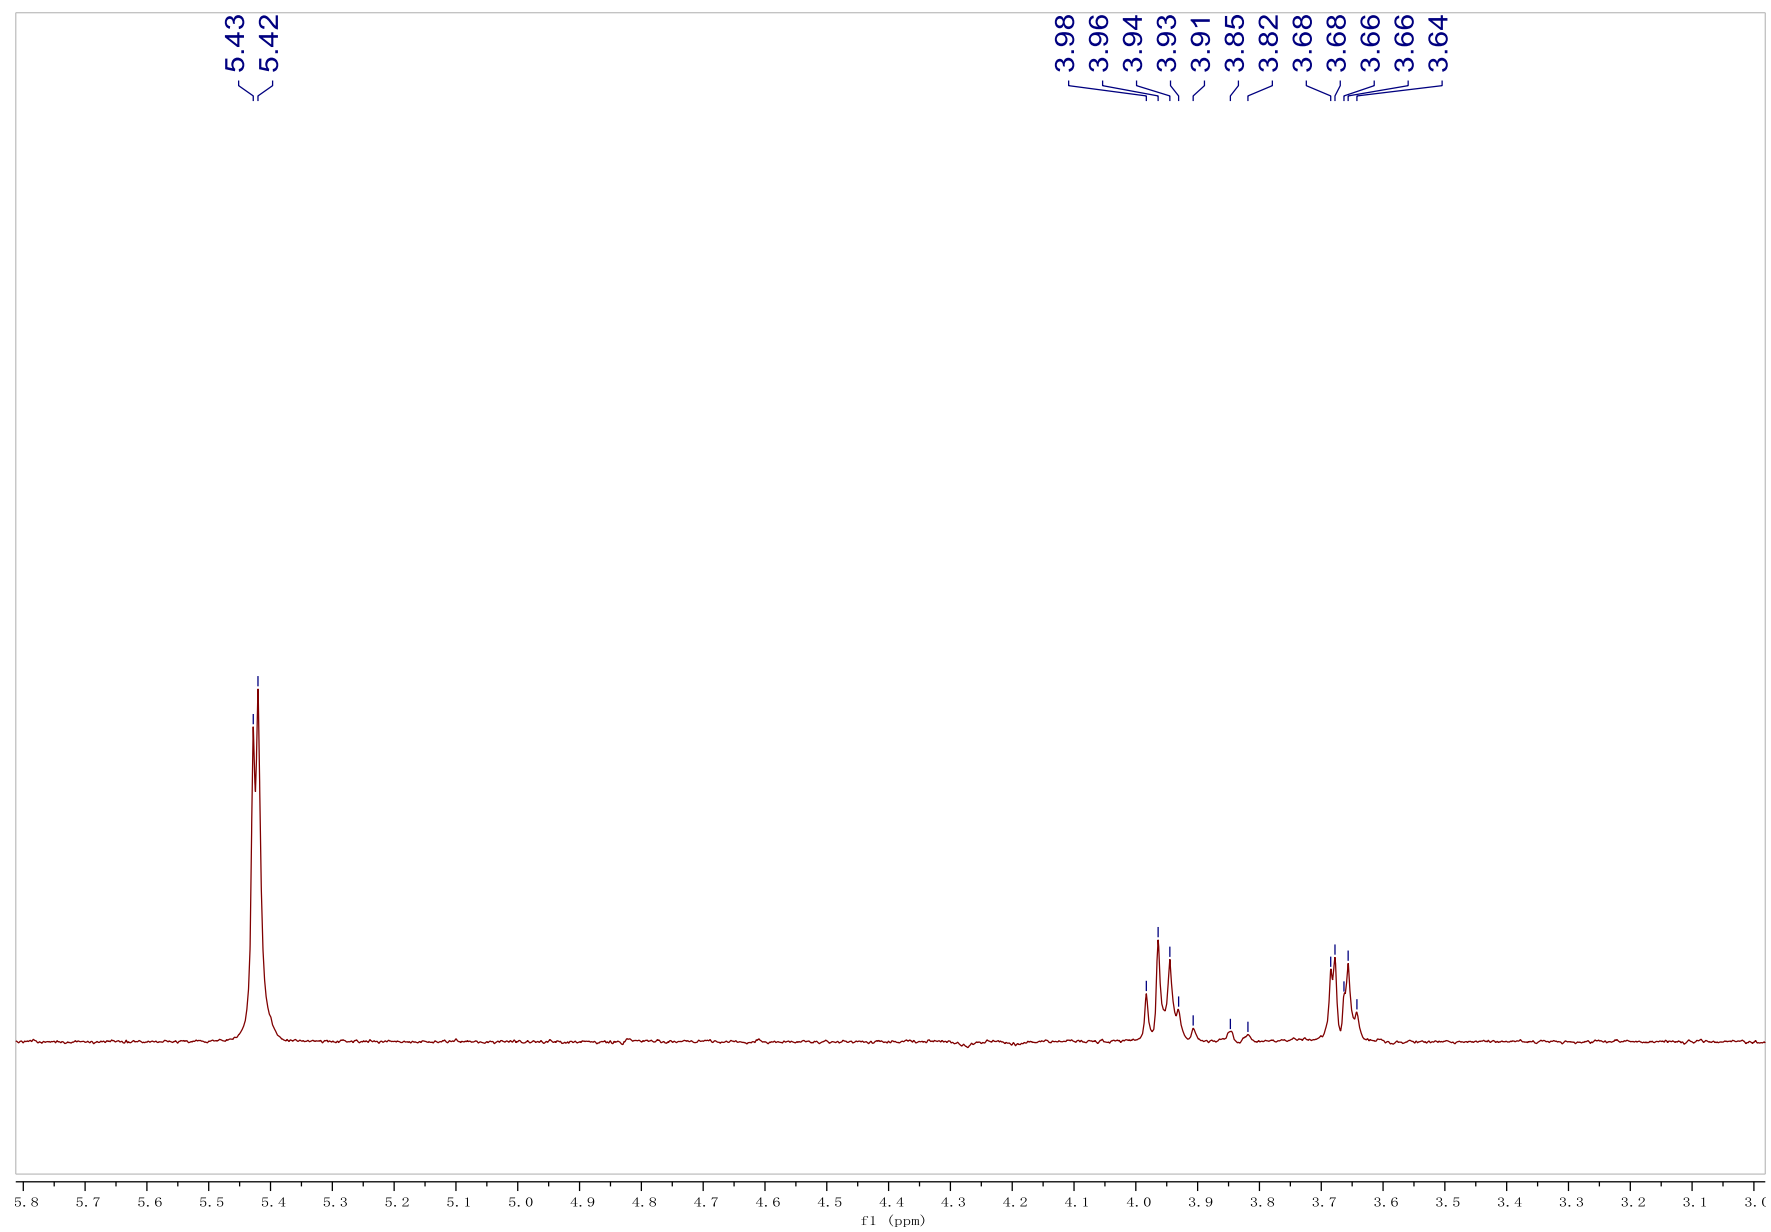

**Figure S57.** 1D-selective TOCSY spectrum of compound **12** (500 MHz, D<sub>2</sub>O, excitation at  $\delta$  5.42, H-F1).



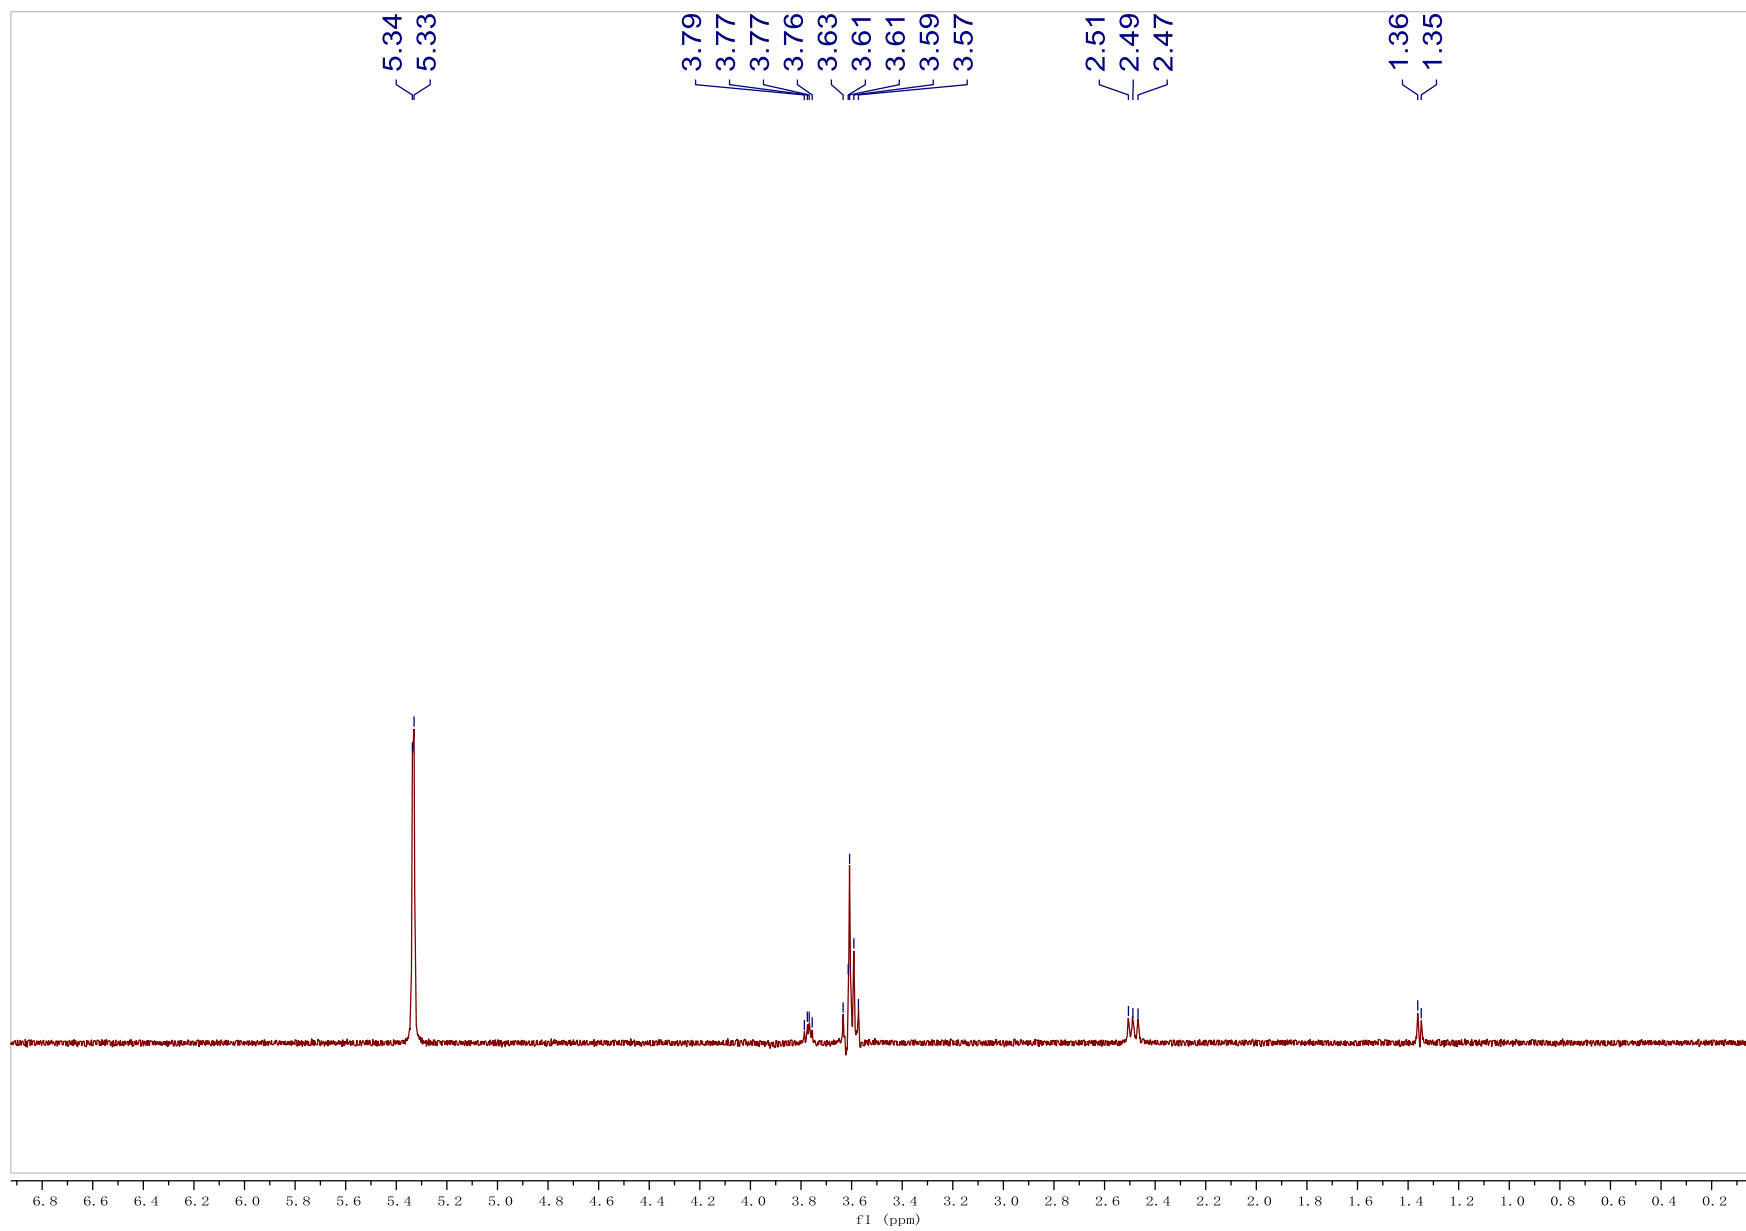

**Figure S58.** 1D-selective TOCSY spectrum of compound **12** (500 MHz, D<sub>2</sub>O, excitation at  $\delta$  5.33, H-G1).

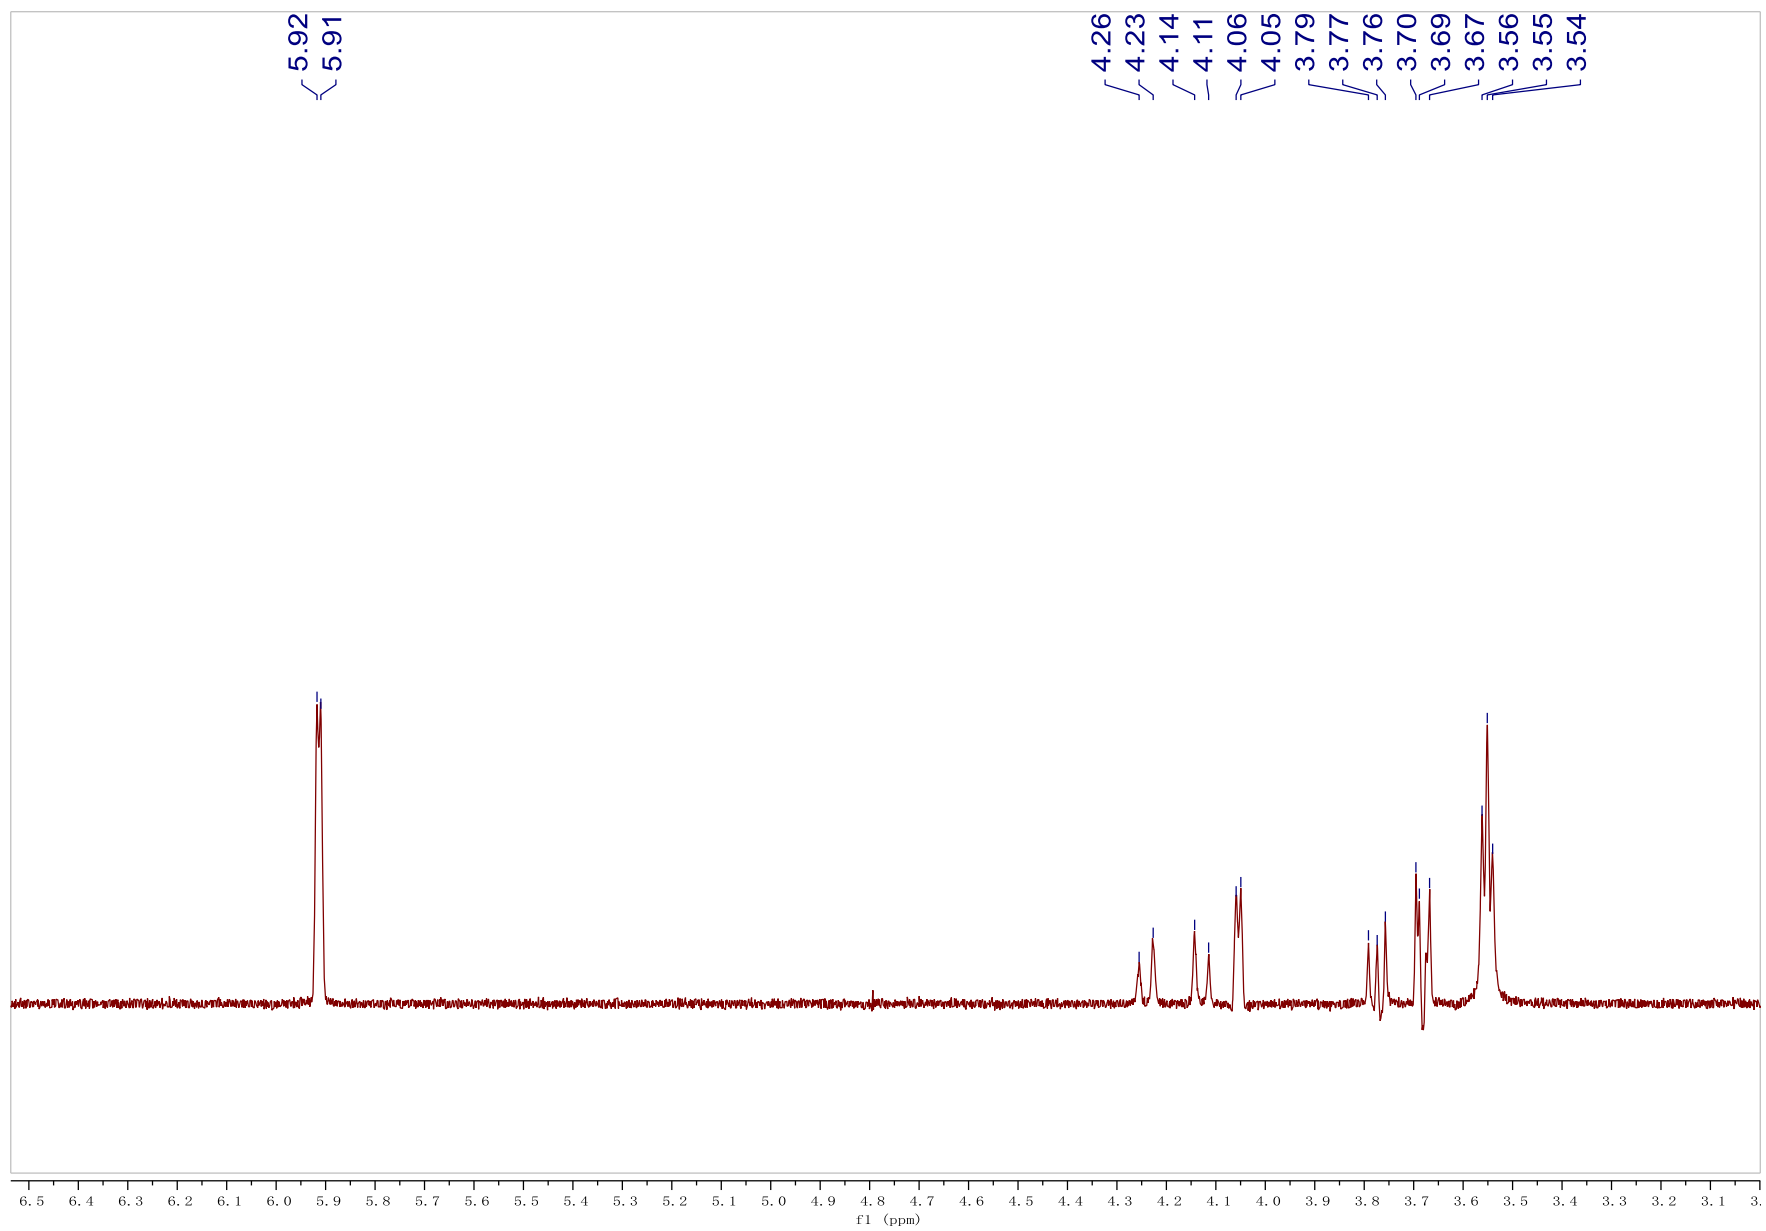

**Figure S59.** 1D-selective TOCSY spectrum of compound **12** (500 MHz, D<sub>2</sub>O, excitation at  $\delta$  5.91, H-H1).

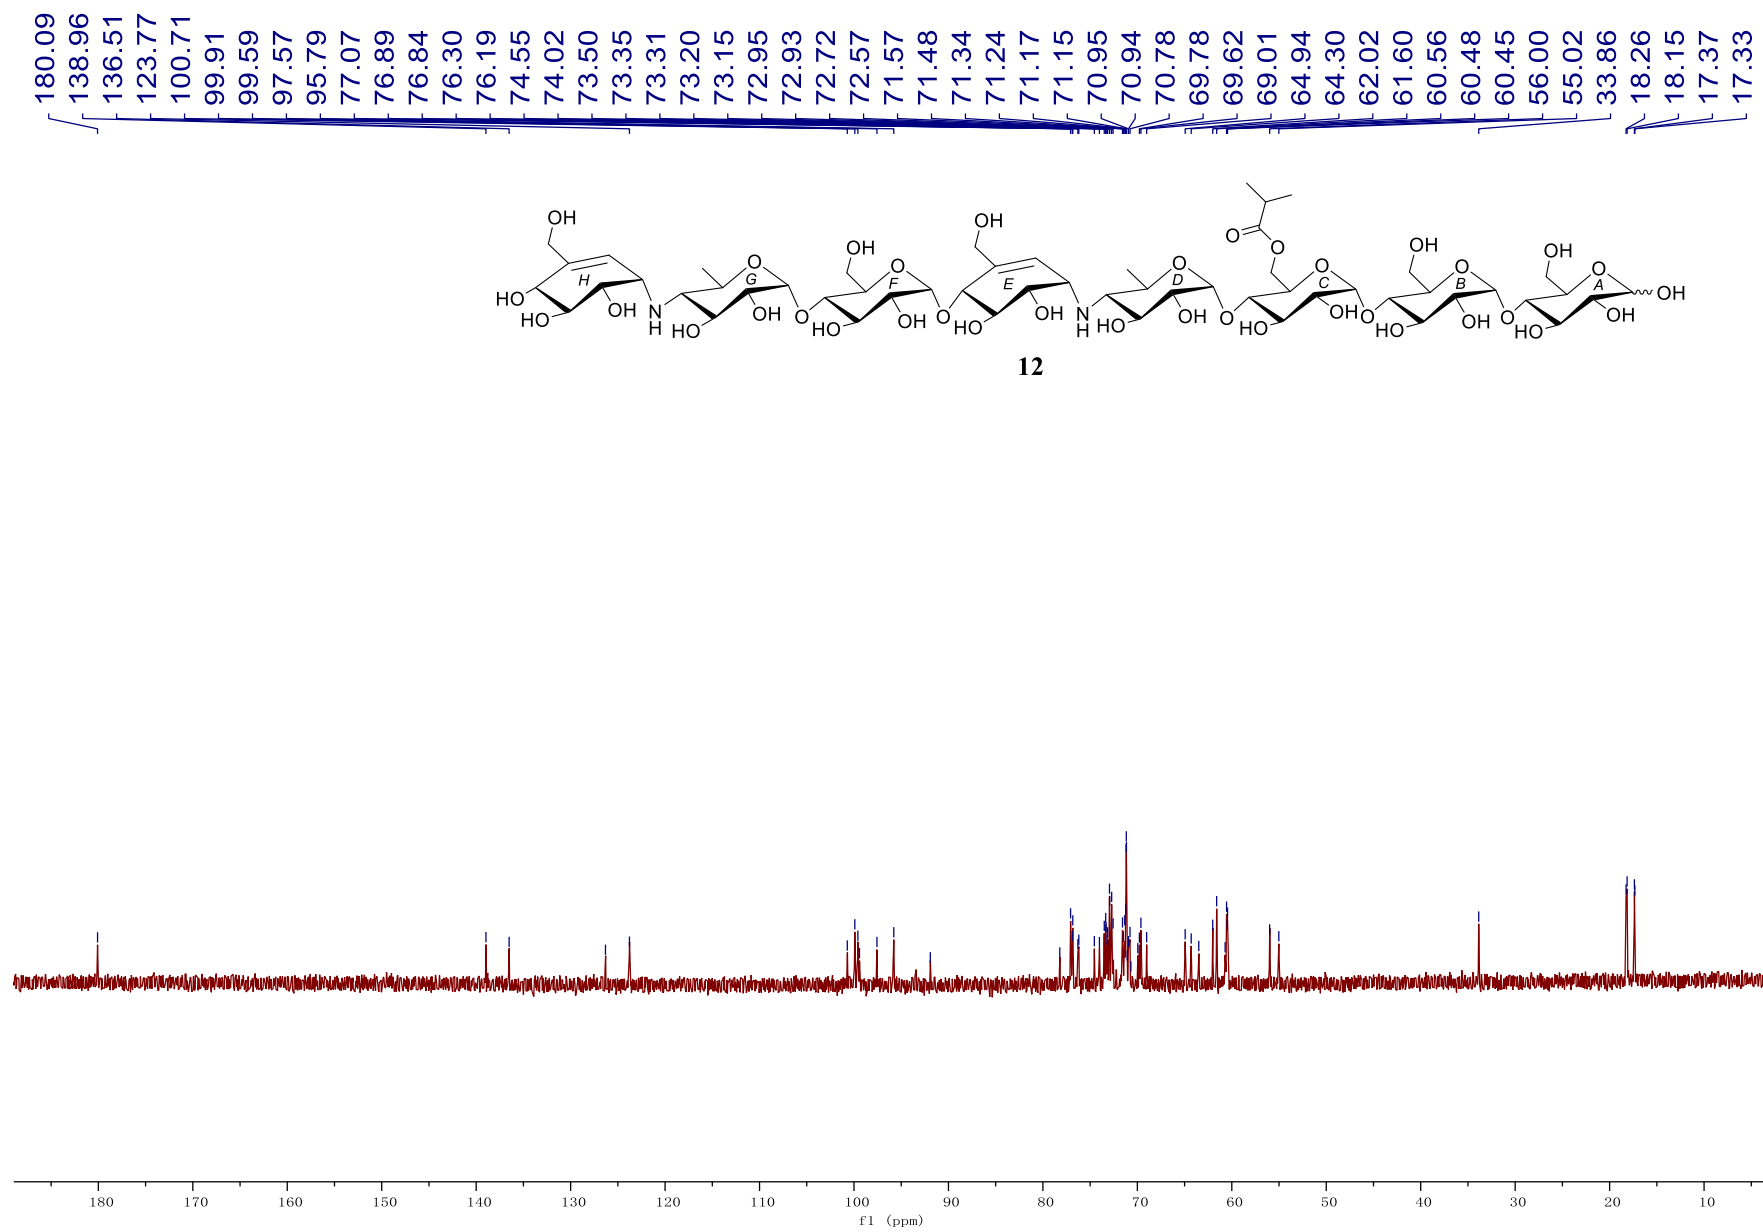

**Figure S60.**  $^{13}\text{C}$  NMR spectrum of compound **12** (125 MHz,  $\text{D}_2\text{O}$ ).

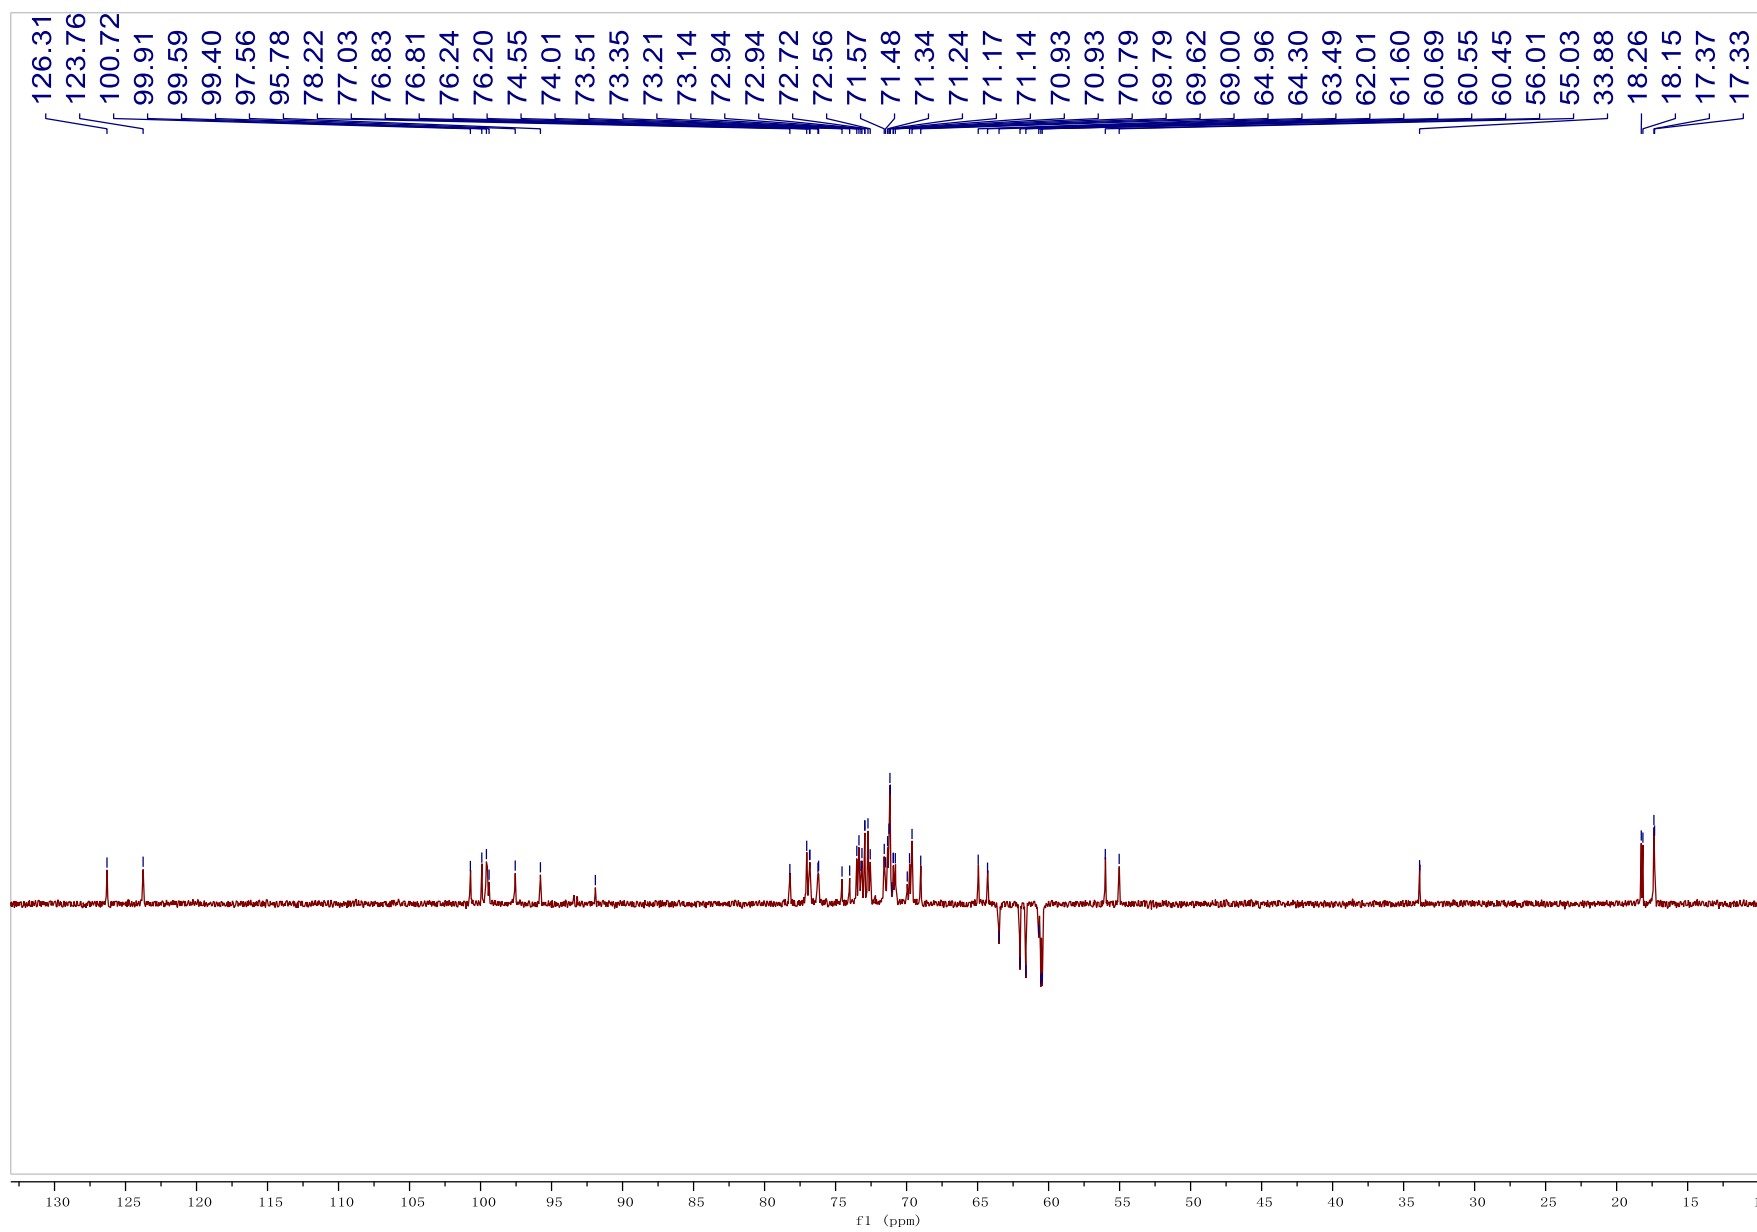

**Figure S61.** DEPT-135 spectrum of compound **12** (125 MHz, D<sub>2</sub>O).

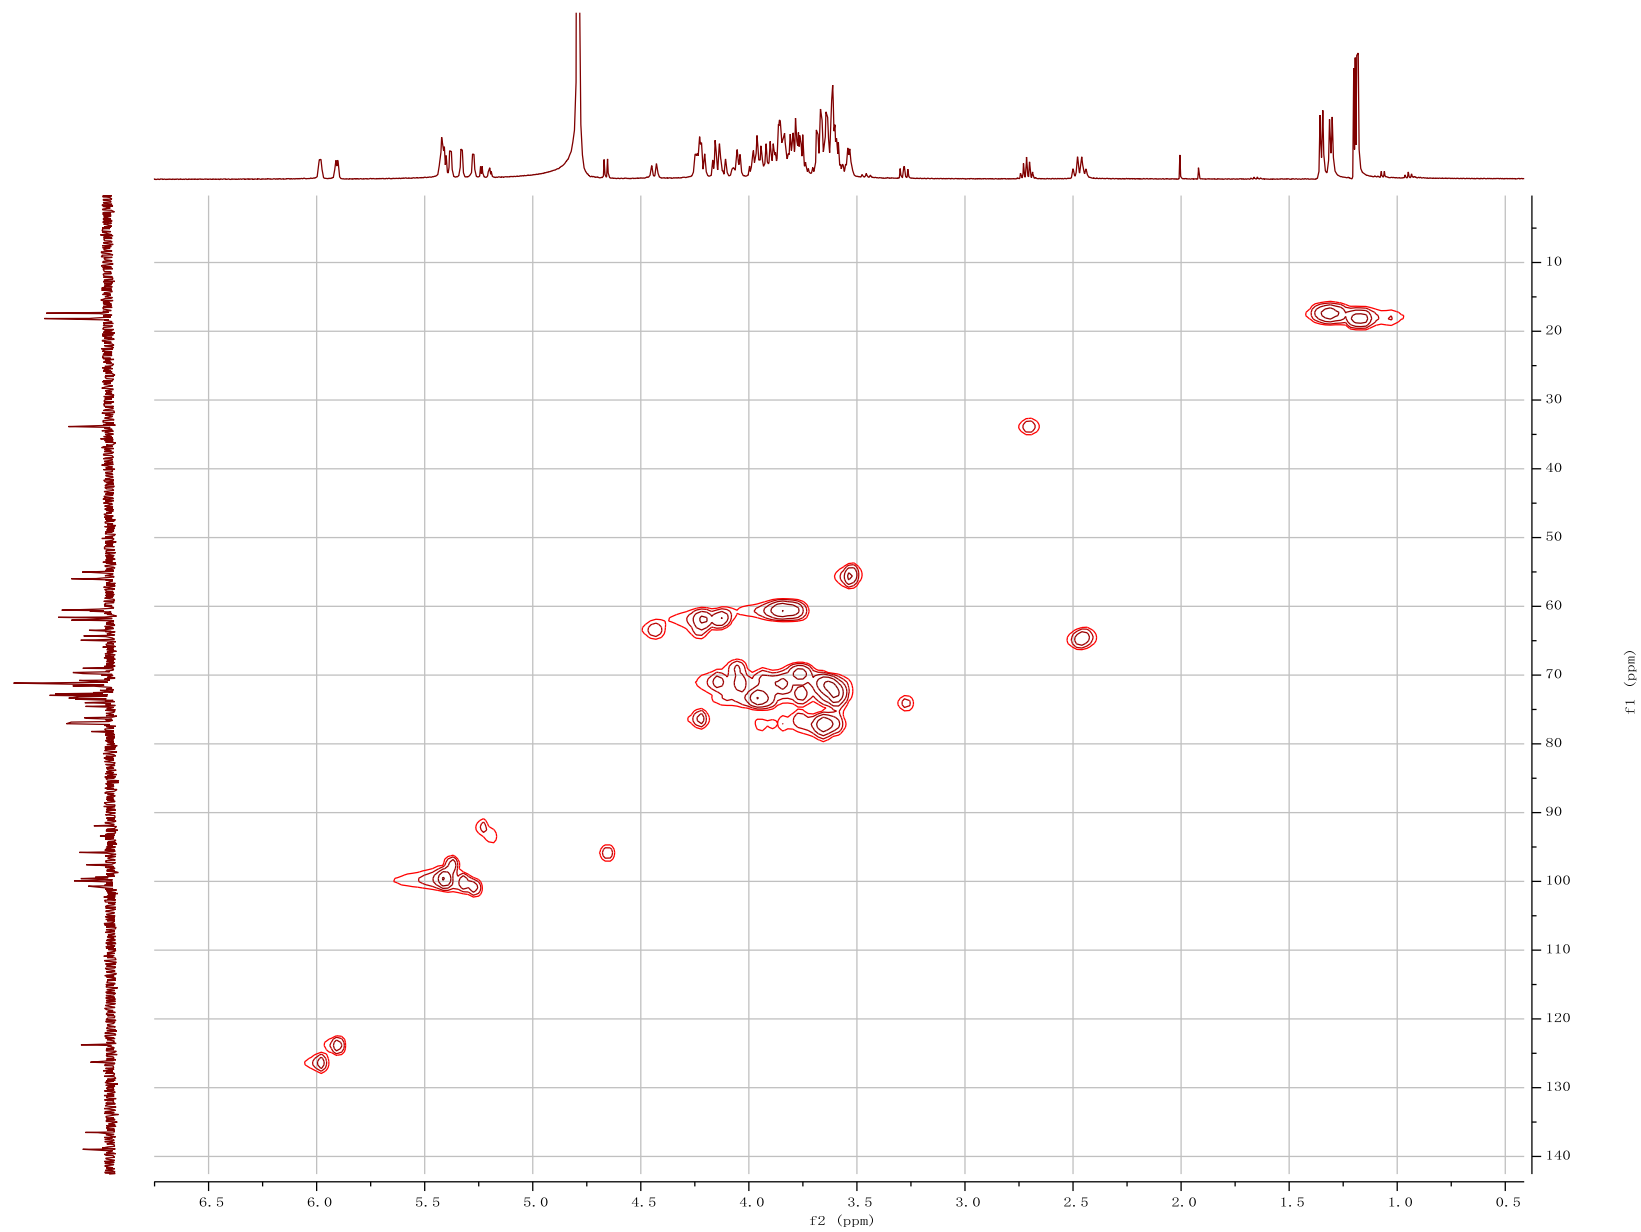

**Figure S62.** HSQC spectrum of compound **12** (500 MHz, D<sub>2</sub>O).

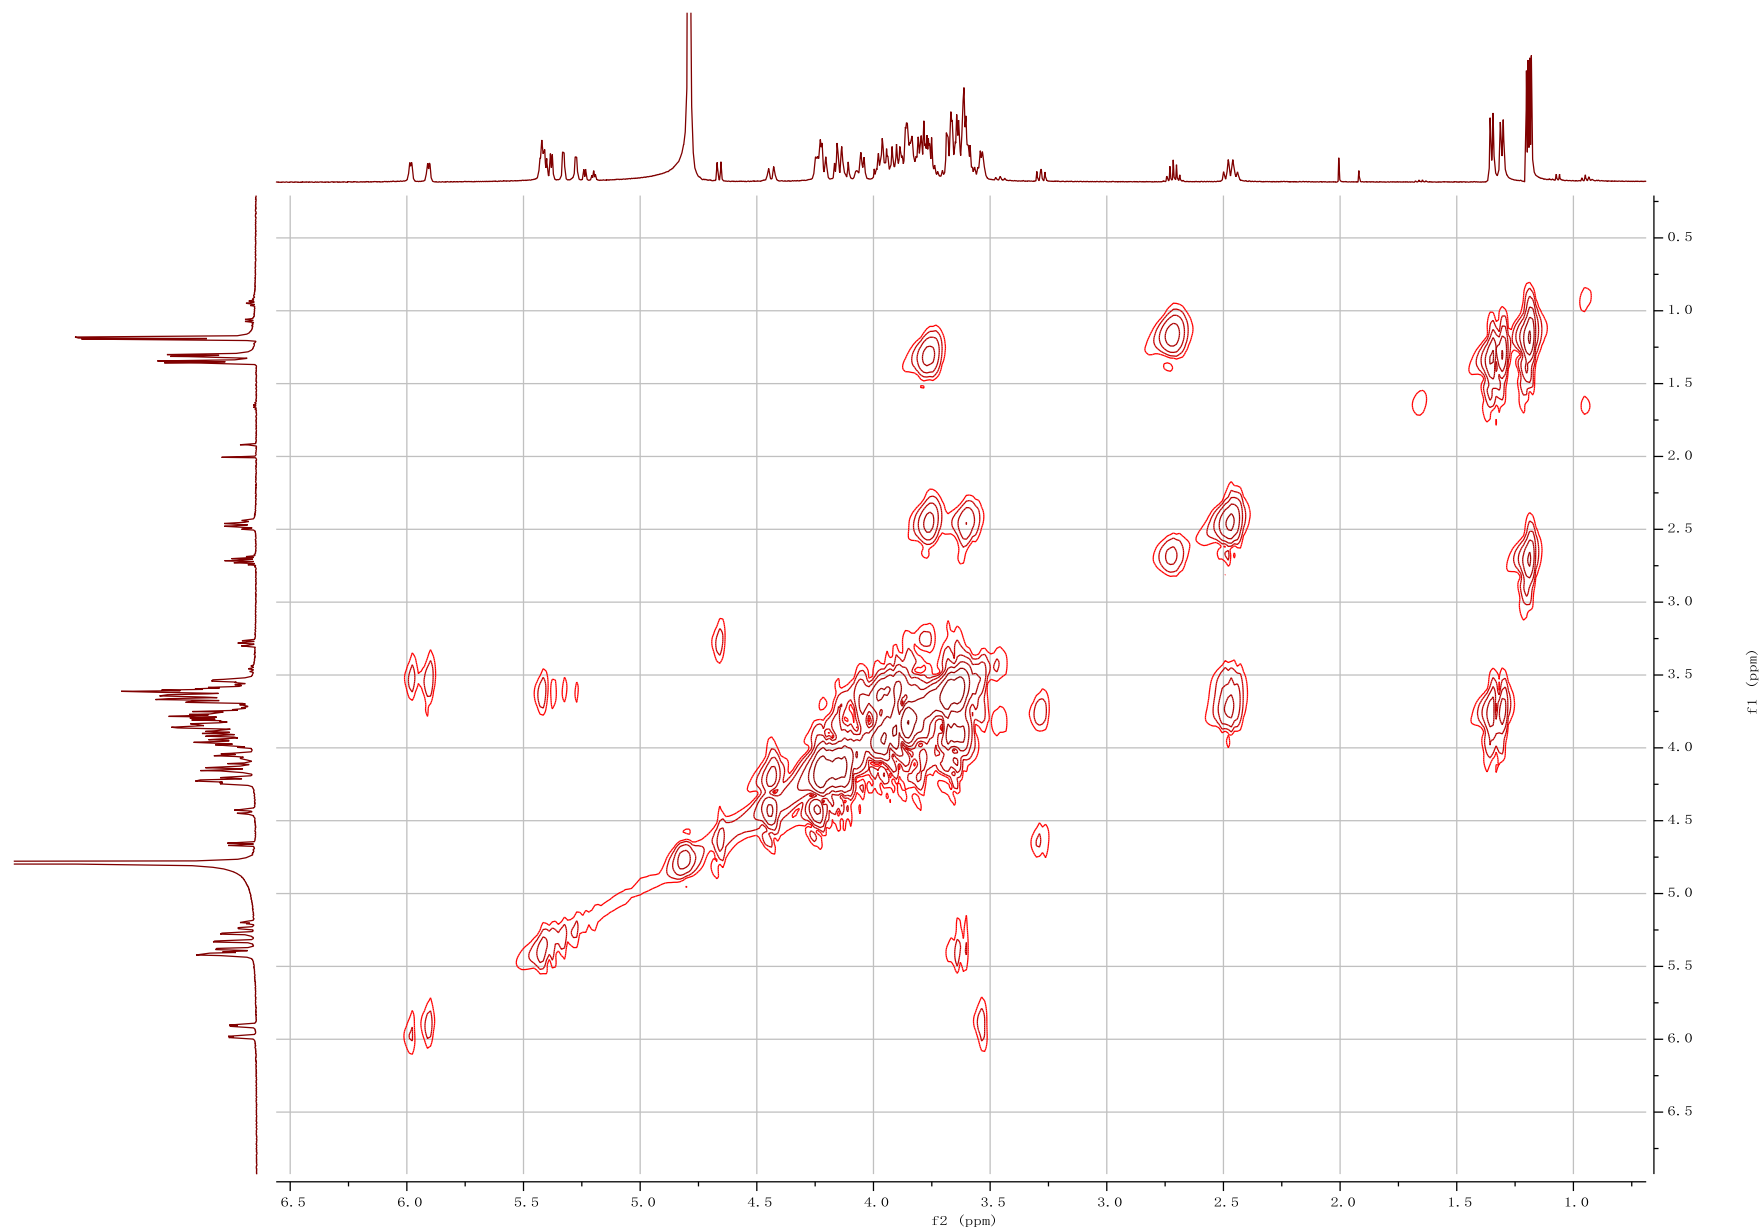

**Figure S63.**  $^1\text{H}$ - $^1\text{H}$  COSY spectrum of compound **12** (500 MHz,  $\text{D}_2\text{O}$ ).

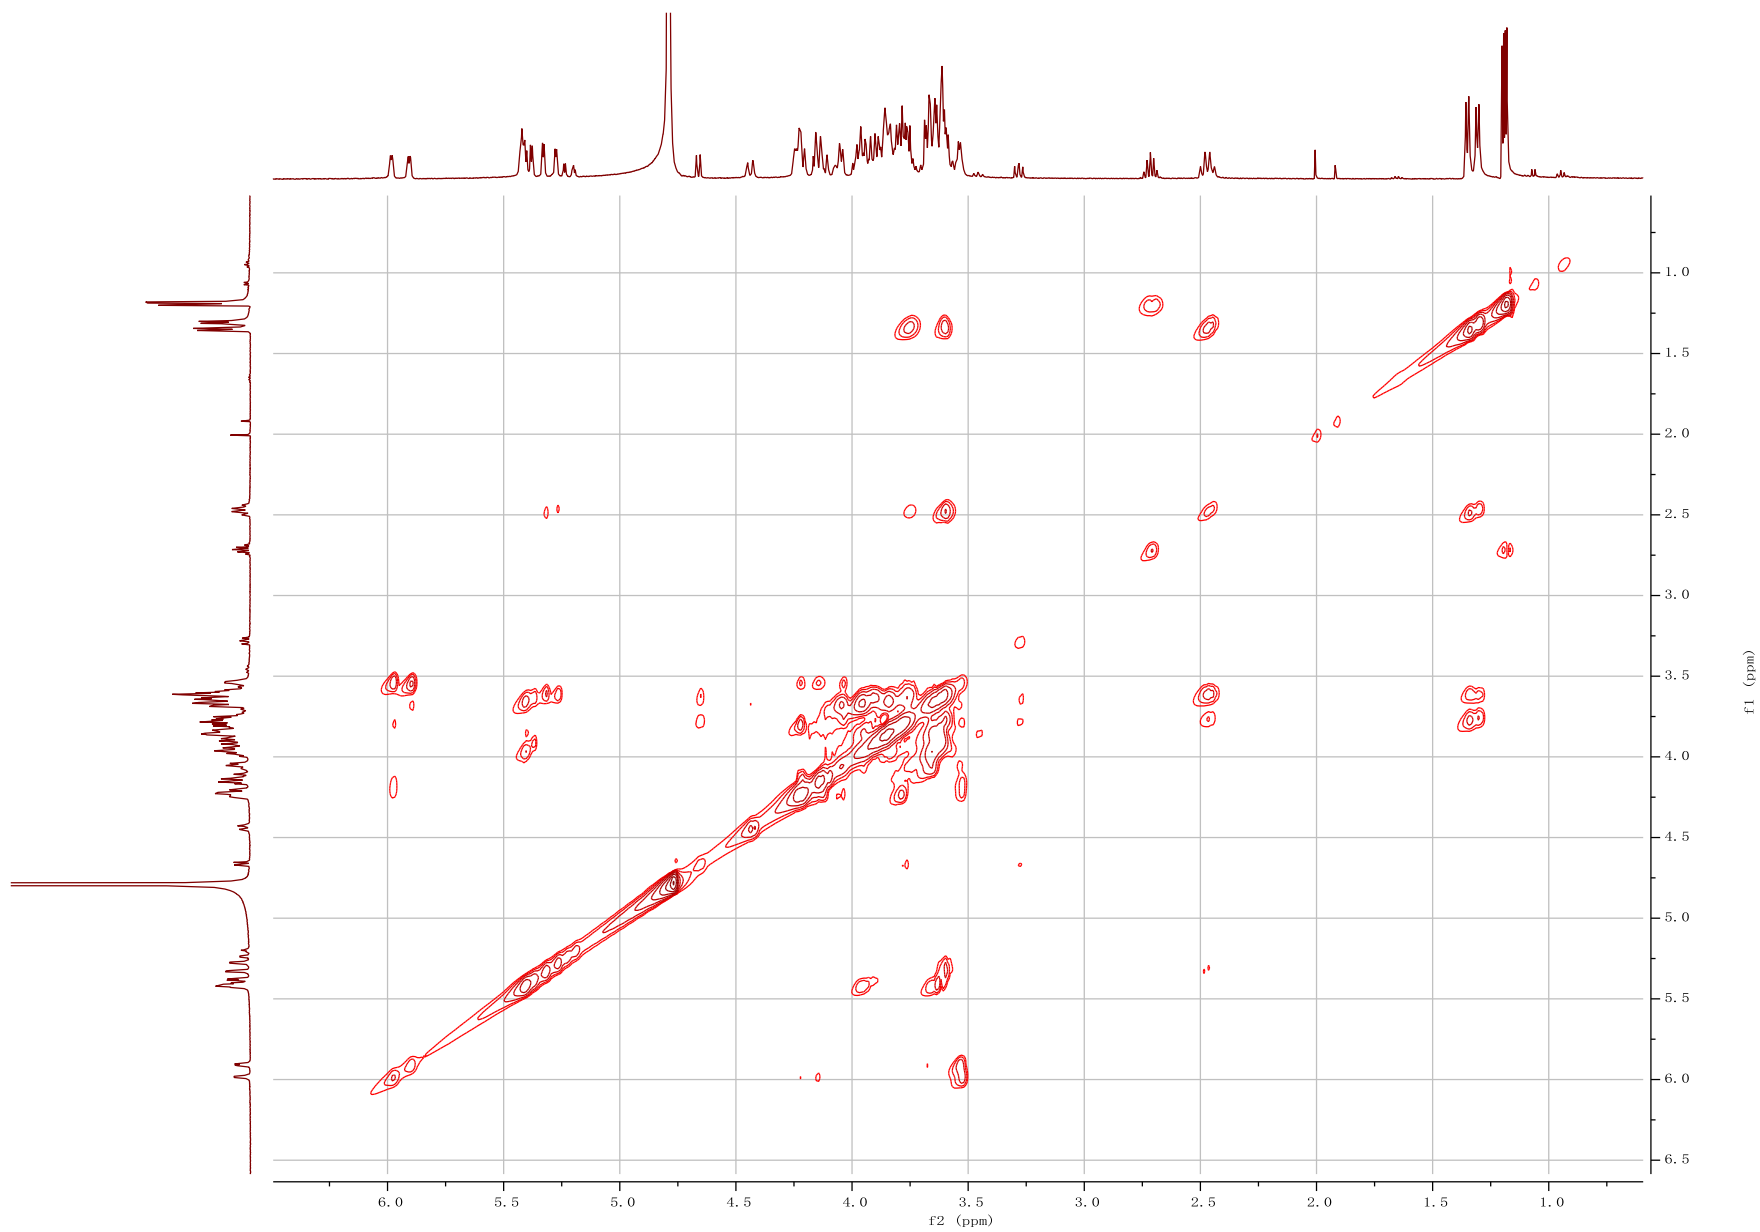

**Figure S64.** 2D-TOCSY spectrum of compound **12** (500 MHz, D<sub>2</sub>O).

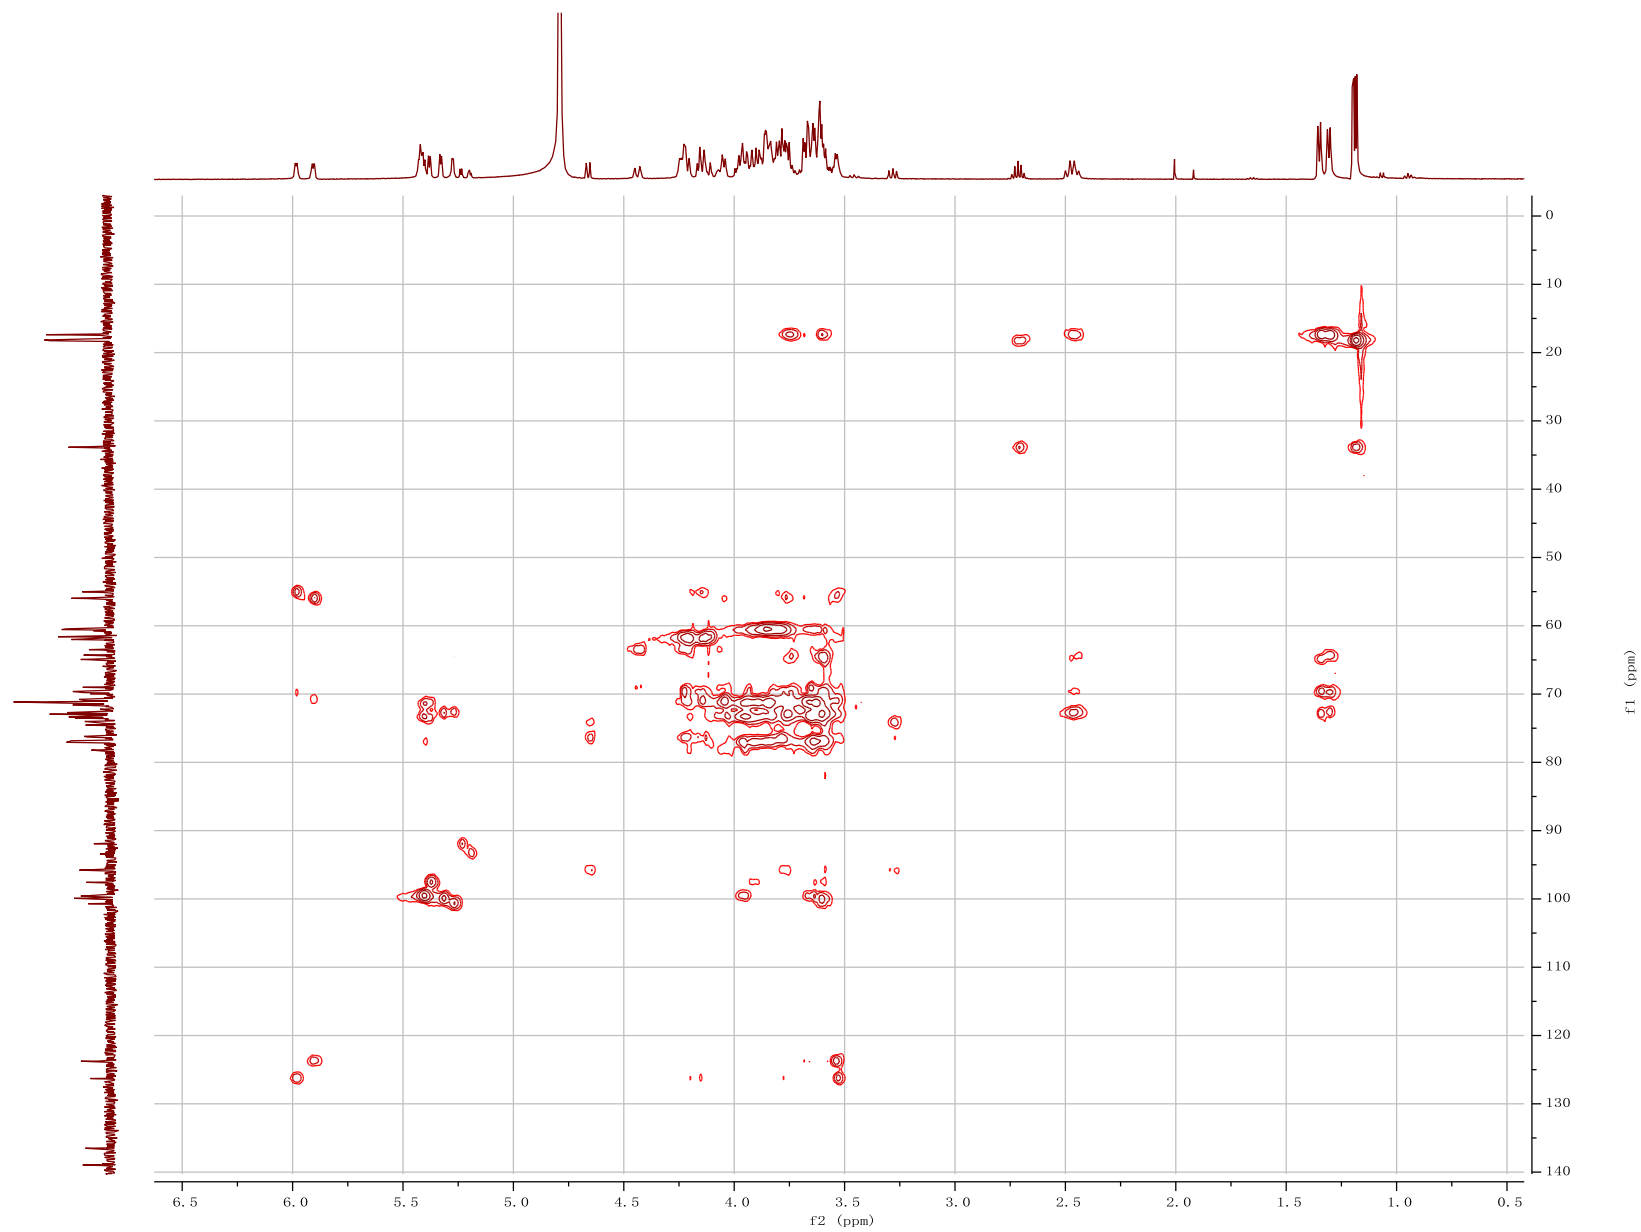

**Figure S65.** HSQC-TOCSY spectrum of compound **12** (500 MHz, D<sub>2</sub>O).



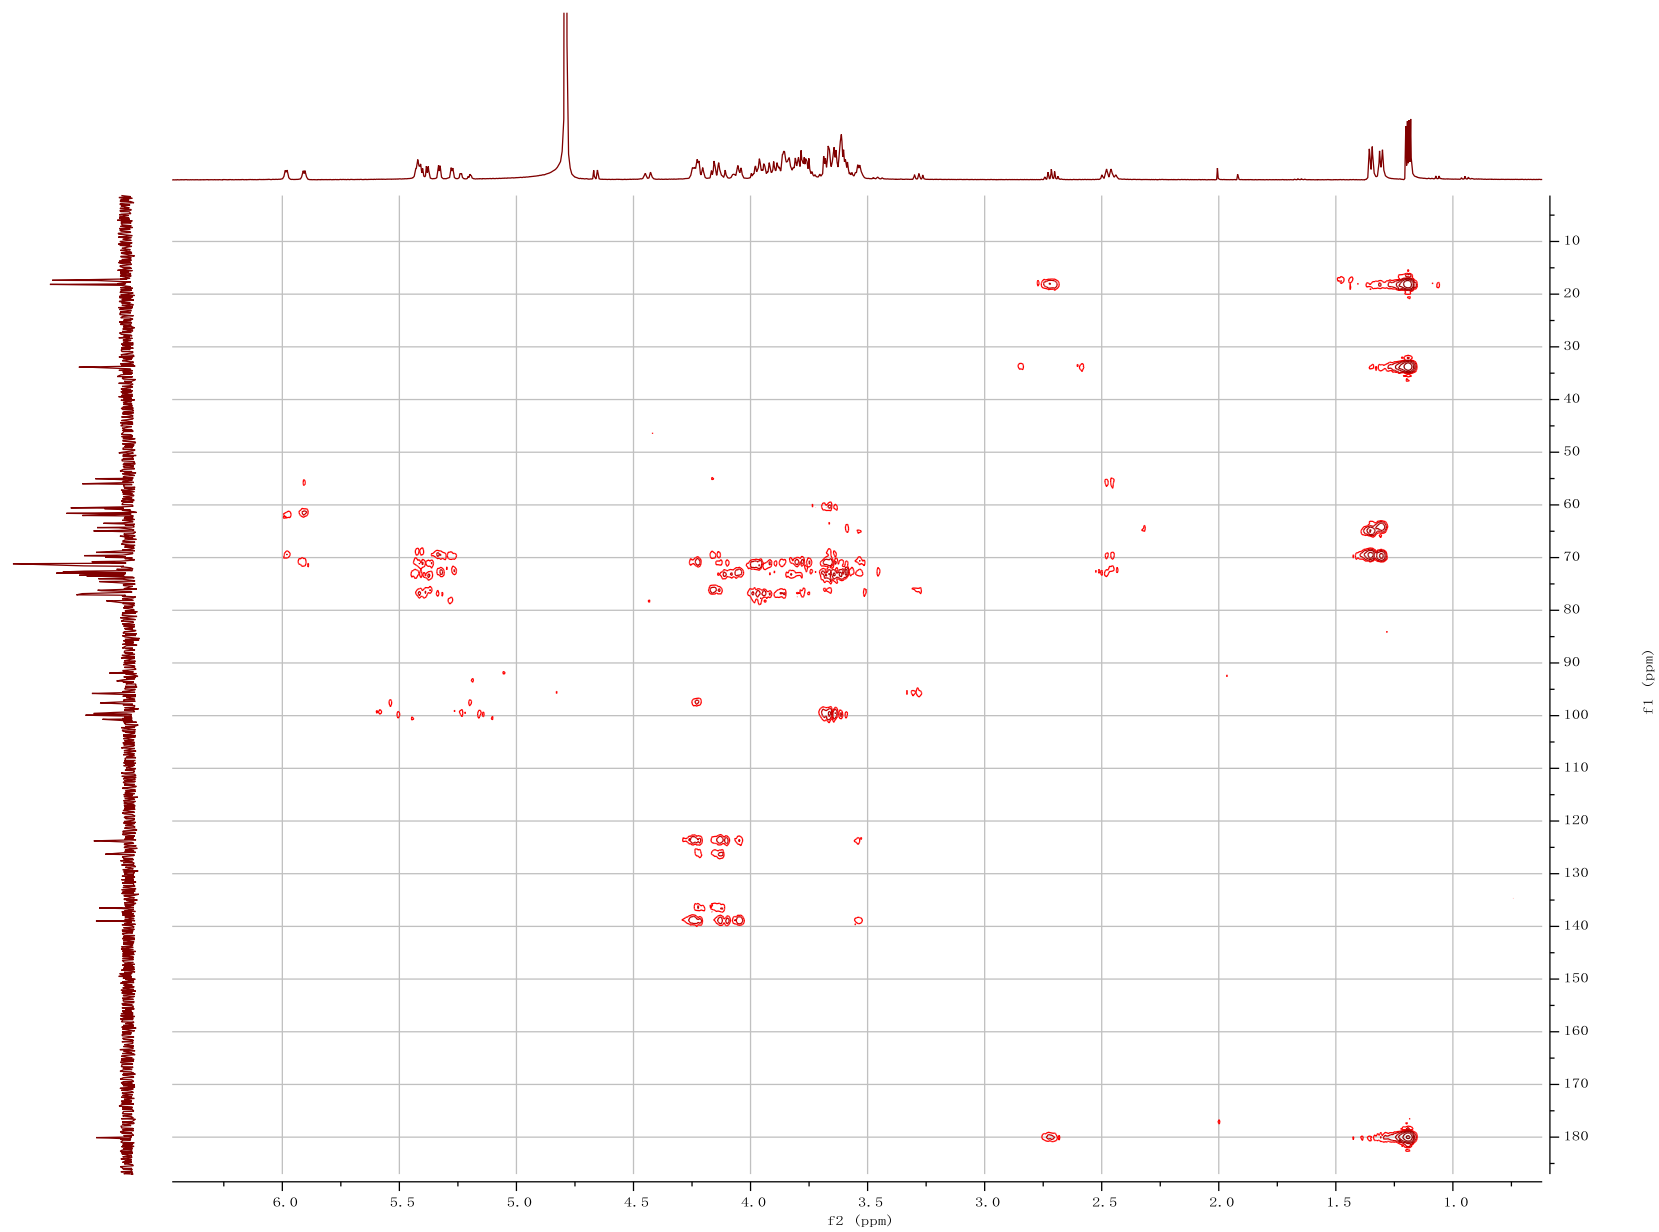

**Figure S66.** HMBC spectrum of compound **12** (500 MHz, D<sub>2</sub>O).

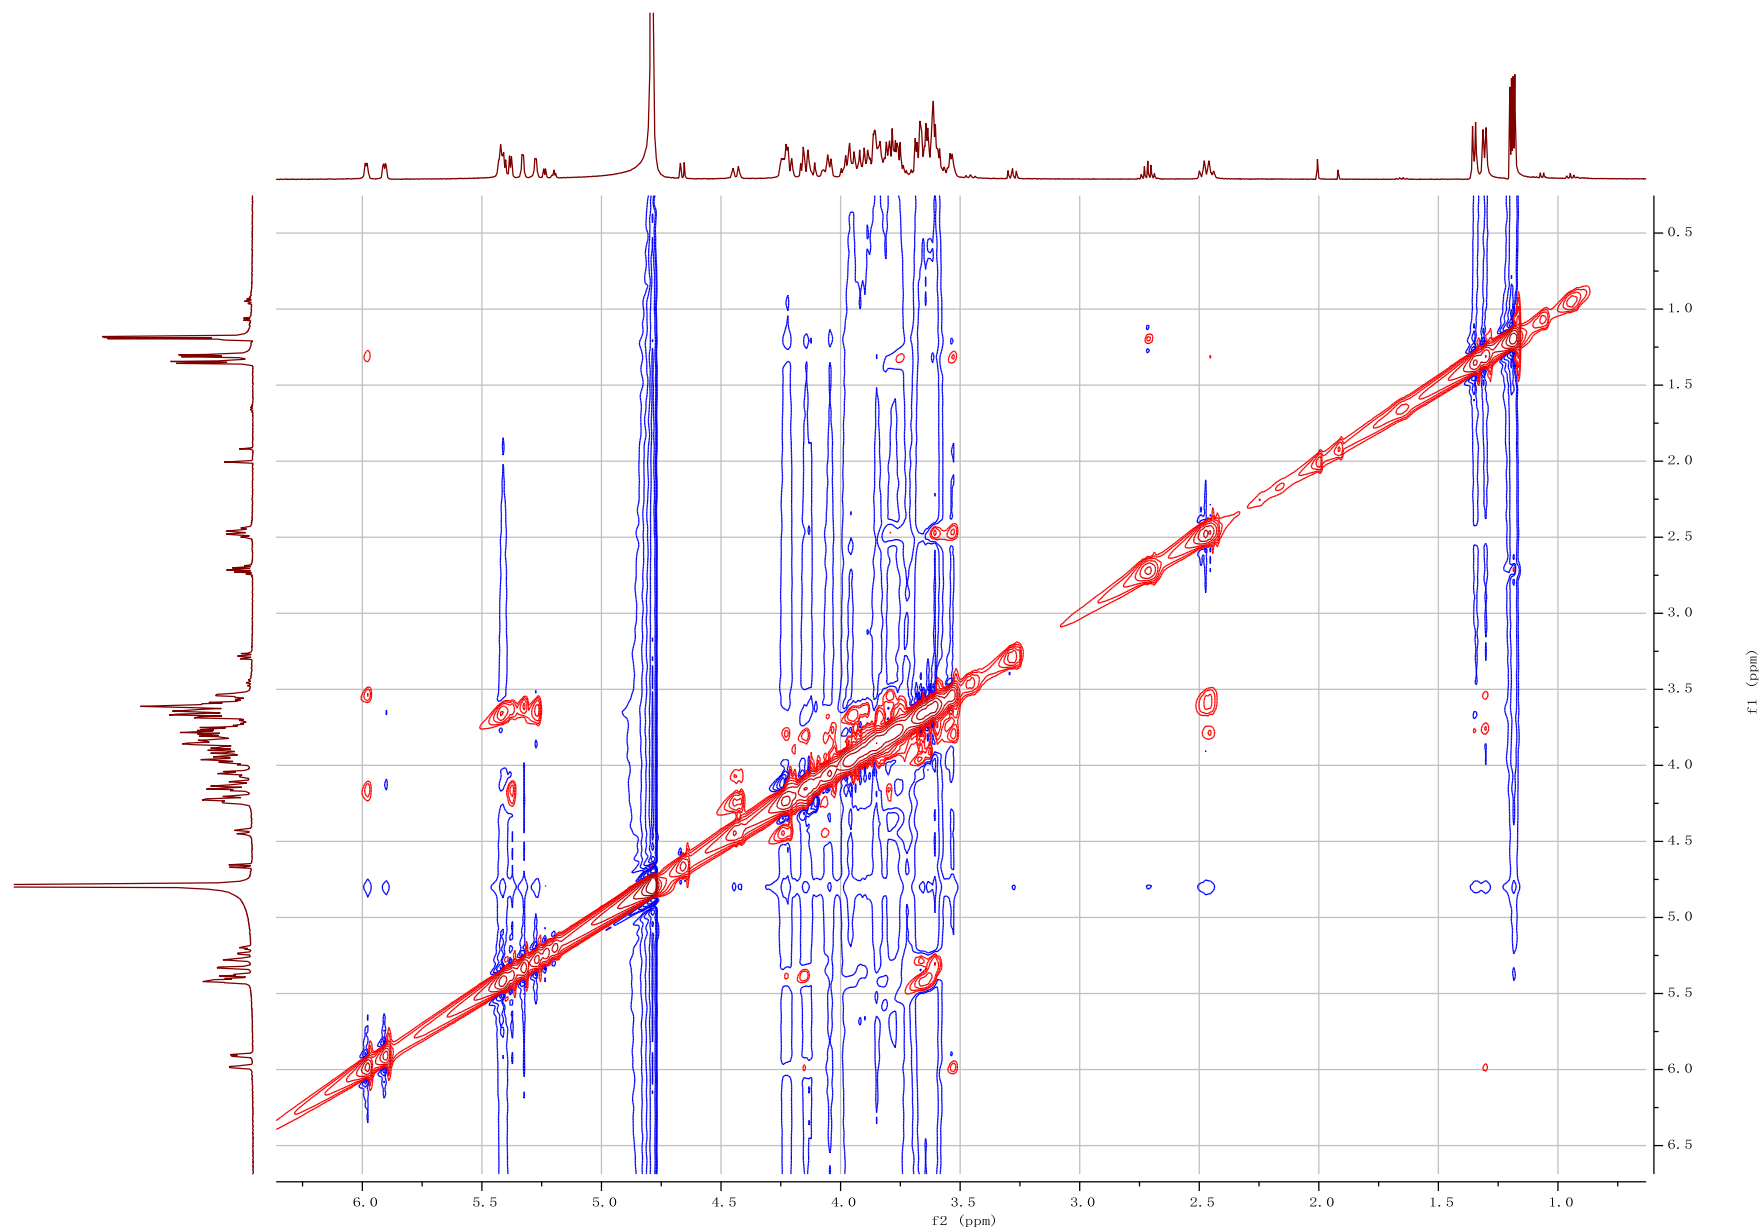

**Figure S67.** NOESY spectrum of compound **12** (500 MHz, D<sub>2</sub>O).

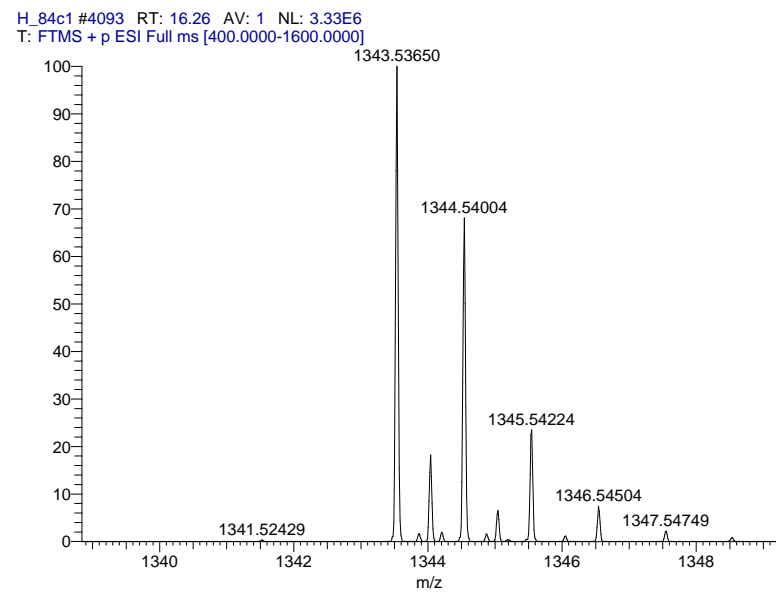

**Figure S68.** HRESIMS spectrum of compound **12**.

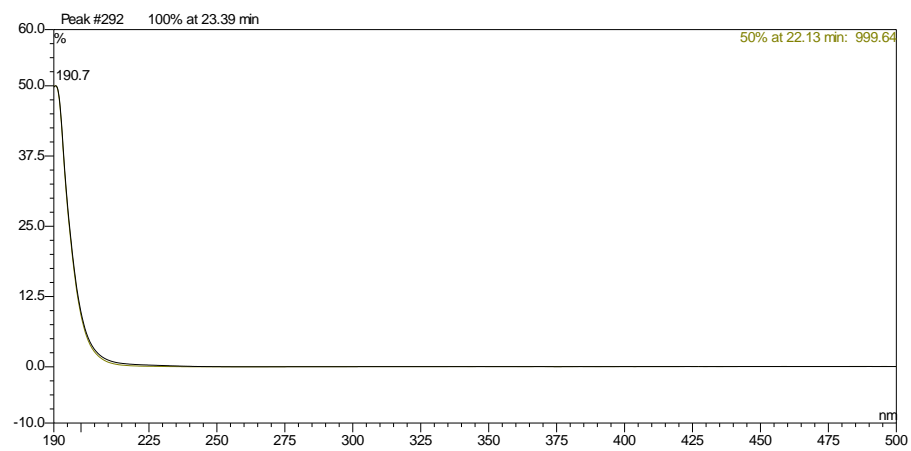

**Figure S69.** UV spectrum of compound **12**.

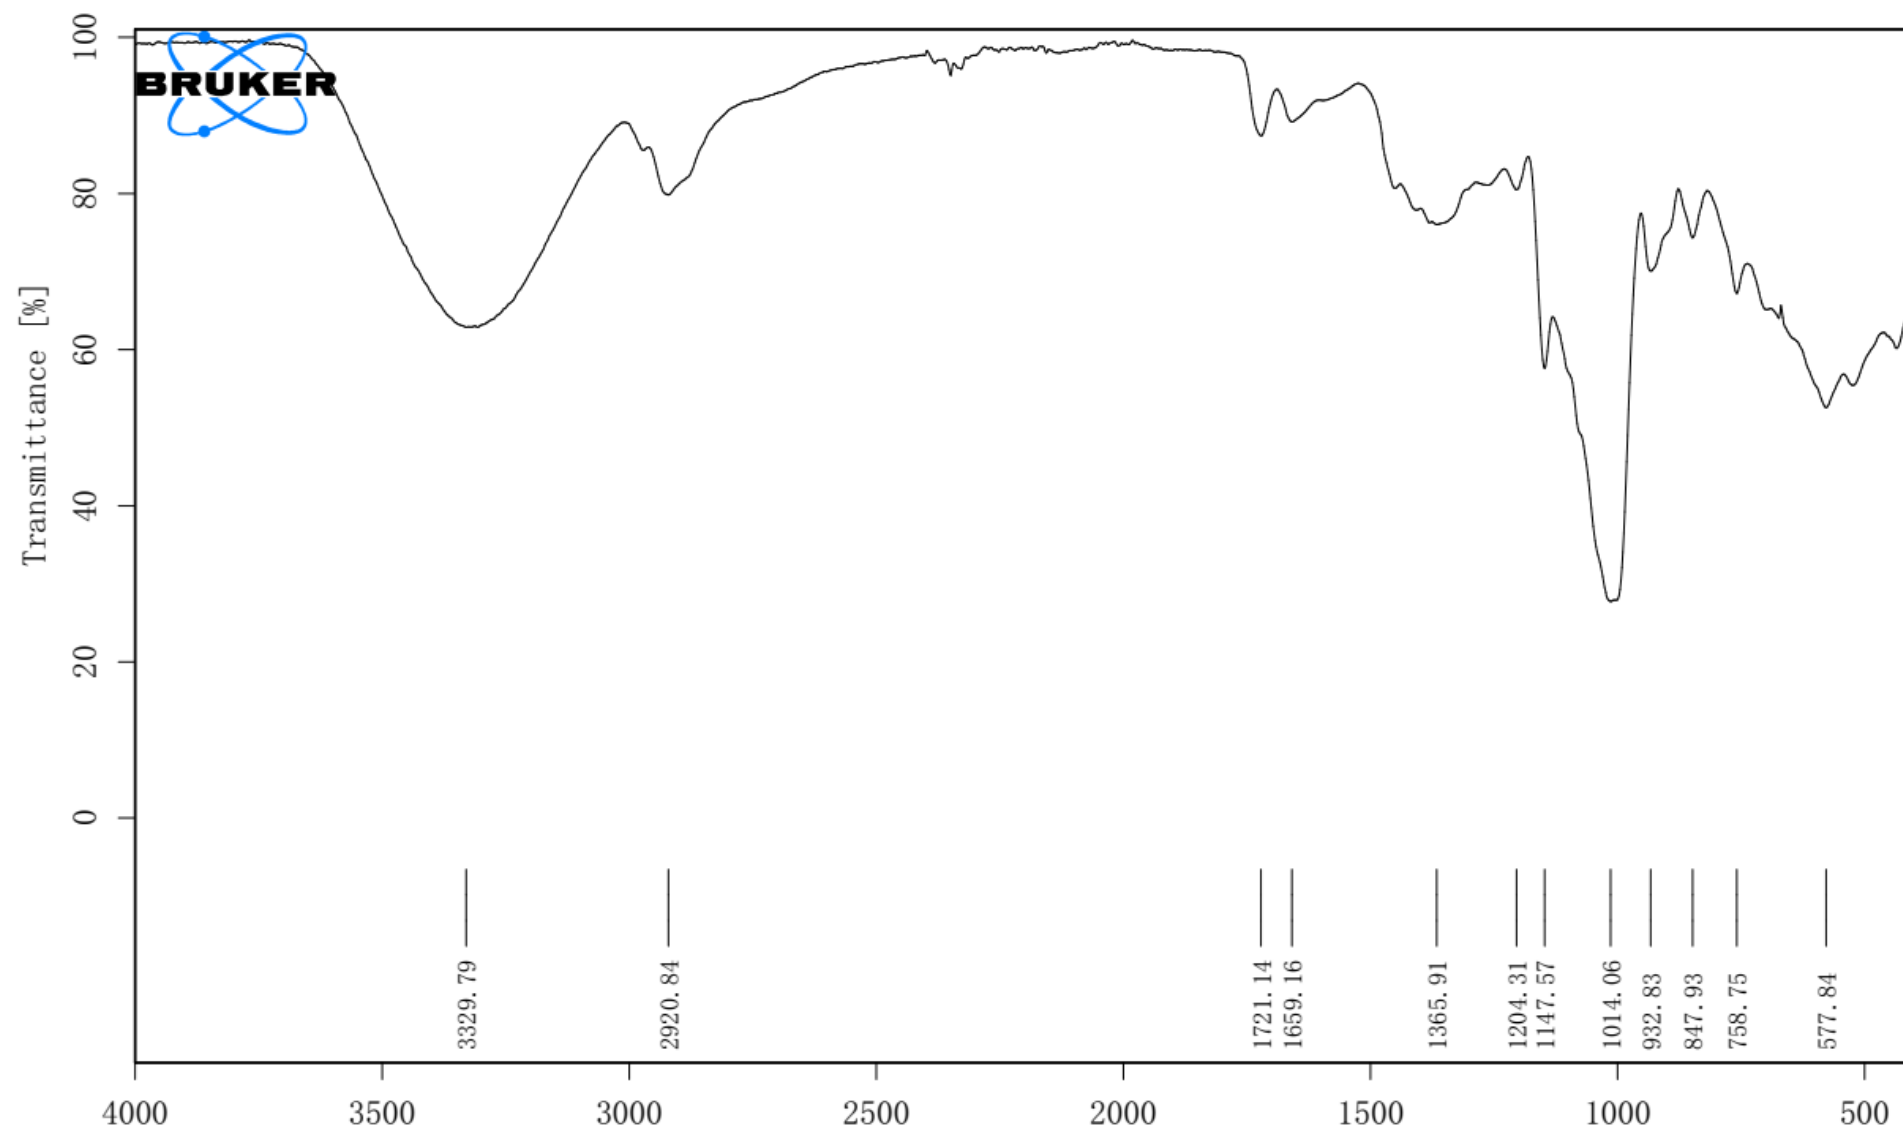

**Figure S70.** IR spectrum of compound **12**.

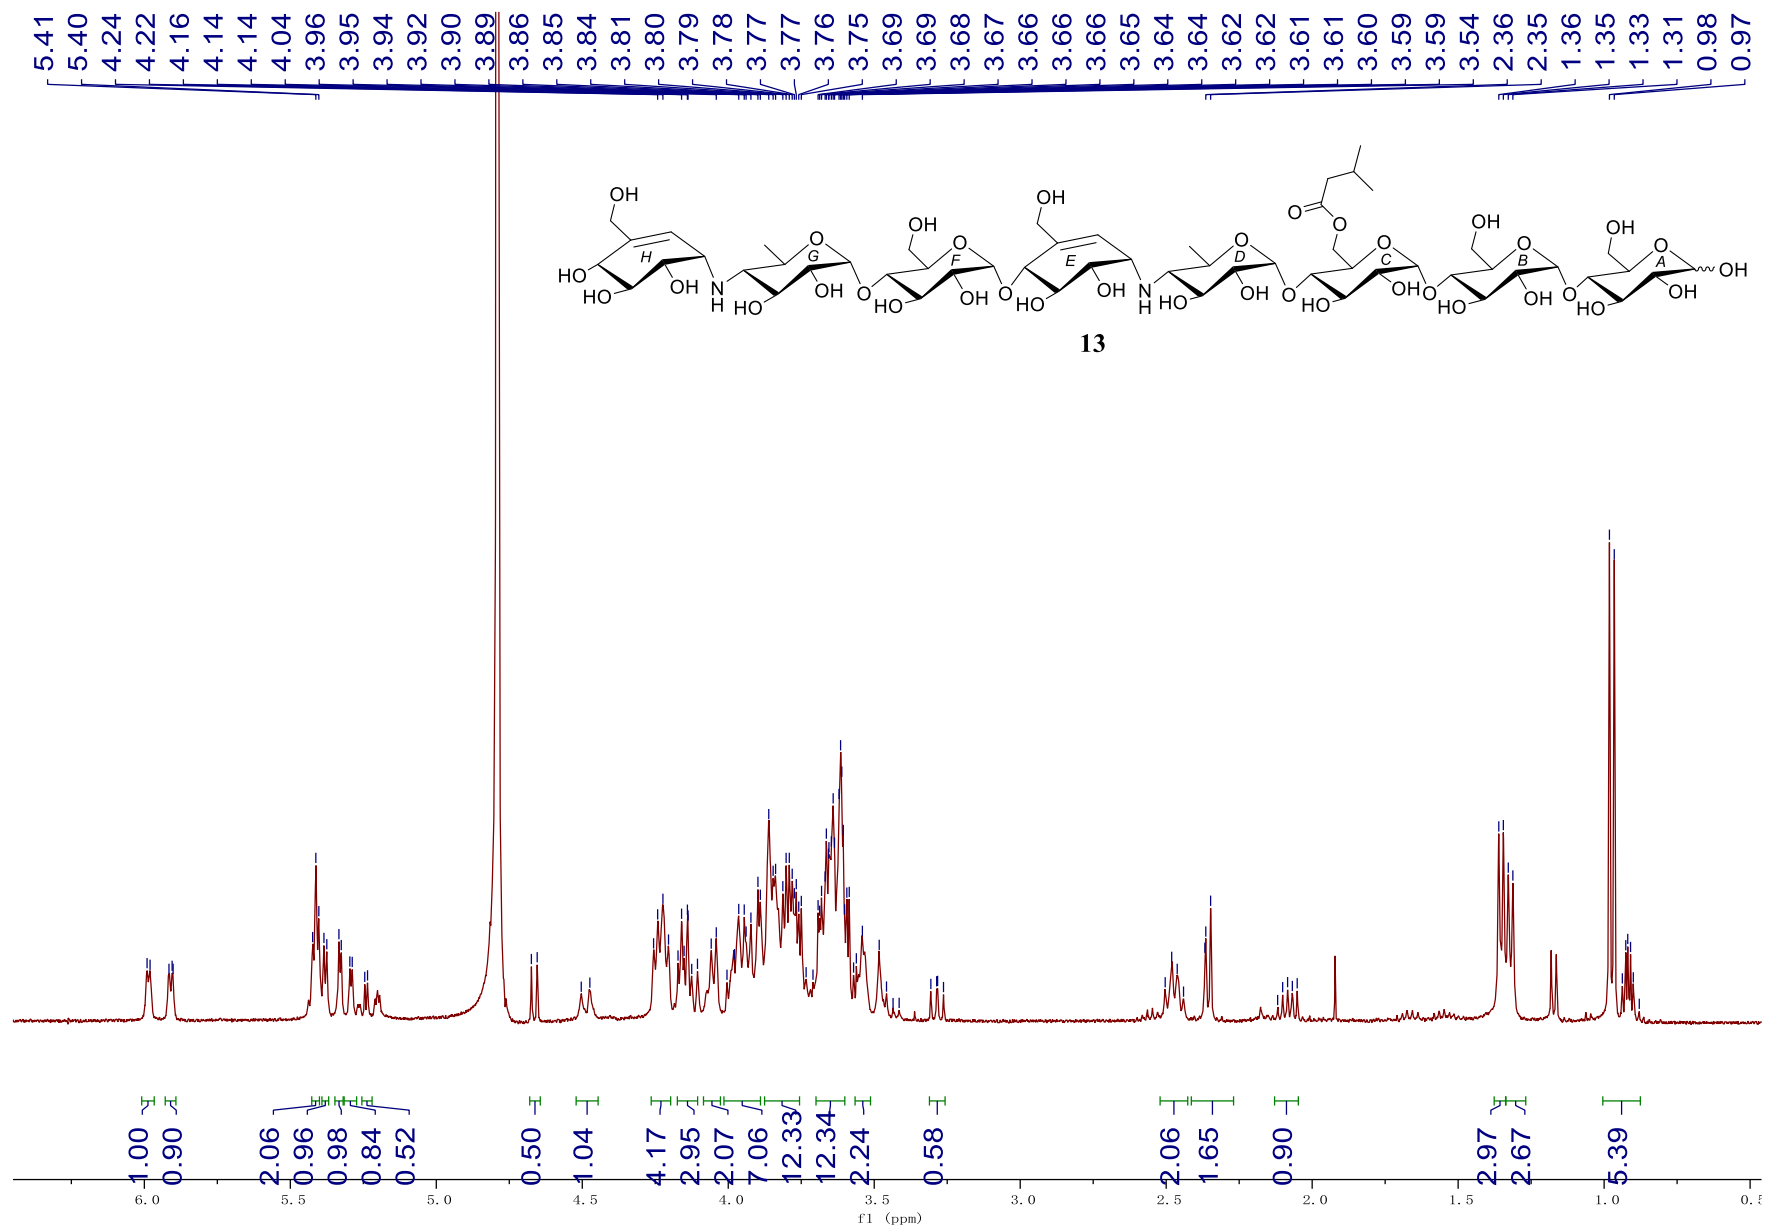

**Figure S71.**  $^1\text{H}$  NMR spectrum of compound **13** (500 MHz,  $\text{D}_2\text{O}$ ).

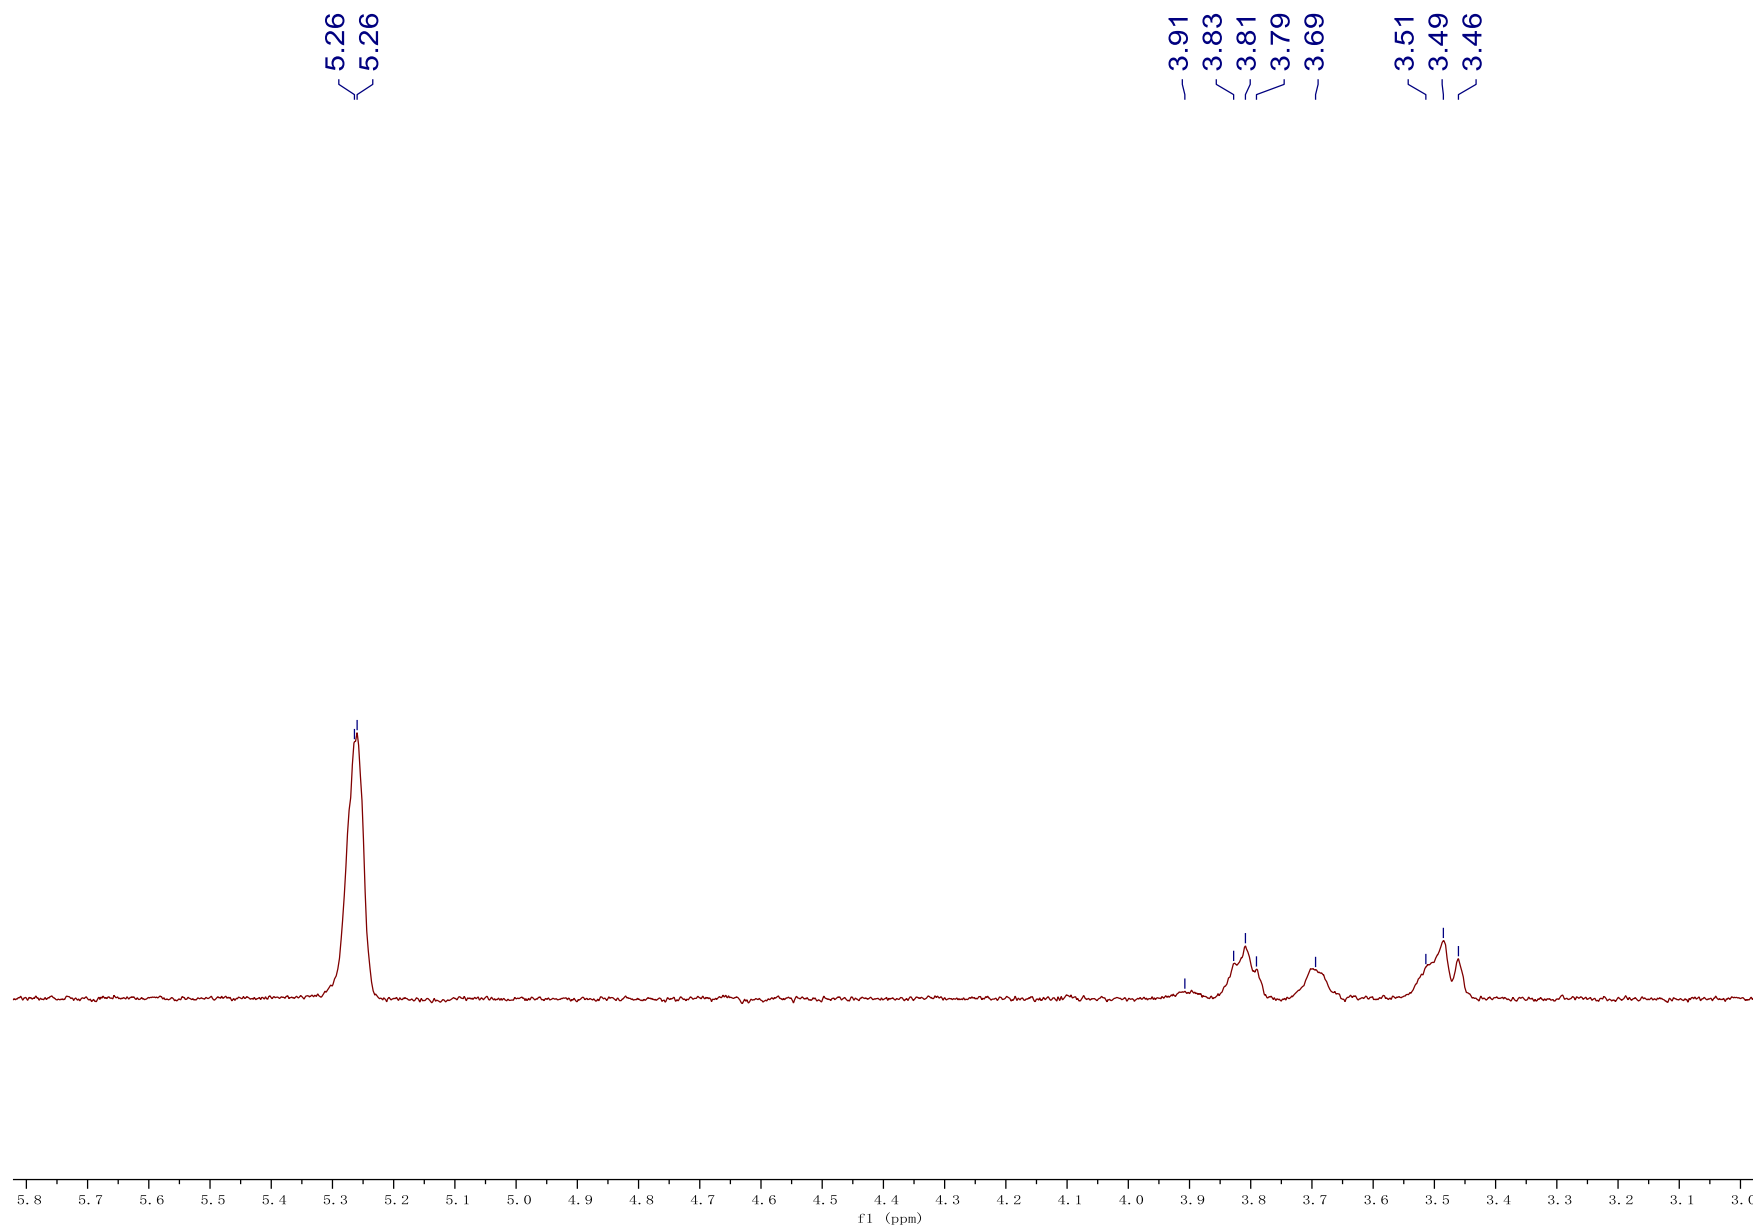

**Figure S72.** 1D-selective TOCSY spectrum of compound **13** (500 MHz, D<sub>2</sub>O, excitation at  $\delta$  5.24, H-A1 $\alpha$ ).

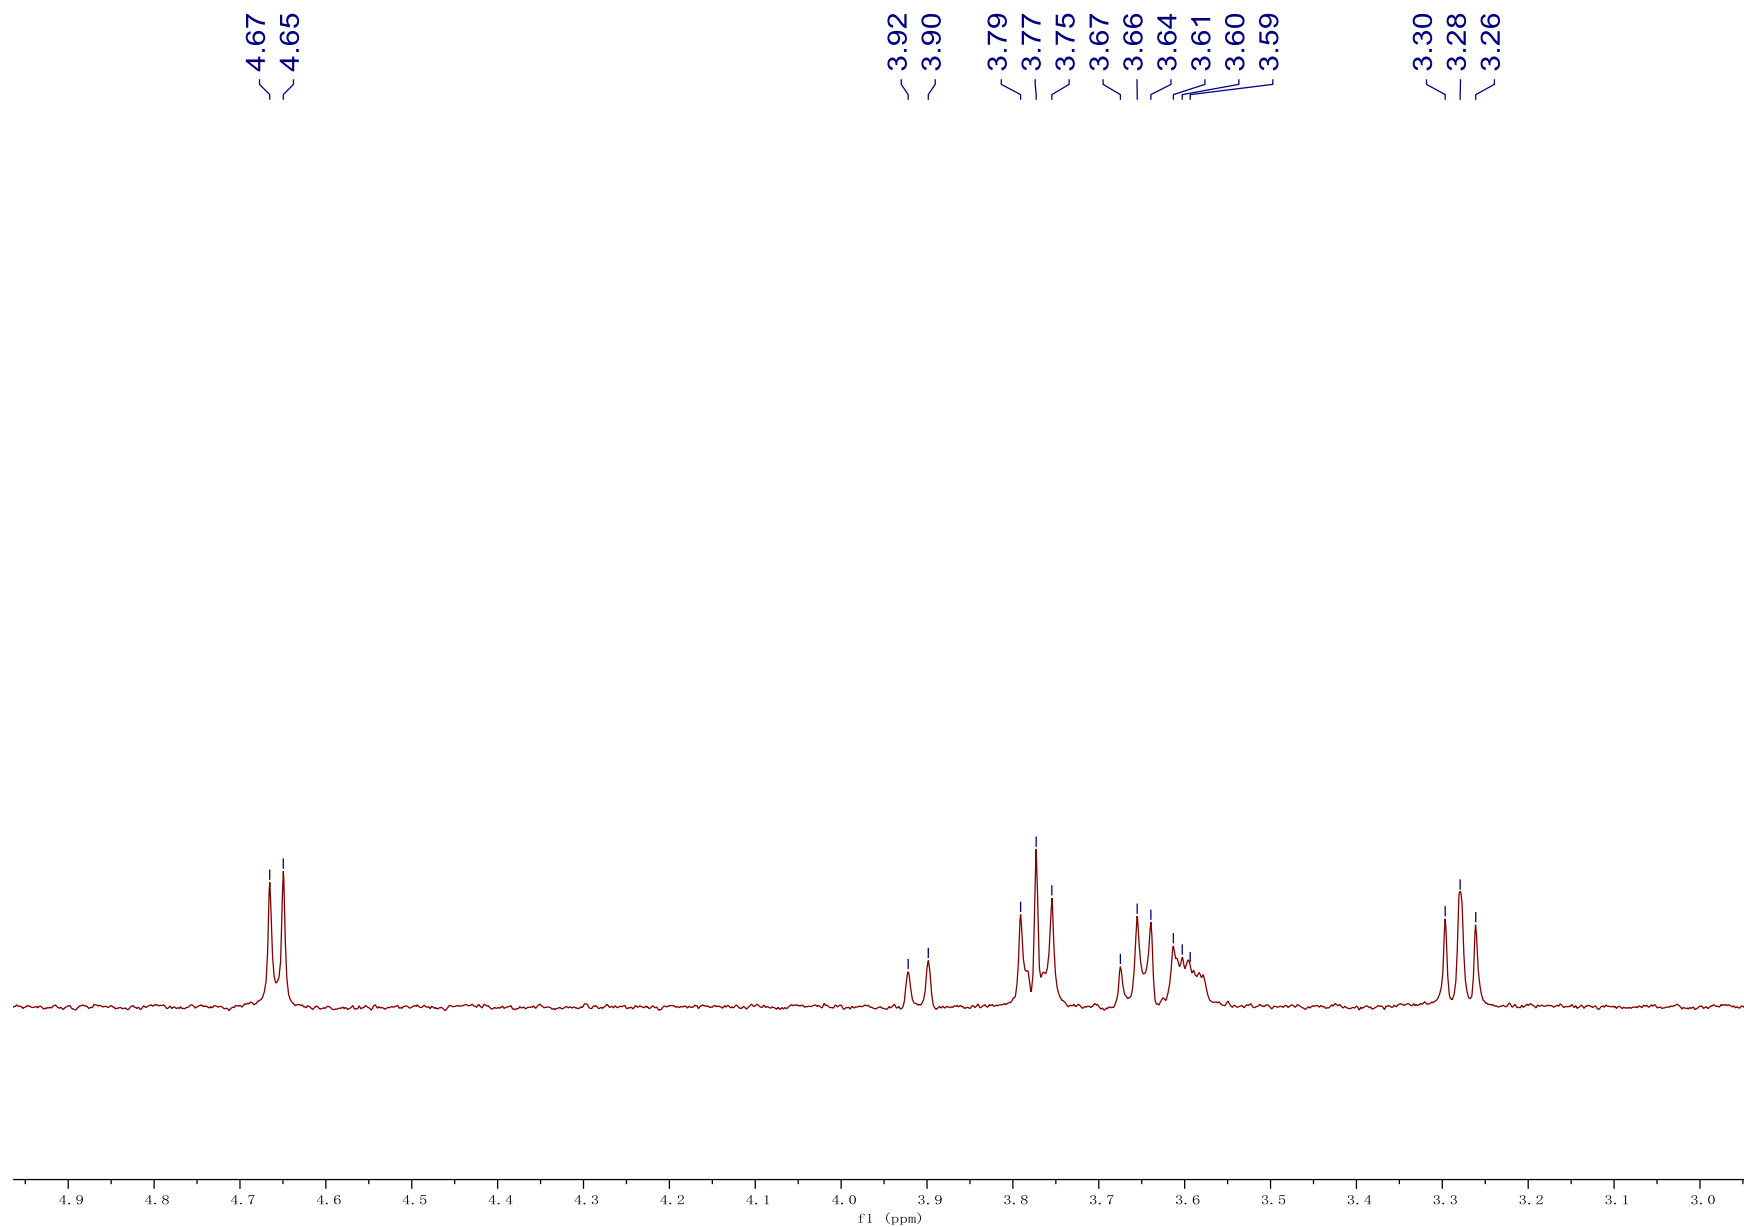

**Figure S73.** 1D-selective TOCSY spectrum of compound **13** (500 MHz, D<sub>2</sub>O, excitation at  $\delta$  4.66, H-A1 $\beta$ ).

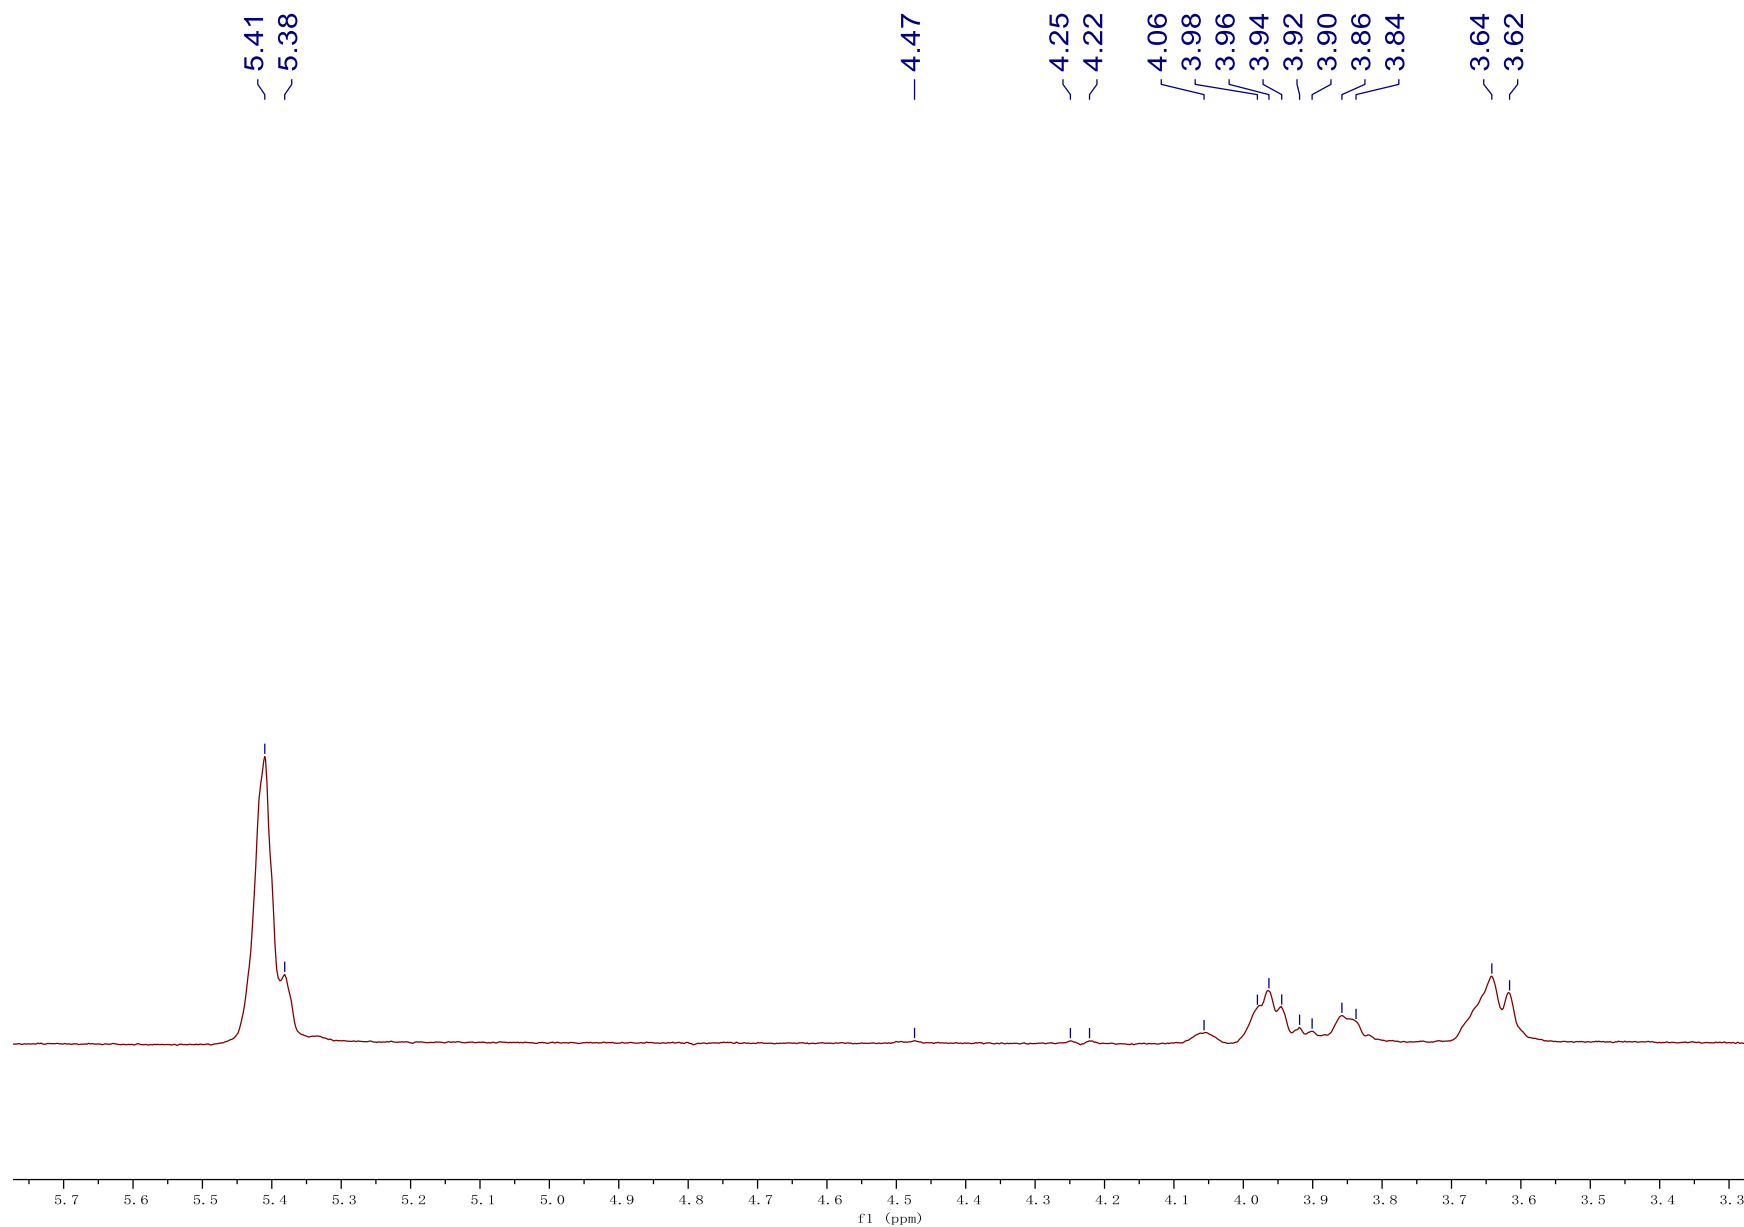

**Figure S74.** 1D-selective TOCSY spectrum of compound **13** (500 MHz, D<sub>2</sub>O, excitation at  $\delta$  5.41, H-**B1** and H-**C1**).



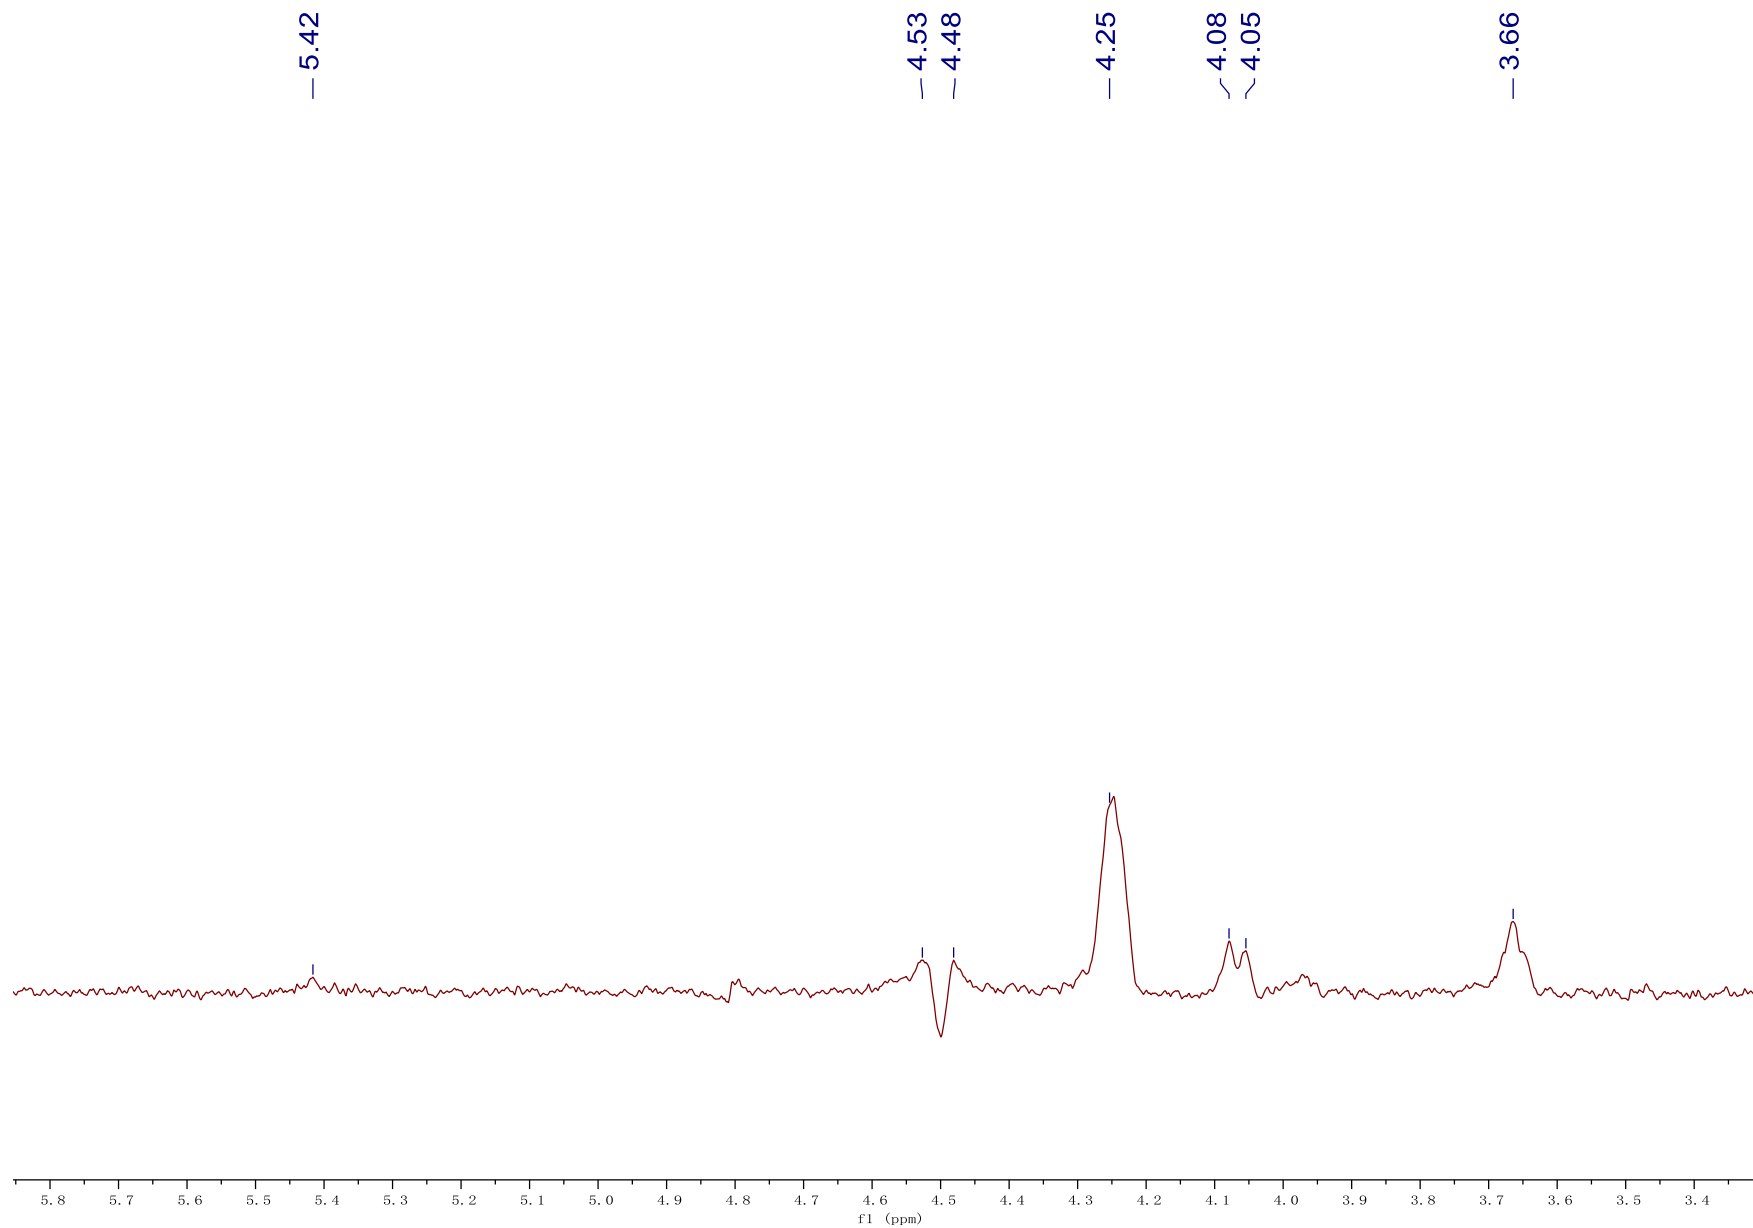

**Figure S75.** 1D-selective TOCSY spectrum of compound **13** (500 MHz, D<sub>2</sub>O, excitation at  $\delta$  4.49, H-C6).

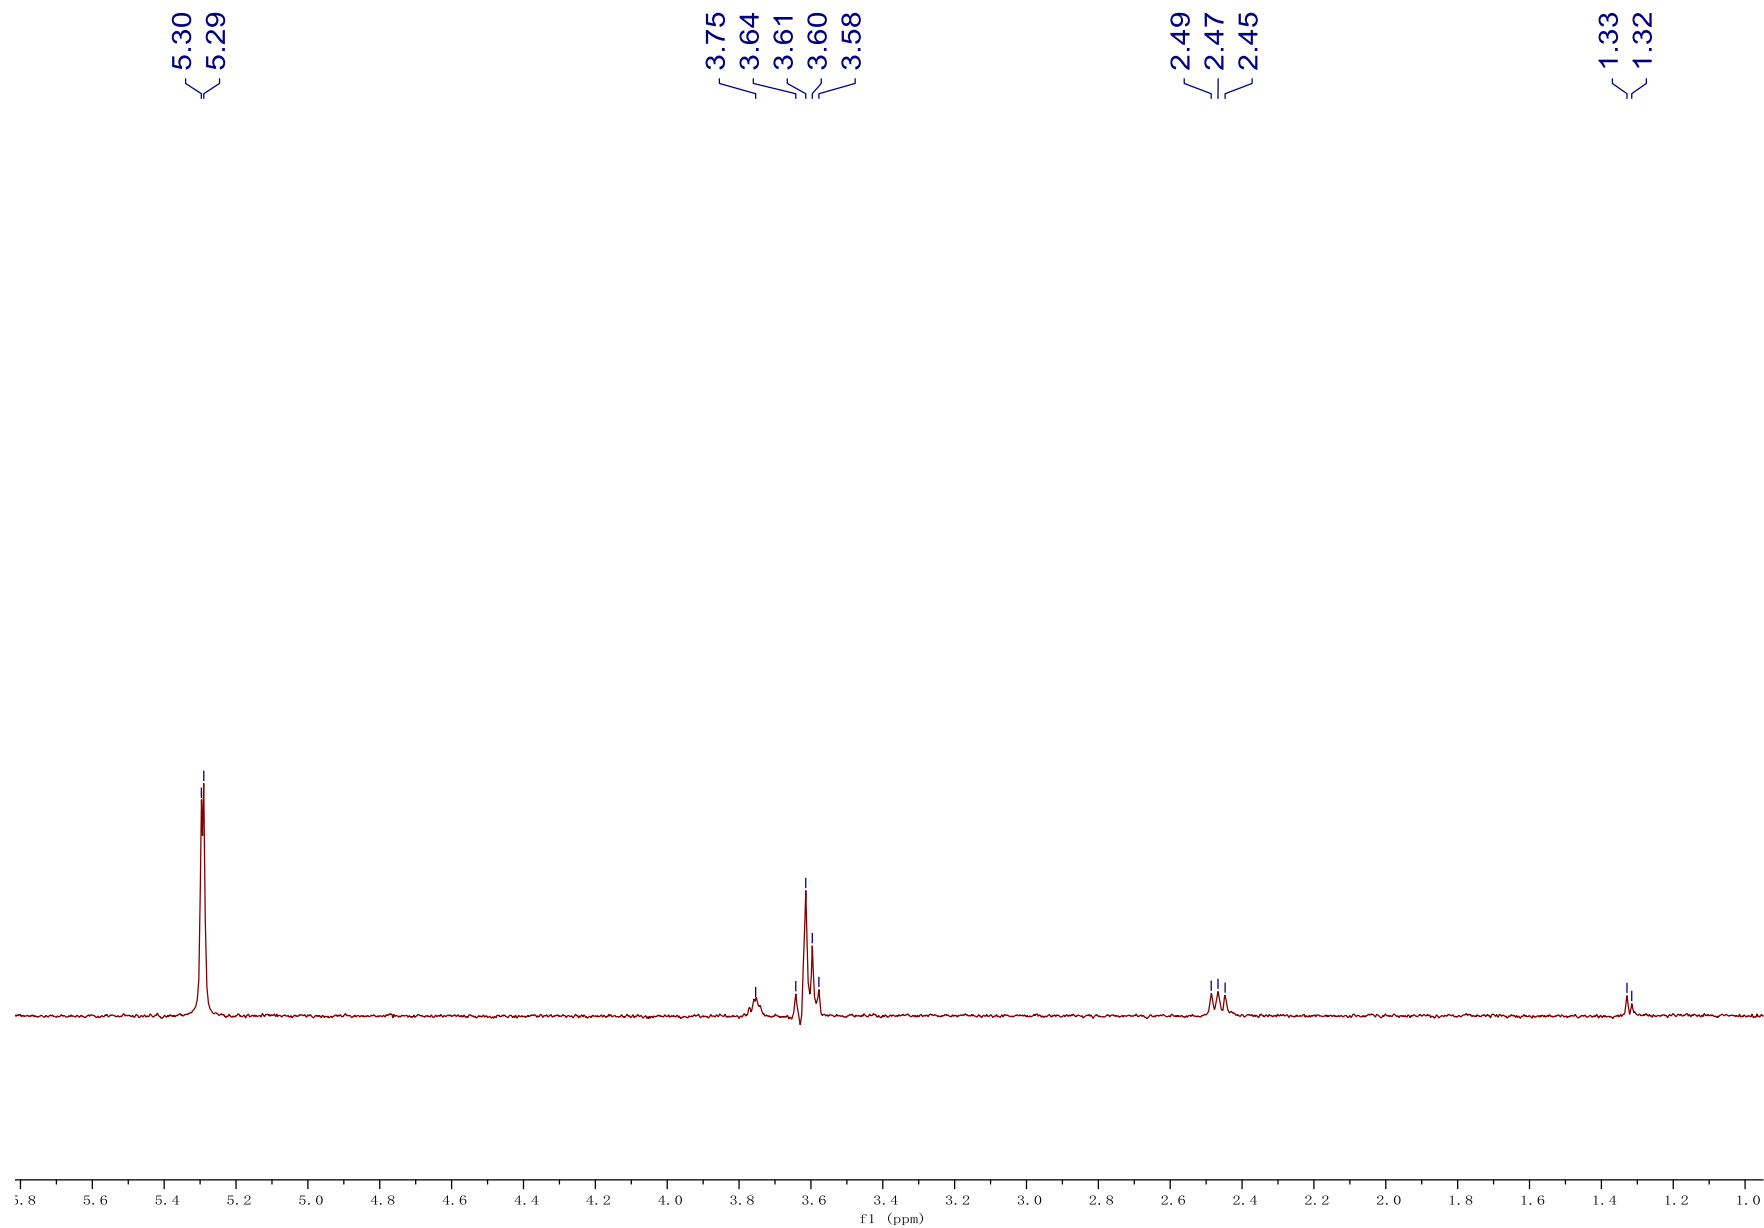

**Figure S76.** 1D-selective TOCSY spectrum of compound **13** (500 MHz, D<sub>2</sub>O, excitation at  $\delta$  5.29, H-**D1**).

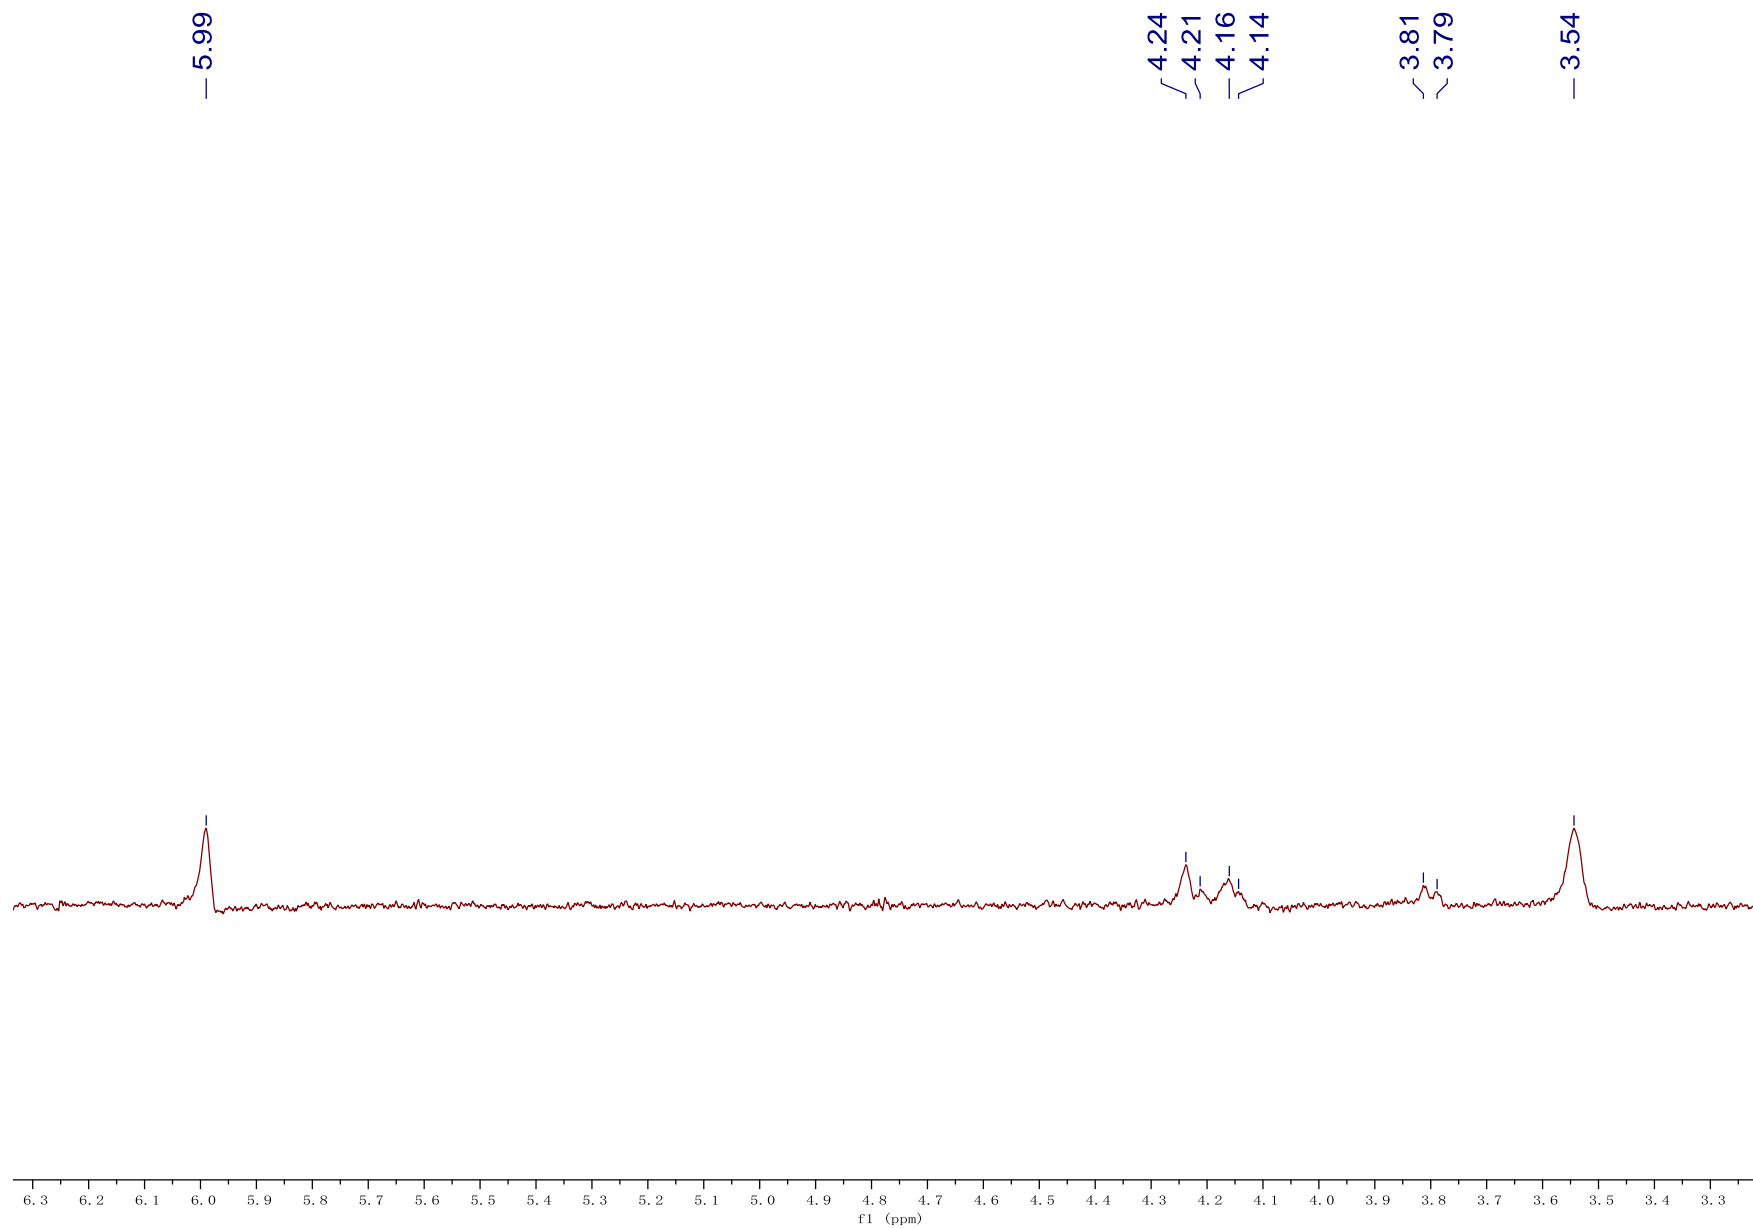

**Figure S77.** 1D-selective TOCSY spectrum of compound **13** (500 MHz, D<sub>2</sub>O, excitation at  $\delta$  5.99, H-E7).

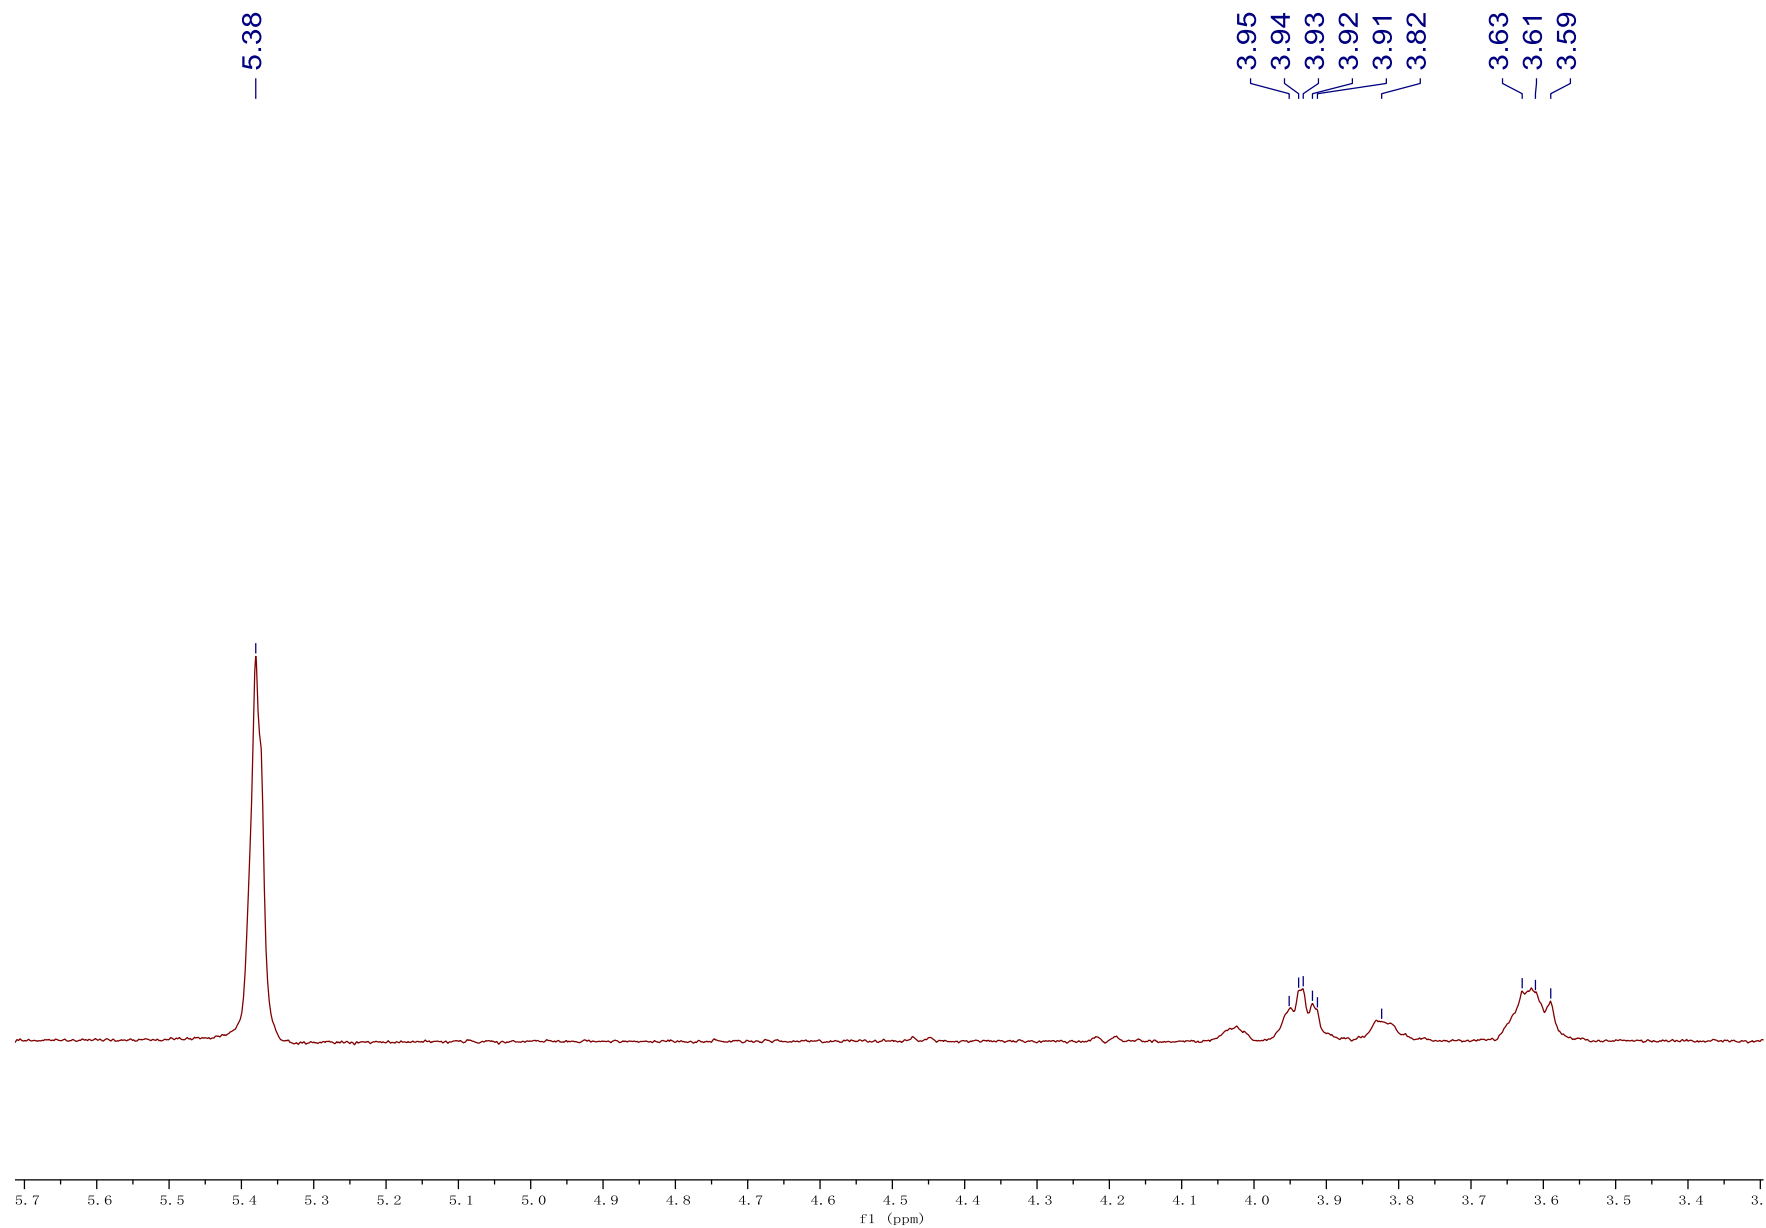

**Figure S78.** 1D-selective TOCSY spectrum of compound **13** (500 MHz, D<sub>2</sub>O, excitation at  $\delta$  5.38, H-F1).

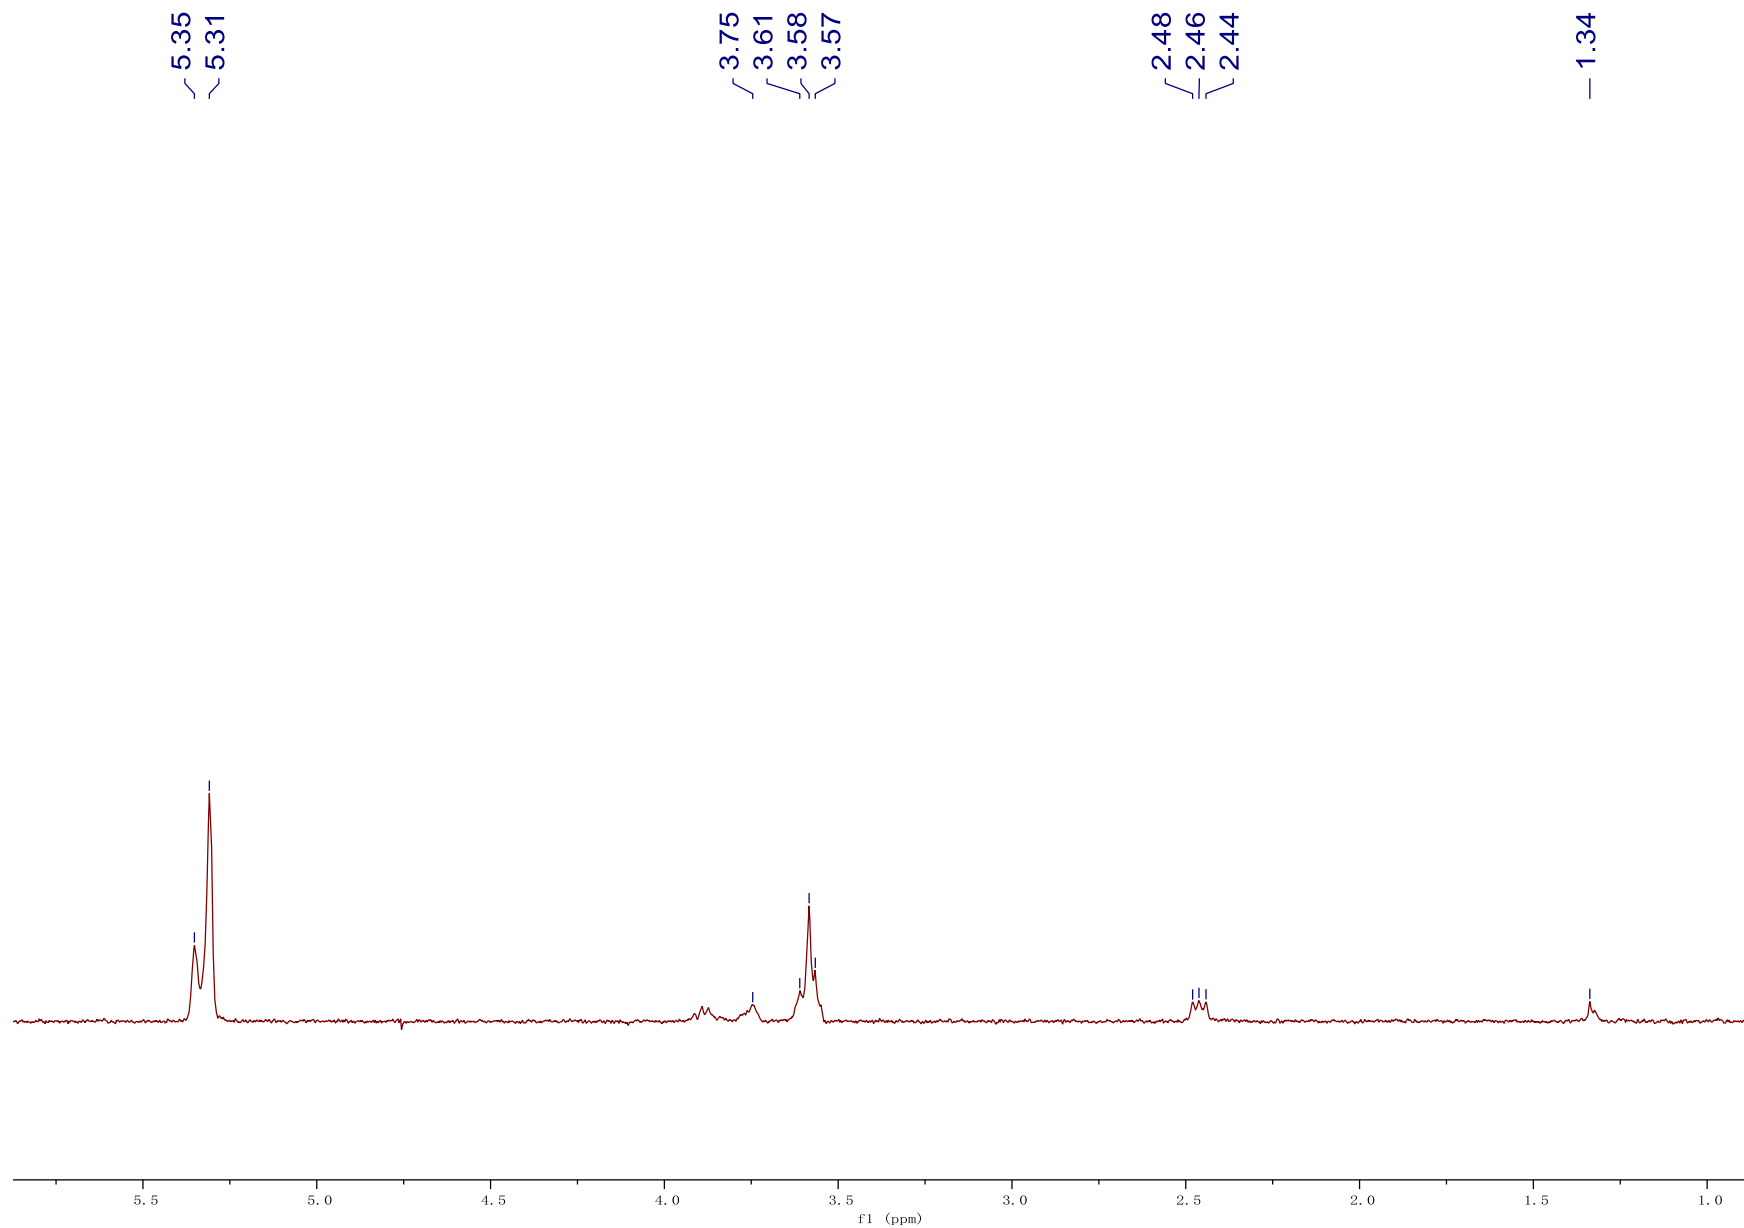

**Figure S79.** 1D-selective TOCSY spectrum of compound **13** (500 MHz, D<sub>2</sub>O, excitation at  $\delta$  5.33, H-**G1**).

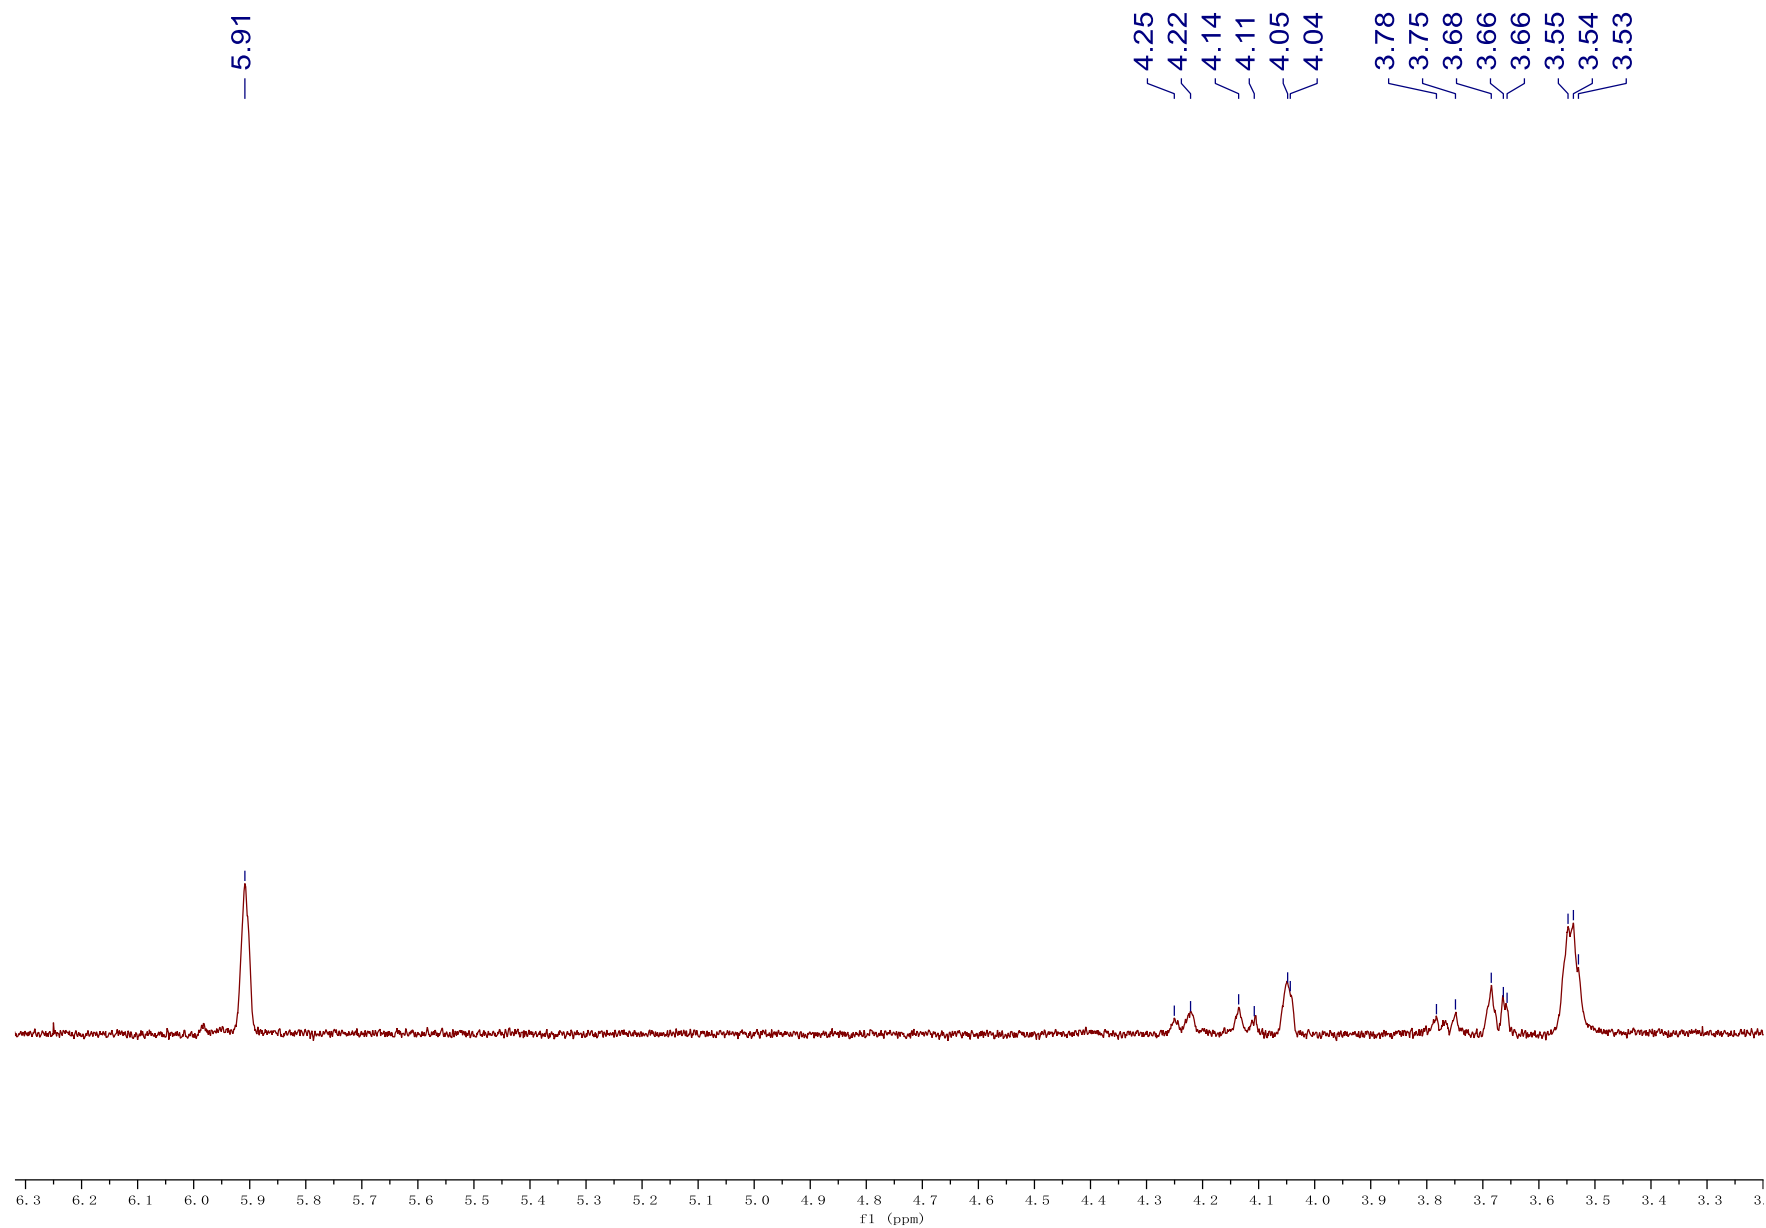

**Figure S80.** 1D-selective TOCSY spectrum of compound **13** (500 MHz, D<sub>2</sub>O, excitation at  $\delta$  5.91, H-**H7**).

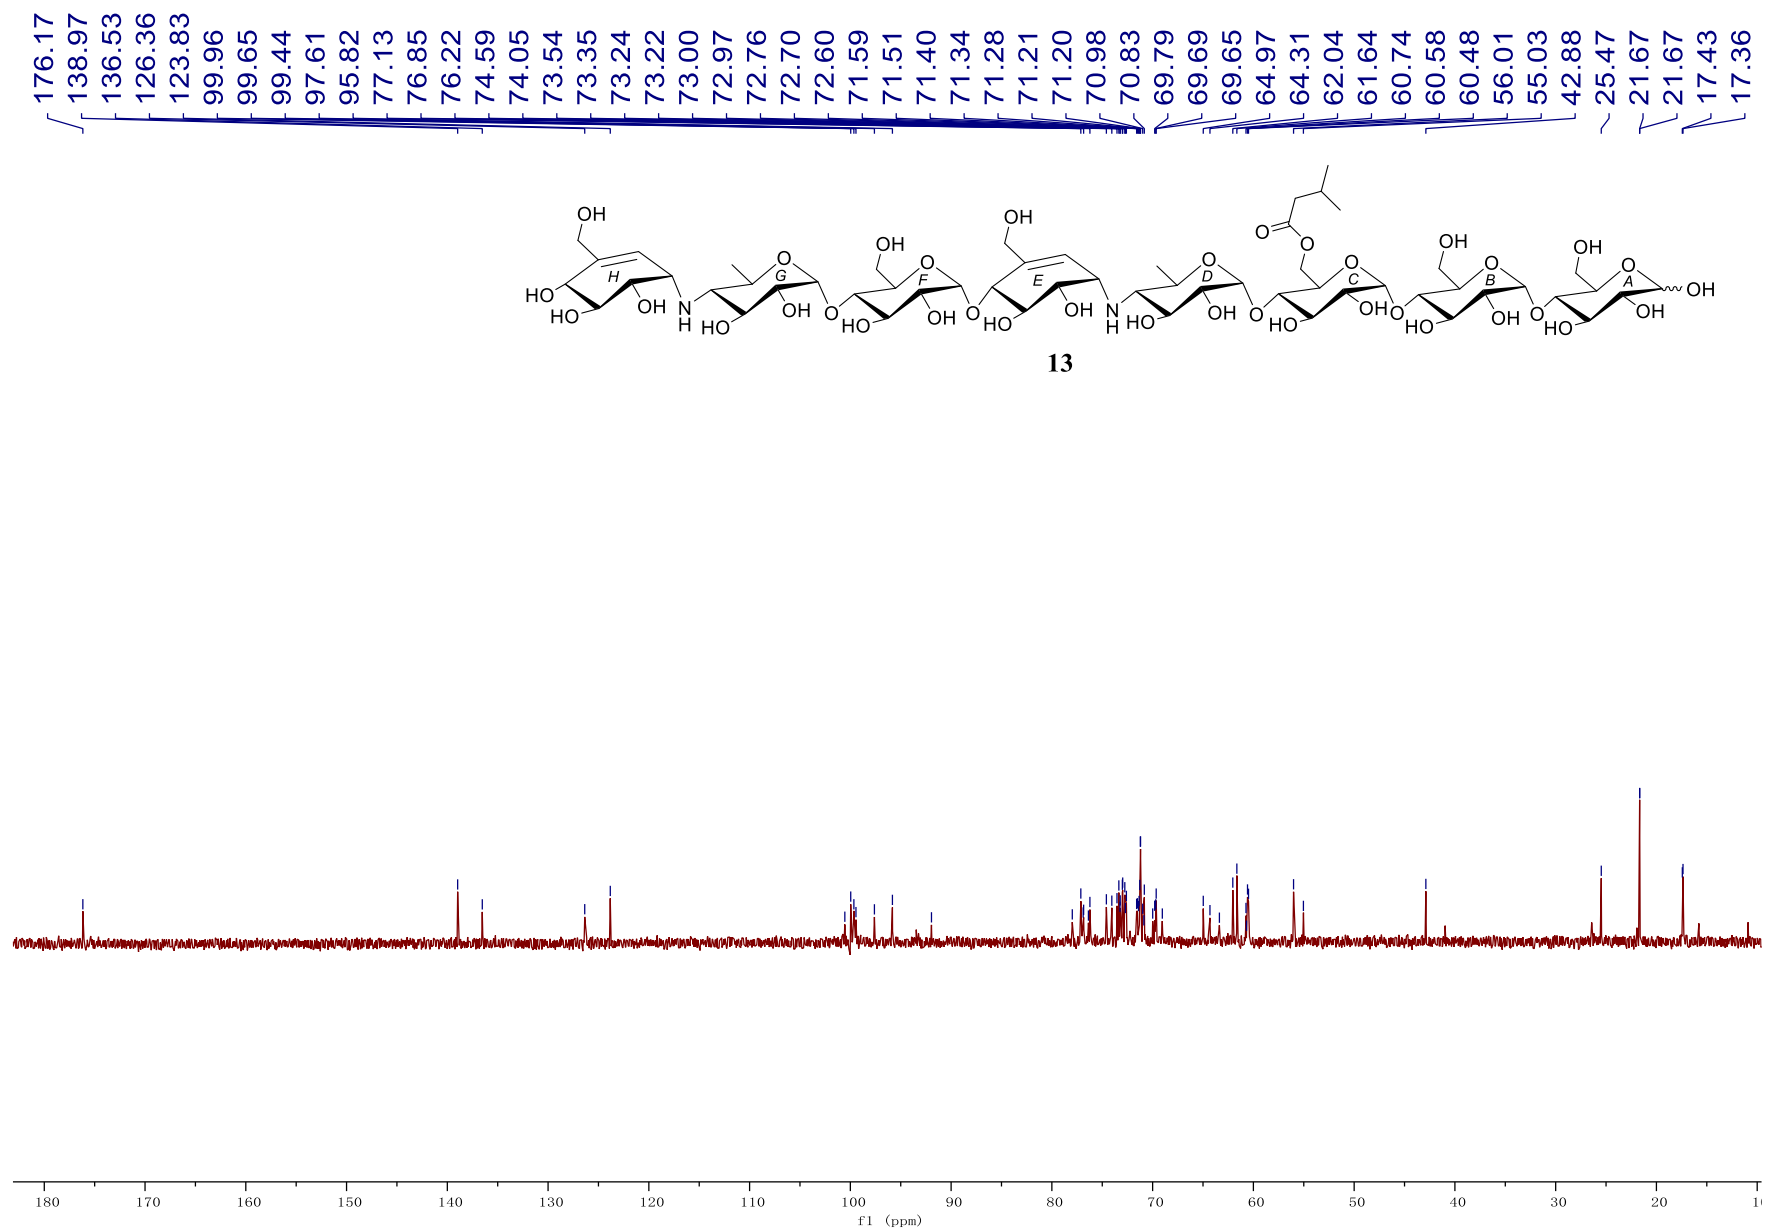

**Figure S81.**  $^{13}\text{C}$  NMR spectrum of compound **13** (125 MHz,  $\text{D}_2\text{O}$ ).

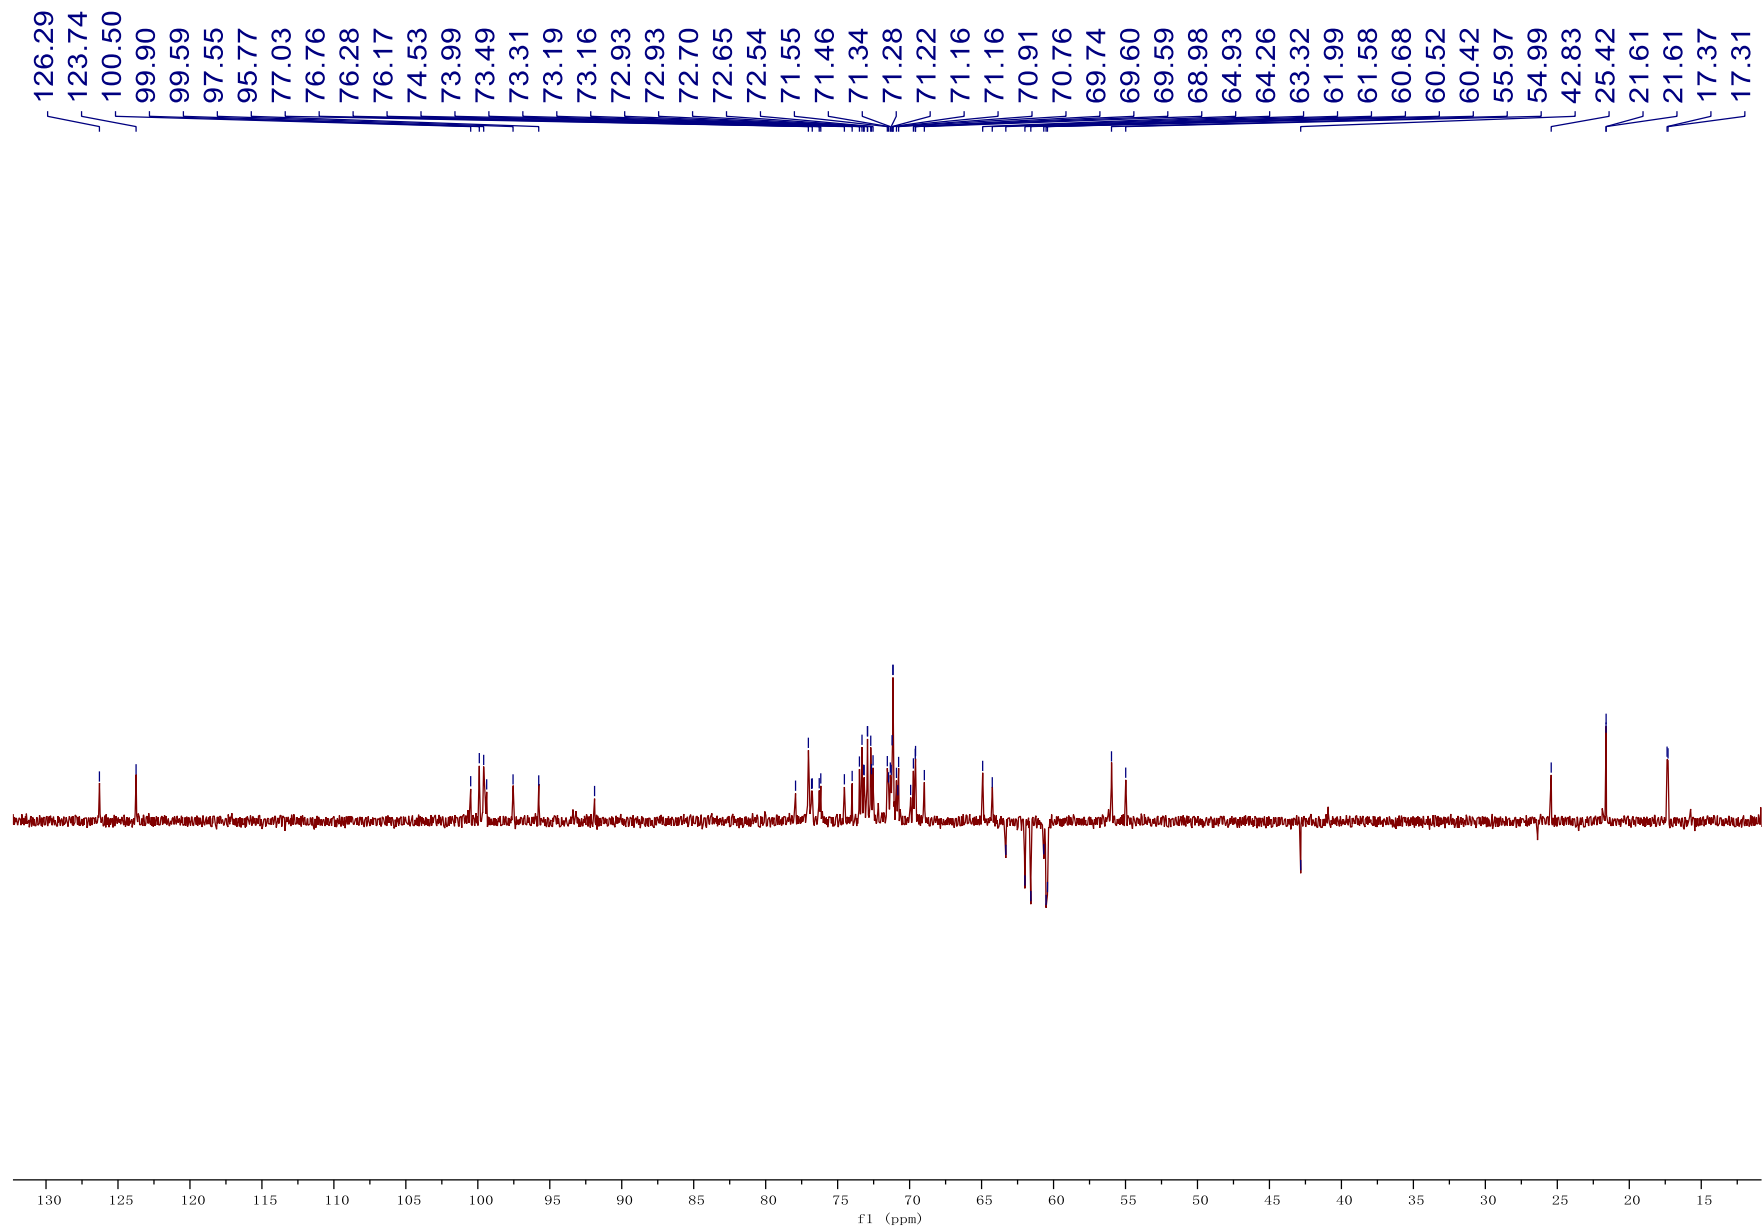

**Figure S82.** DEPT-135 spectrum of compound **13** (125 MHz, D<sub>2</sub>O).



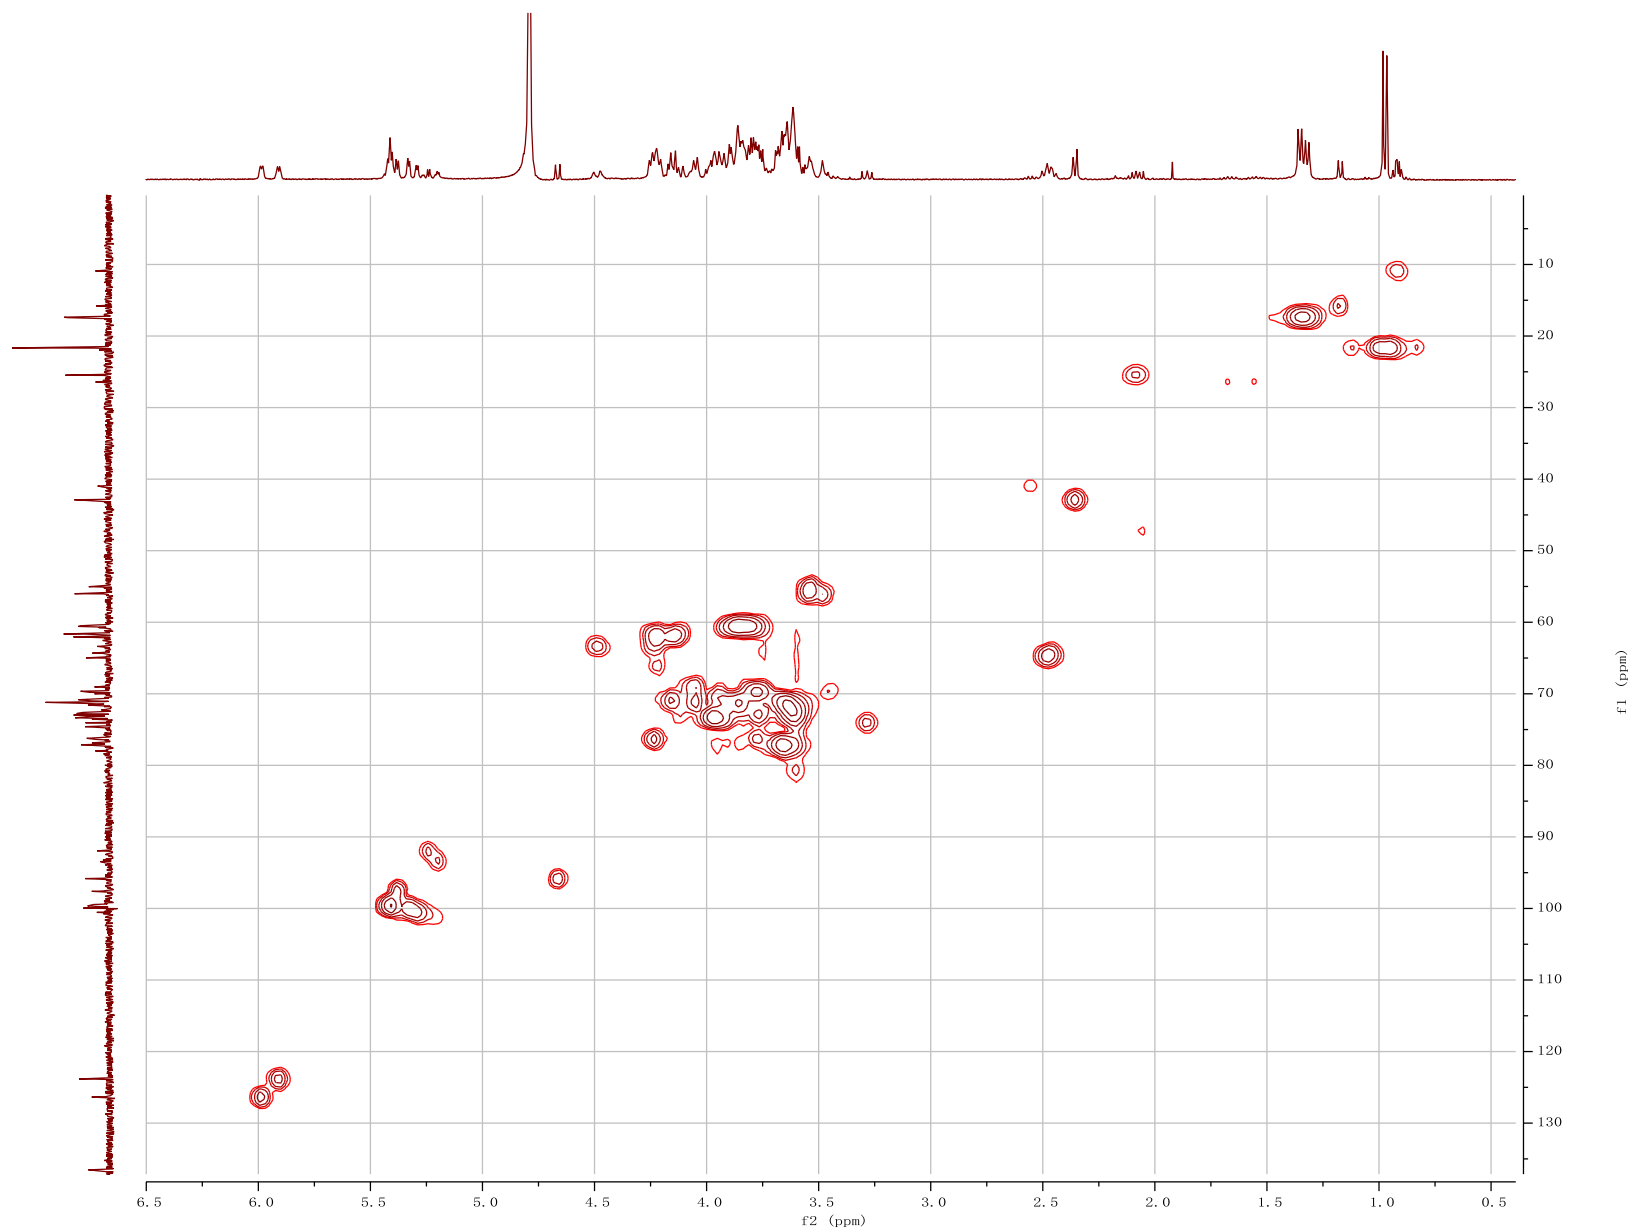

**Figure S83.** HSQC spectrum of compound **13** (500 MHz, D<sub>2</sub>O).

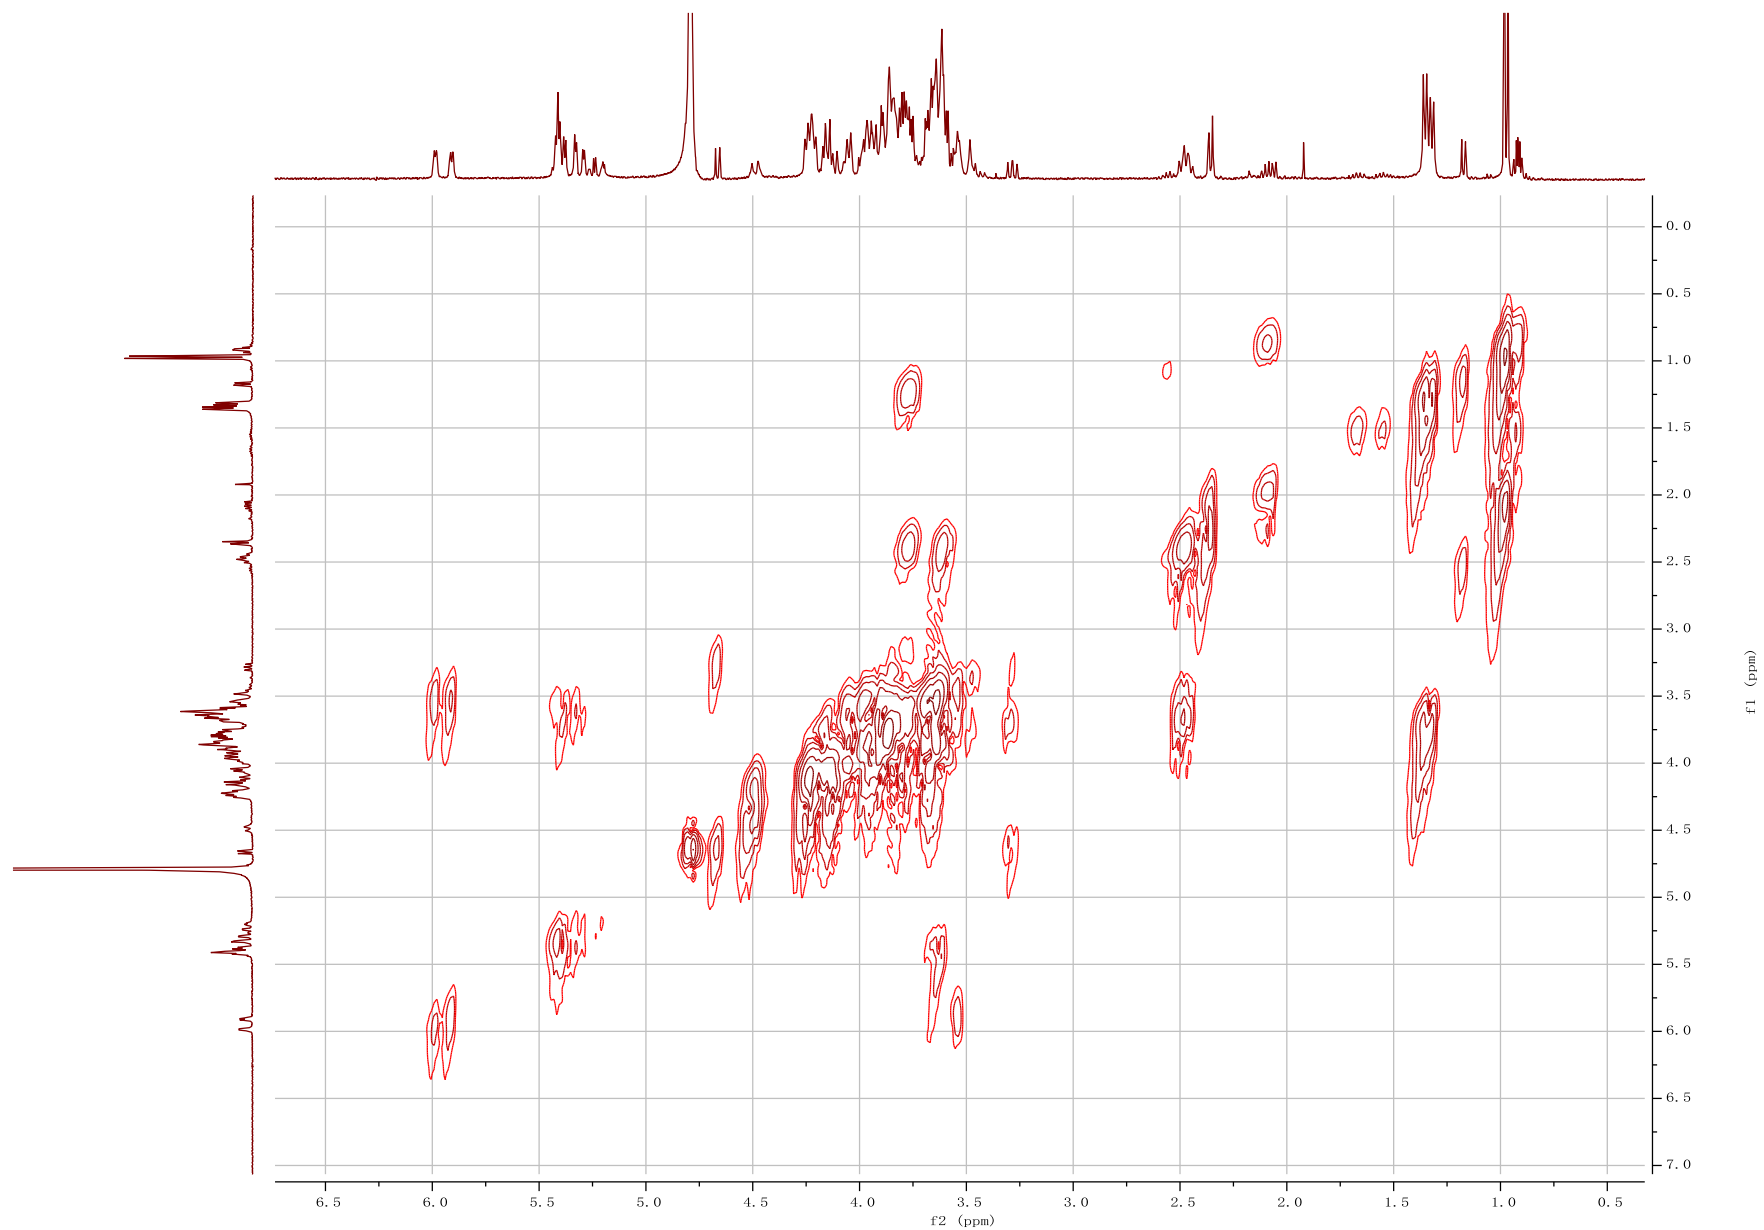

**Figure S84.**  $^1\text{H}$ - $^1\text{H}$  COSY spectrum of compound **13** (500 MHz,  $\text{D}_2\text{O}$ ).

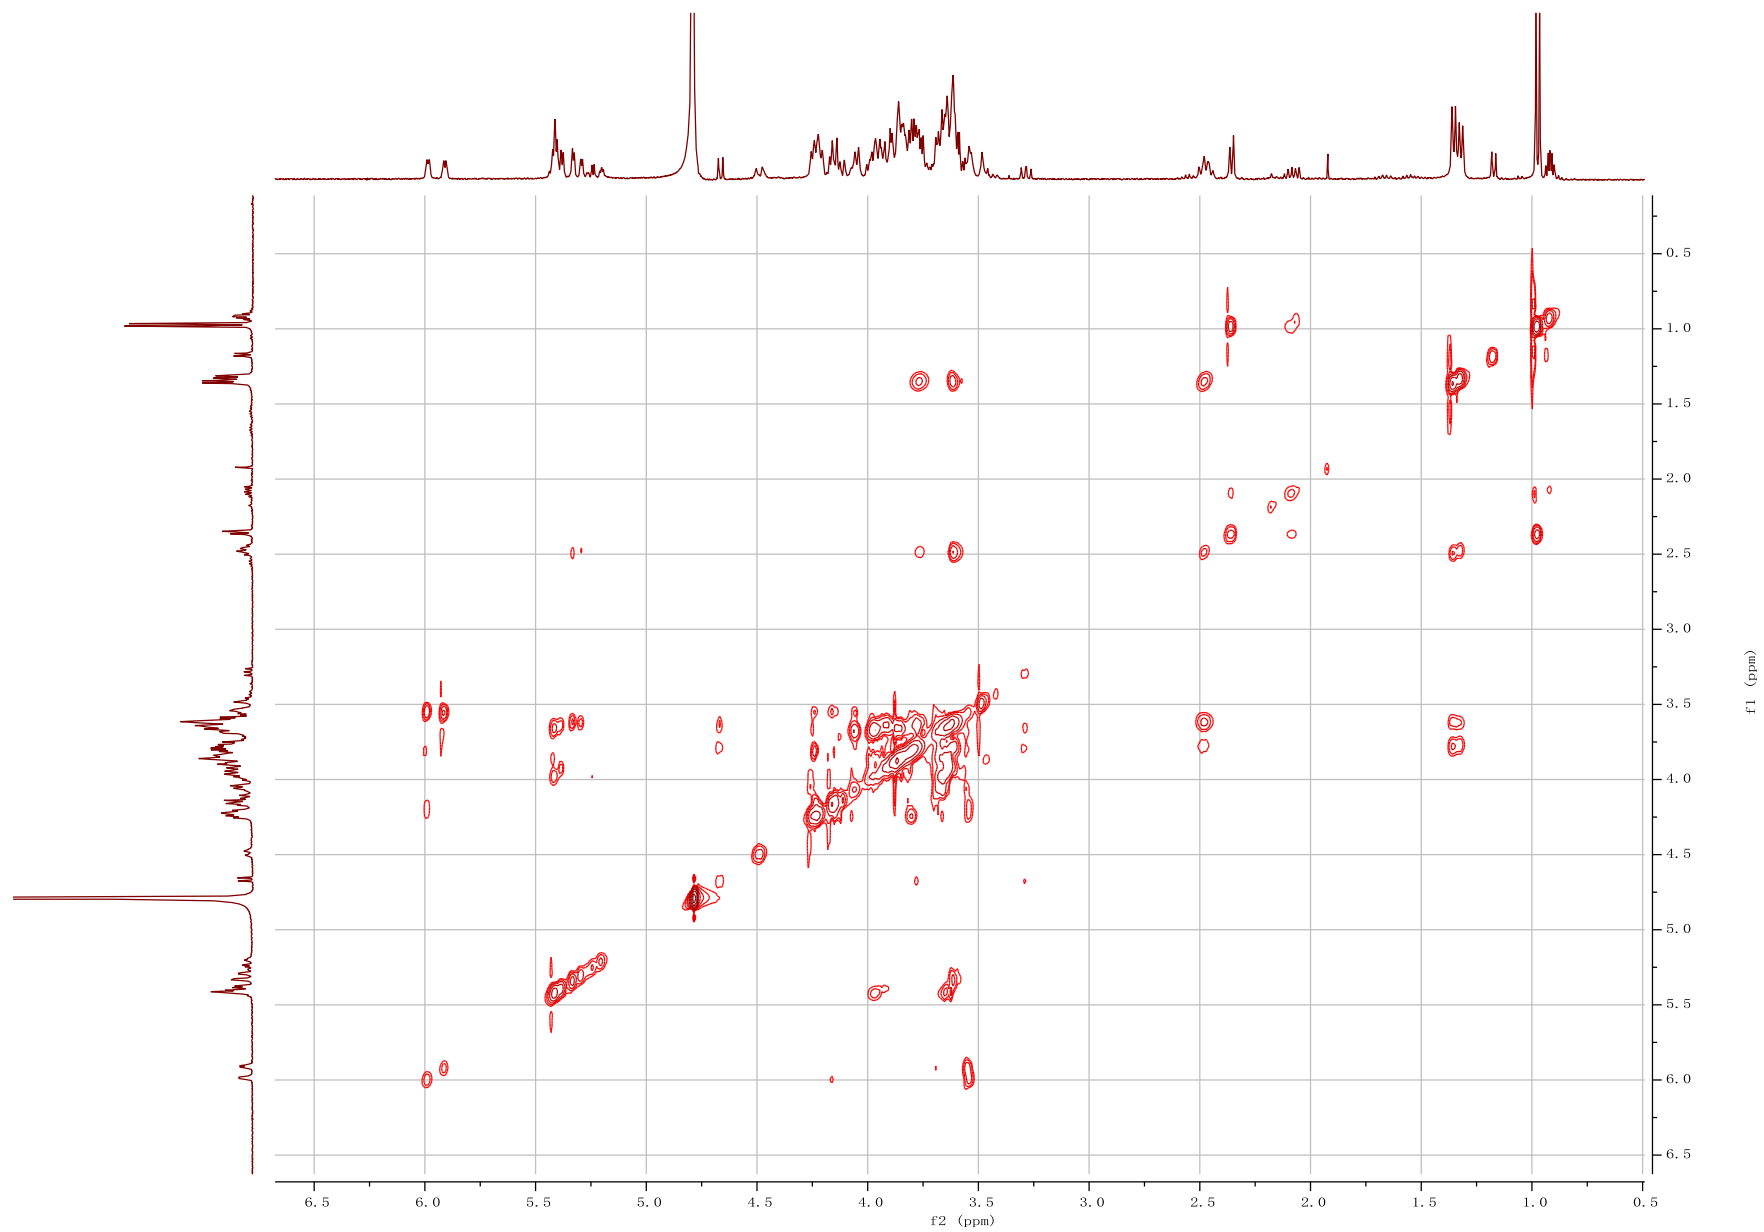

**Figure S85.** 2D-TOCSY spectrum of compound **13** (500 MHz, D<sub>2</sub>O).

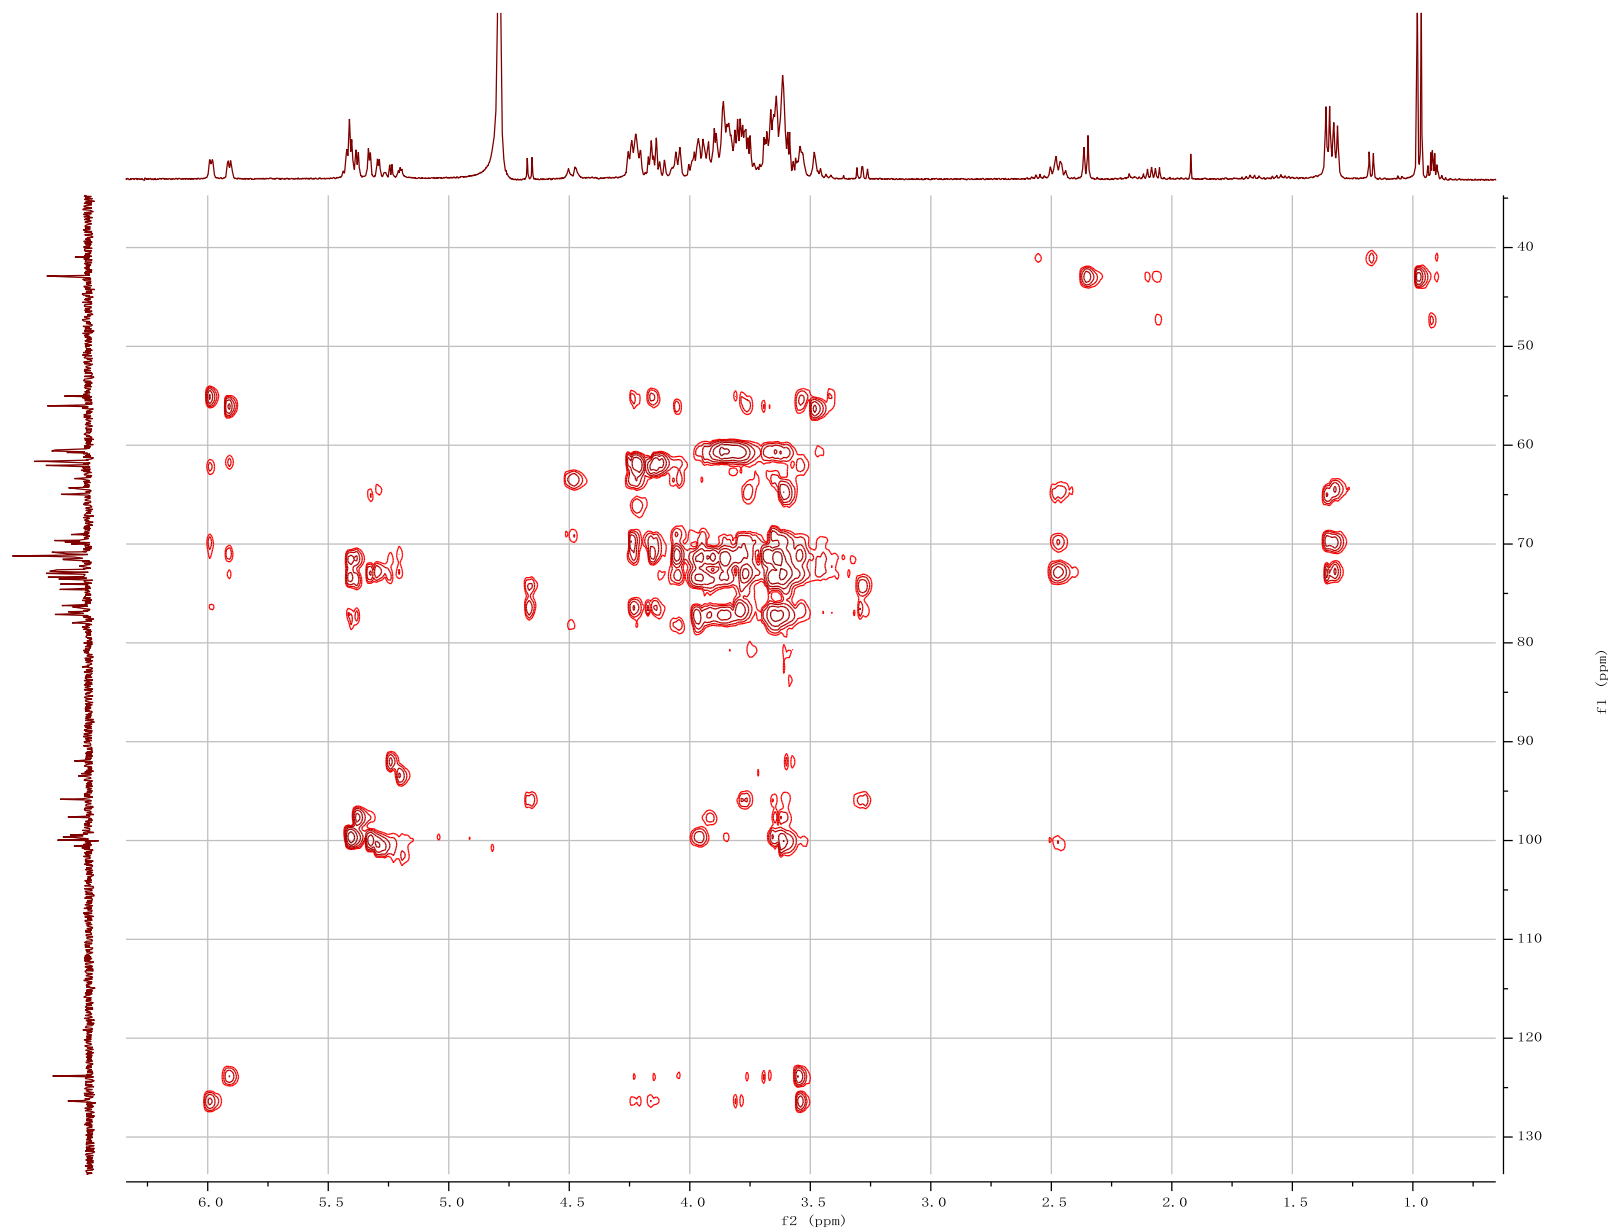

**Figure S86.** HSQC-TOCSY spectrum of compound **13** (500 MHz,  $\text{D}_2\text{O}$ ).

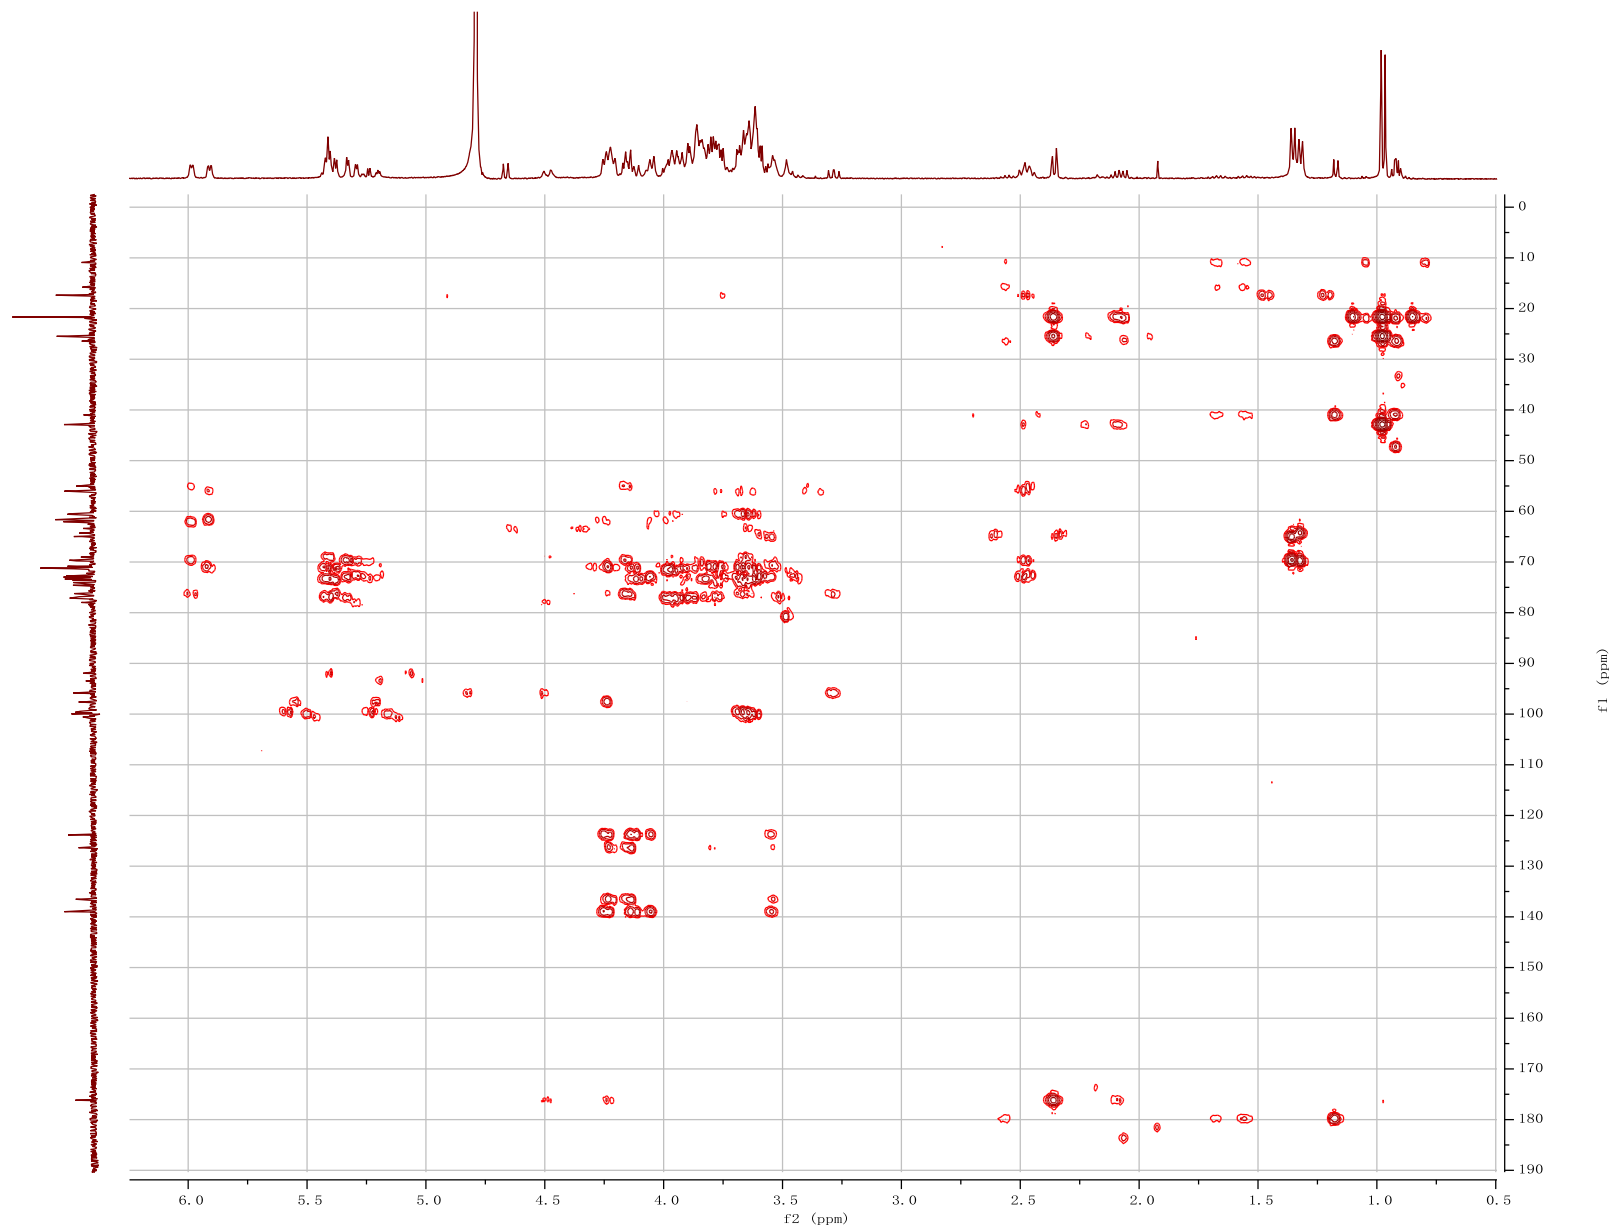

**Figure S87.** HMBC spectrum of compound **13** (500 MHz, D<sub>2</sub>O).

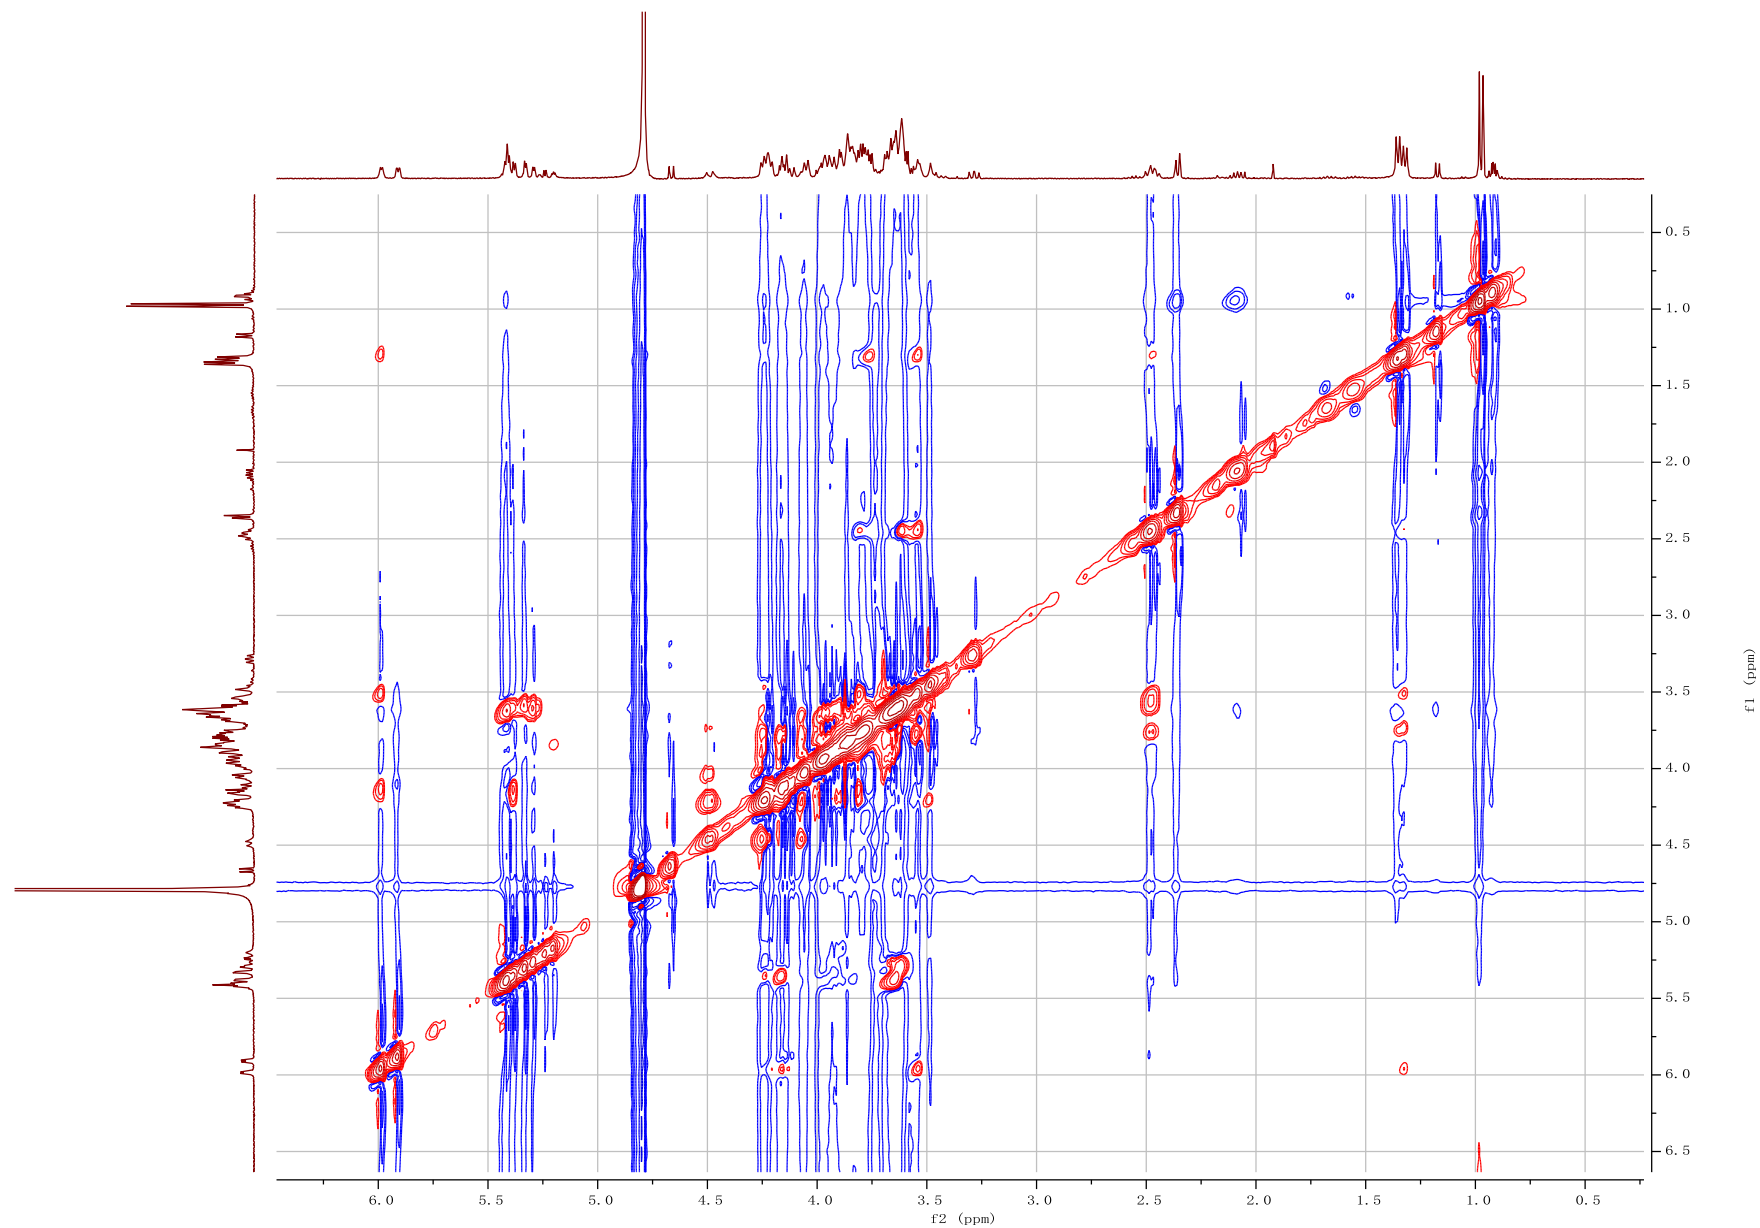

**Figure S88.** NOESY spectrum of compound **13** (500 MHz, D<sub>2</sub>O).

H\_40a #3804 RT: 12.74 AV: 1 NL: 5.41E4  
T: FTMS + p ESI d Full ms2 1277.0270@hcd25

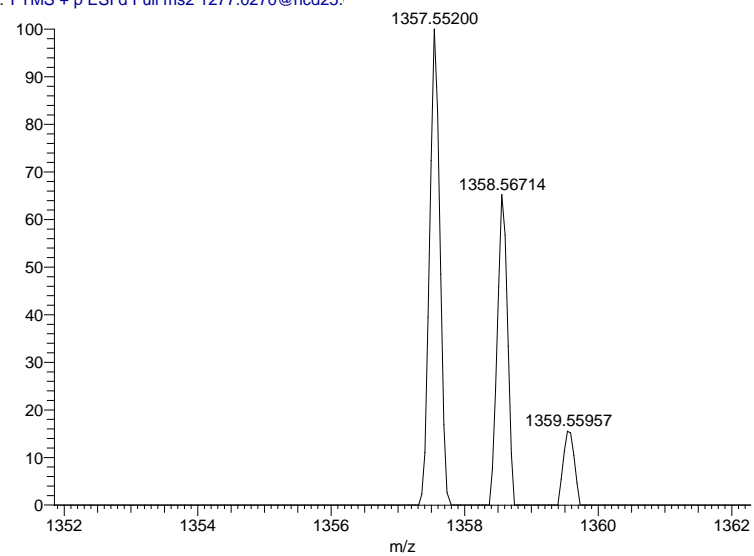

**Figure S89.** HRESIMS spectrum of compound **13**.

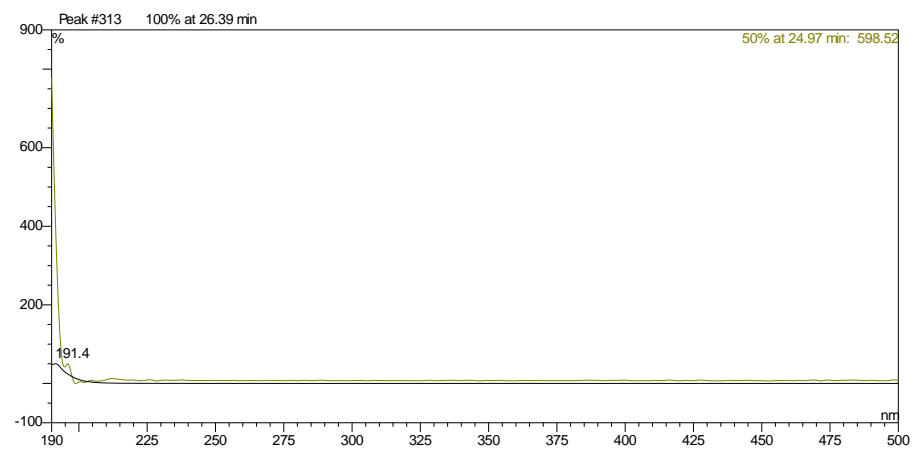

**Figure S90.** UV spectrum of compound **13**.

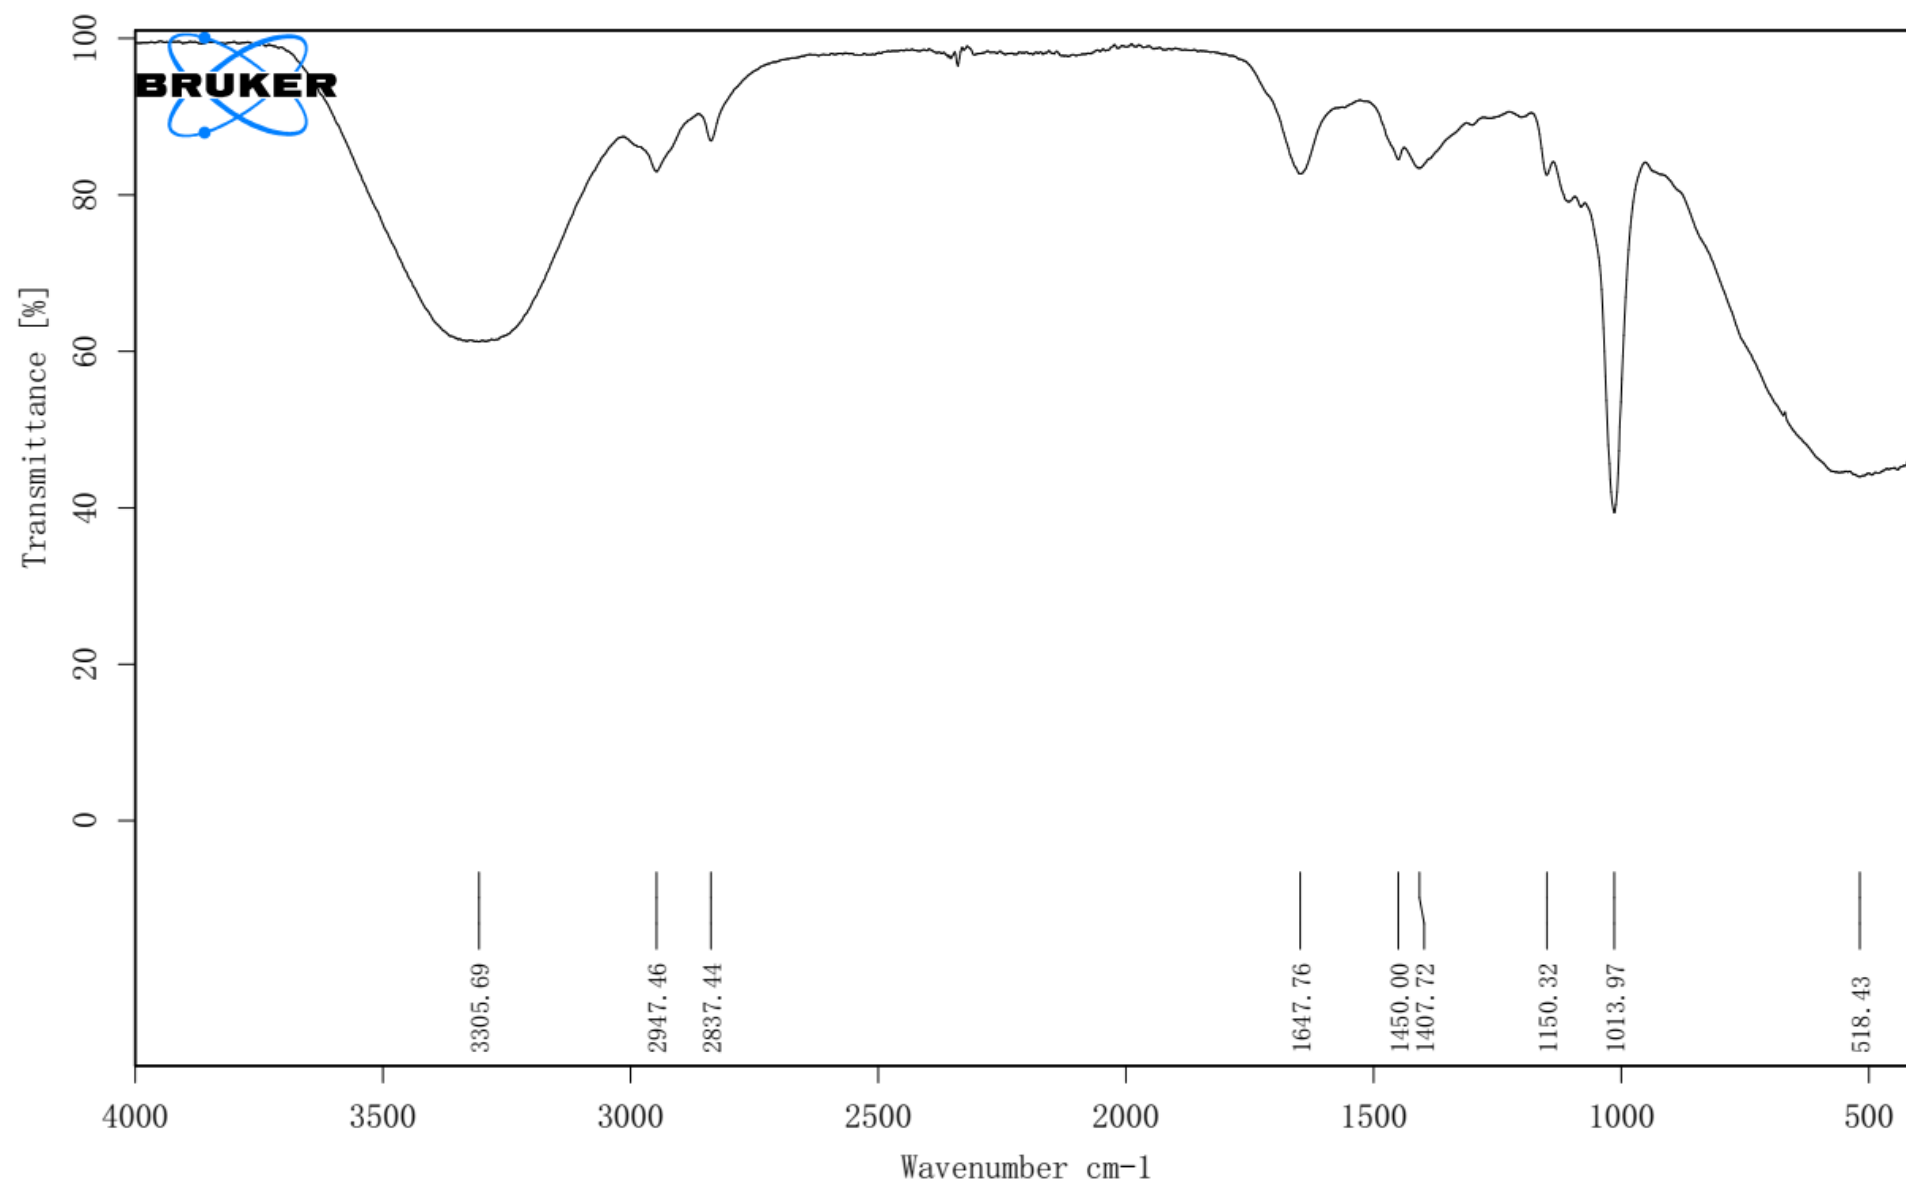

**Figure S91.** IR spectrum of compound **13**.



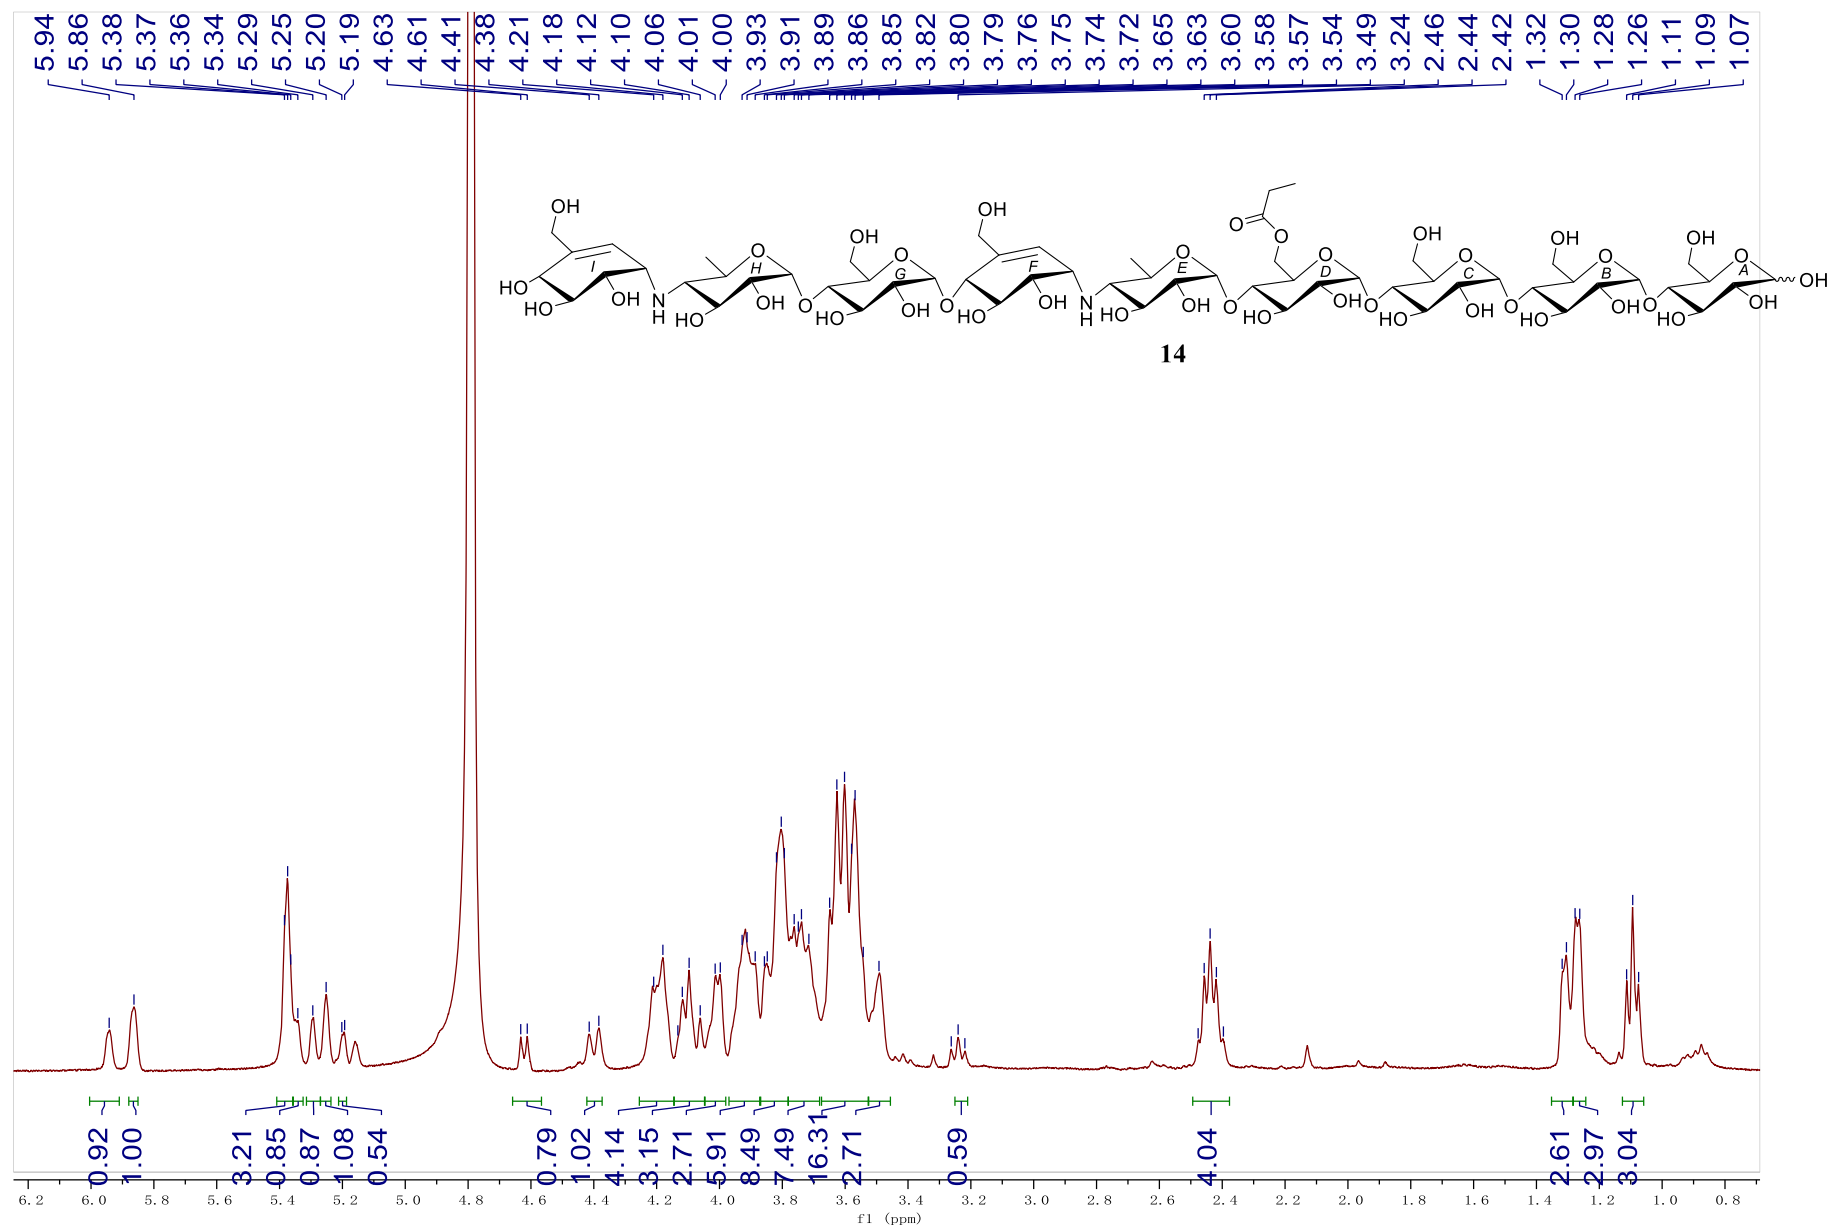

**Figure S92.**  $^1\text{H}$  NMR spectrum of compound **14** (500 MHz,  $\text{D}_2\text{O}$ ).

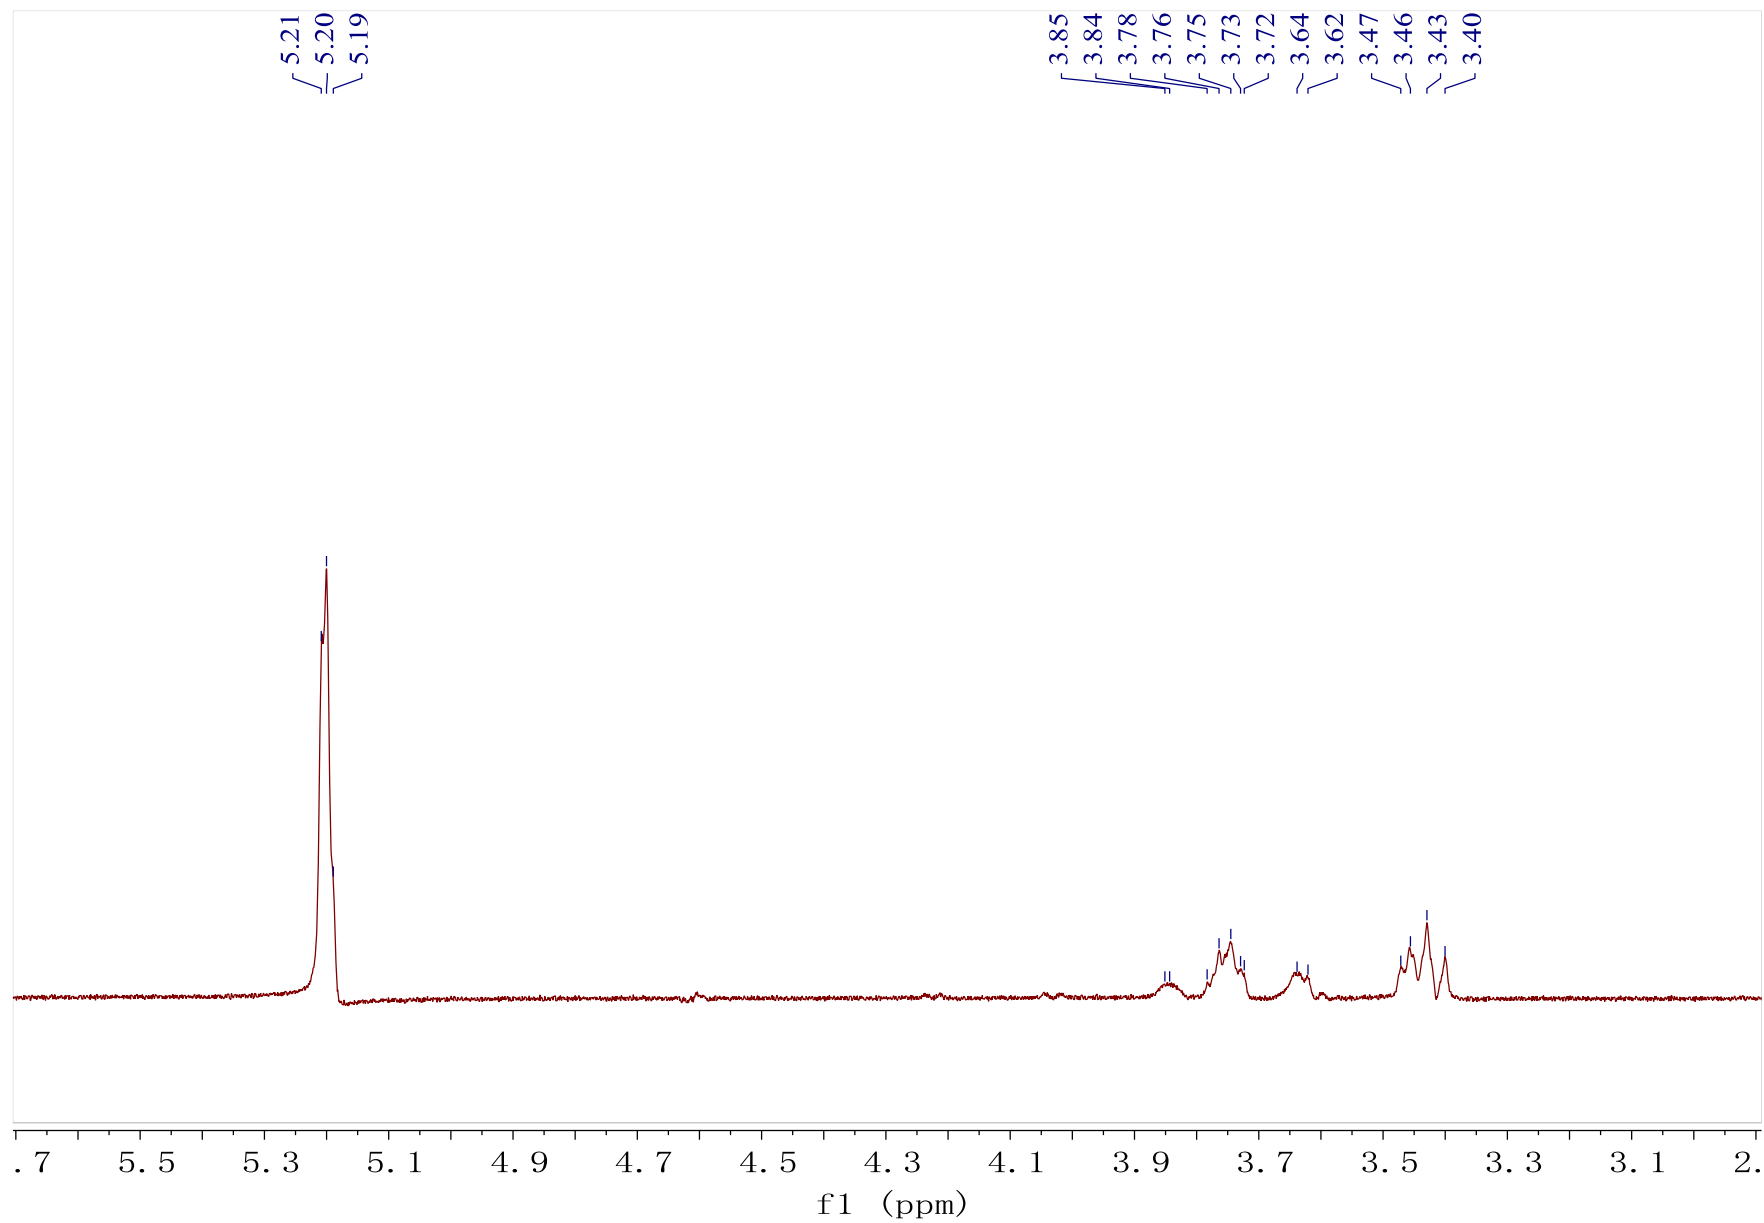

**Figure S93.** 1D-selective TOCSY spectrum of compound **14** (500 MHz, D<sub>2</sub>O, excitation at  $\delta$  5.20, H-A1 $\alpha$ ).

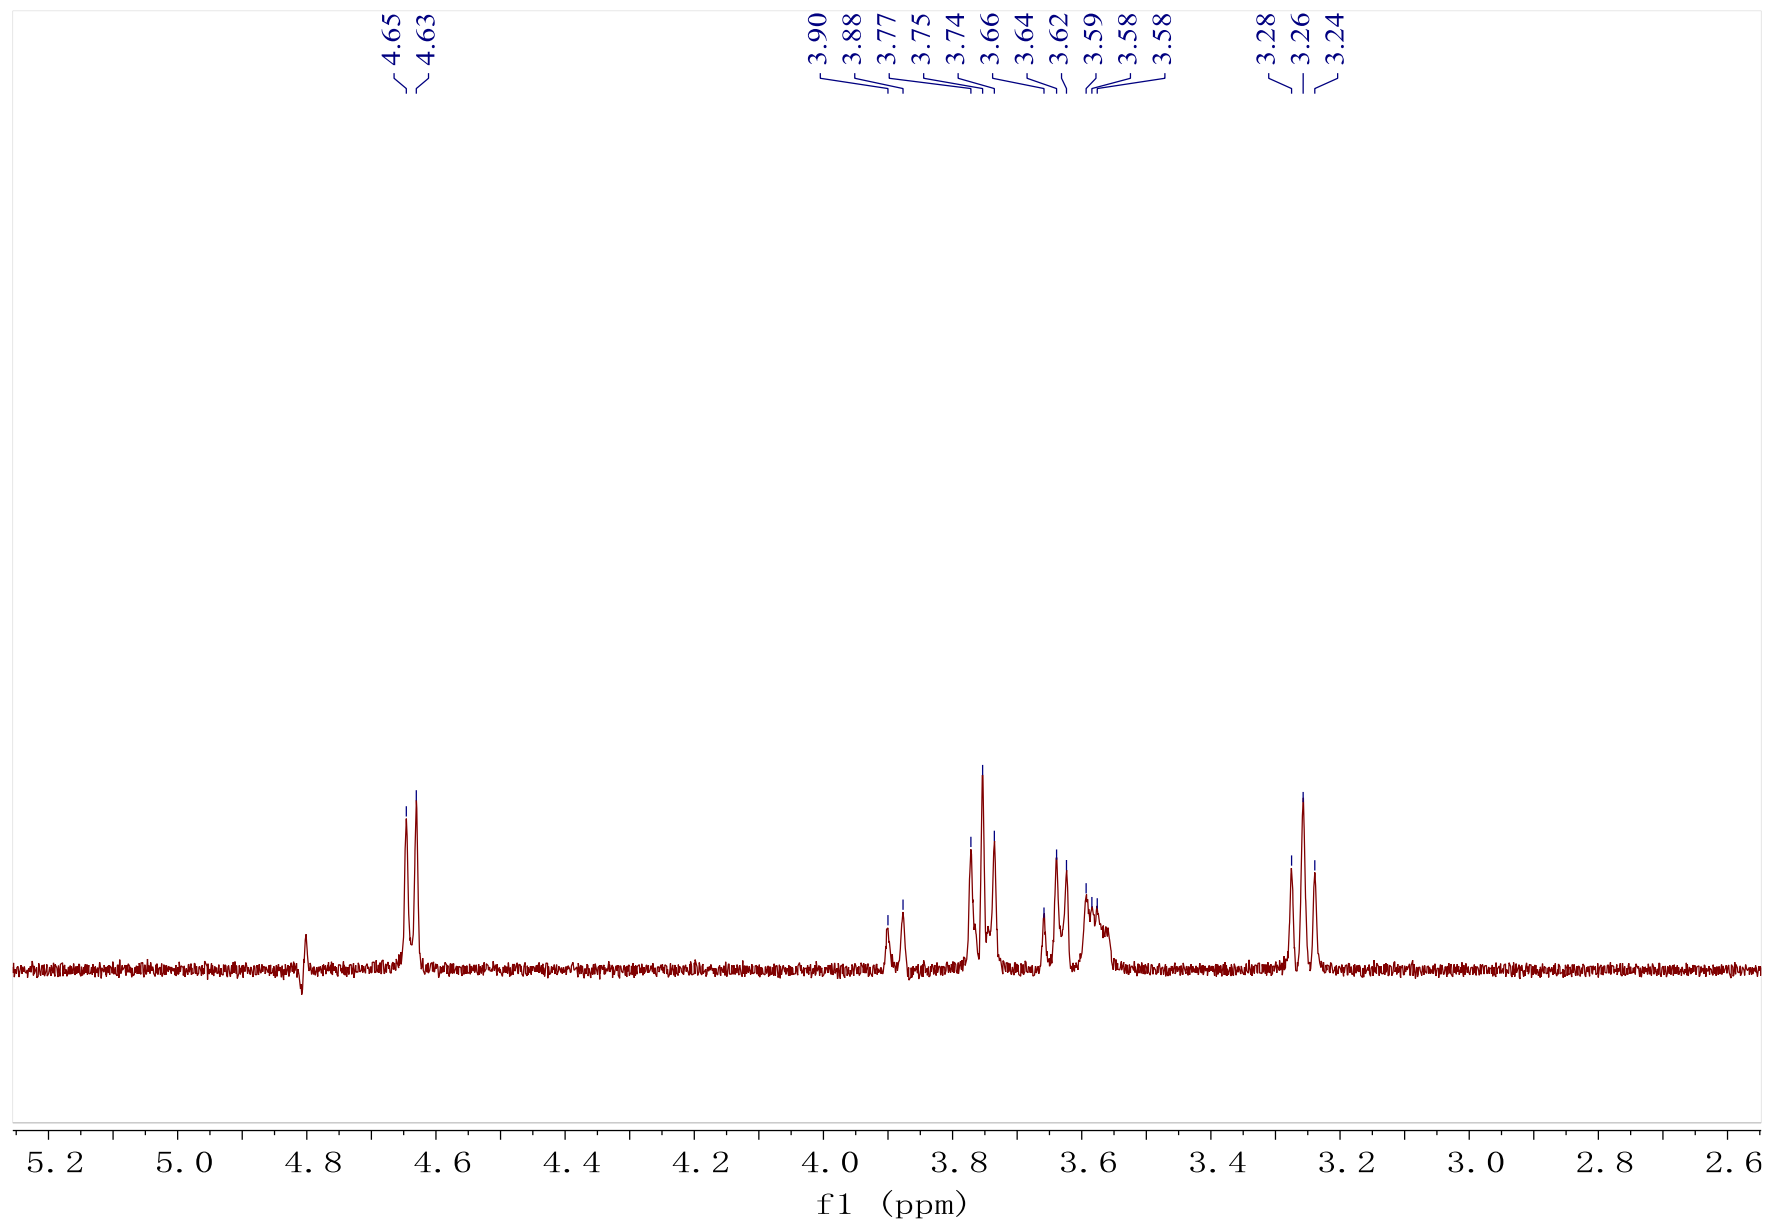

**Figure S94.** 1D-selective TOCSY spectrum of compound **14** (500 MHz, D<sub>2</sub>O, excitation at  $\delta$  4.62, H-A1 $\beta$ ).

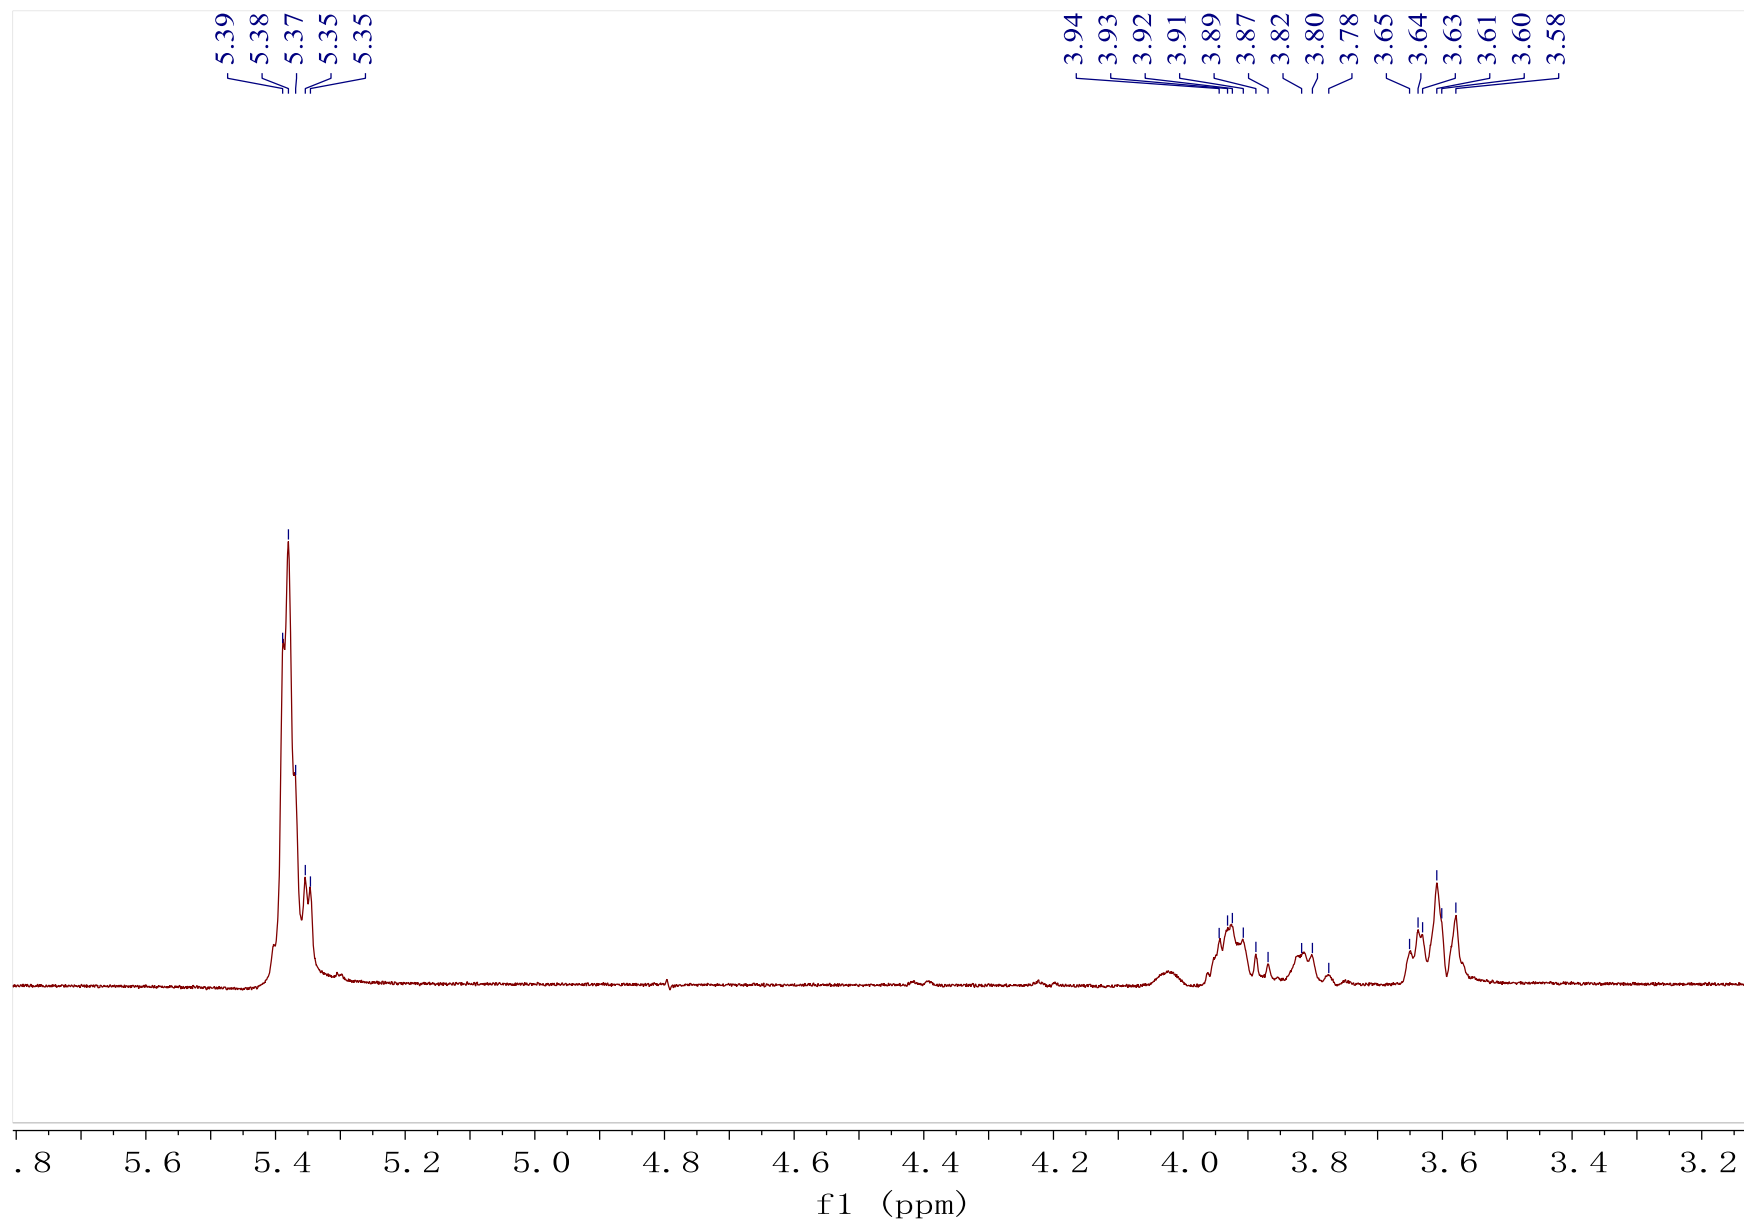

**Figure S95.** 1D-selective TOCSY spectrum of compound **14** (500 MHz, D<sub>2</sub>O, excitation at  $\delta$  5.38, H-**B1**, H-**C1**, and H-**D1**).

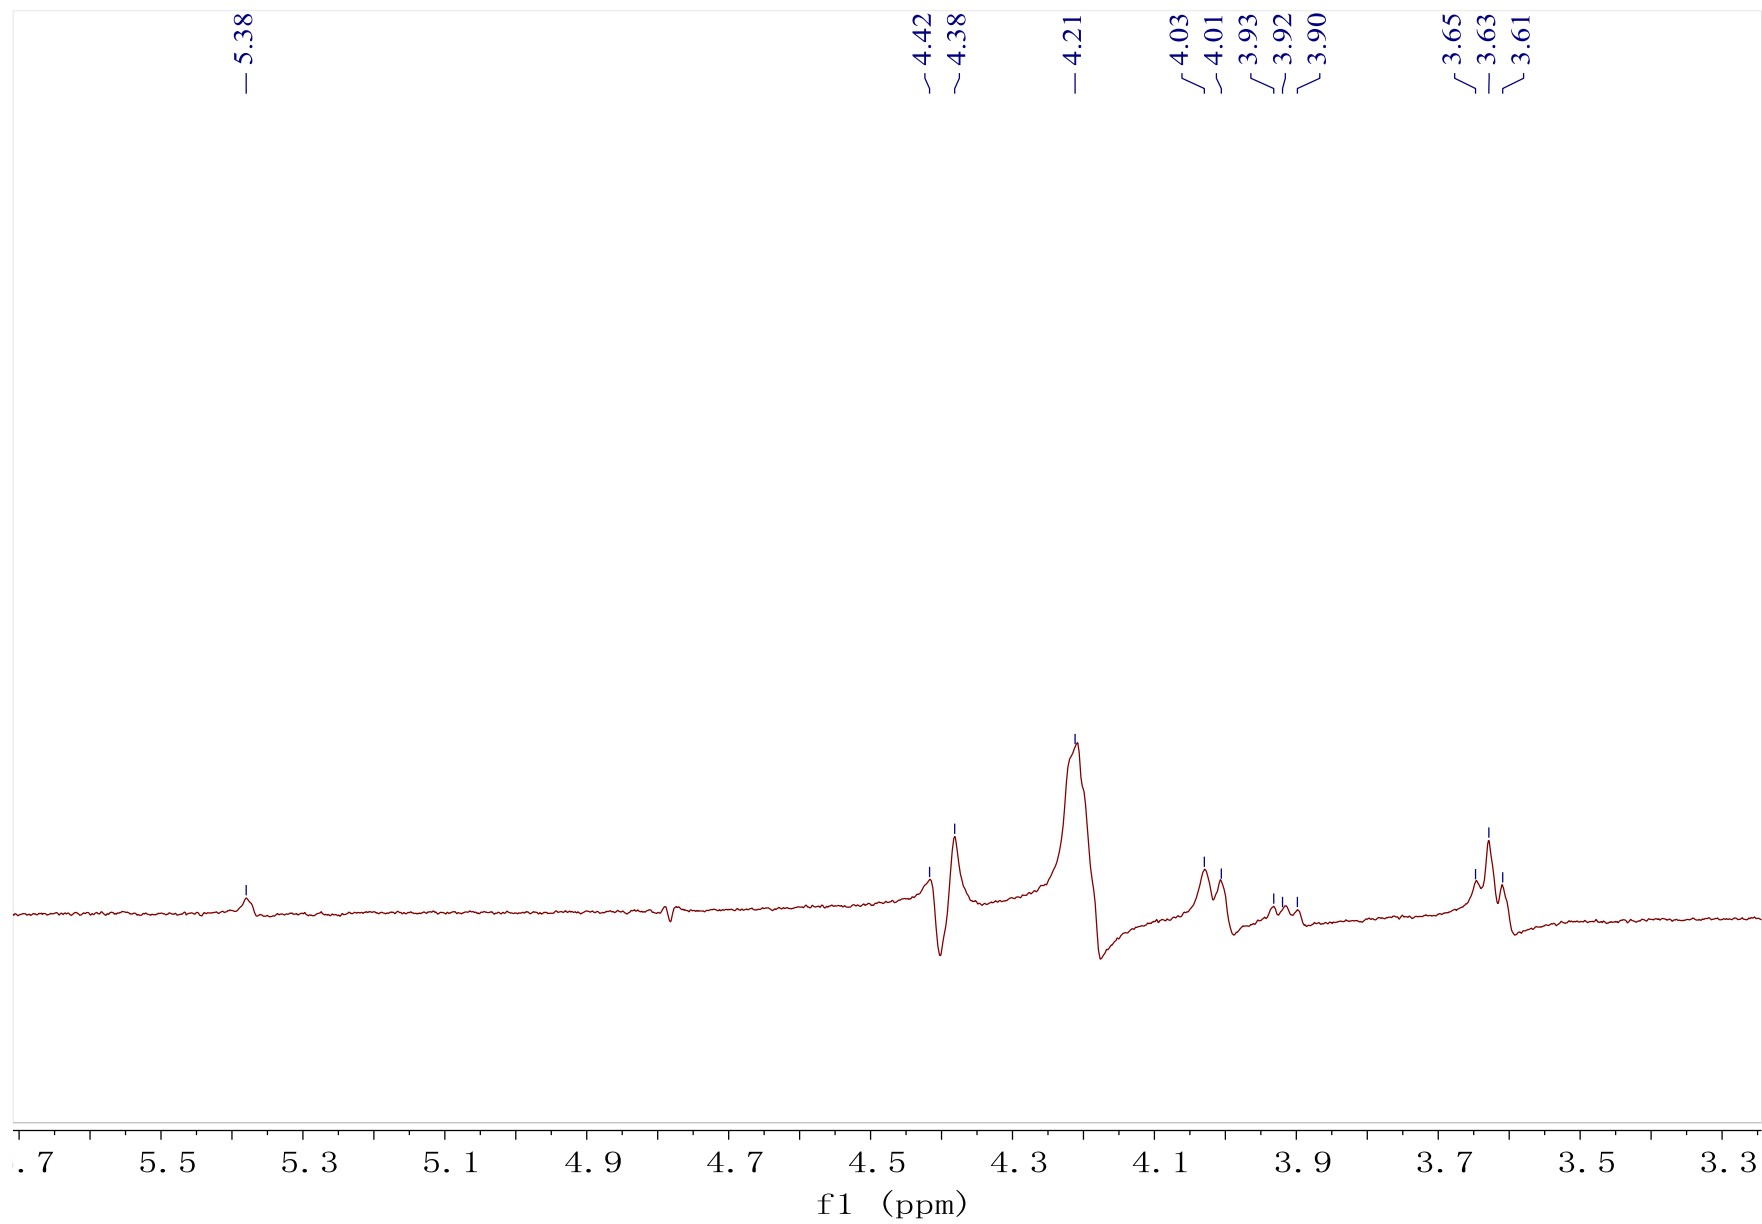

**Figure S96.** 1D-selective TOCSY spectrum of compound **14** (500 MHz, D<sub>2</sub>O, excitation at  $\delta$  4.40, H-**D**6a).

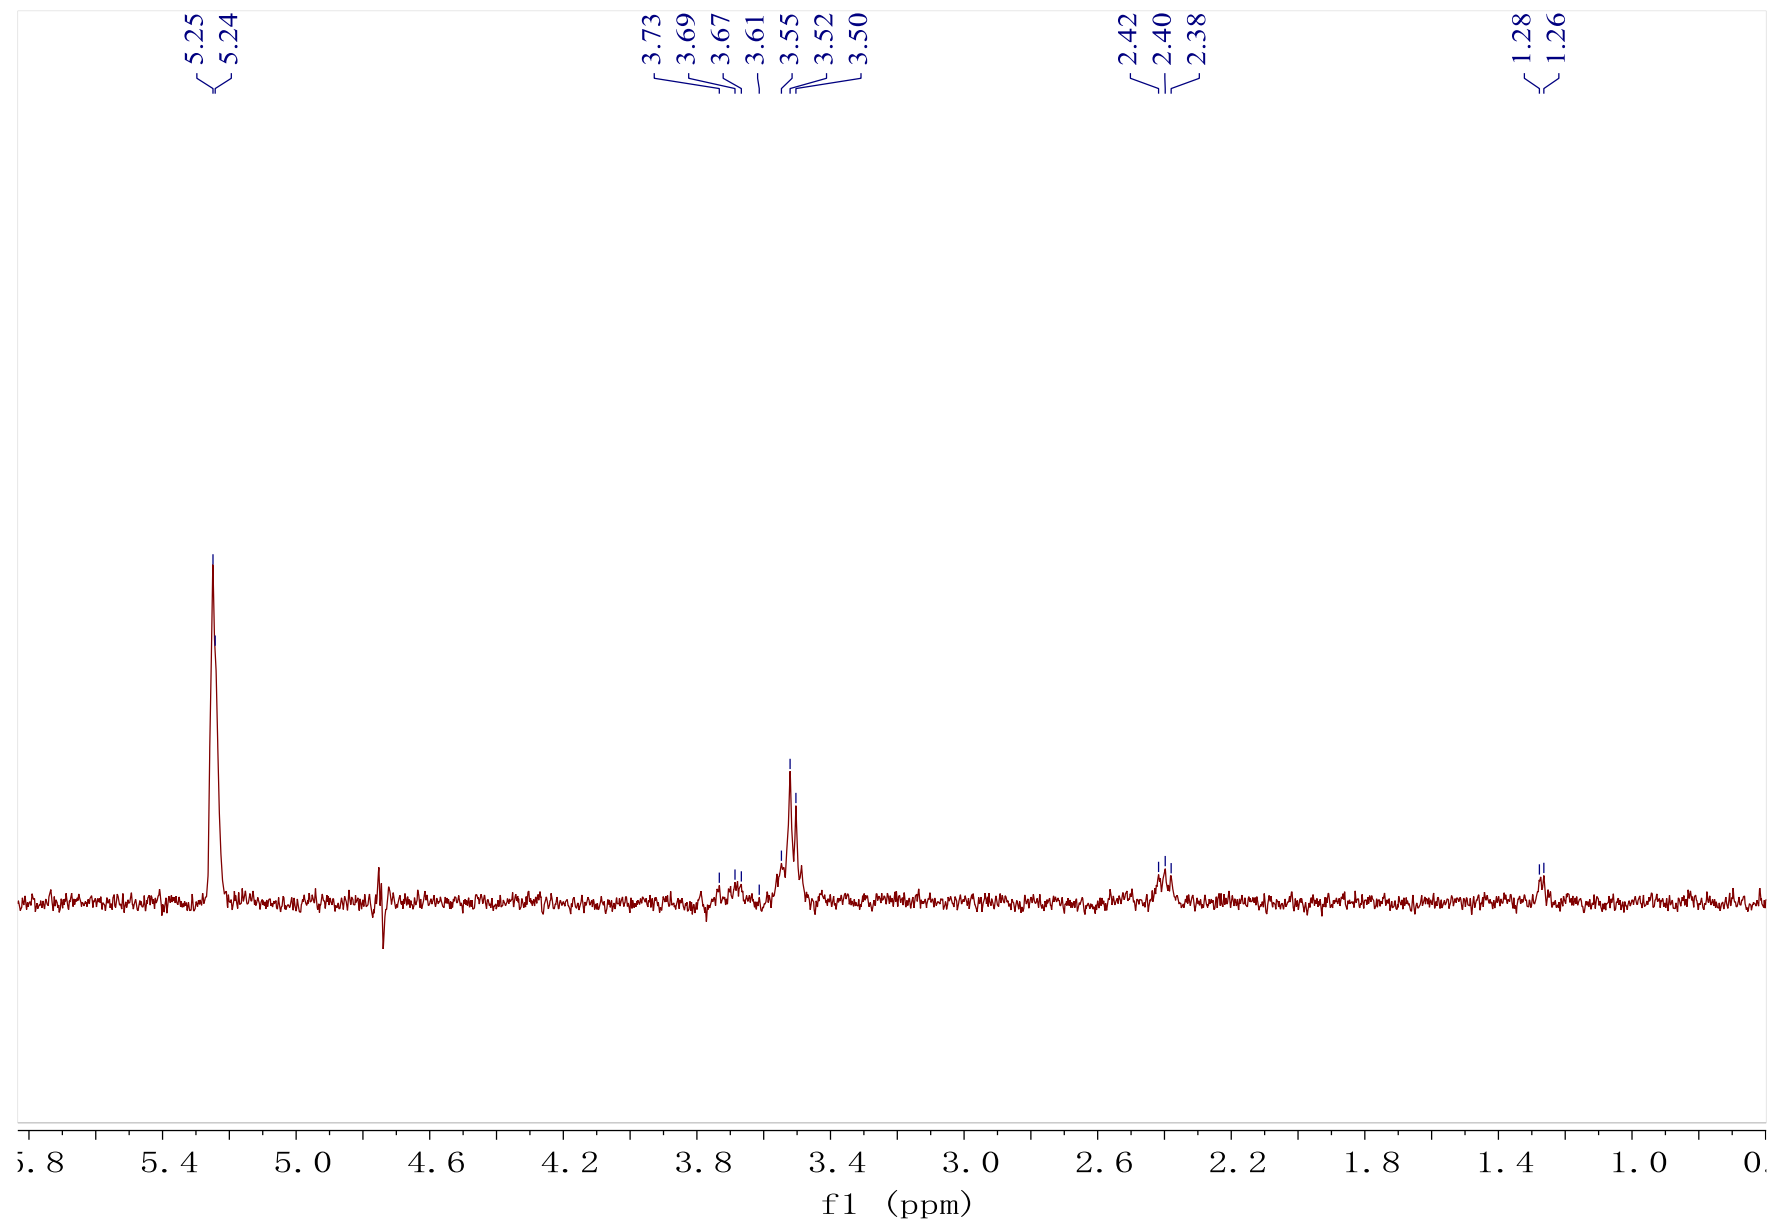

**Figure S97.** 1D-selective TOCSY spectrum of compound **14** (500 MHz, D<sub>2</sub>O, excitation at  $\delta$  5.25, H-E1).

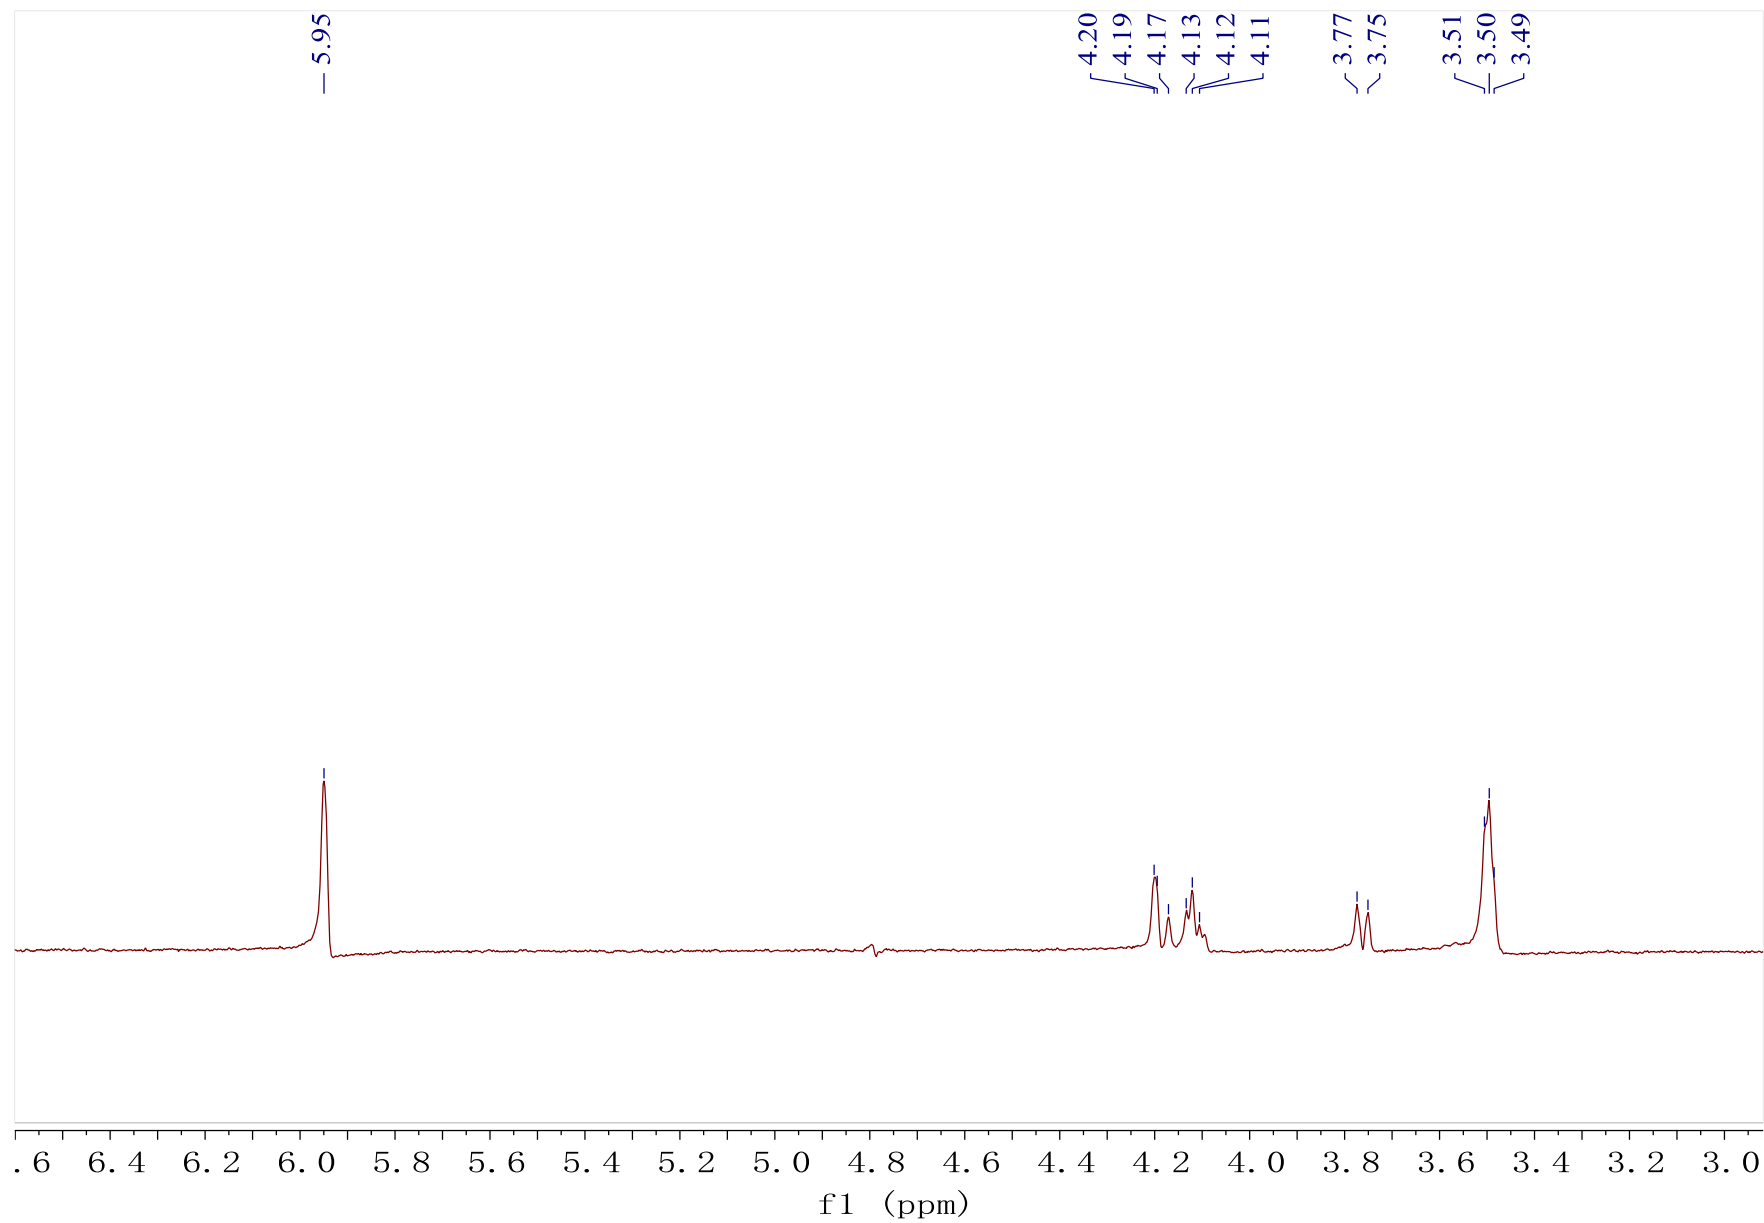

**Figure S98.** 1D-selective TOCSY spectrum of compound **14** (500 MHz, D<sub>2</sub>O, excitation at  $\delta$  5.94, H-F7).

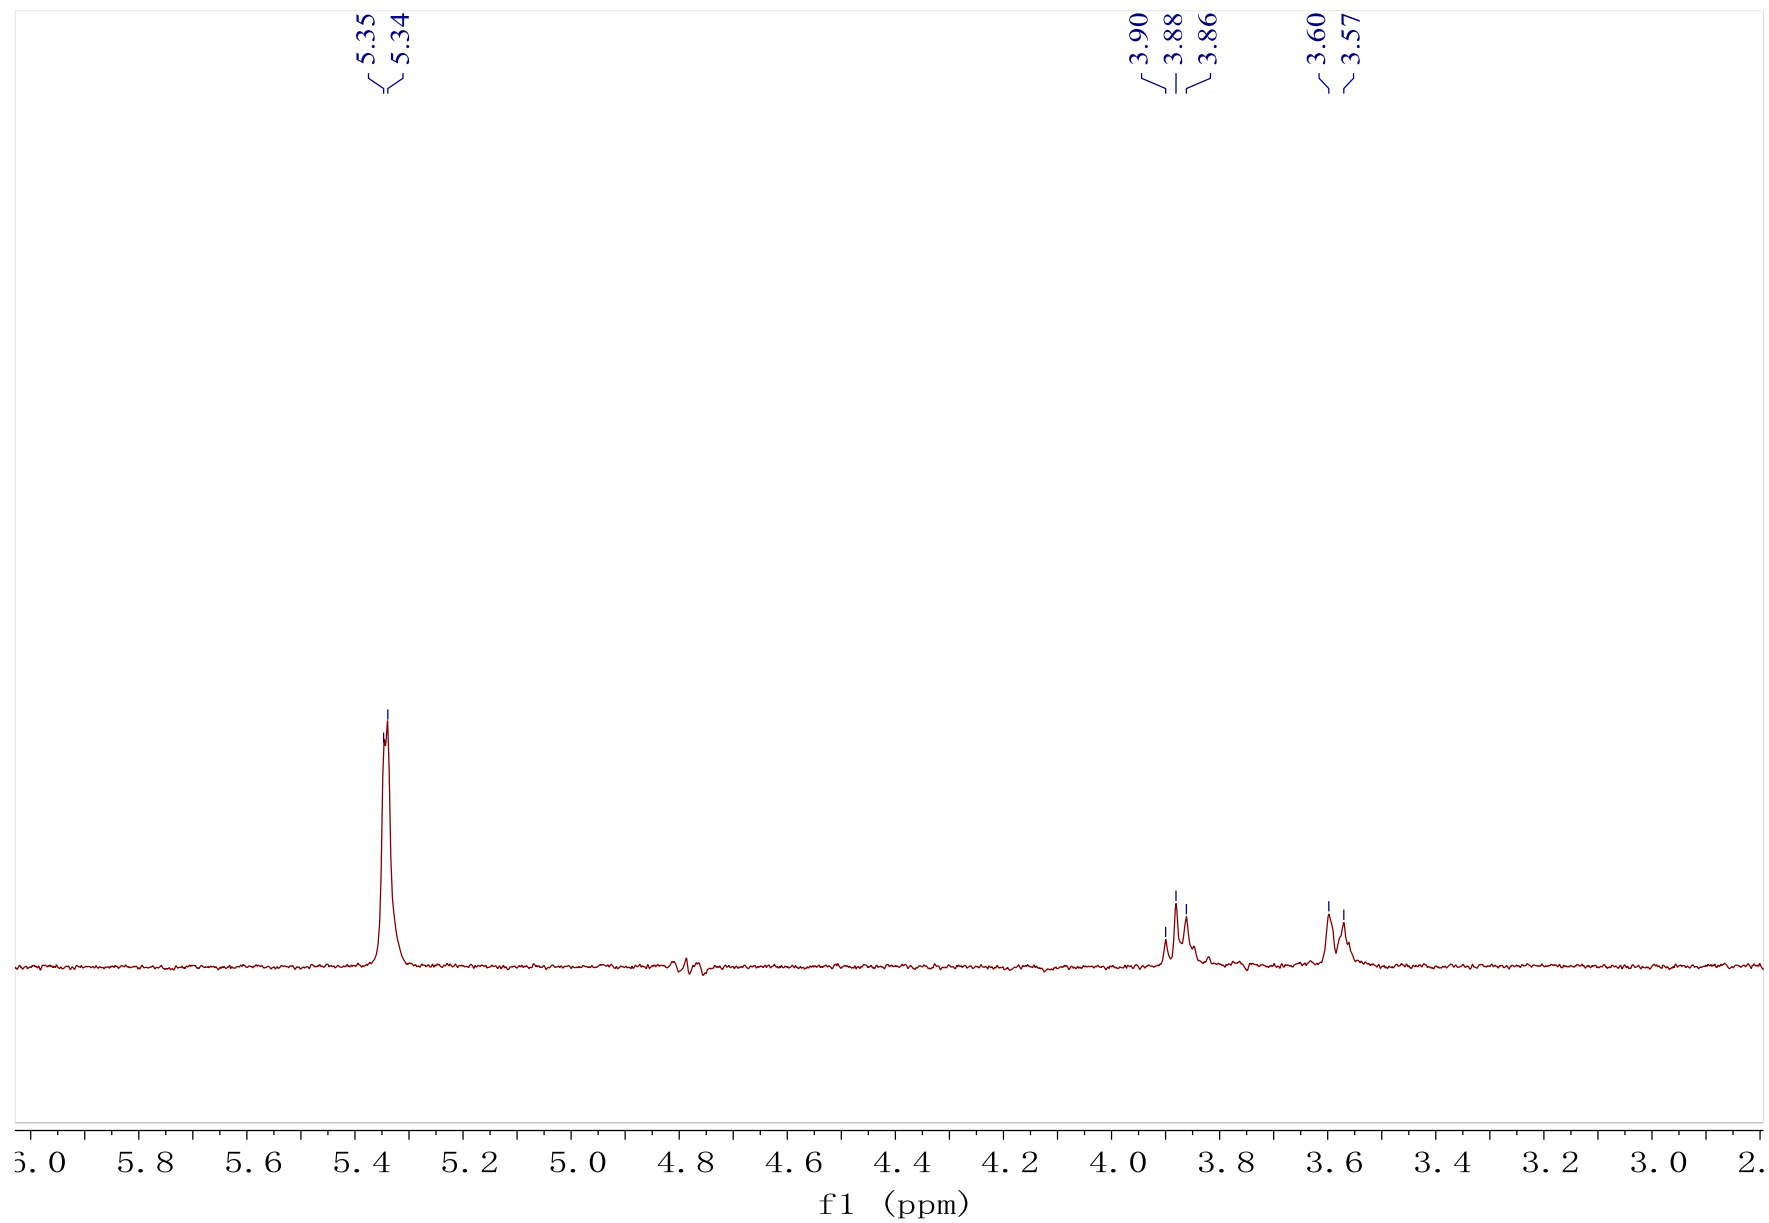

**Figure S99.** 1D-selective TOCSY spectrum of compound **14** (500 MHz, D<sub>2</sub>O, excitation at  $\delta$  5.34, H-G1).



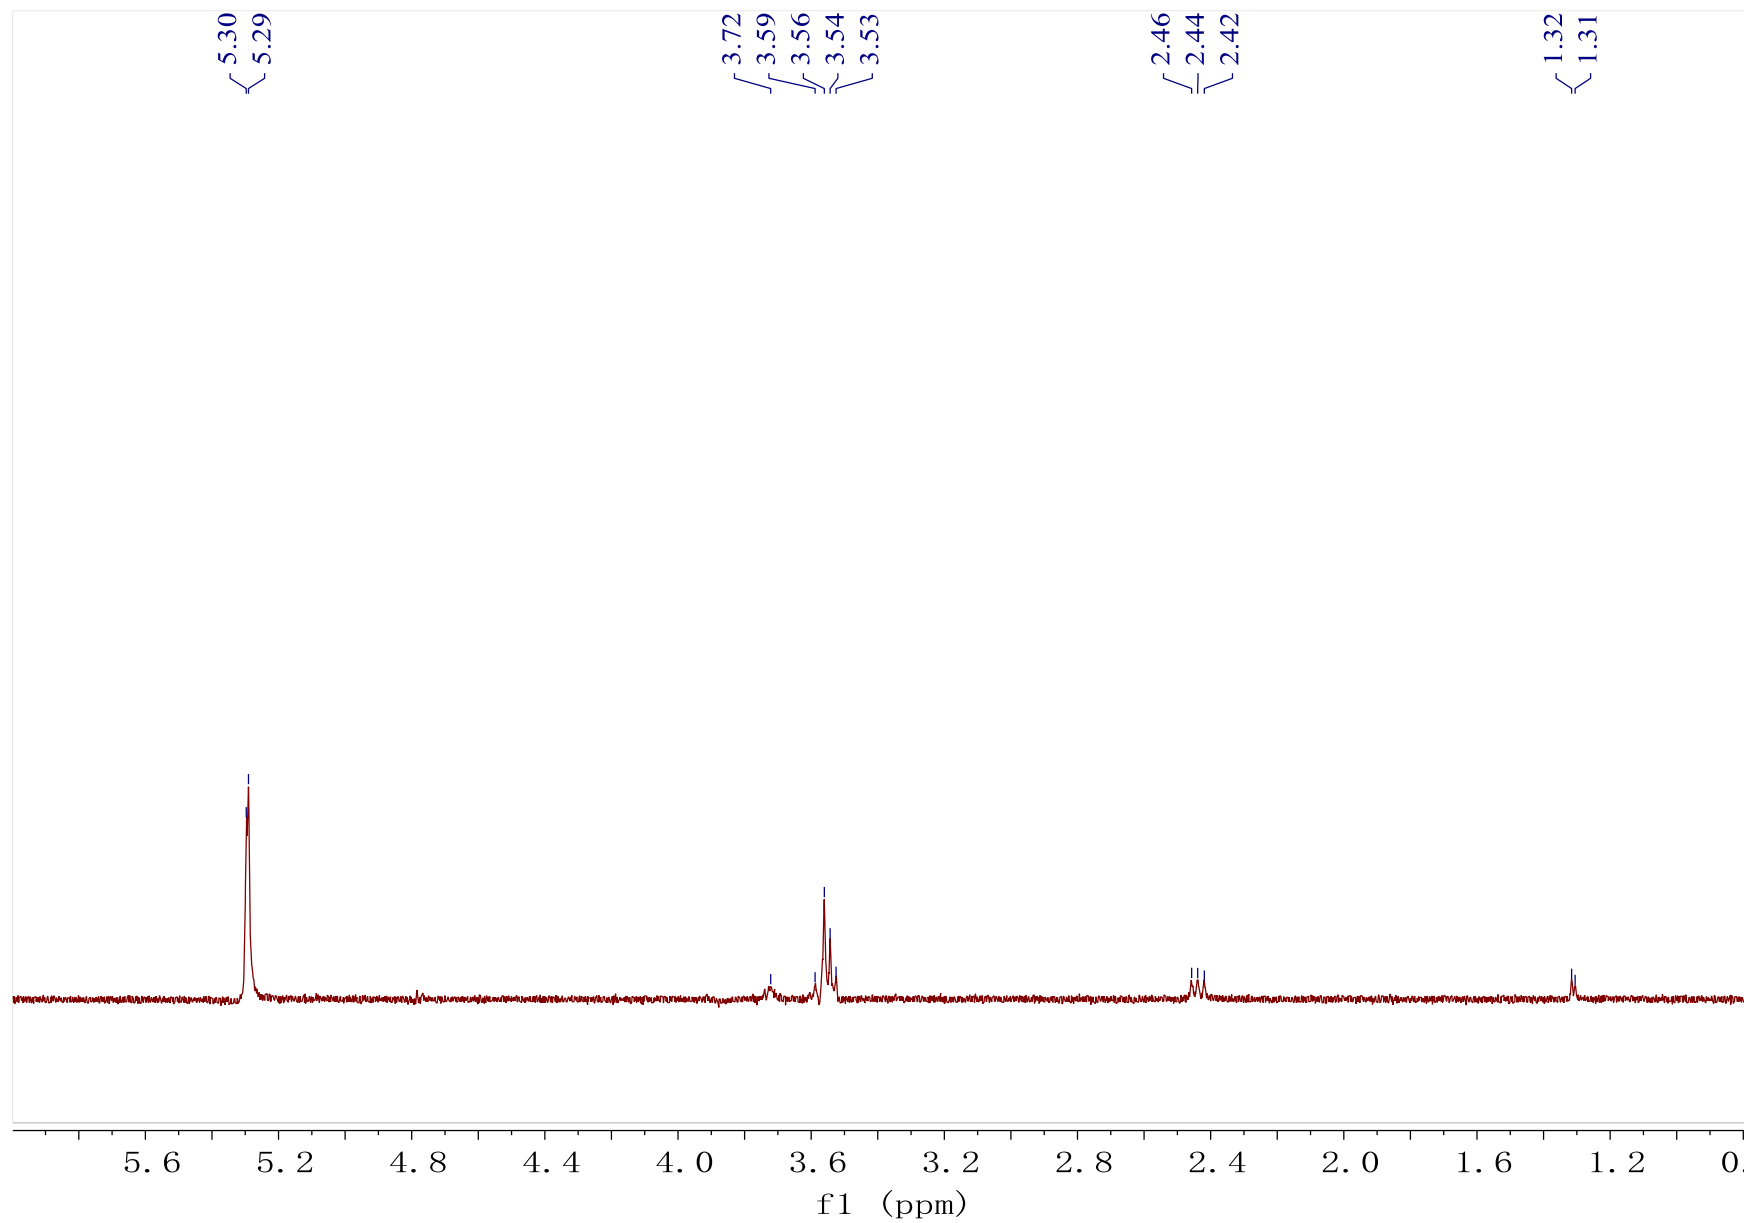

**Figure S100.** 1D-selective TOCSY spectrum of compound **14** (500 MHz, D<sub>2</sub>O, excitation at  $\delta$  5.29, H-**H1**).

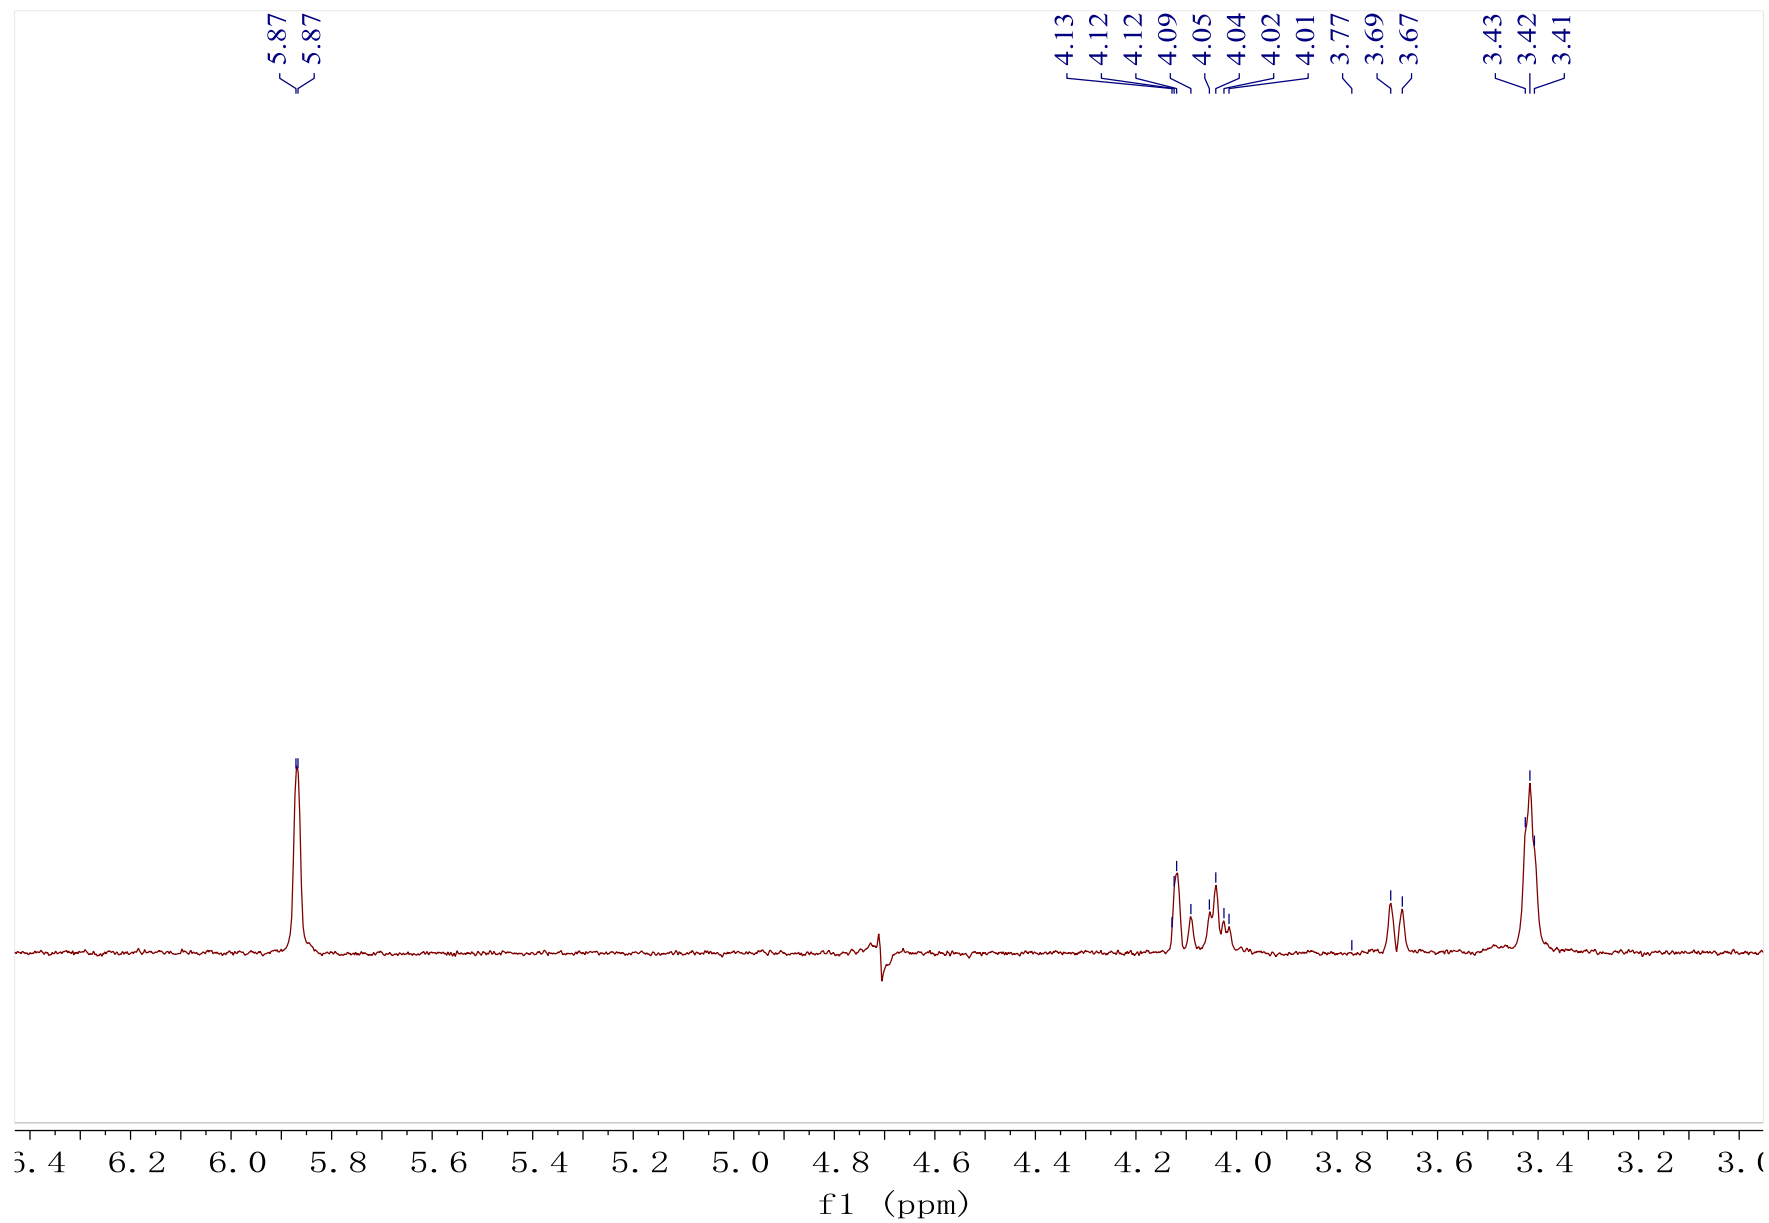

**Figure S101.** 1D-selective TOCSY spectrum of compound **14** (500 MHz, D<sub>2</sub>O, excitation at  $\delta$  5.86, H-**II**).

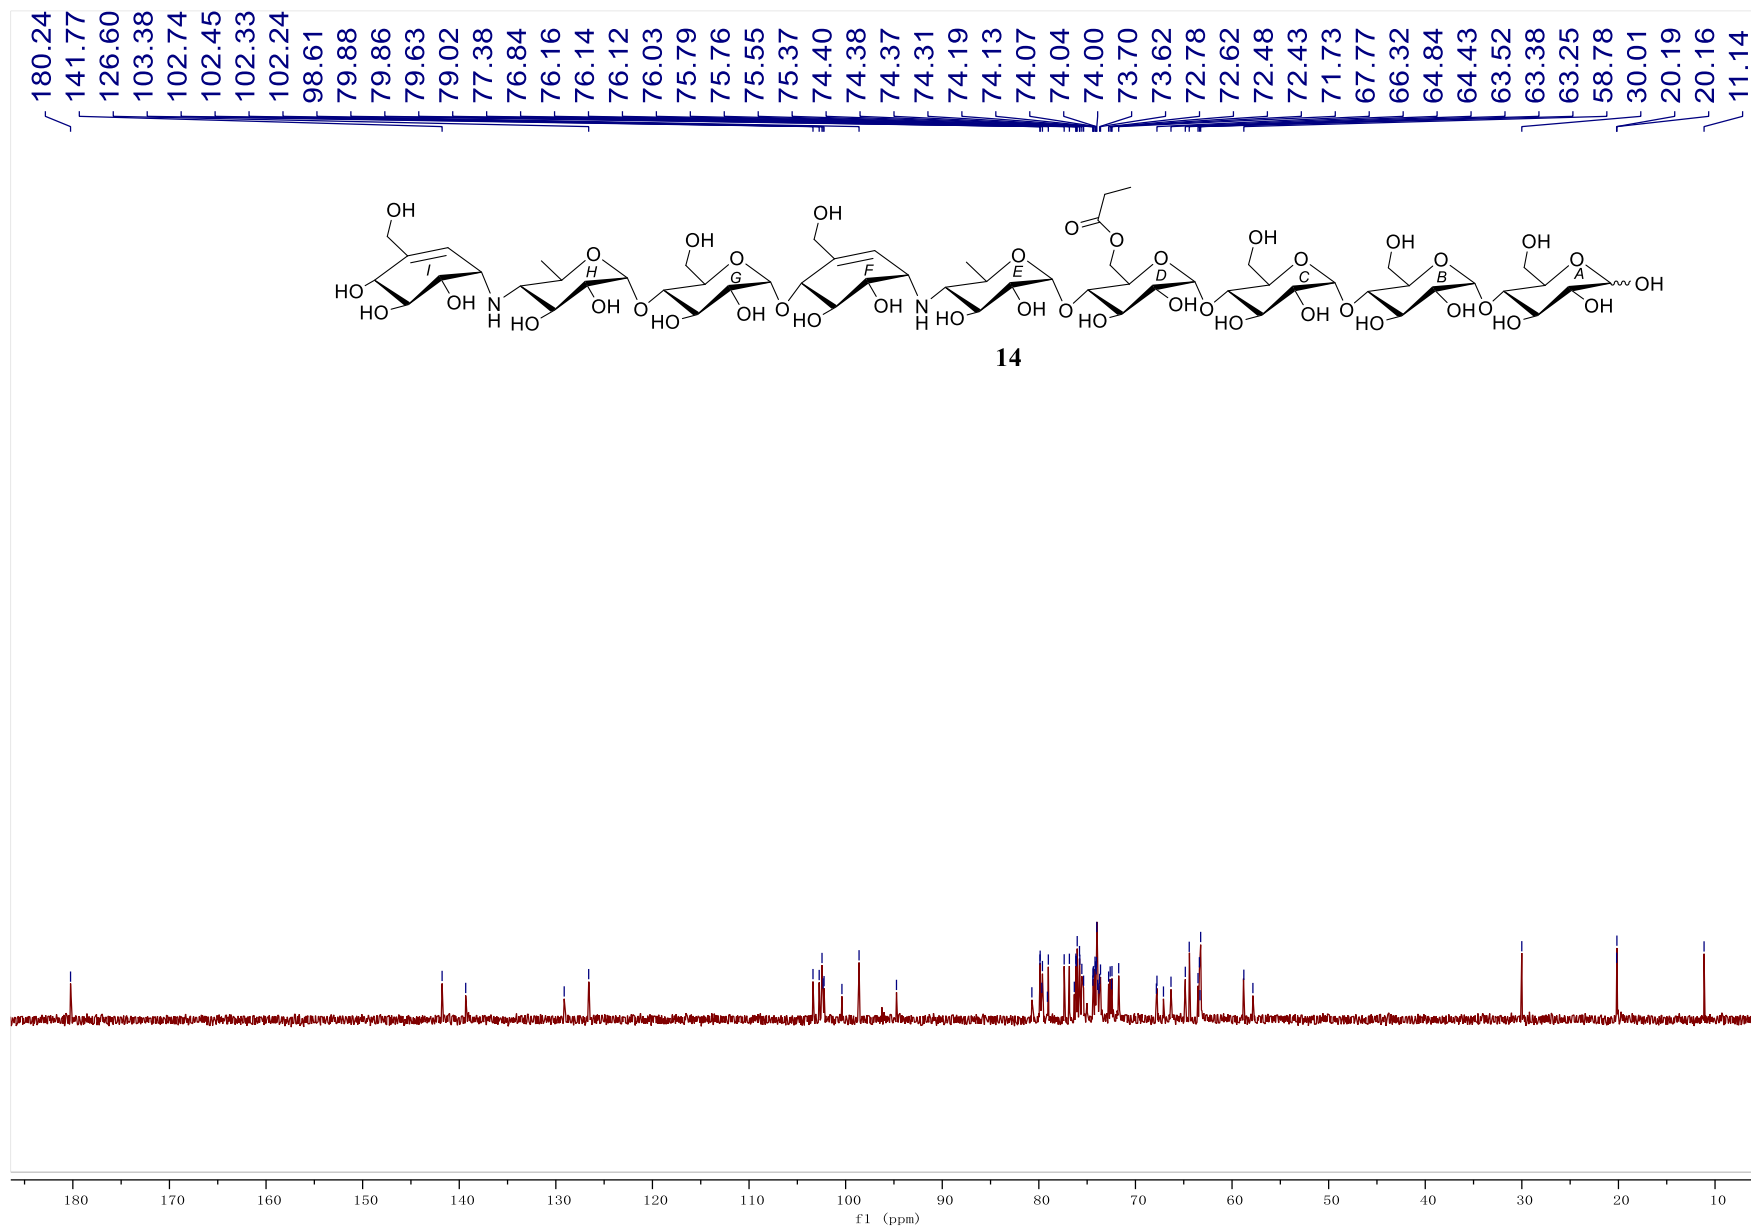

**Figure S102.**  $^{13}\text{C}$  NMR spectrum of compound **14** (125 MHz,  $\text{D}_2\text{O}$ ).

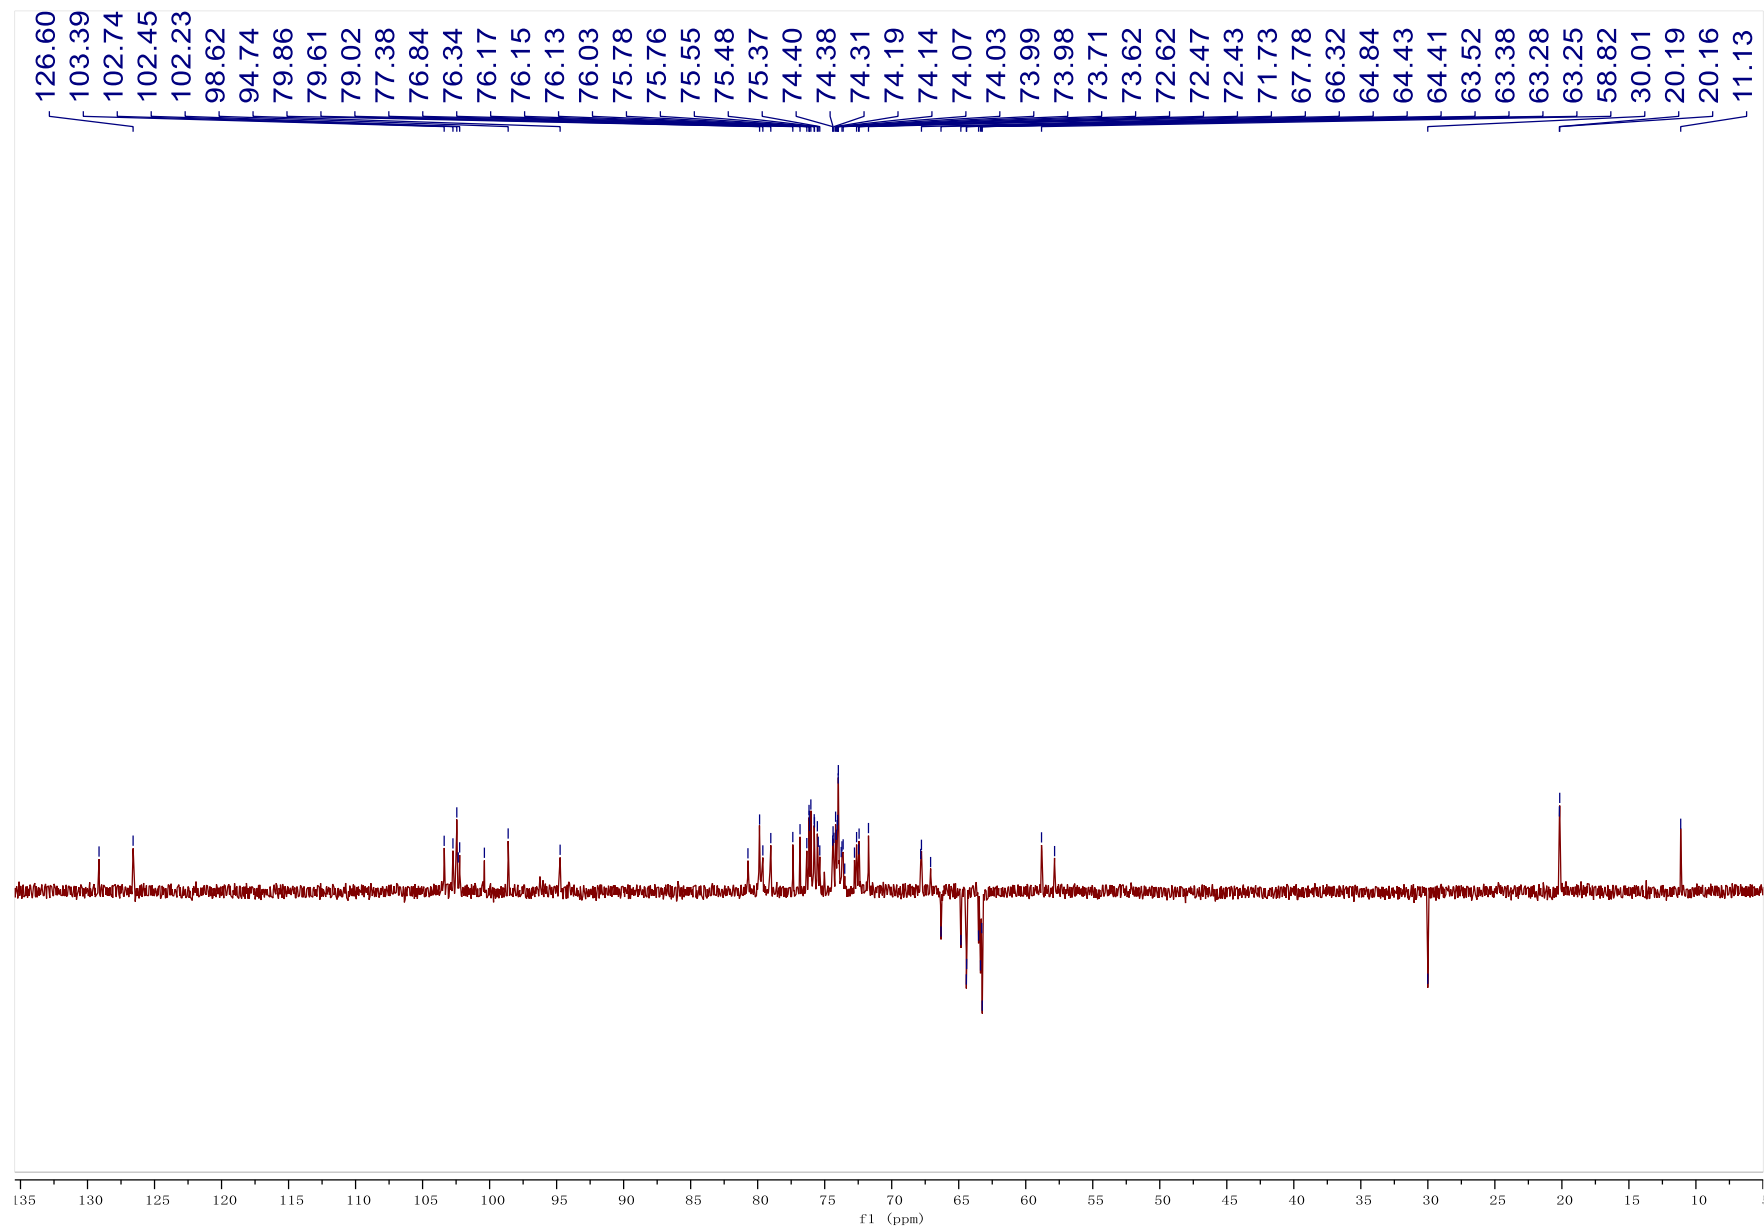

**Figure S103.** DEPT-135 spectrum of compound **14** (125 MHz, D<sub>2</sub>O).

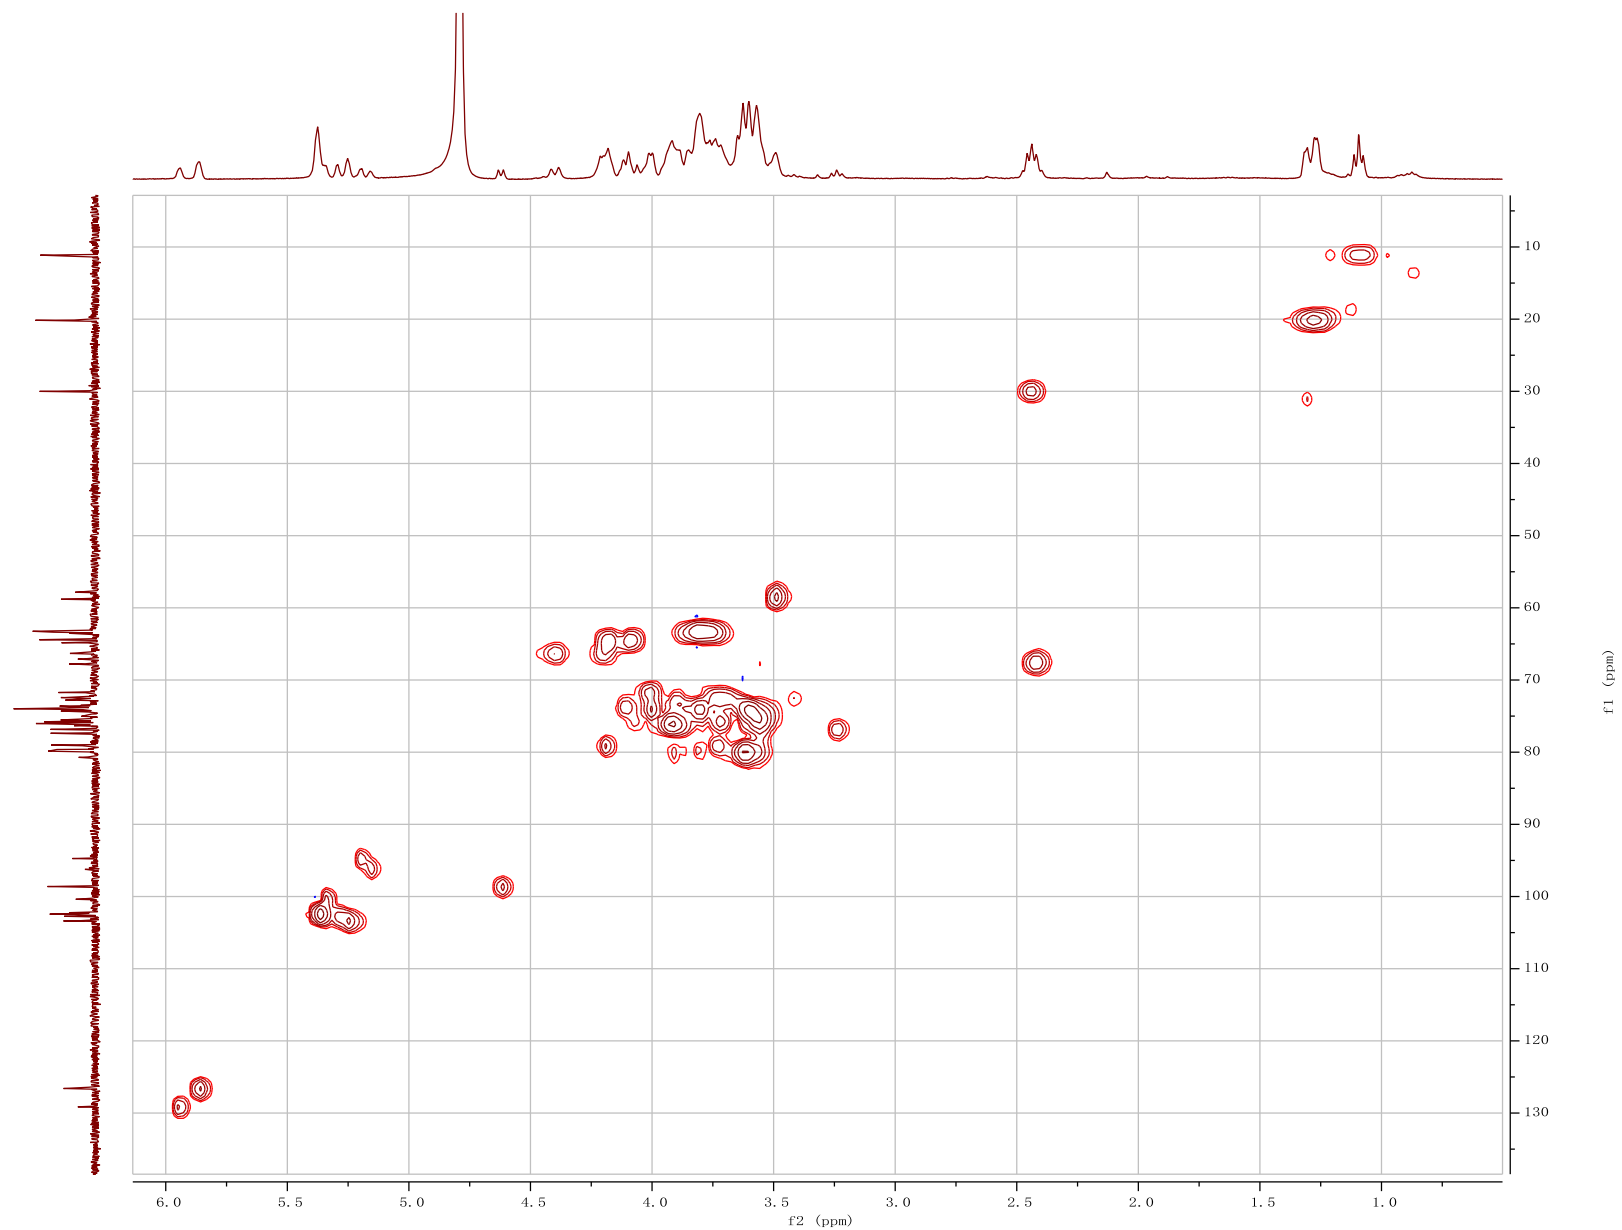

**Figure S104.** HSQC spectrum of compound **14** (500 MHz, D<sub>2</sub>O).

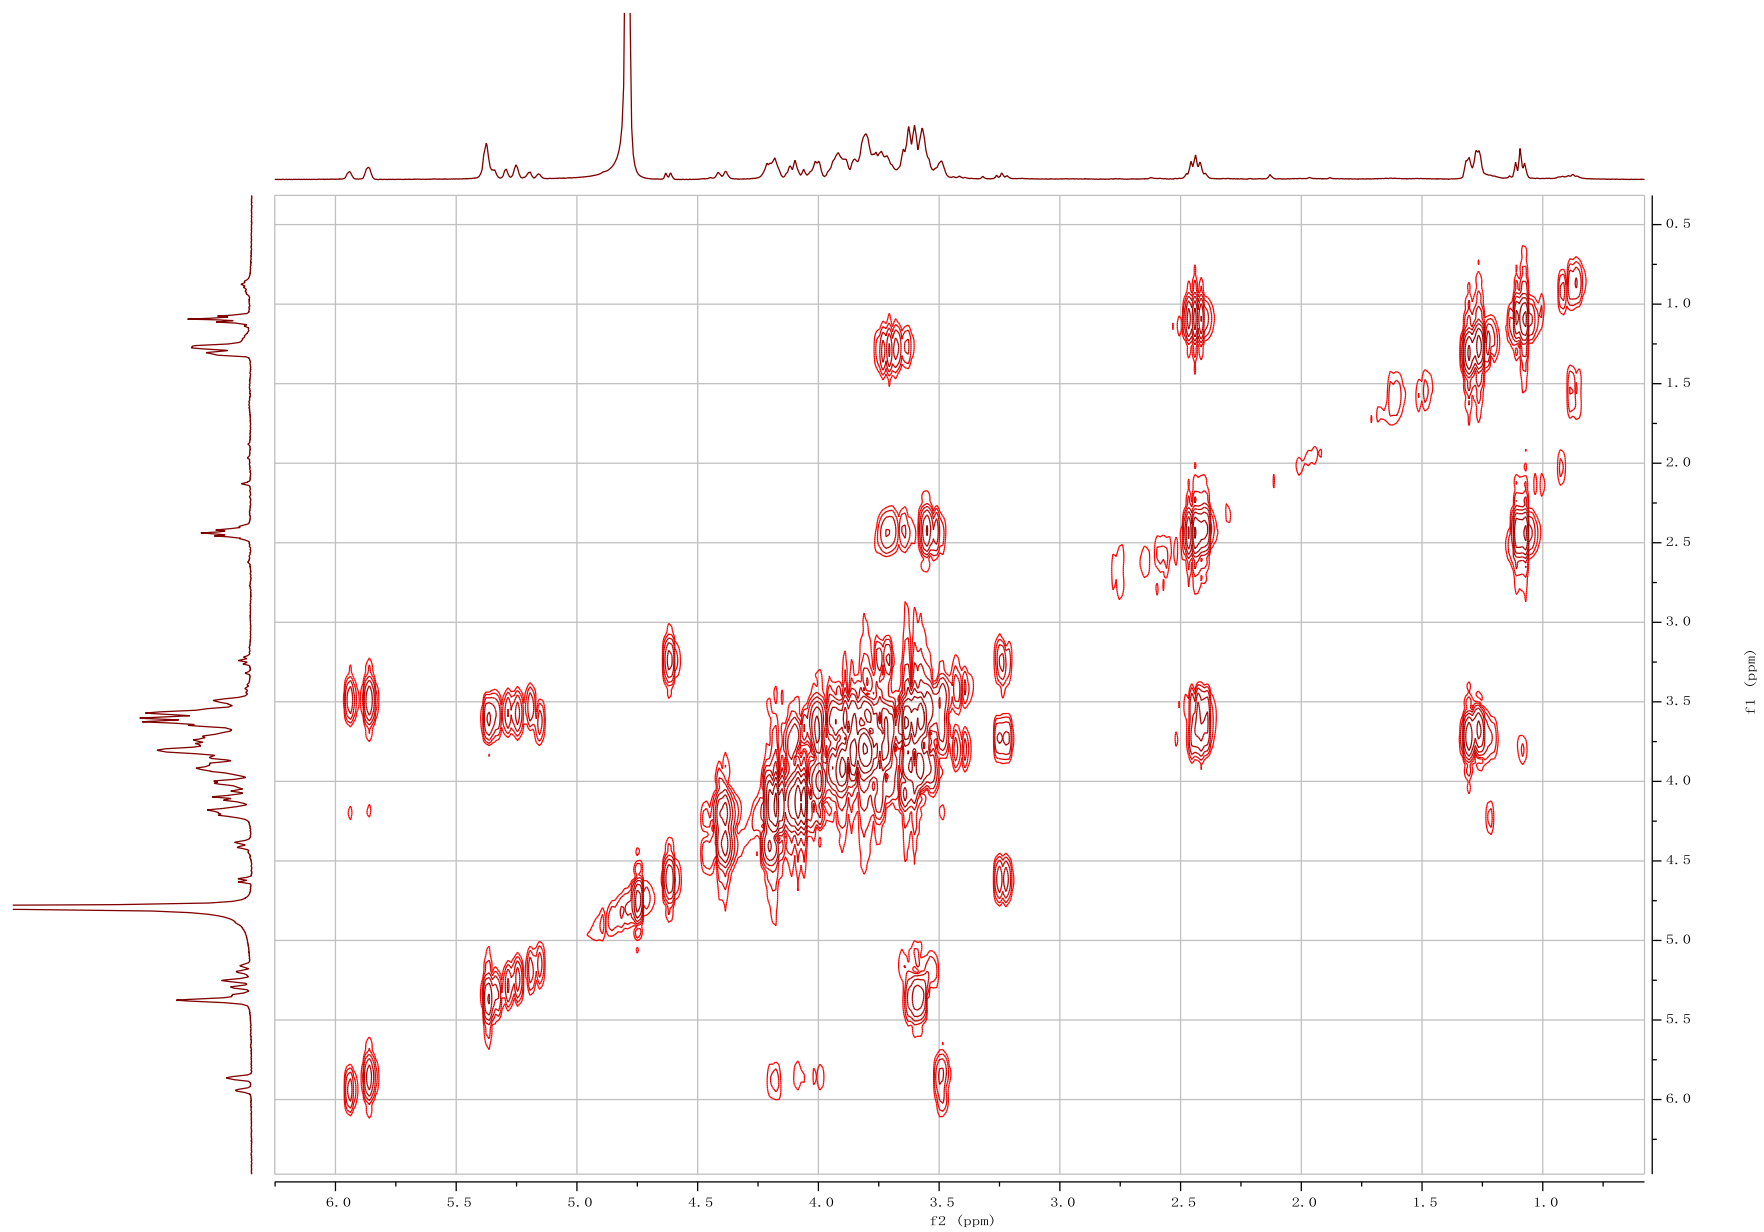

**Figure S105.**  $^1\text{H}$ - $^1\text{H}$  COSY spectrum of compound **14** (500 MHz,  $\text{D}_2\text{O}$ ).

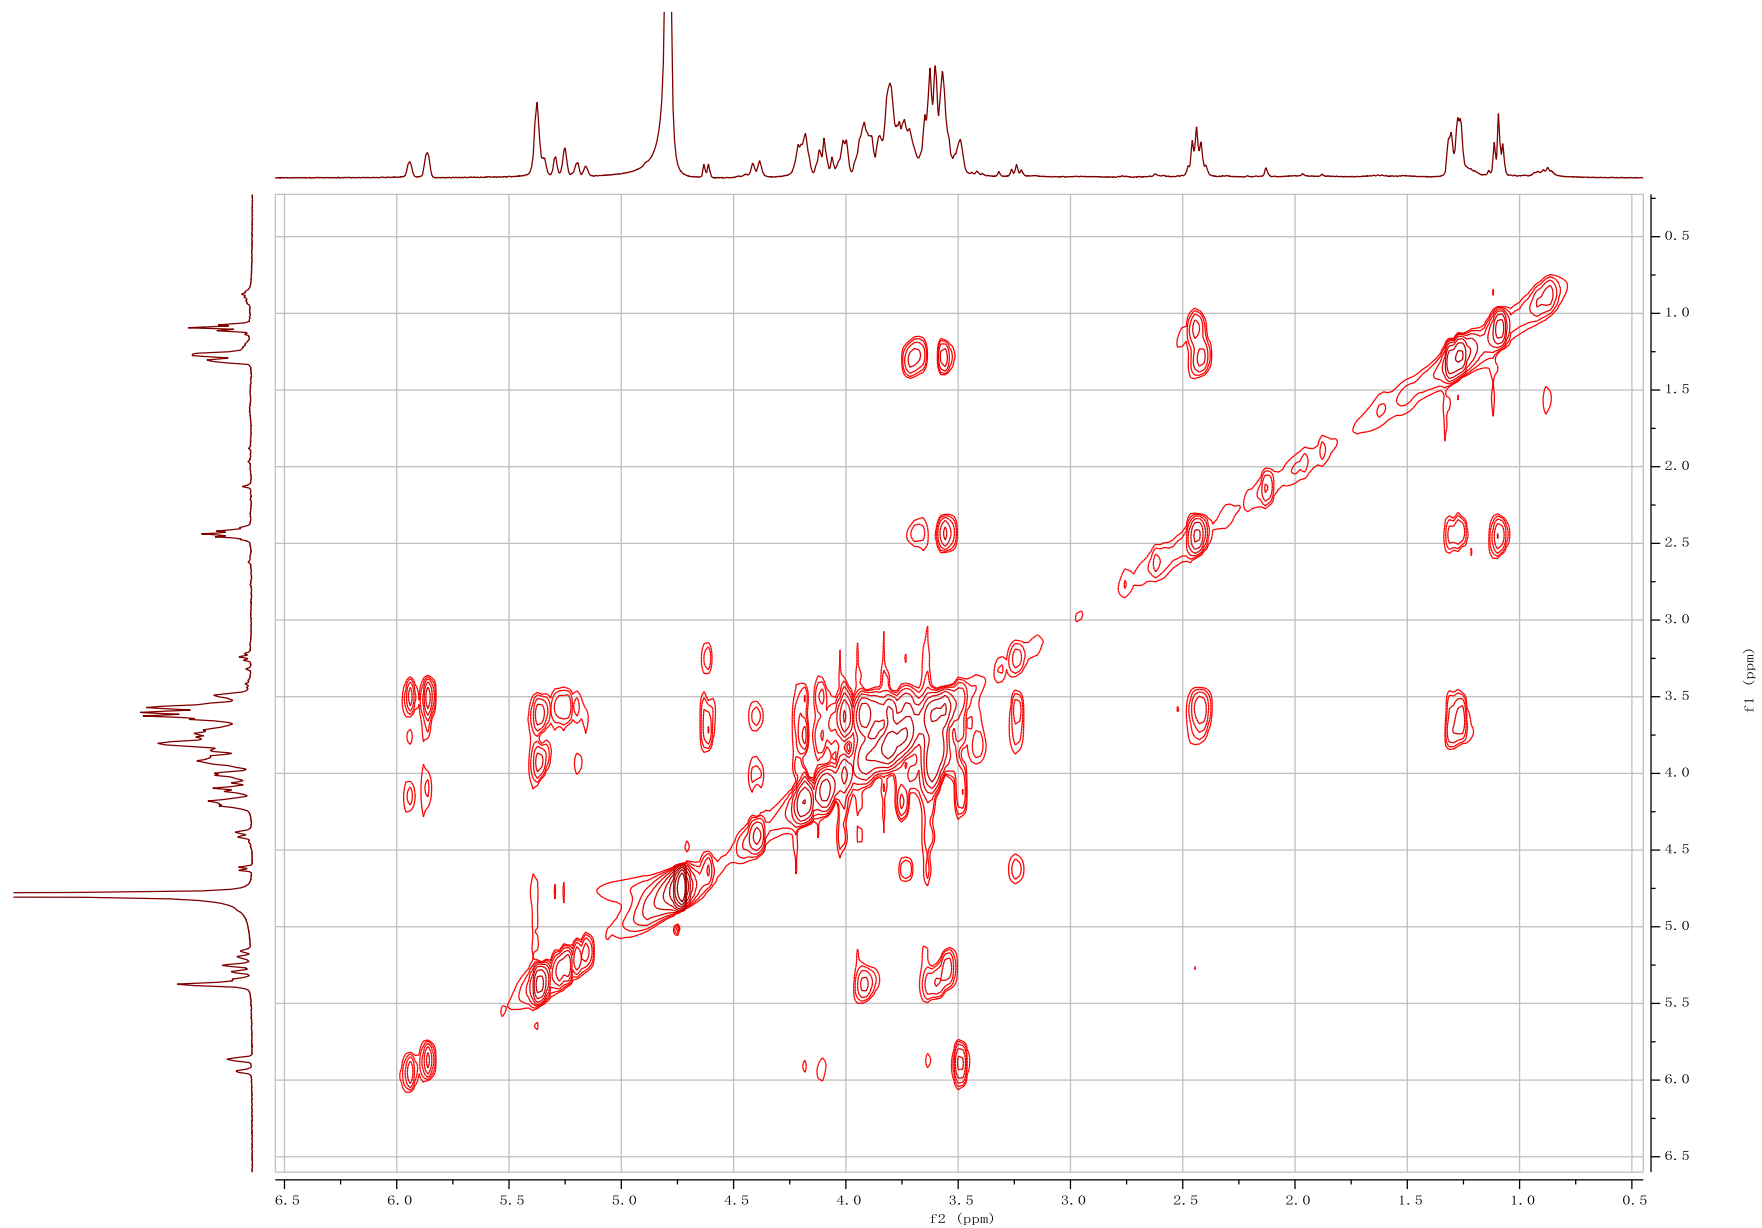

**Figure S106.** 2D-TOCSY spectrum of compound **14** (500 MHz, D<sub>2</sub>O).

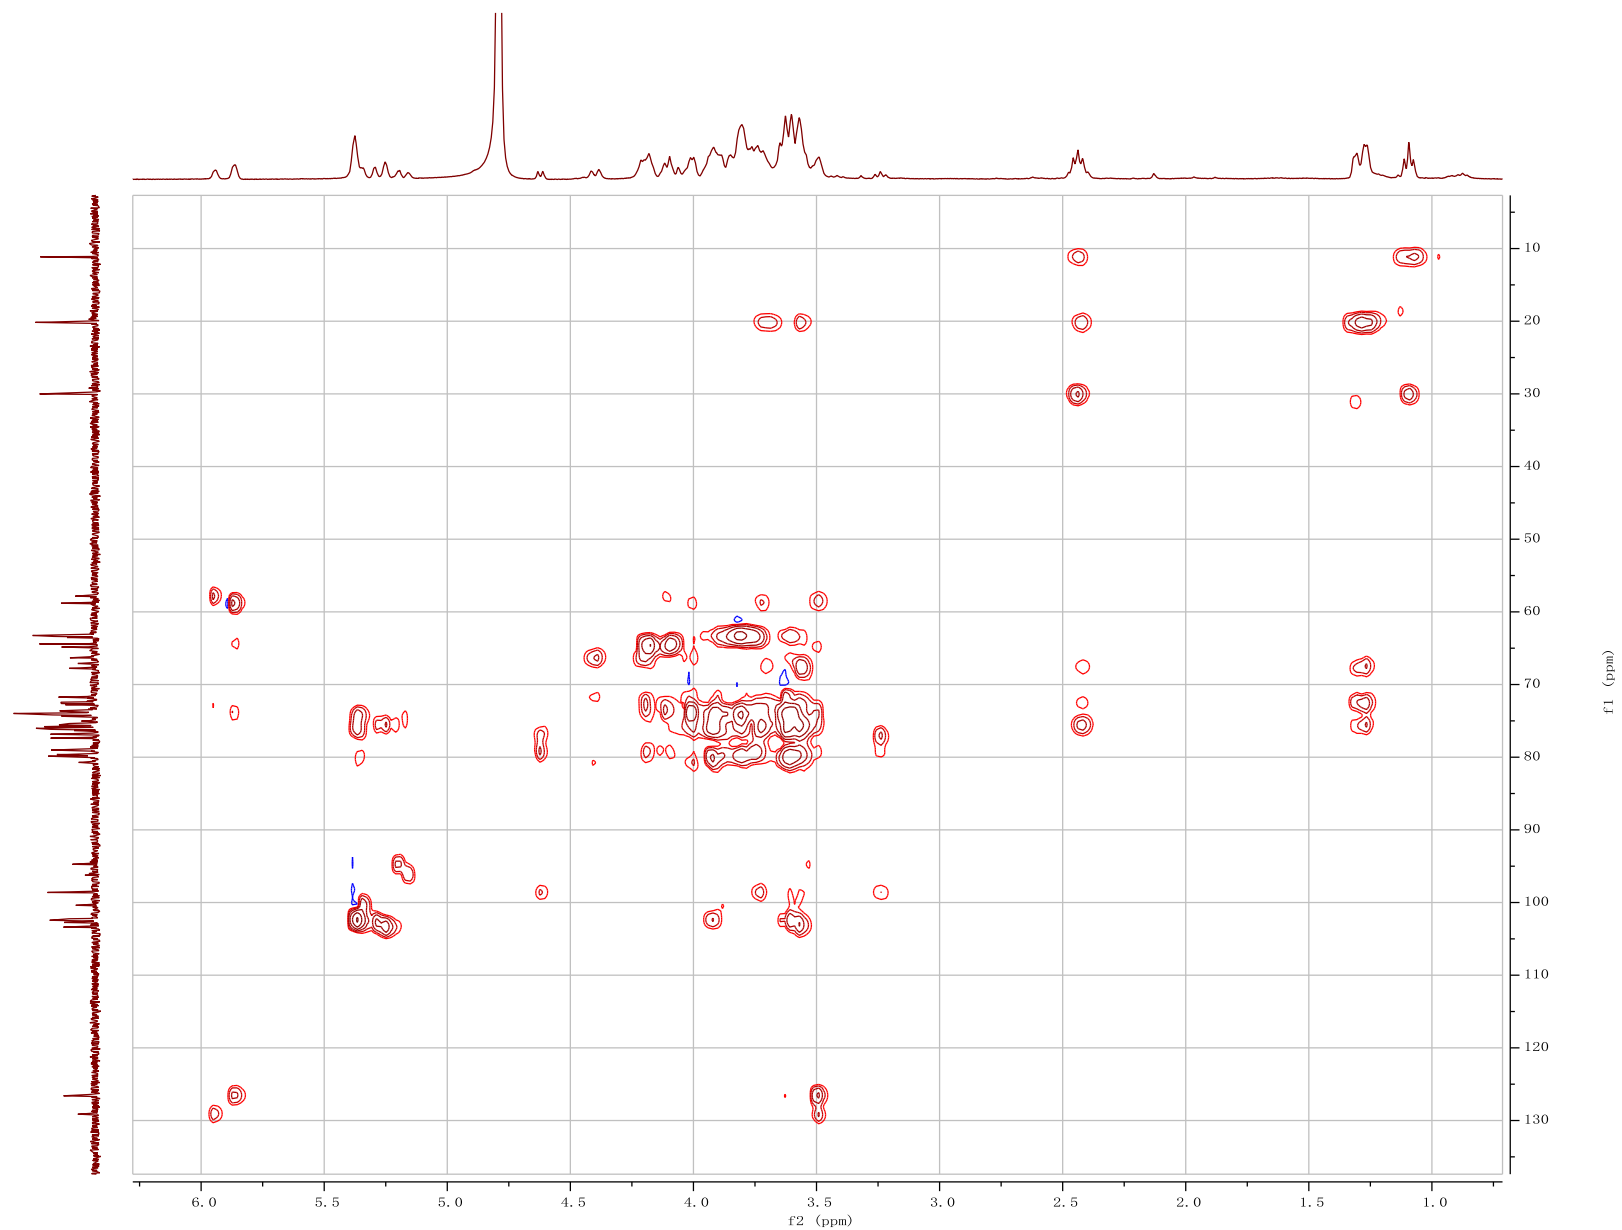

**Figure S107.** HSQC-TOCSY spectrum of compound **14** (500 MHz, D<sub>2</sub>O).



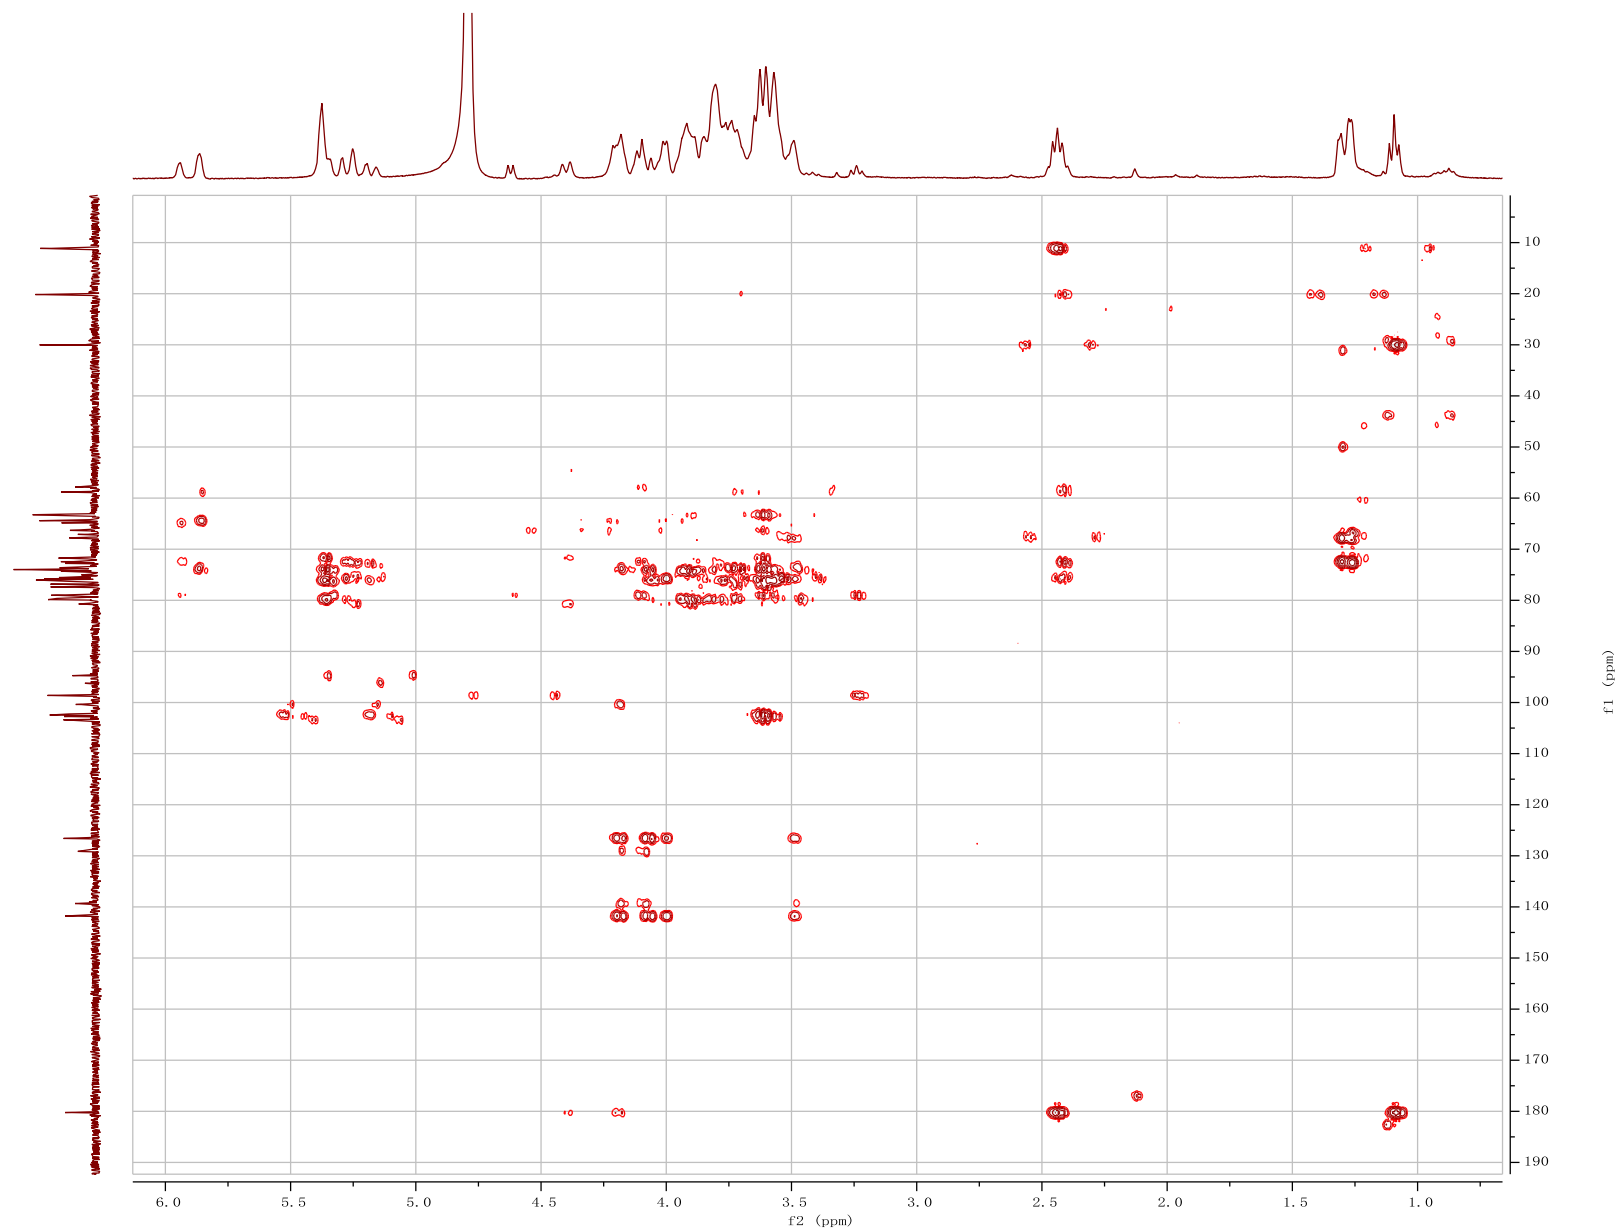

**Figure S108.** HMBC spectrum of compound **14** (500 MHz, D<sub>2</sub>O).

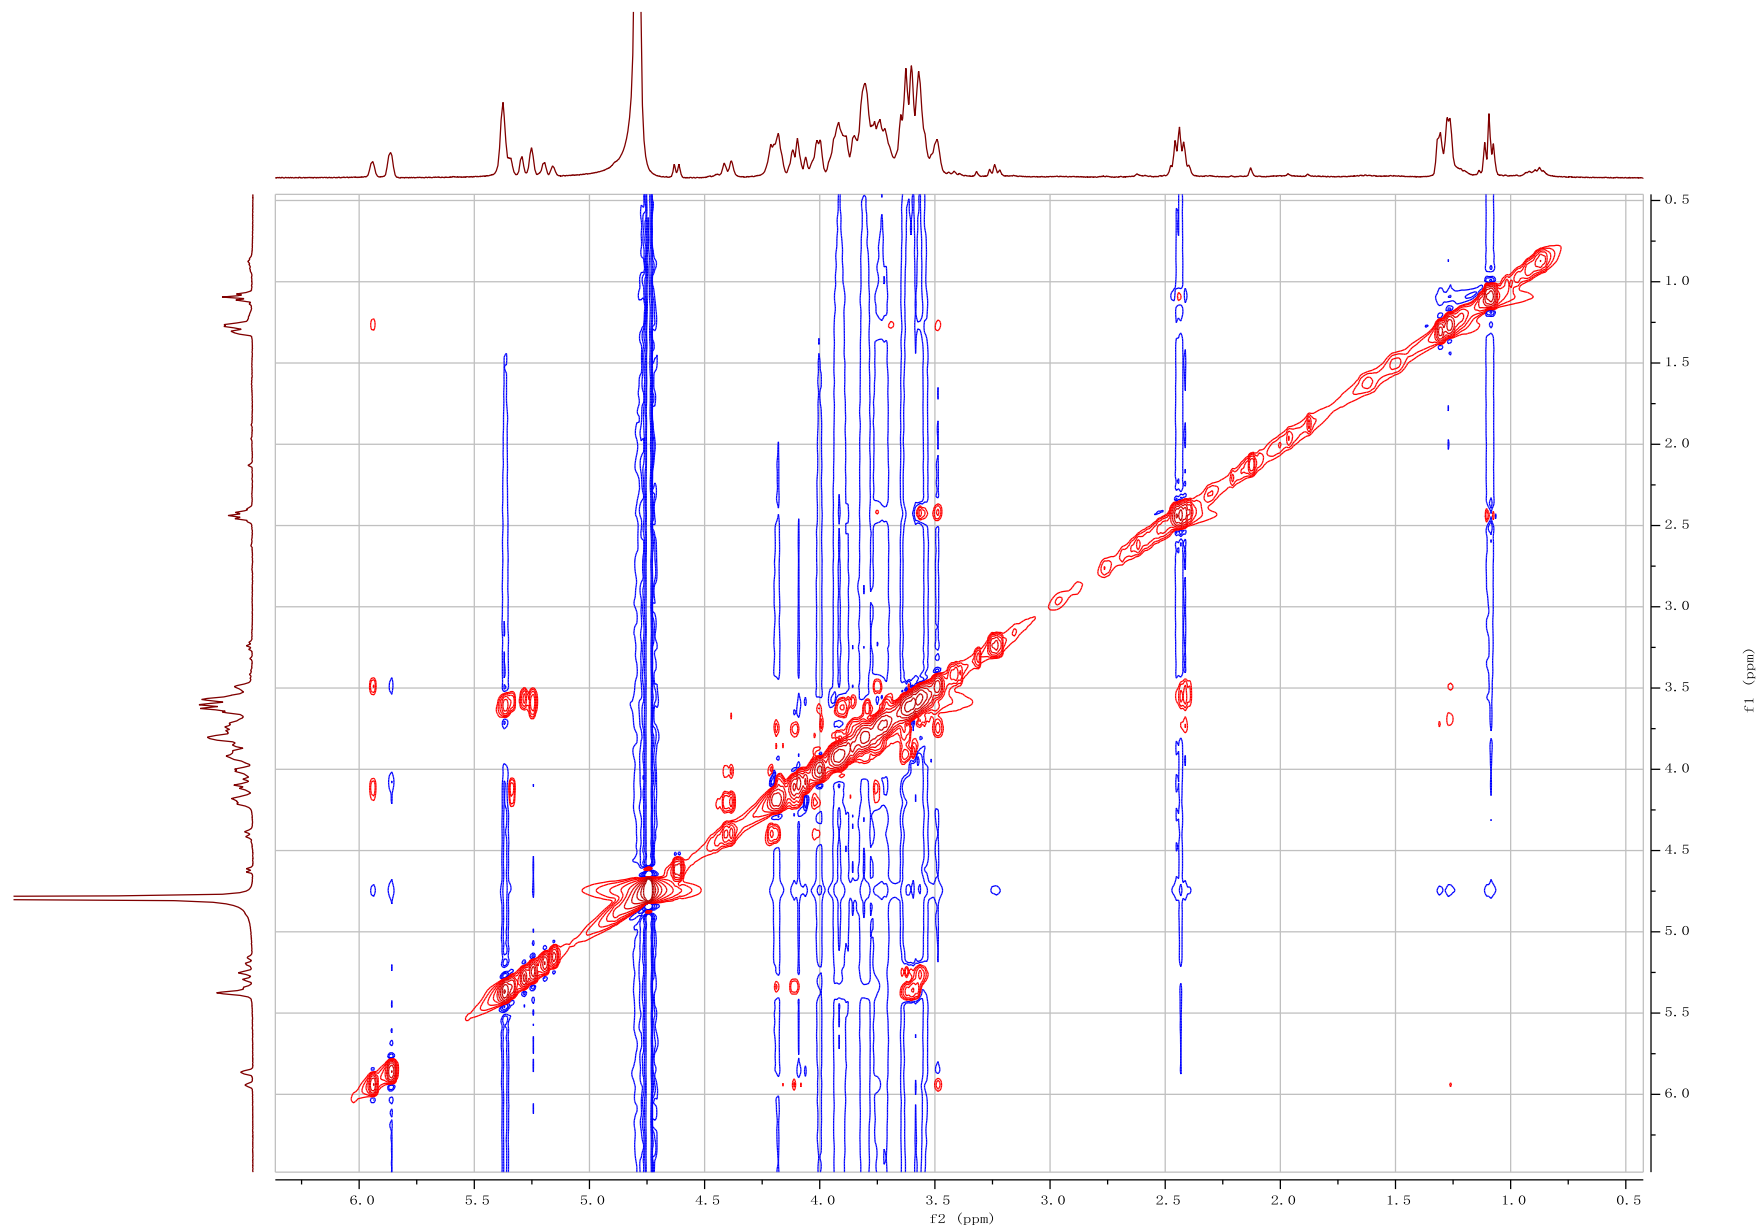

**Figure S109.** NOESY spectrum of compound **14** (500 MHz, D<sub>2</sub>O).

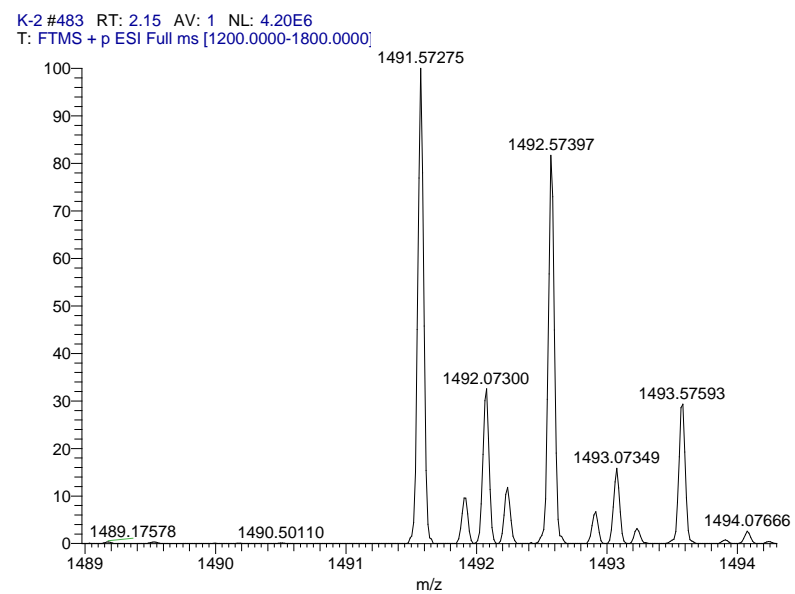

**Figure S110.** HRESIMS spectrum of compound **14**.

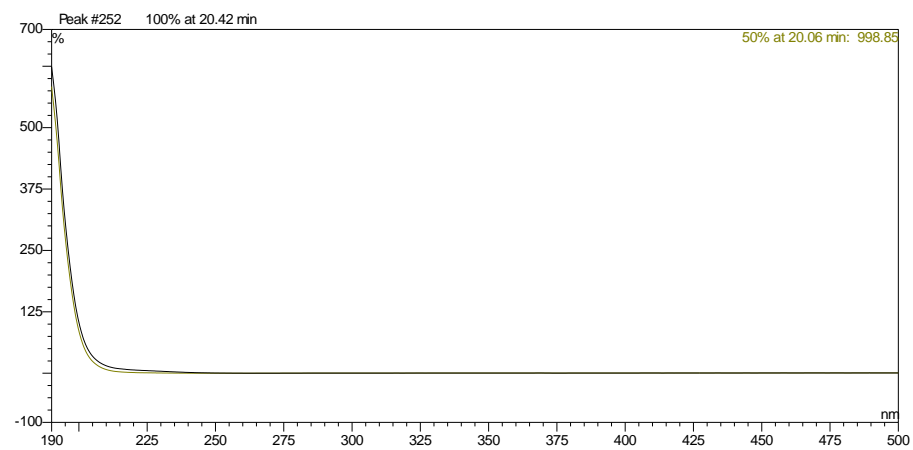

**Figure S111.** UV spectrum of compound **14**.

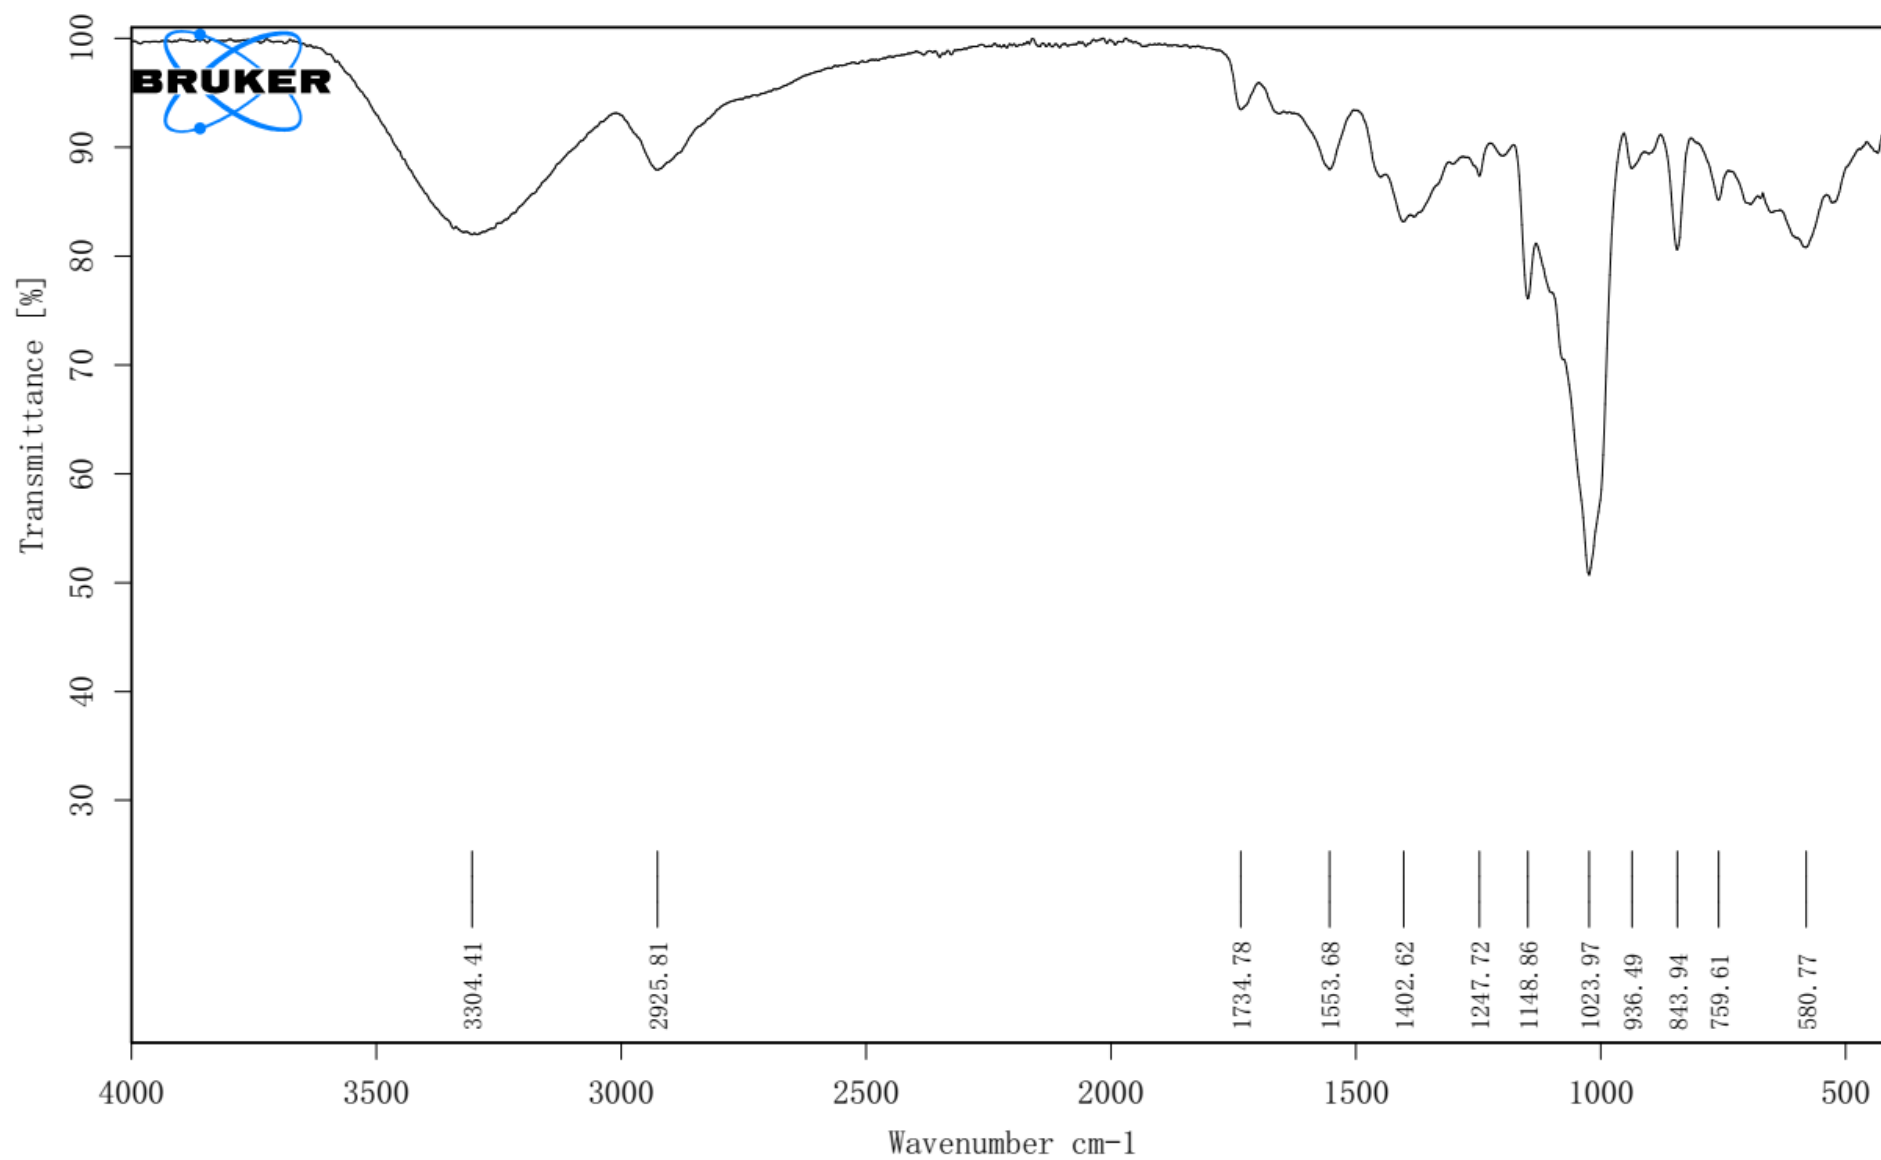

**Figure S112.** IR spectrum of compound **14**.

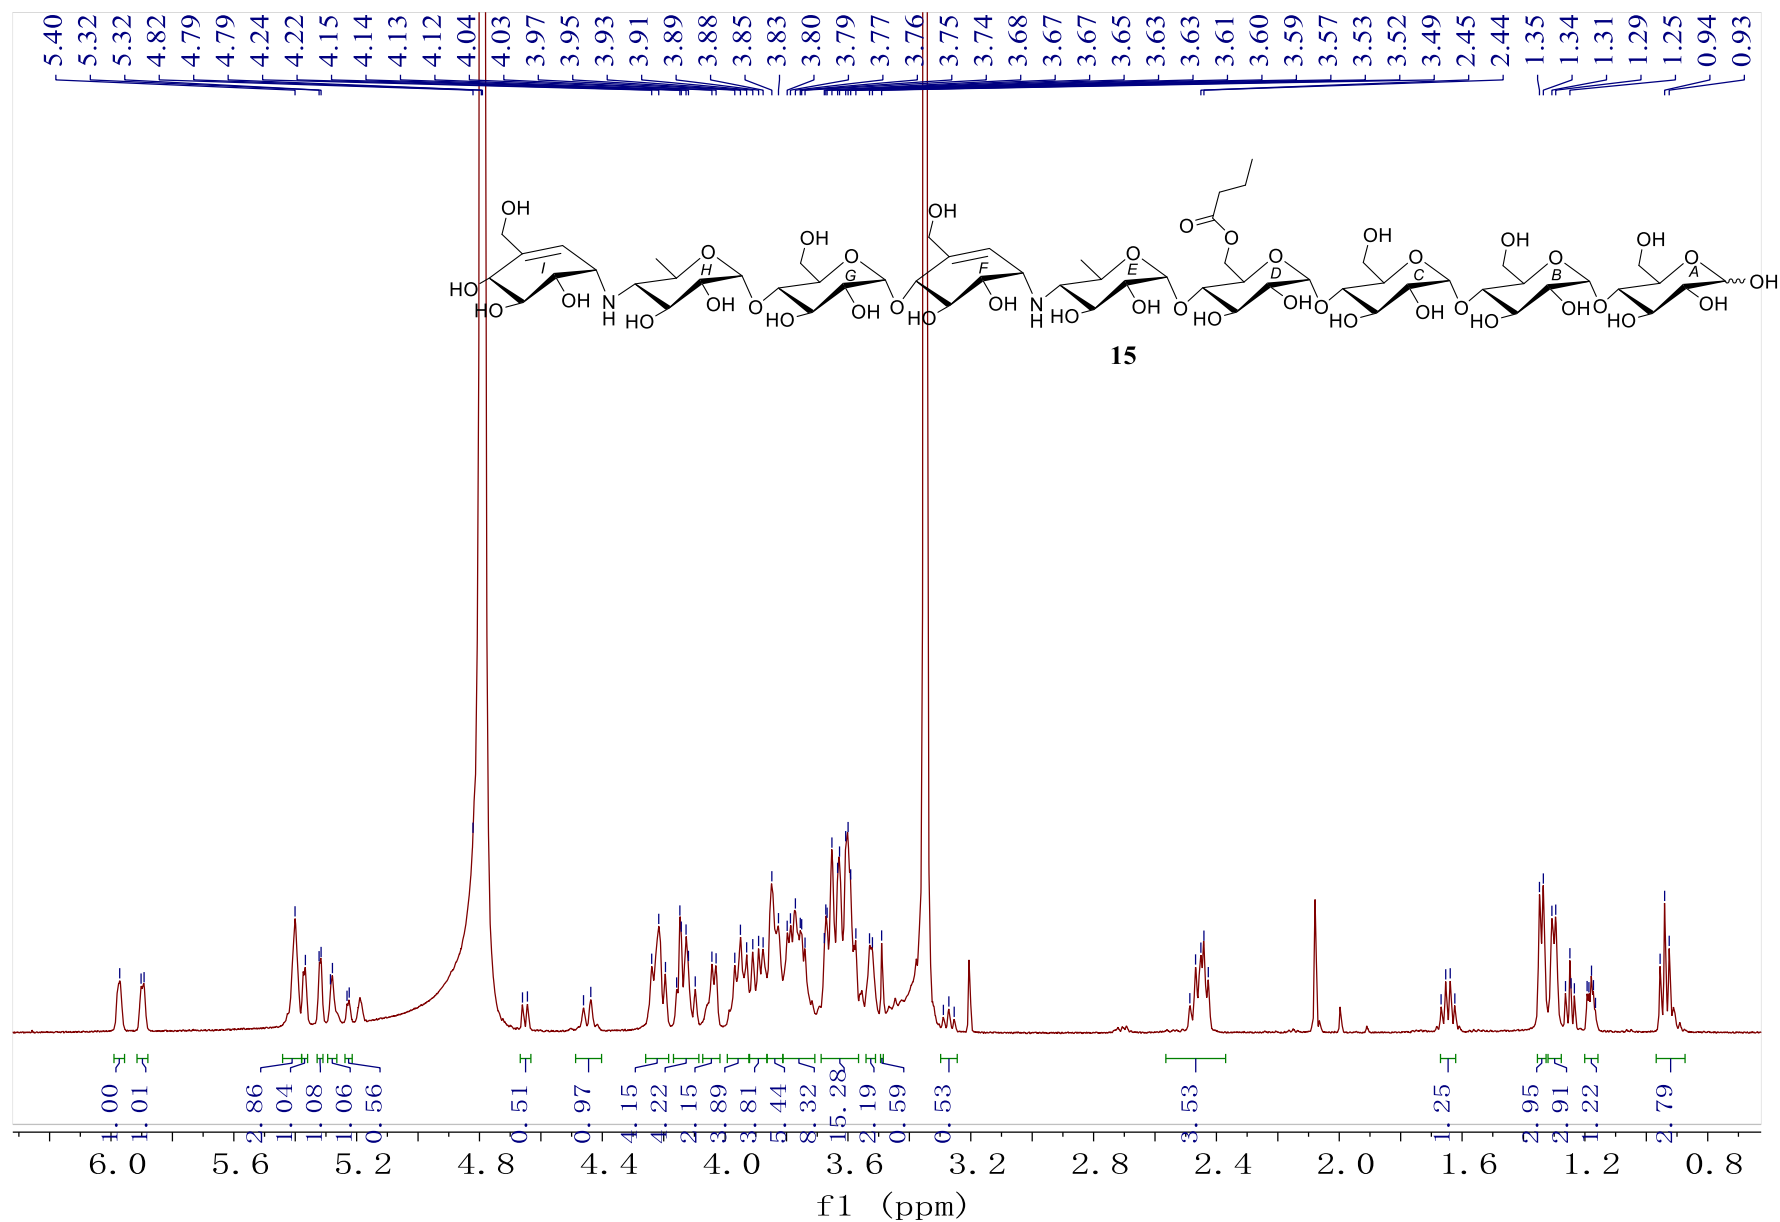

**Figure S113.**  $^1\text{H}$  NMR spectrum of compound **15** (500 MHz,  $\text{D}_2\text{O}$ ). 137

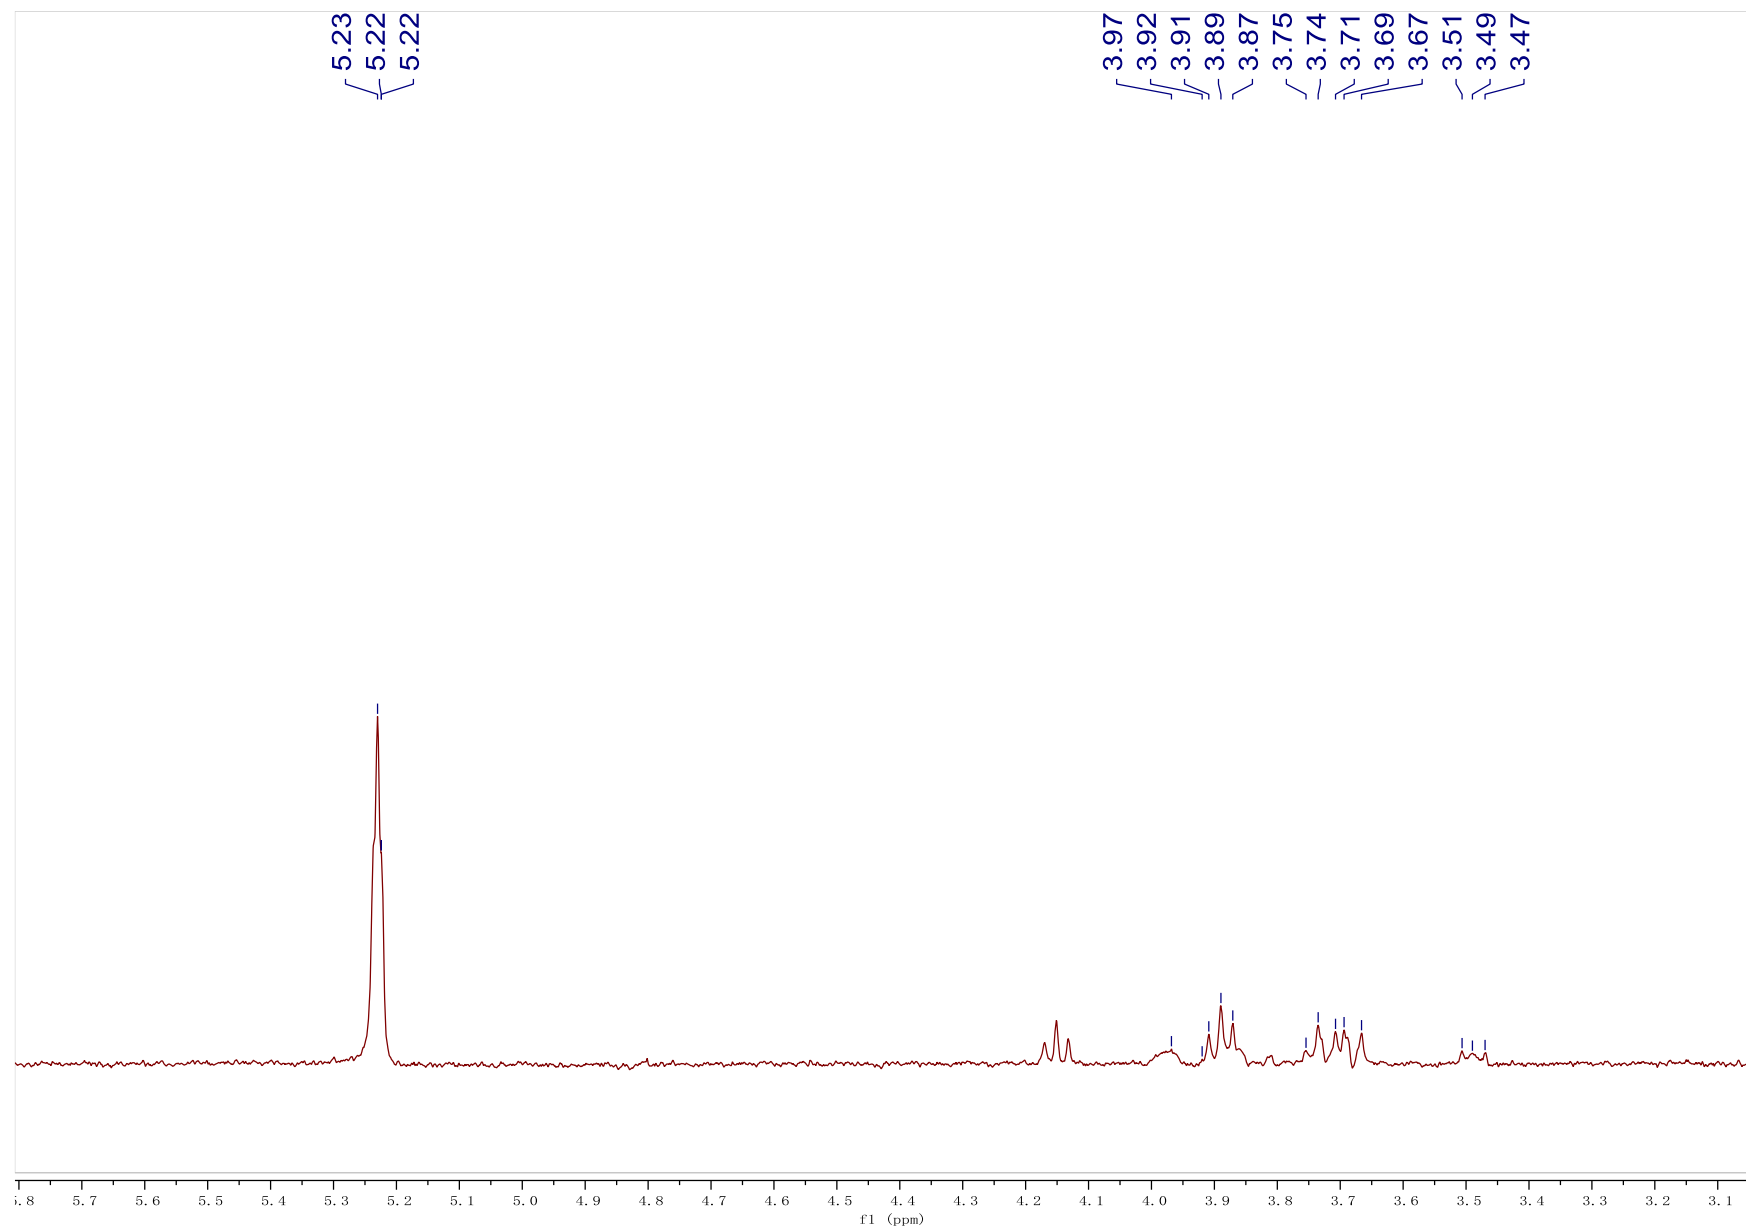

**Figure S114.** 1D-selective TOCSY spectrum of compound **15** (500 MHz, D<sub>2</sub>O, excitation at  $\delta$  5.23, H-A1 $\alpha$ ).

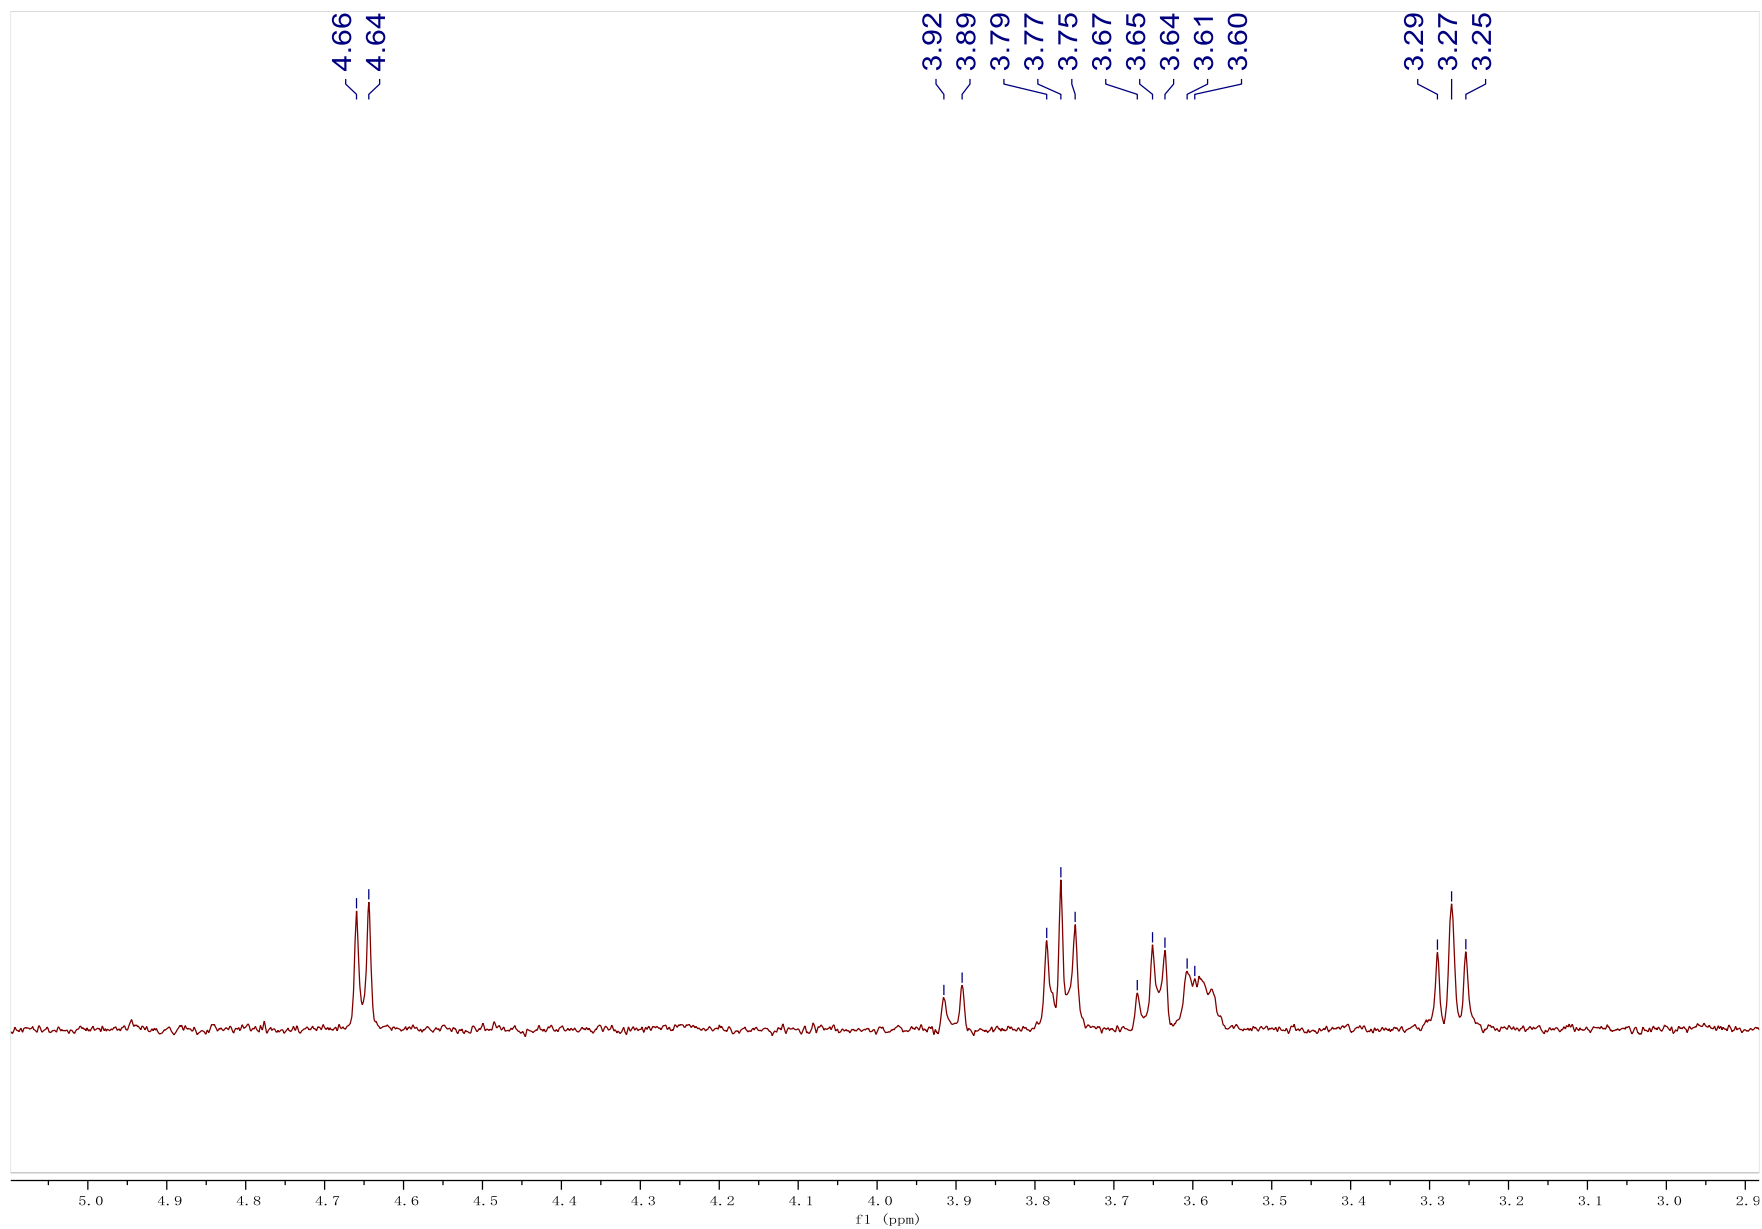

**Figure S115.** 1D-selective TOCSY spectrum of compound **15** (500 MHz, D<sub>2</sub>O, excitation at  $\delta$  4.65, H-A1 $\beta$ ).

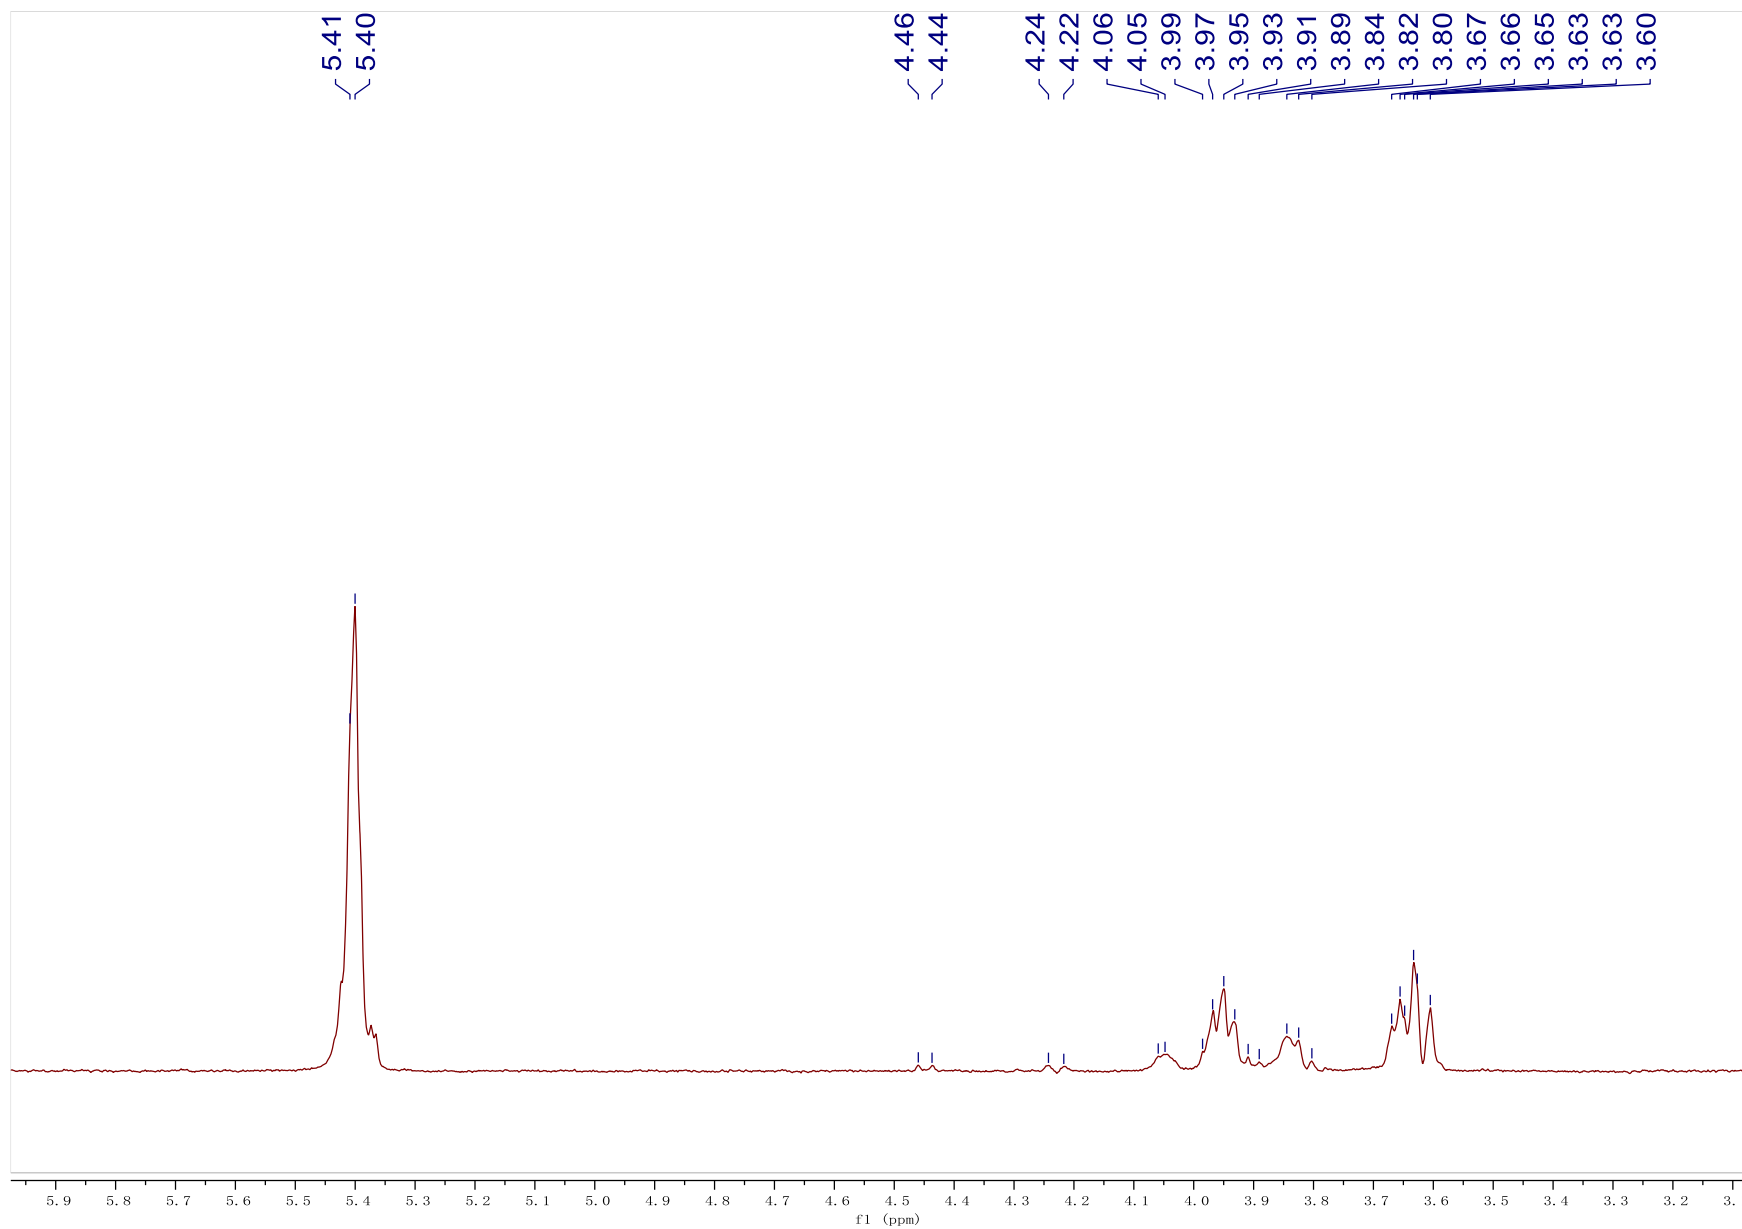

**Figure S116.** 1D-selective TOCSY spectrum of compound **15** (500 MHz, D<sub>2</sub>O, excitation at  $\delta$  5.40, H-B1, C1, and D1).



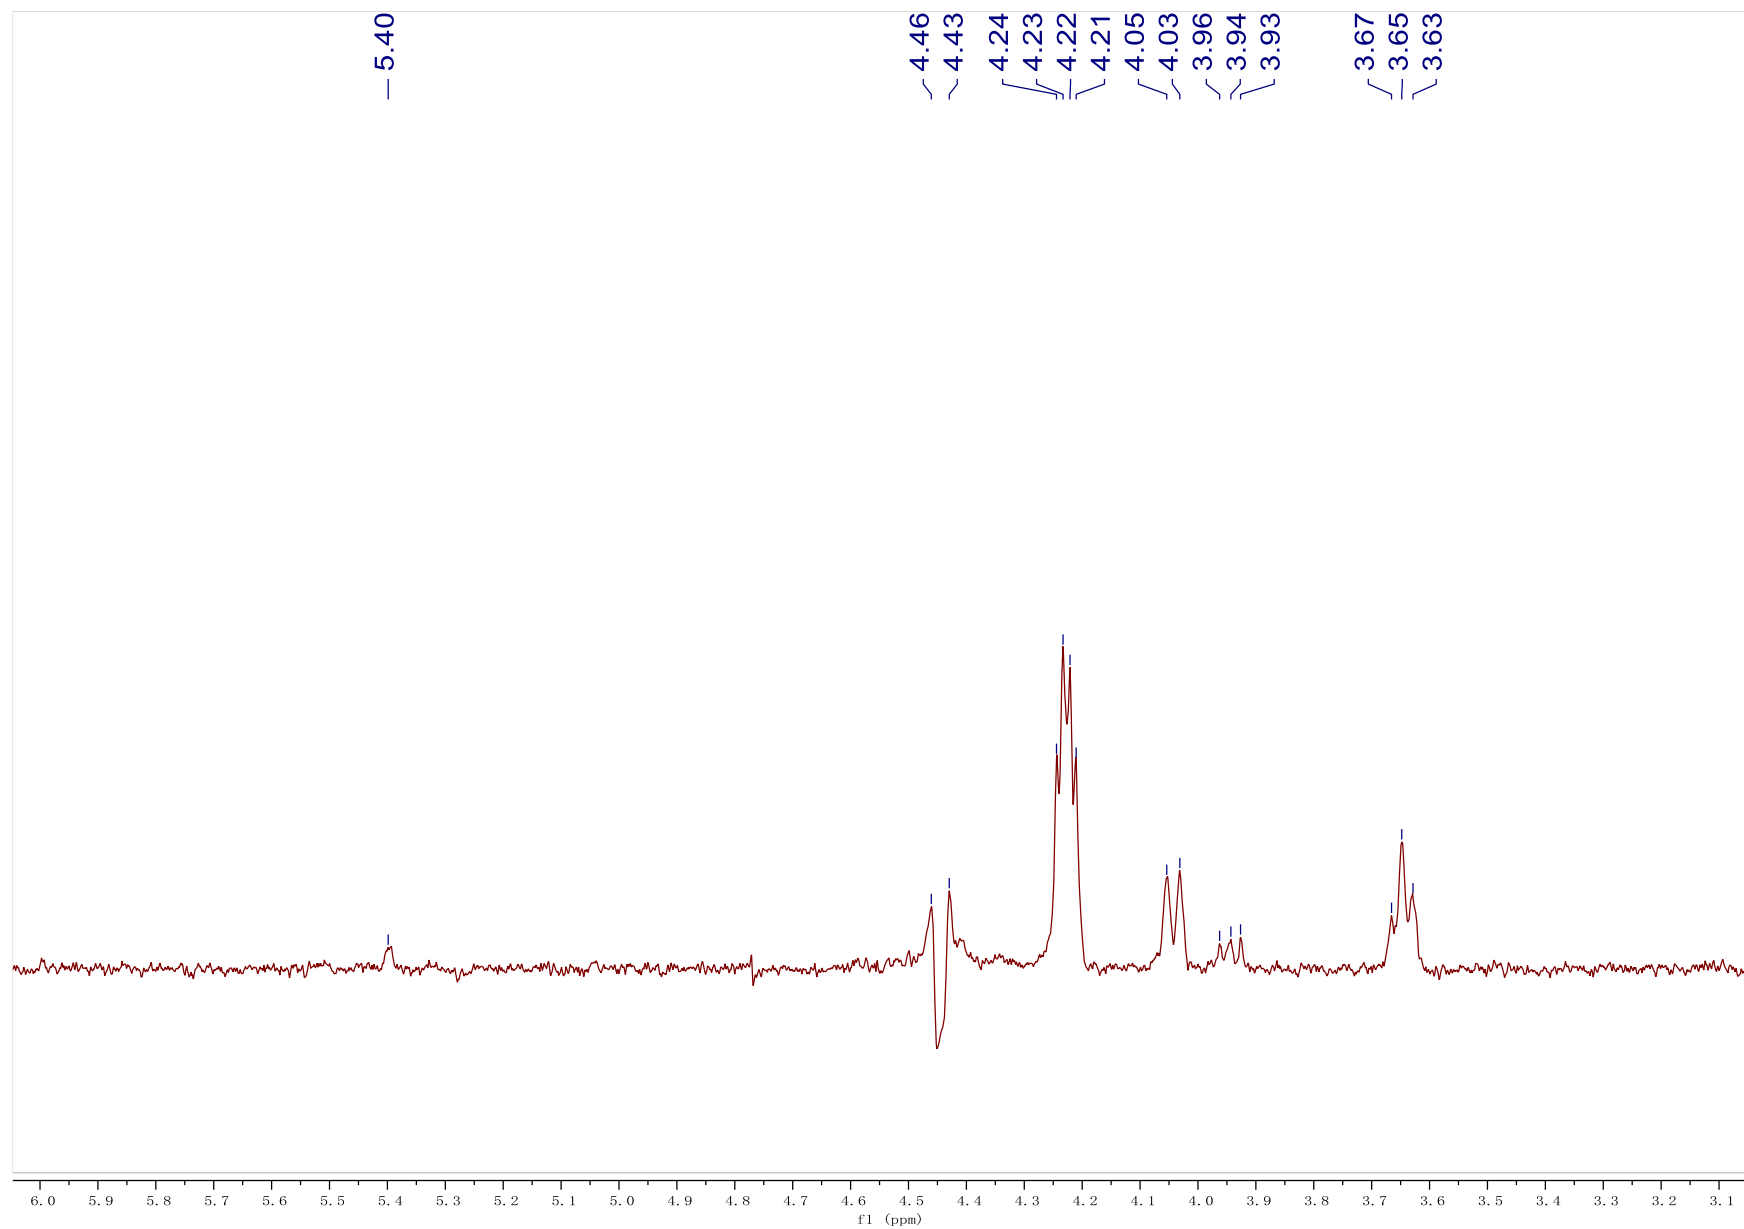

**Figure S117.** 1D-selective TOCSY spectrum of compound **15** (500 MHz, D<sub>2</sub>O, excitation at  $\delta$  4.45, H-D6a).

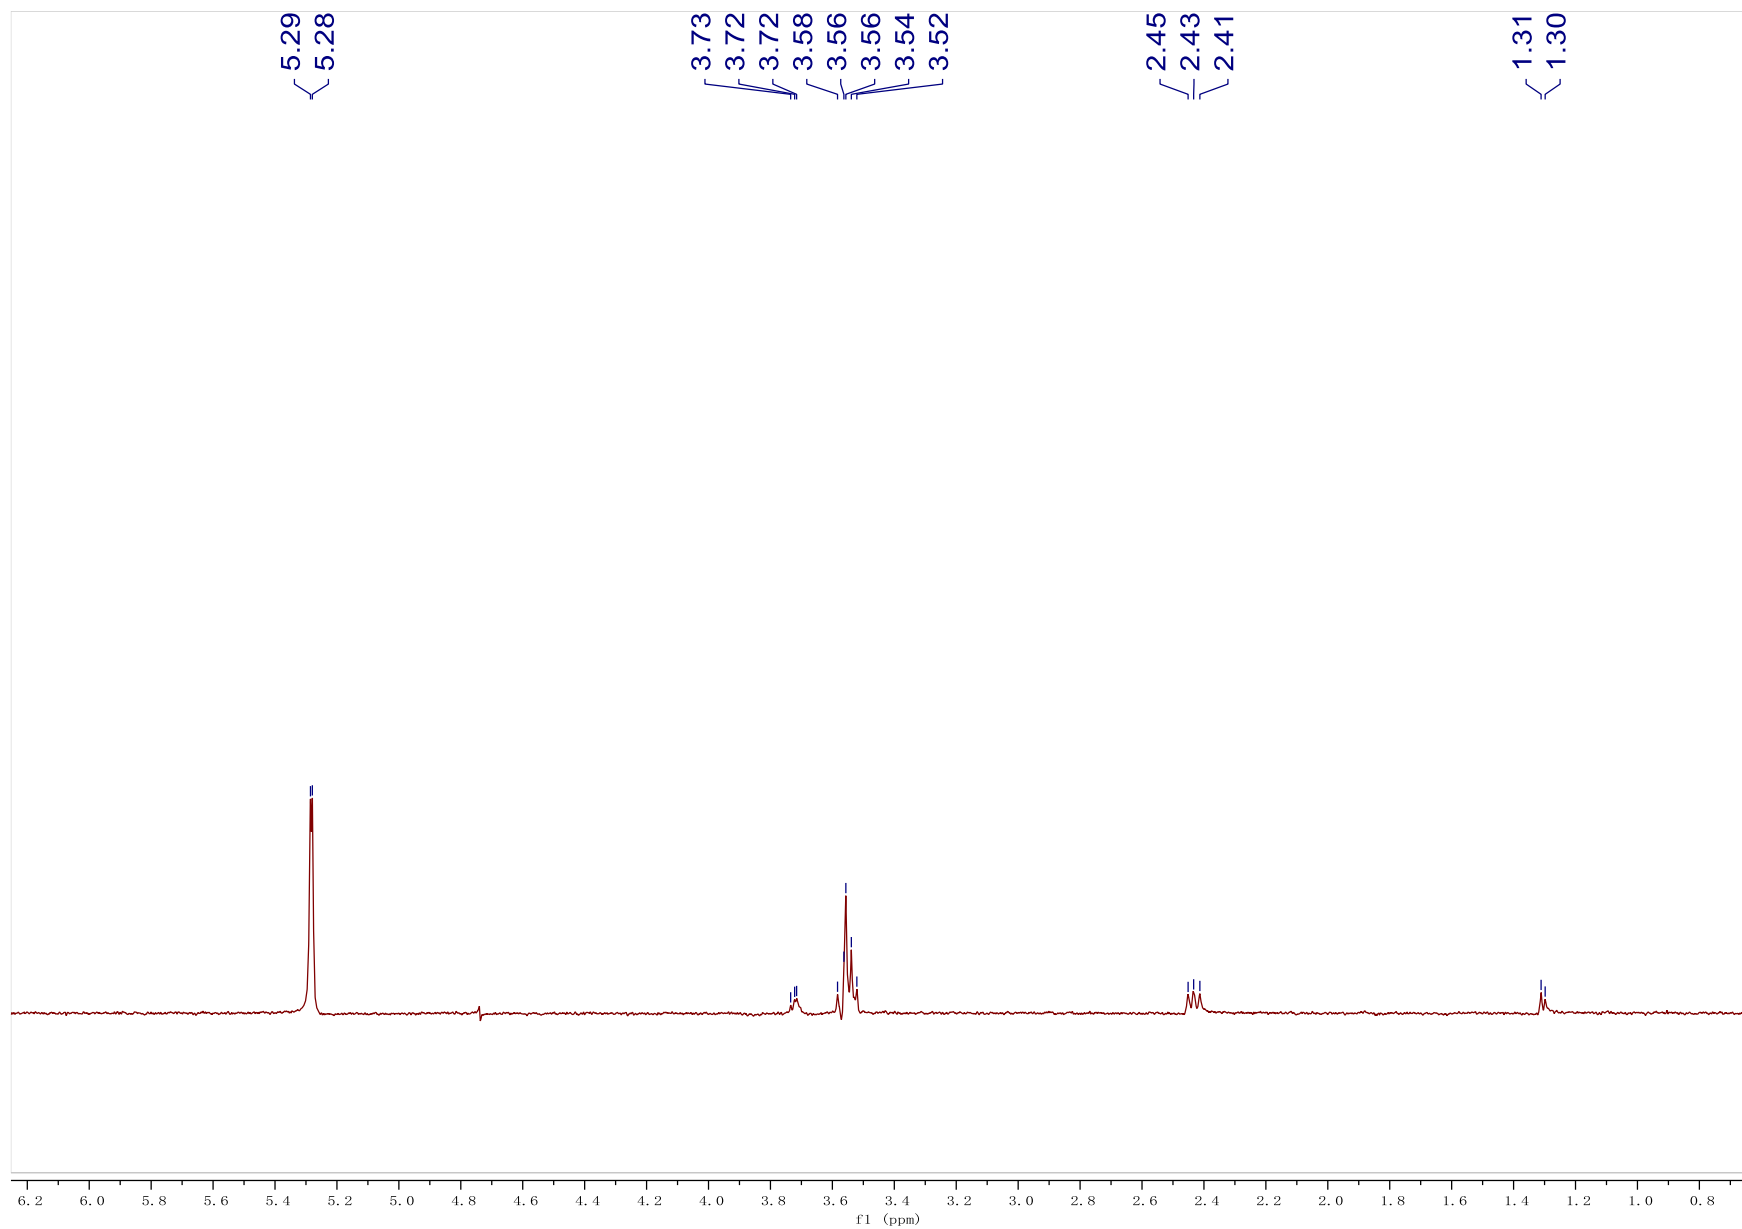

**Figure S118.** 1D-selective TOCSY spectrum of compound **15** (500 MHz, D<sub>2</sub>O, excitation at  $\delta$  5.28, H-E1).

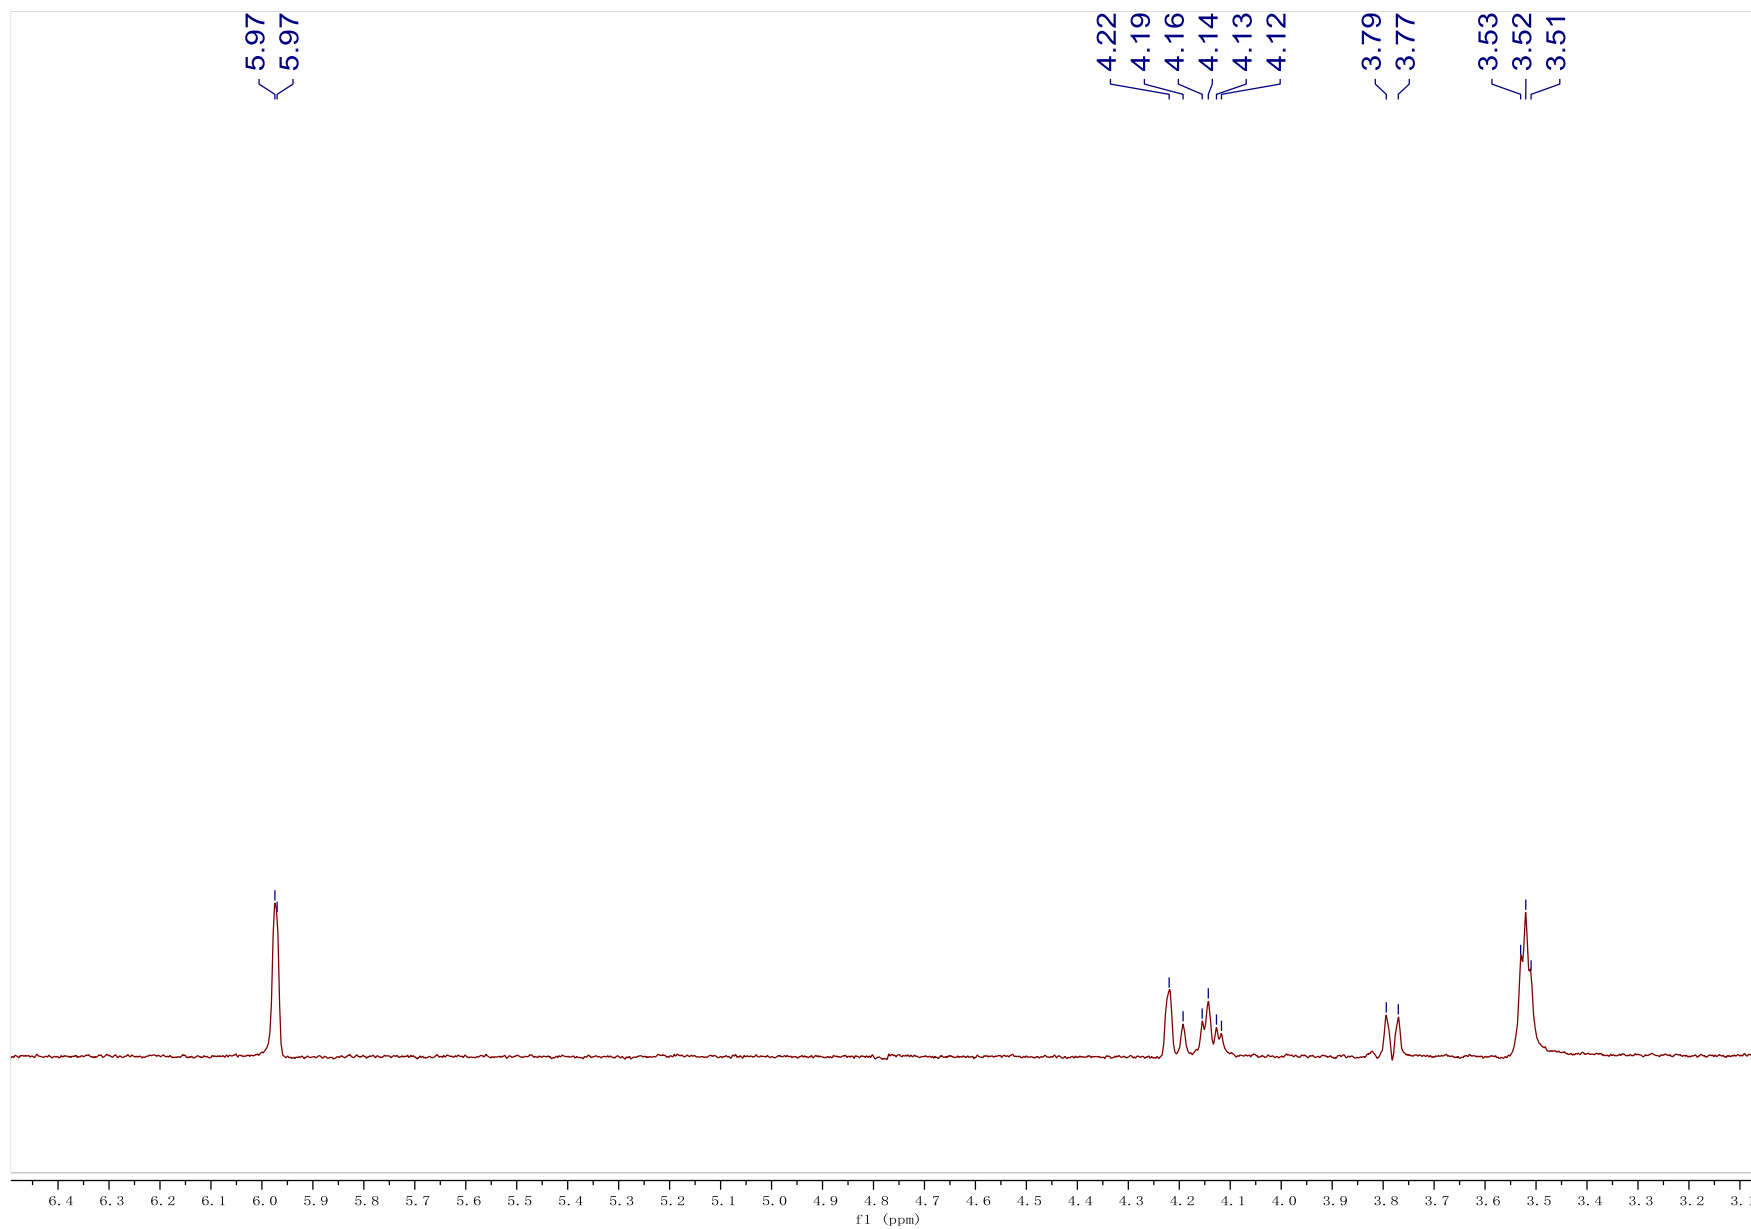

**Figure S119.** 1D-selective TOCSY spectrum of compound **15** (500 MHz, D<sub>2</sub>O, excitation at  $\delta$  5.97, H-F1).

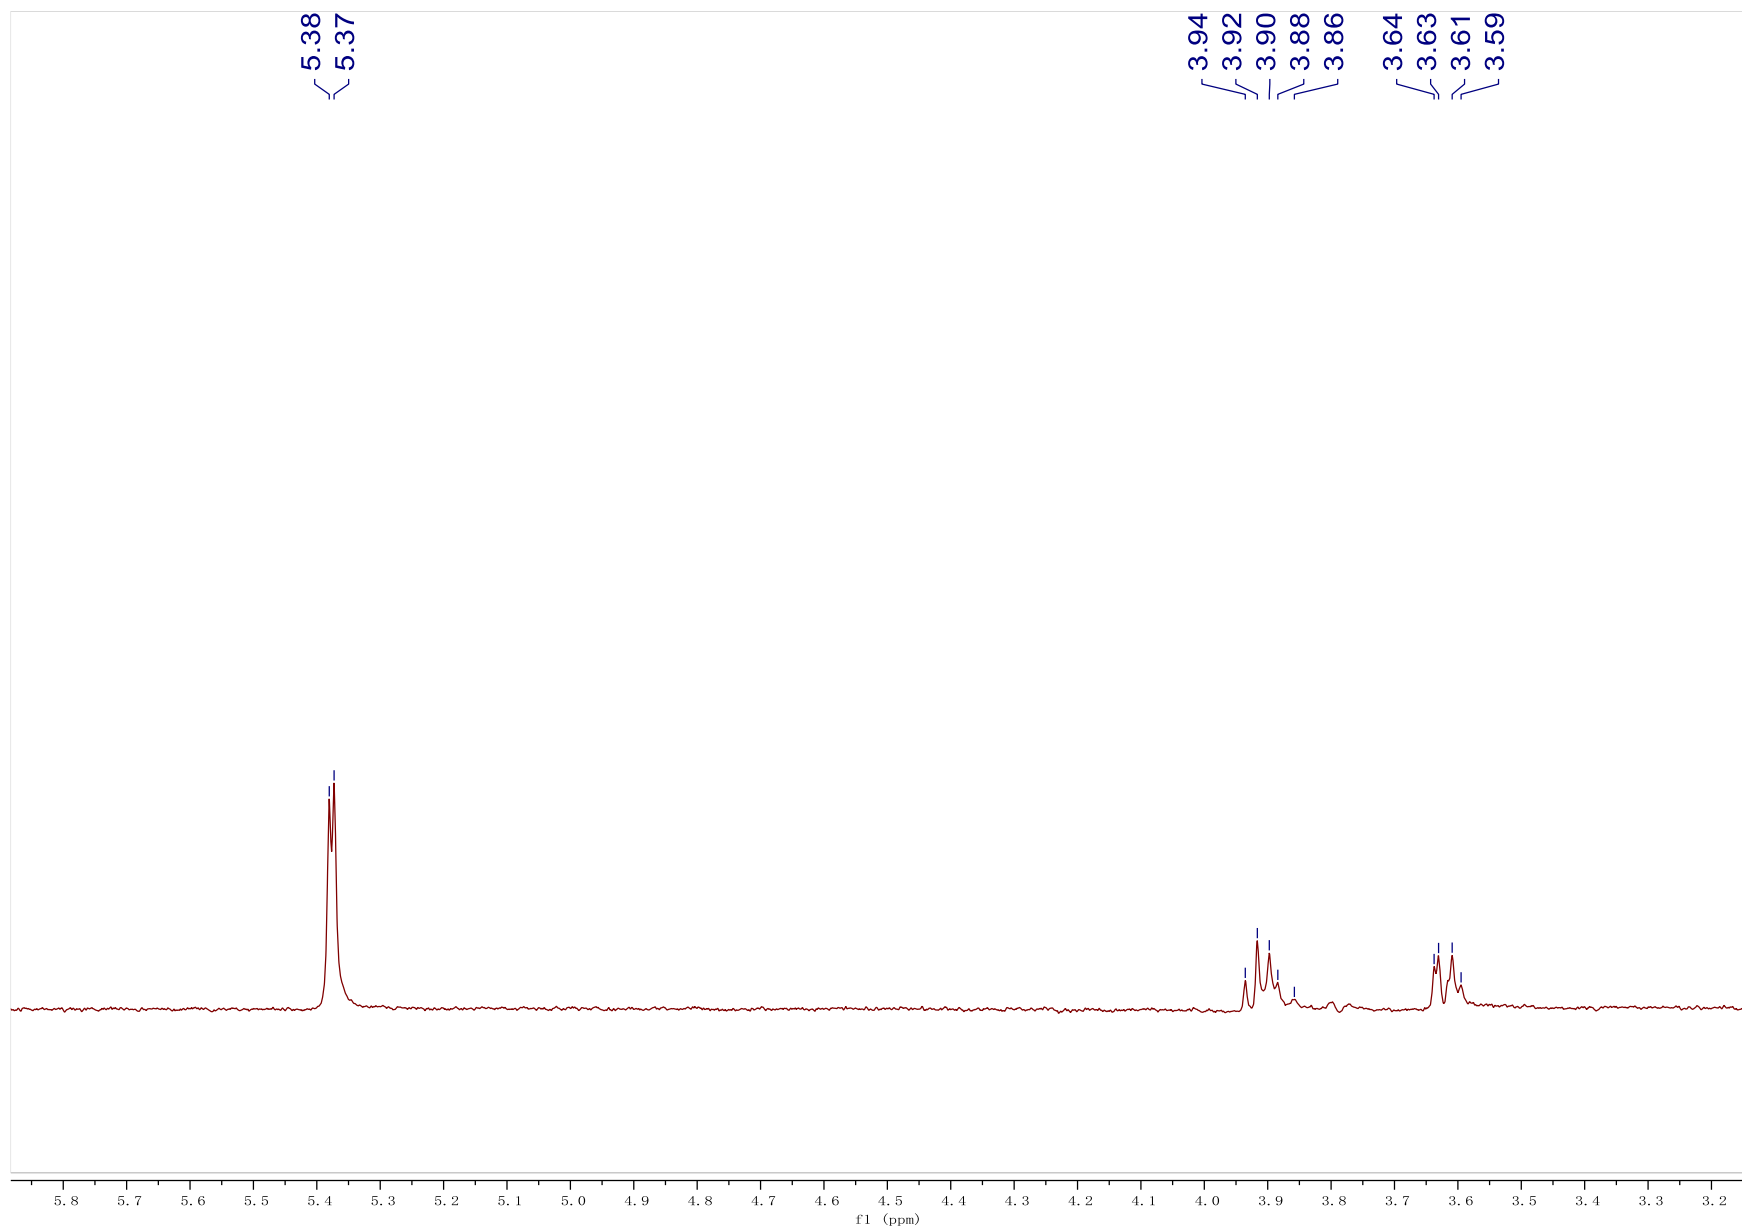

**Figure S120.** 1D-selective TOCSY spectrum of compound **15** (500 MHz, D<sub>2</sub>O, excitation at  $\delta$  5.37, H-G1).

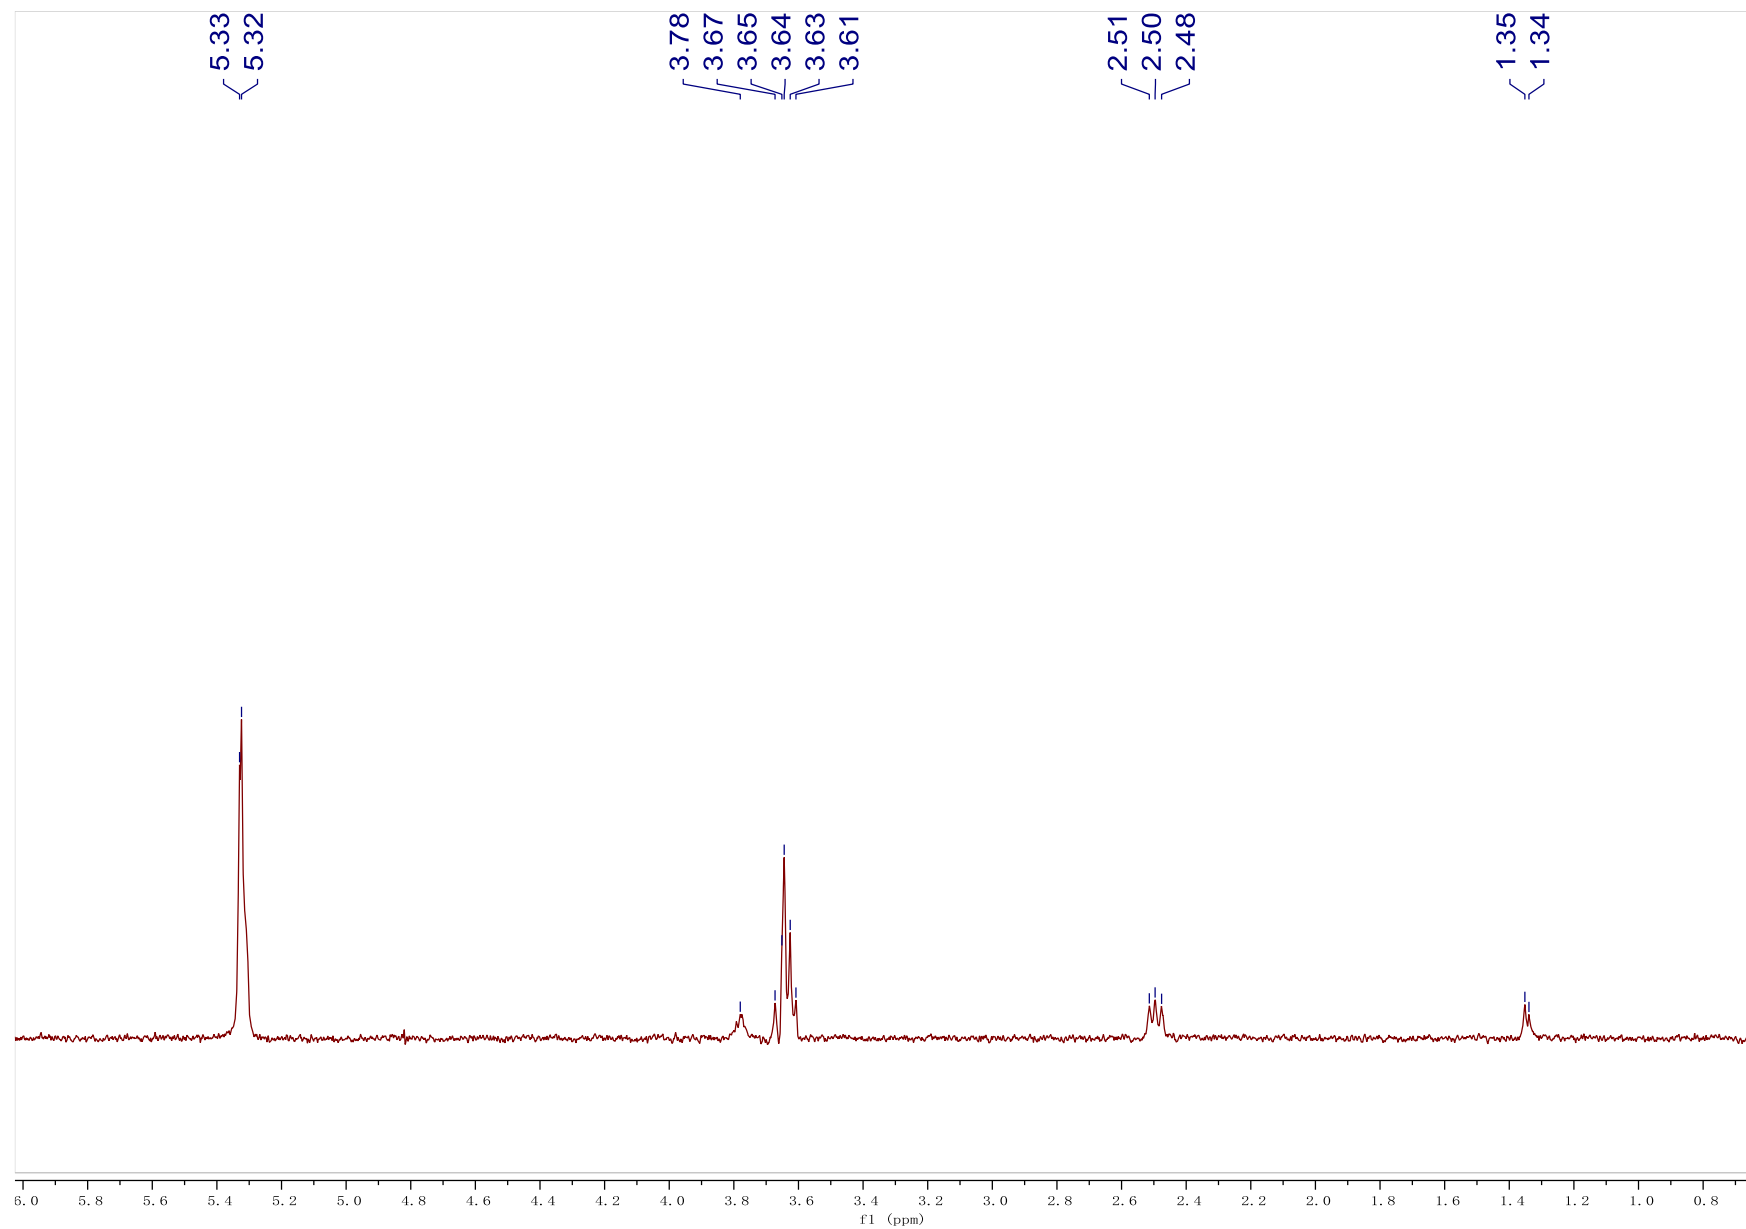

**Figure S121.** 1D-selective TOCSY spectrum of compound **15** (500 MHz, D<sub>2</sub>O, excitation at  $\delta$  5.32, H-**H1**).

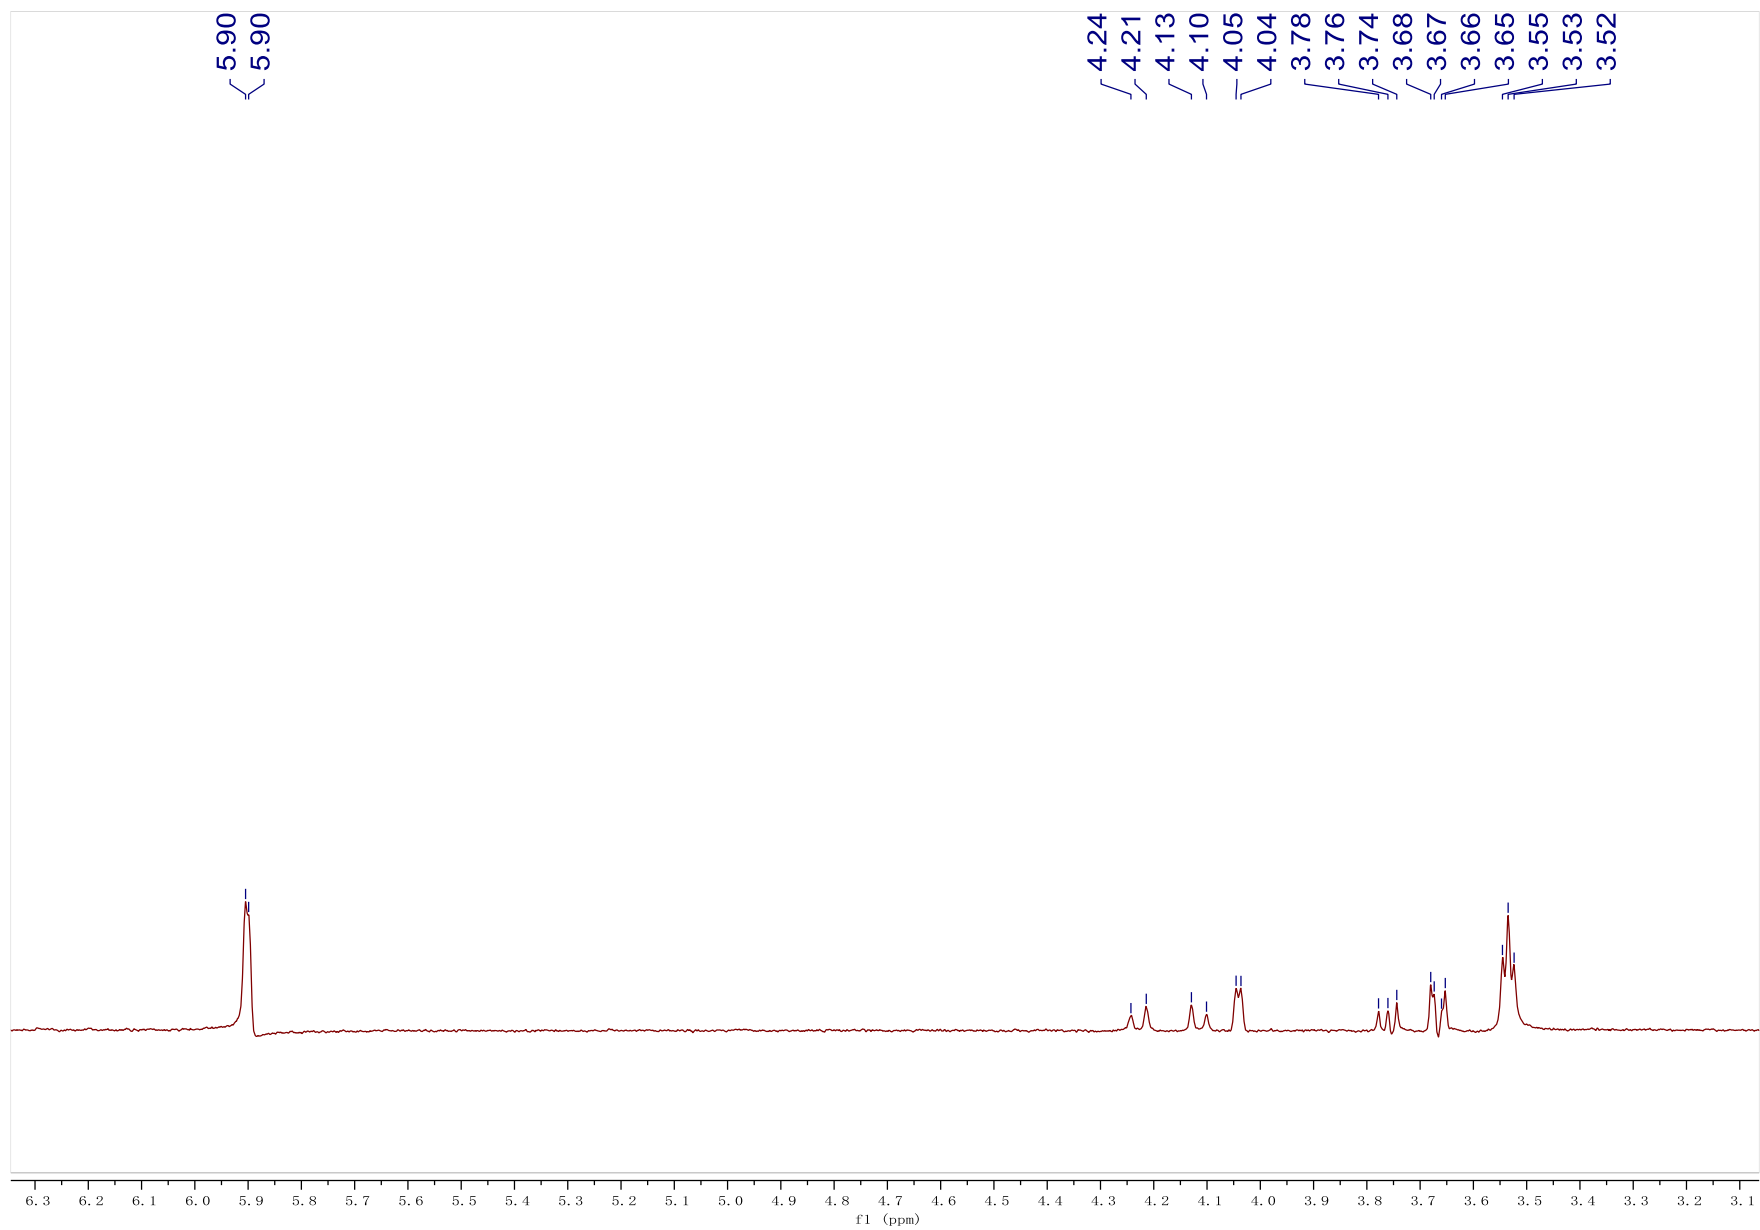

**Figure S122.** 1D-selective TOCSY spectrum of compound **15** (500 MHz, D<sub>2</sub>O, excitation at  $\delta$  5.90, H-I1).

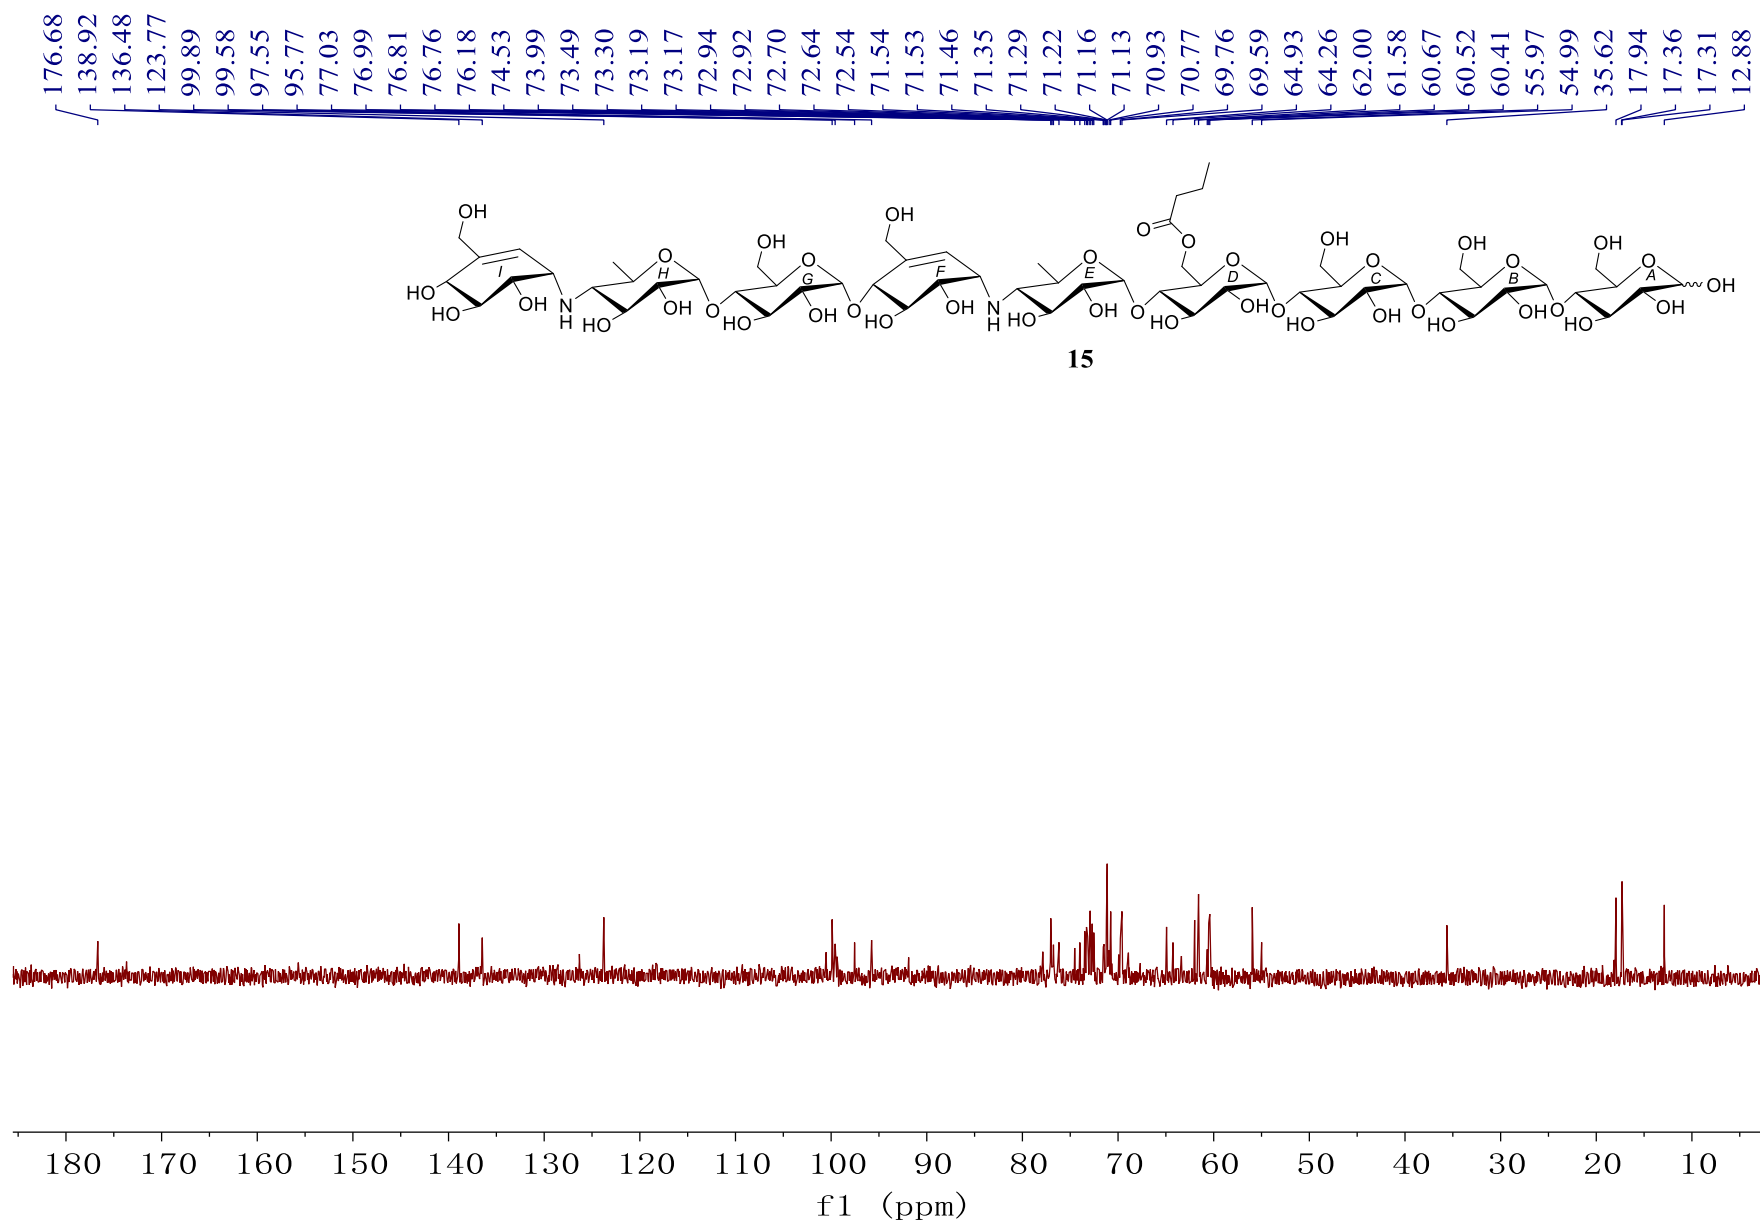

**Figure S123.**  $^{13}\text{C}$  NMR spectrum of compound **15** (125 MHz,  $\text{D}_2\text{O}$ ).

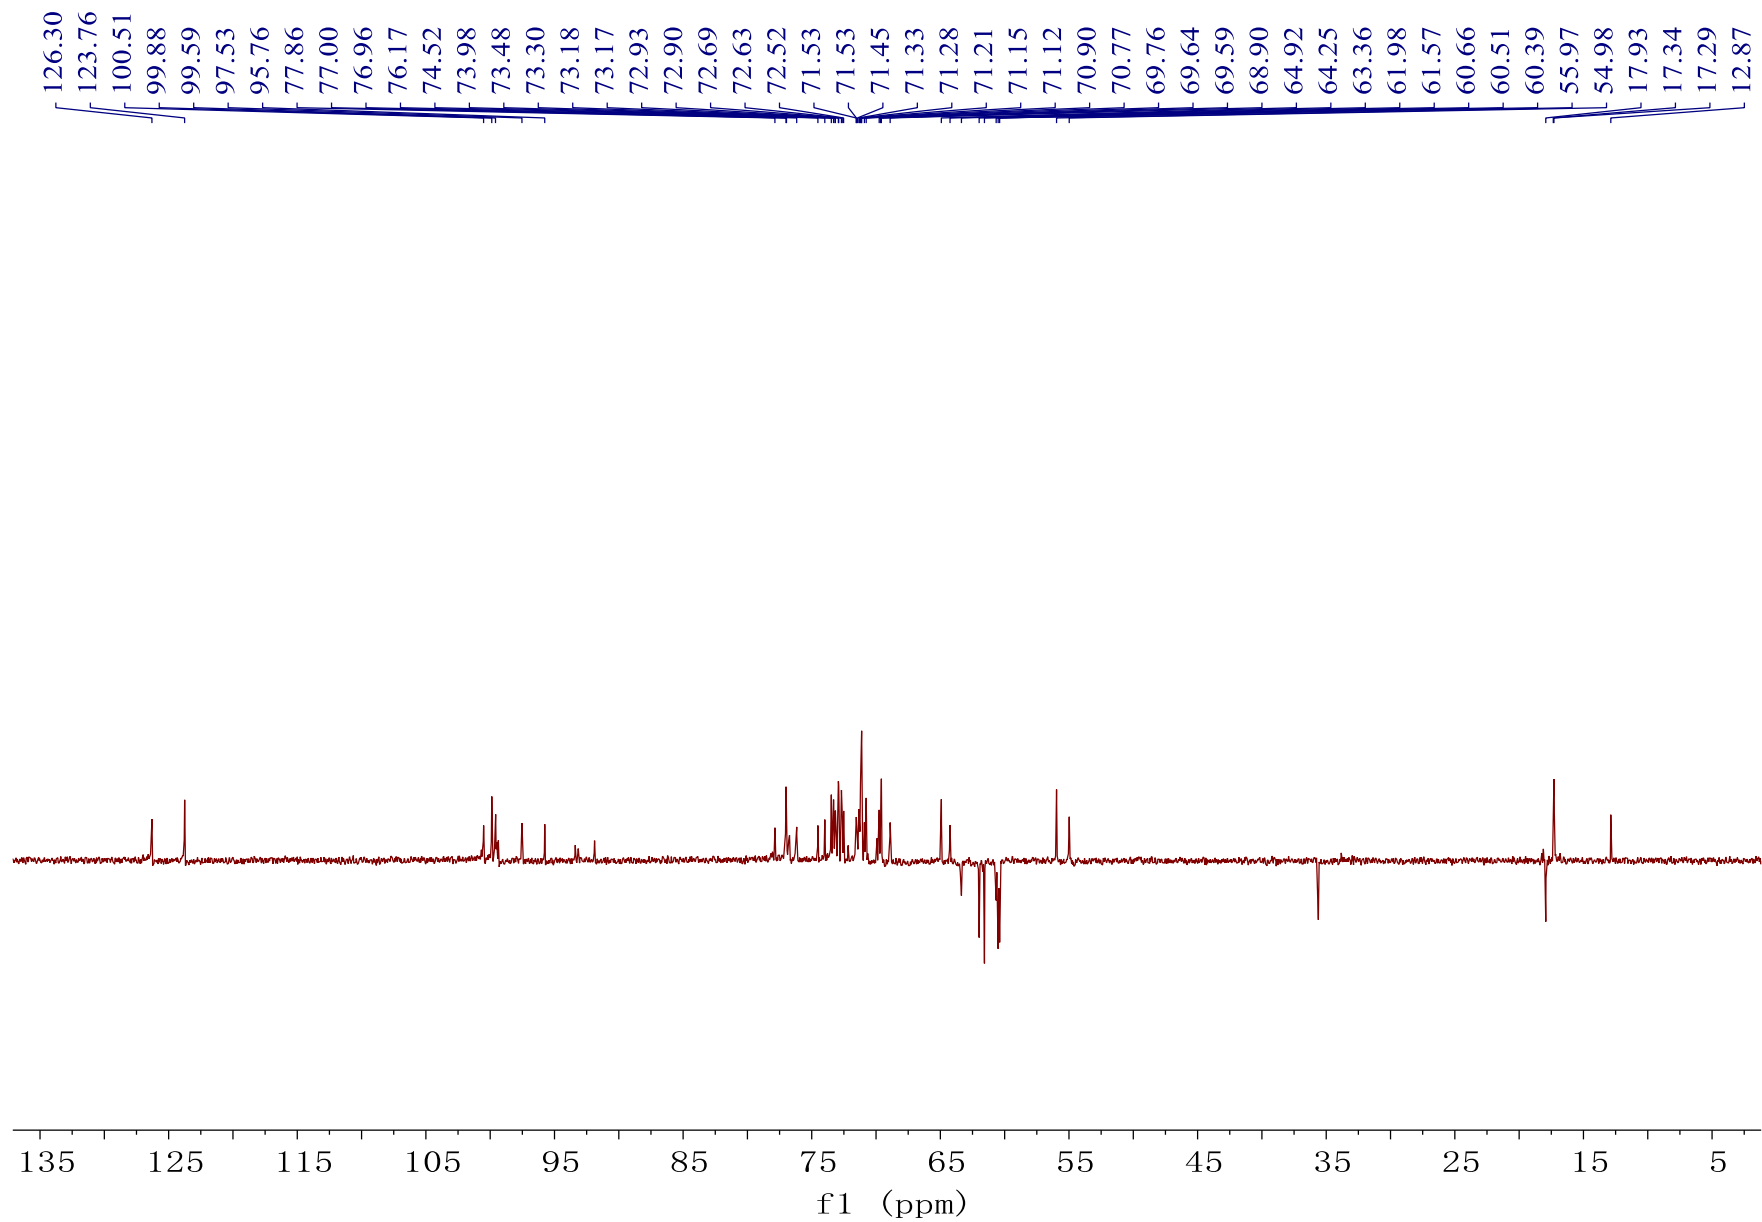

**Figure S124.** DEPT-135 spectrum of compound **15** (125 MHz, D<sub>2</sub>O).



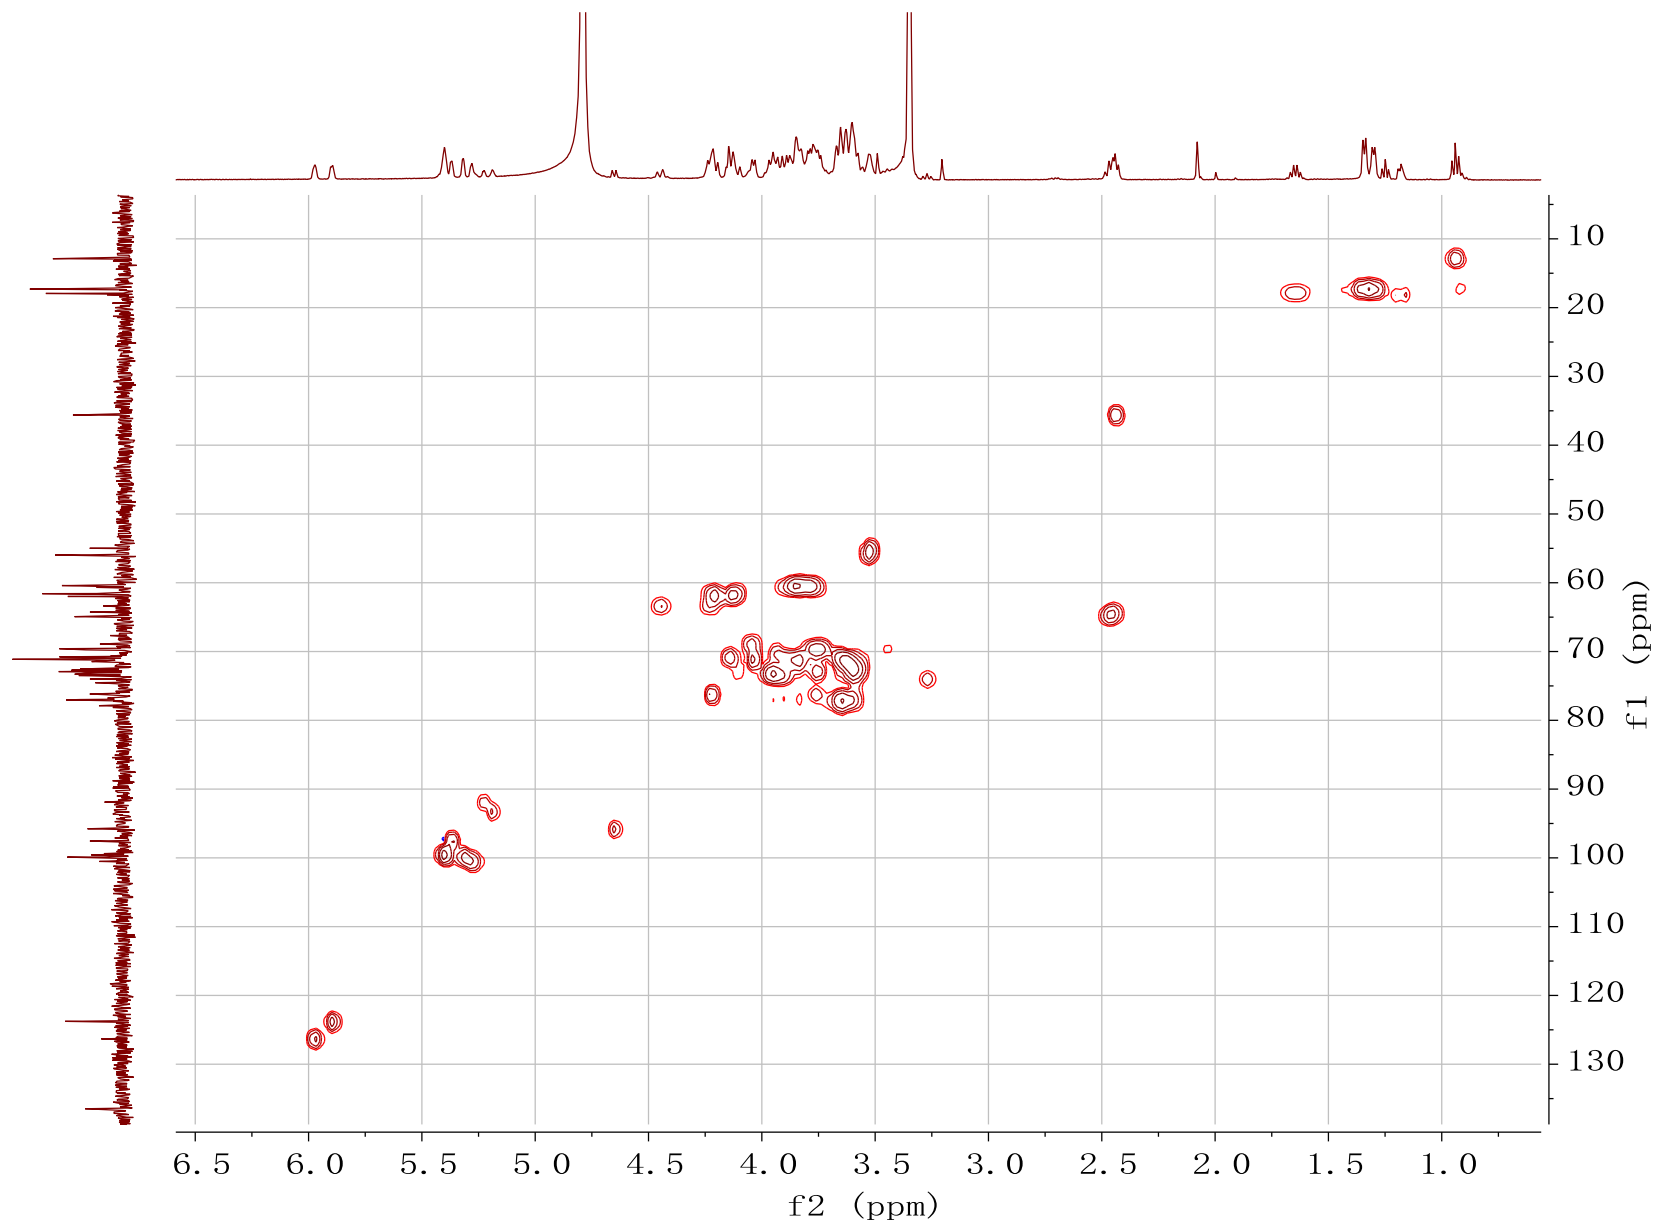

**Figure S125.** HSQC spectrum of compound **15** (500 MHz, D<sub>2</sub>O).

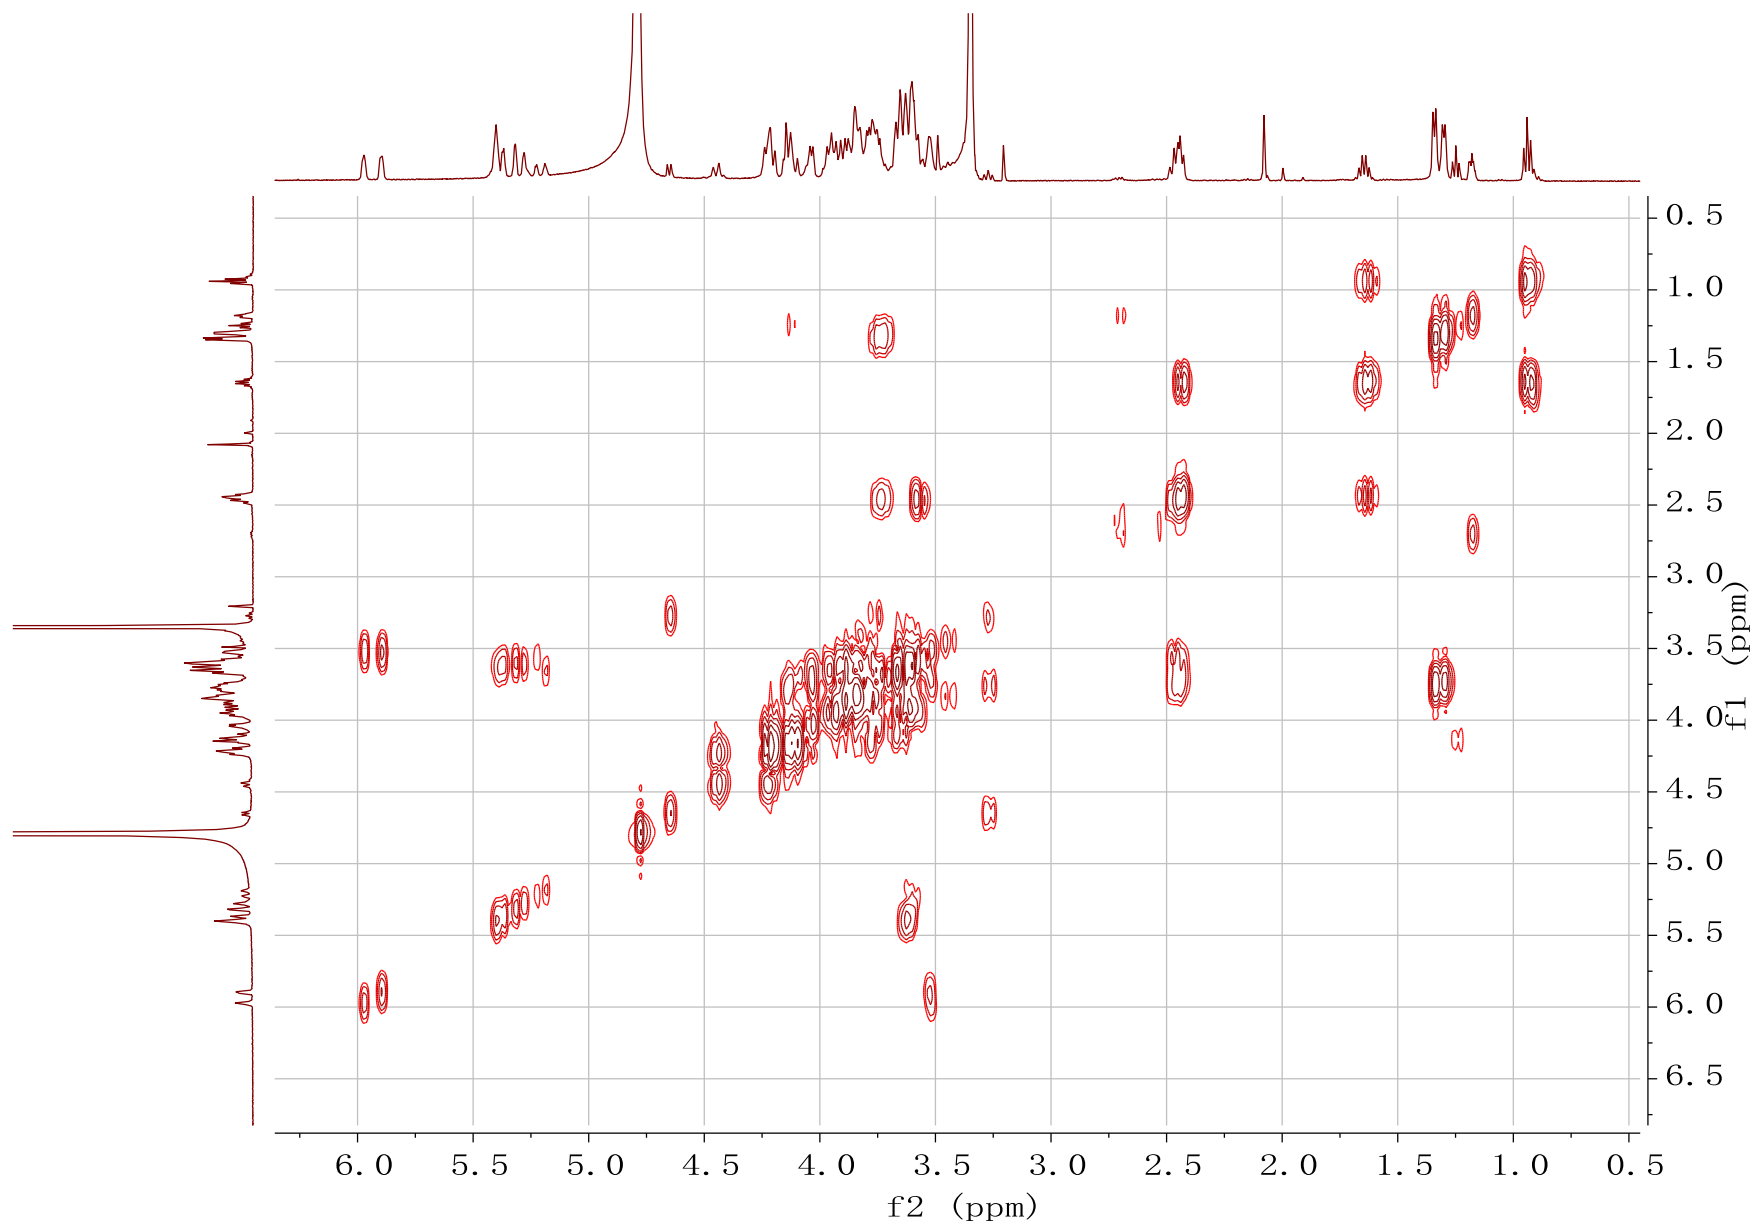

**Figure S126.**  $^1\text{H}$ - $^1\text{H}$  COSY spectrum of compound **15** (500 MHz,  $\text{D}_2\text{O}$ ).

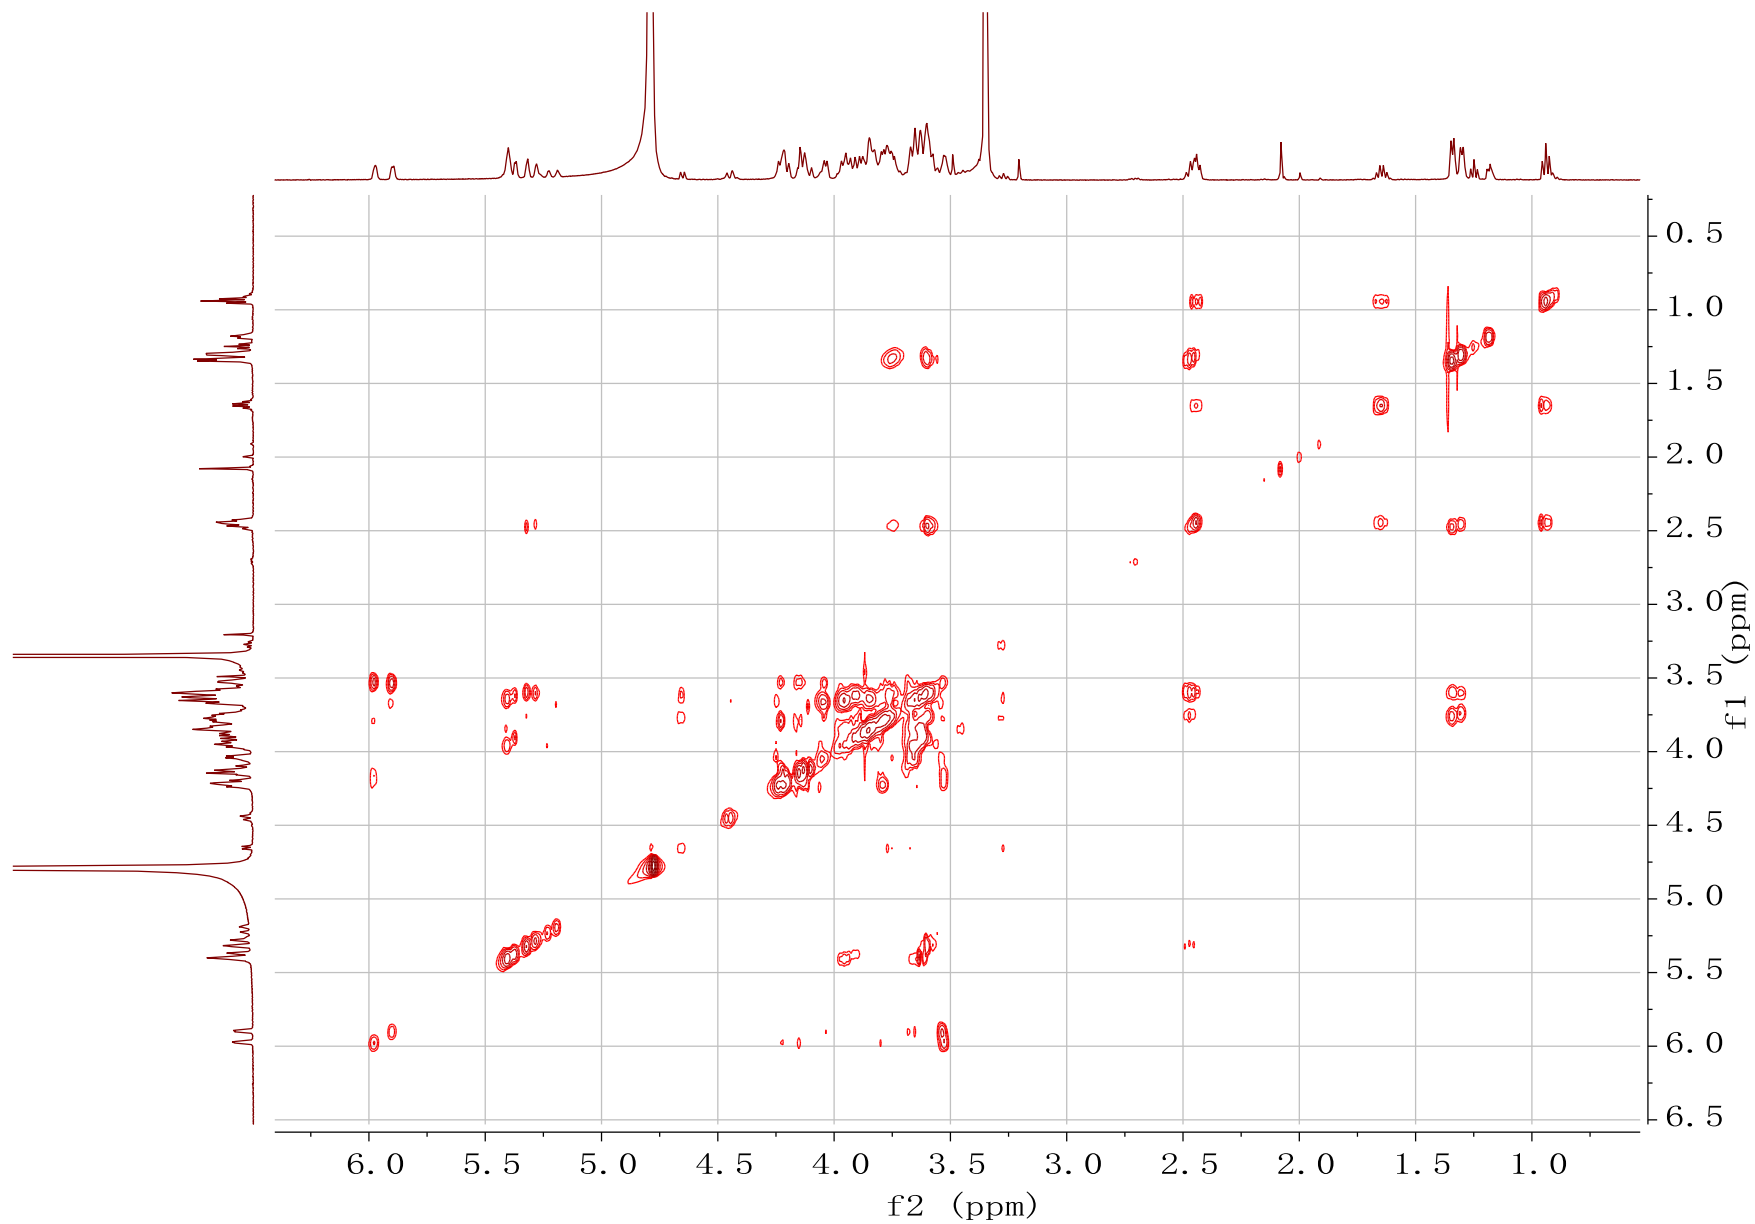

**Figure S127.** 2D-TOCSY spectrum of compound **15** (500 MHz, D<sub>2</sub>O).

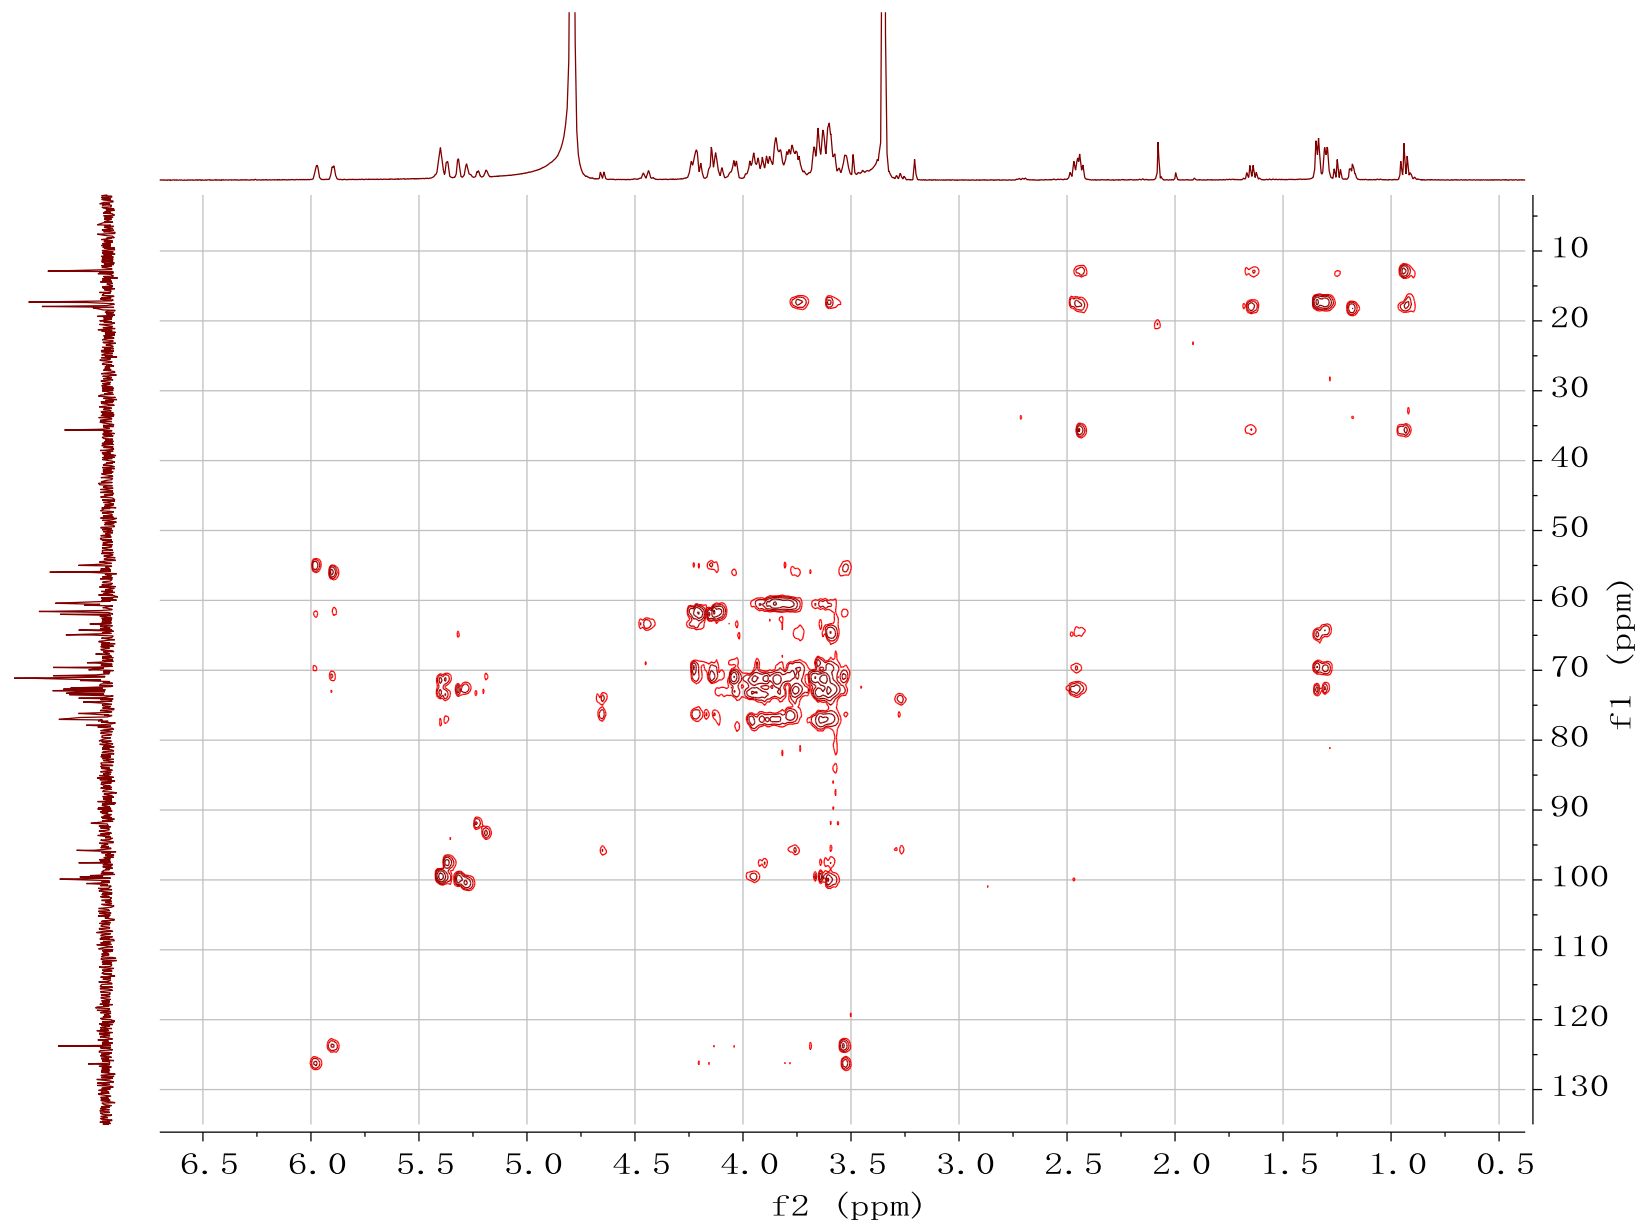

**Figure S128.** HSQC-TOCSY spectrum of compound **15** (500 MHz, D<sub>2</sub>O).

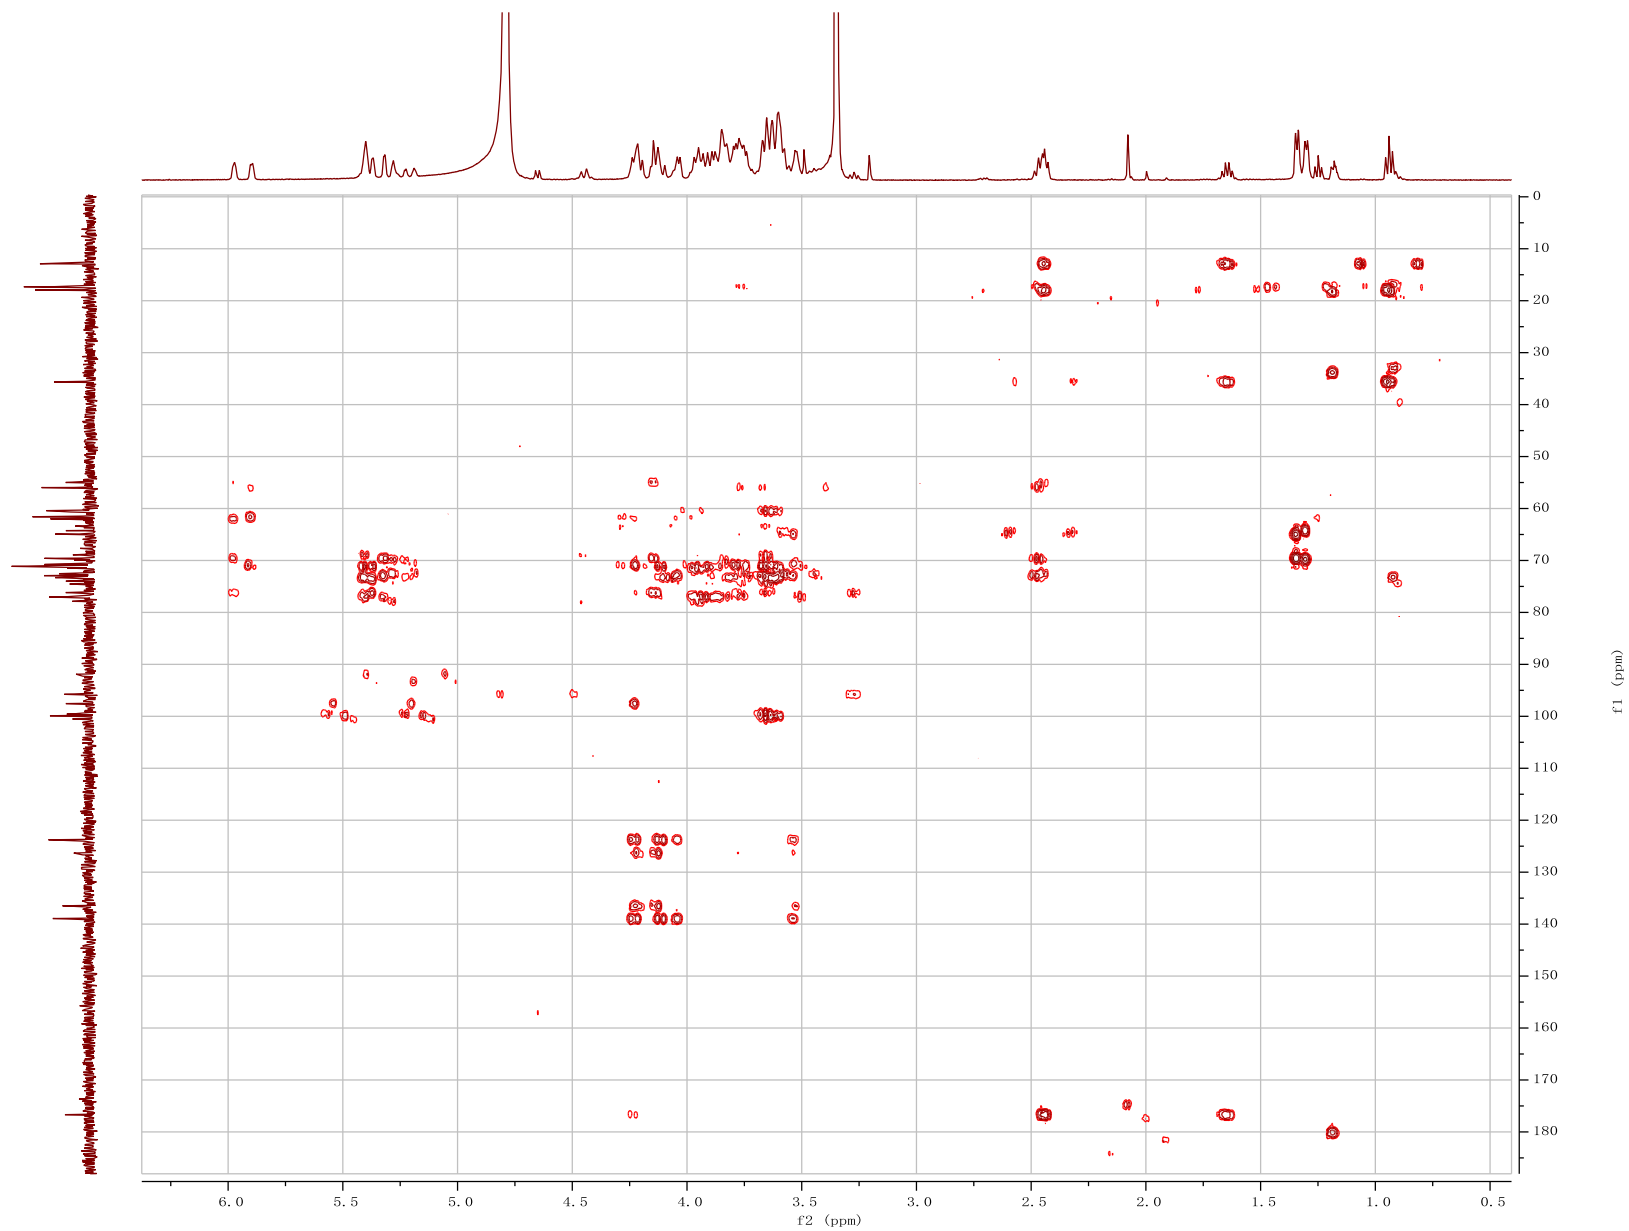

**Figure S129.** HMBC spectrum of compound **15** (500 MHz, D<sub>2</sub>O).

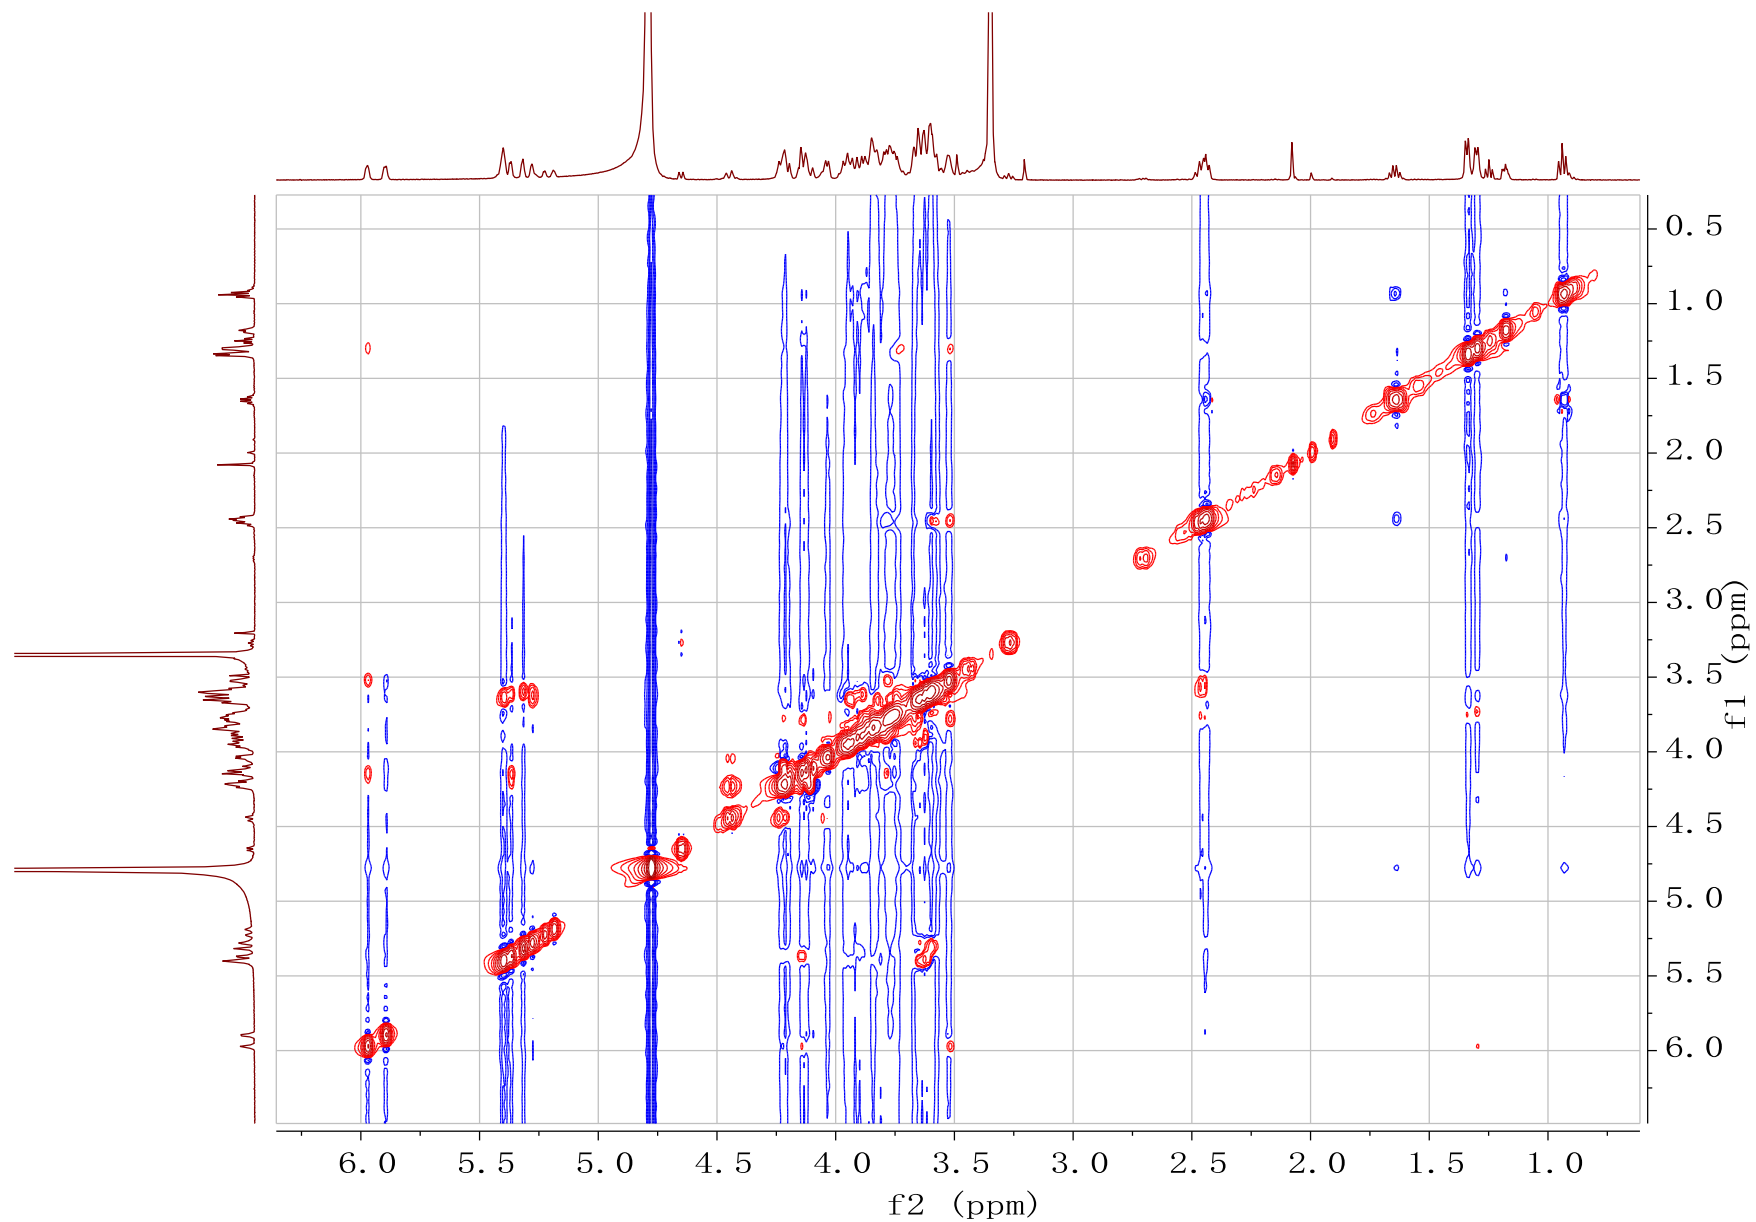

**Figure S130.** NOESY spectrum of compound **15** (500 MHz, D<sub>2</sub>O).

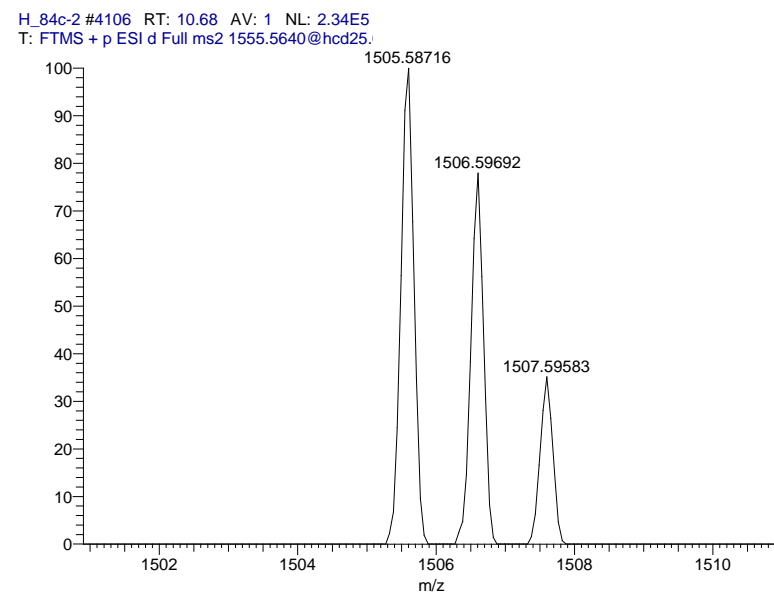

**Figure S131.** HRESIMS spectrum of compound **15**.

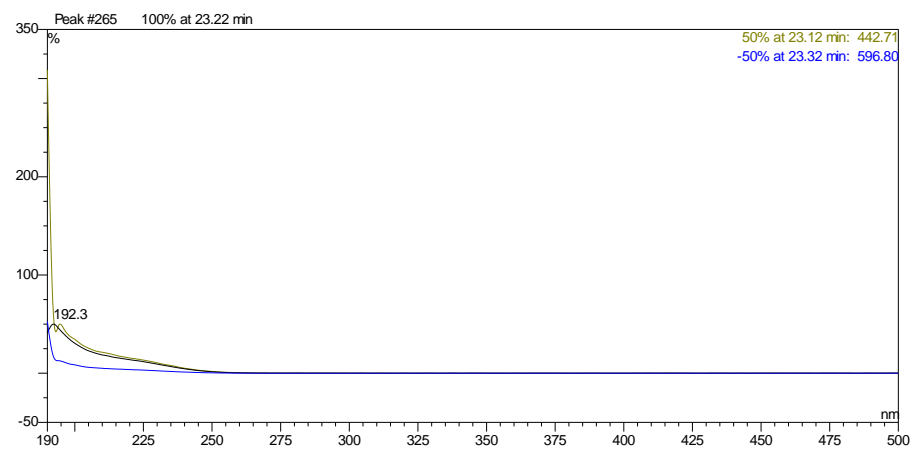

**Figure S132.** UV spectrum of compound **15**.

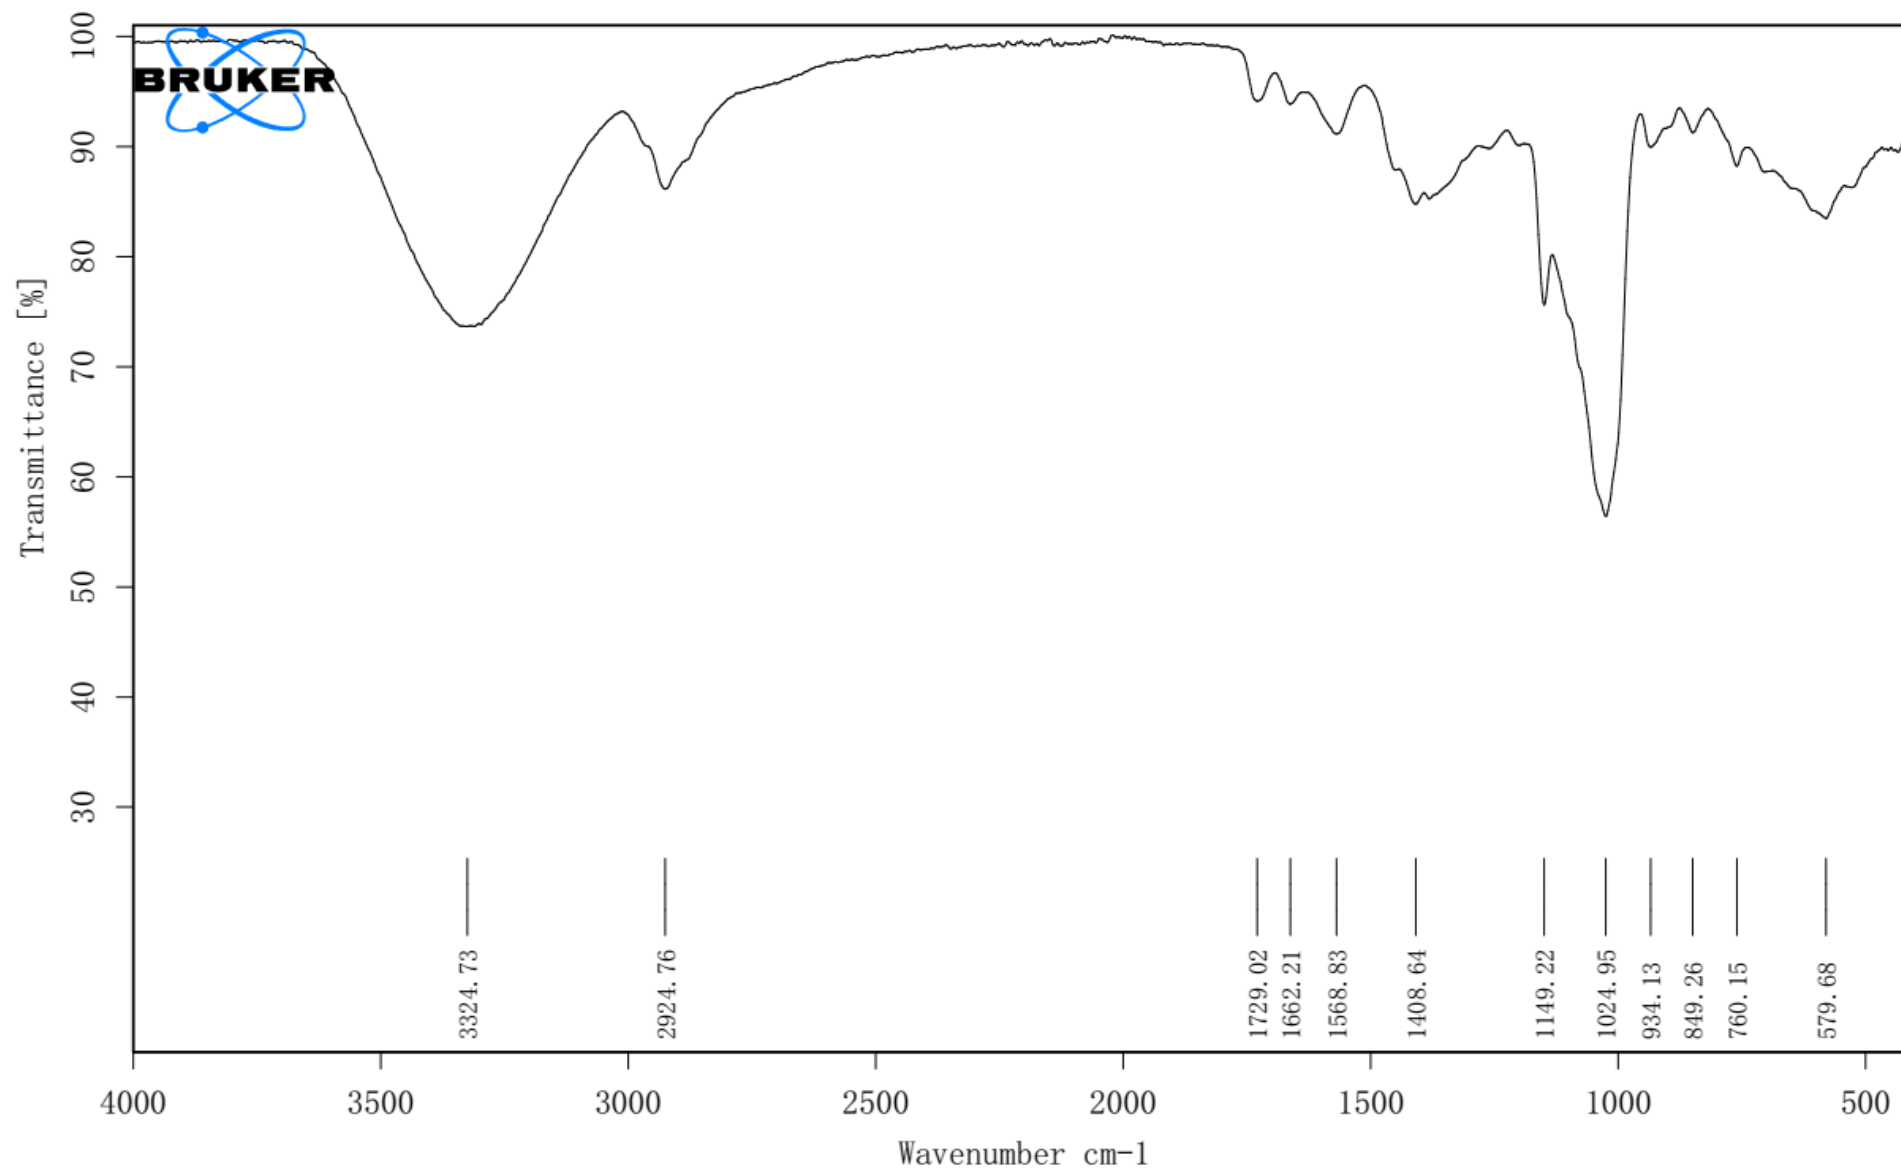

**Figure S133.** IR spectrum of compound **15**.



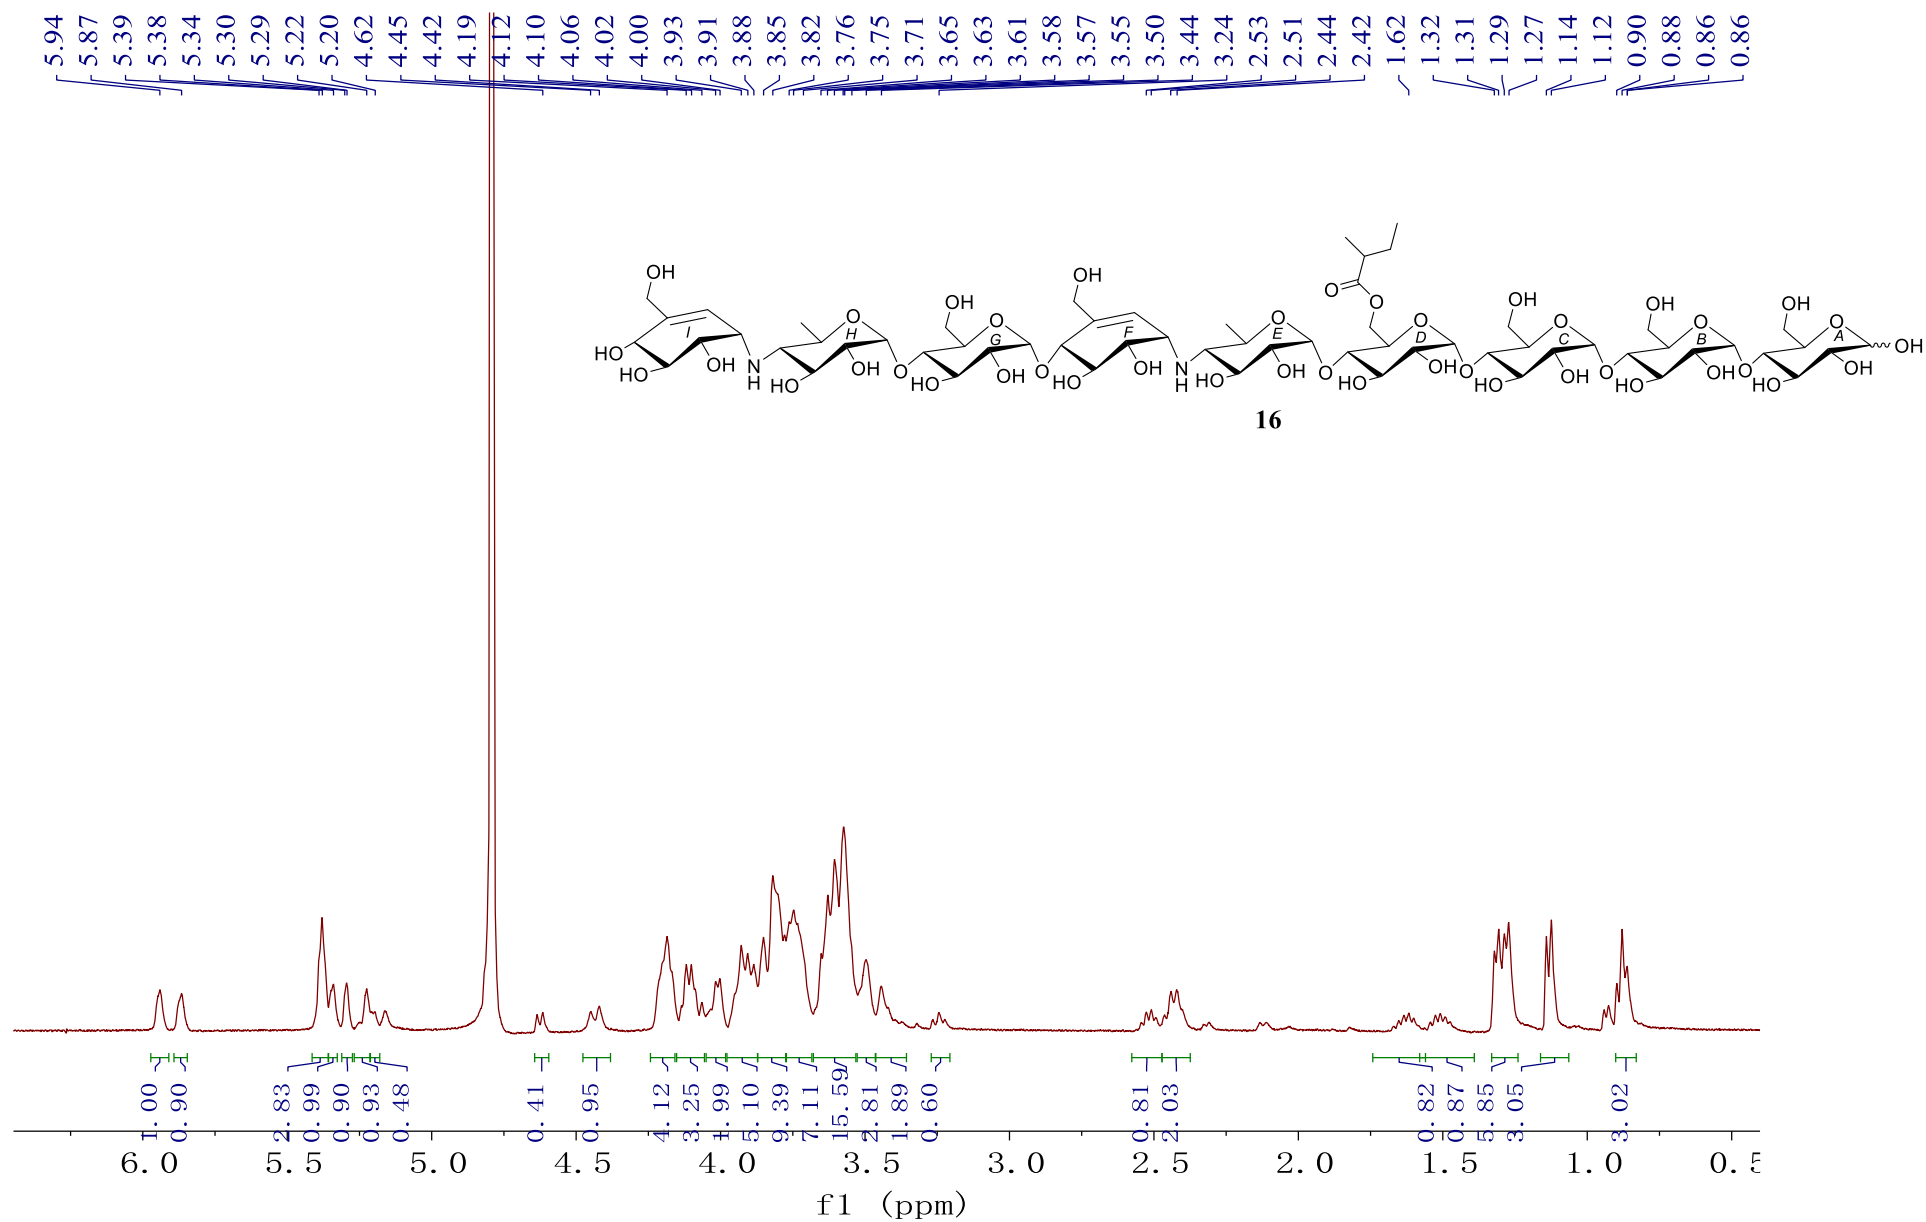

**Figure S134.**  $^1\text{H}$  NMR spectrum of compound **16** (500 MHz,  $\text{D}_2\text{O}$ ).

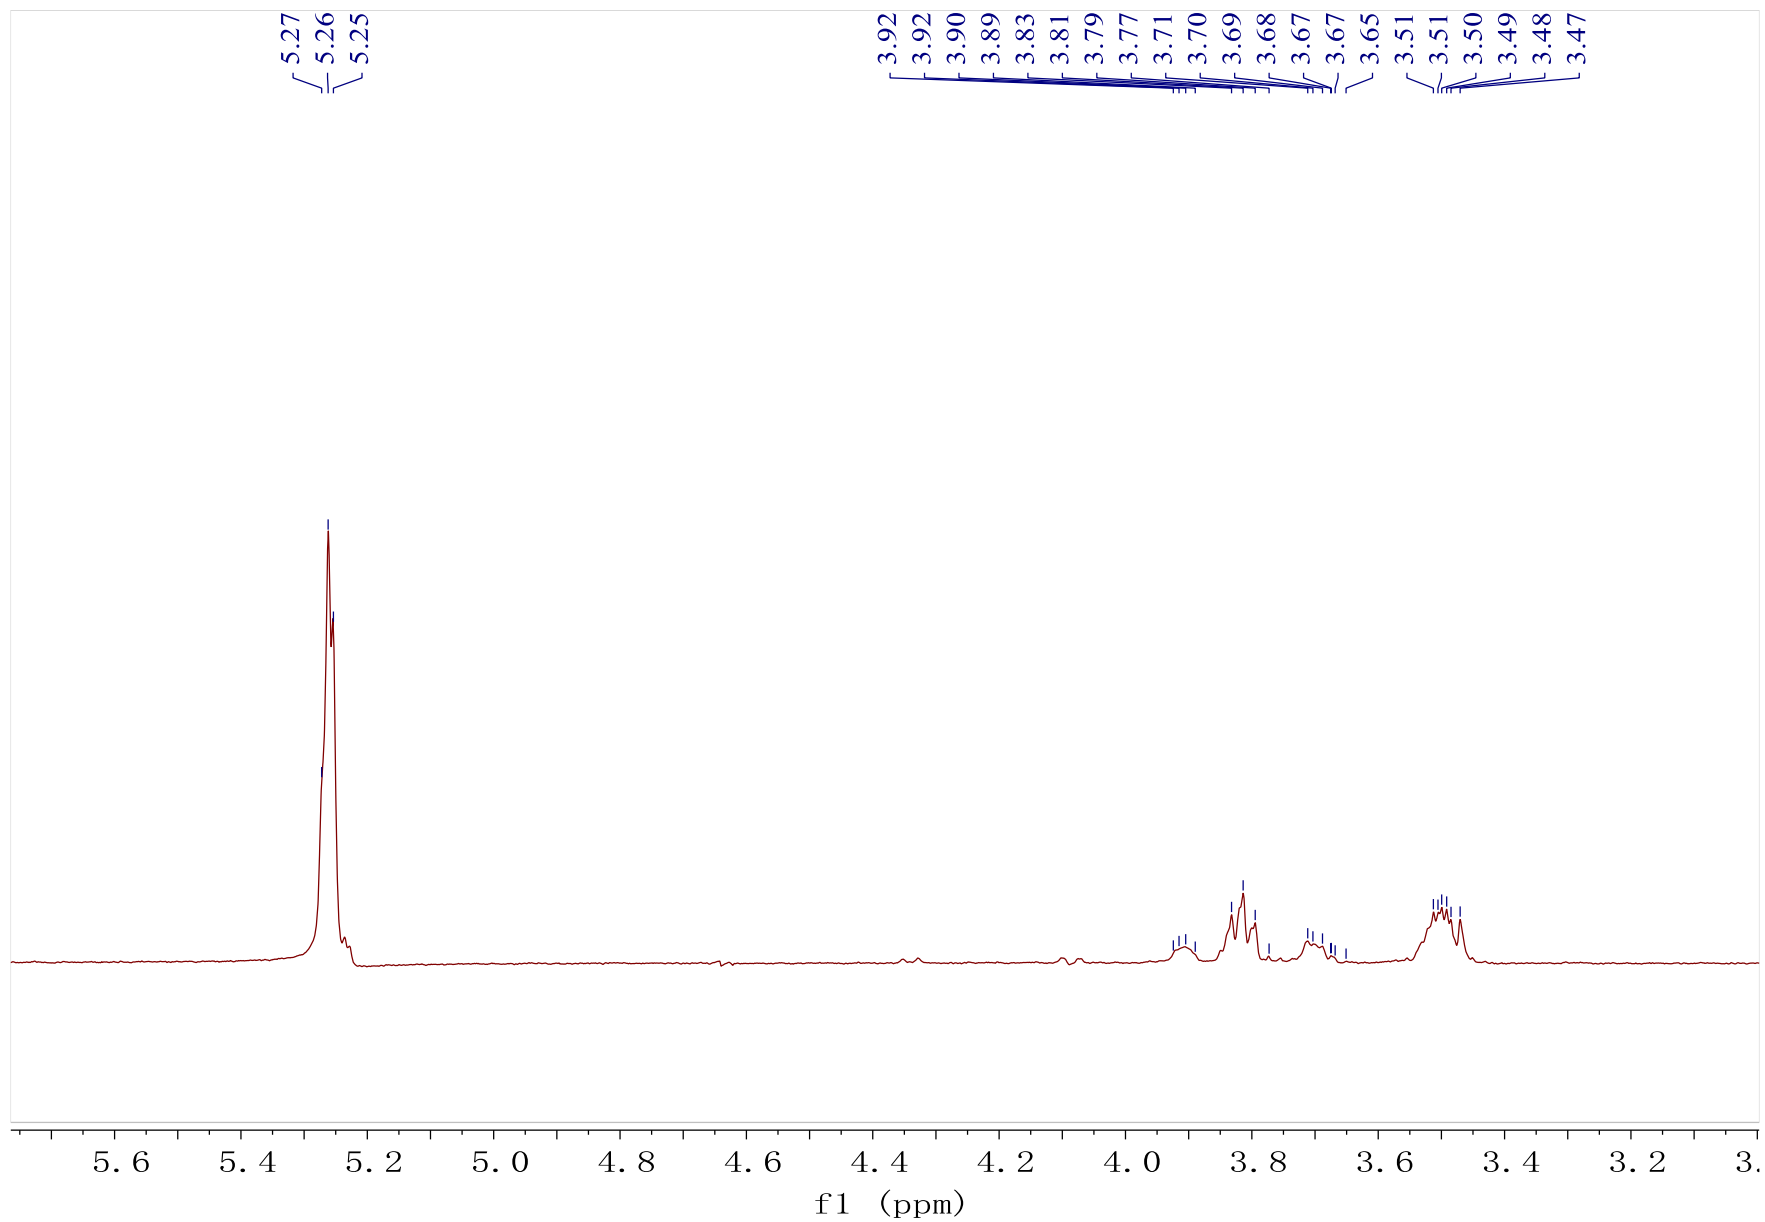

**Figure S135.** 1D-selective TOCSY spectrum of compound **16** (500 MHz, D<sub>2</sub>O, excitation at  $\delta$  5.20, H-A1 $\alpha$ ).

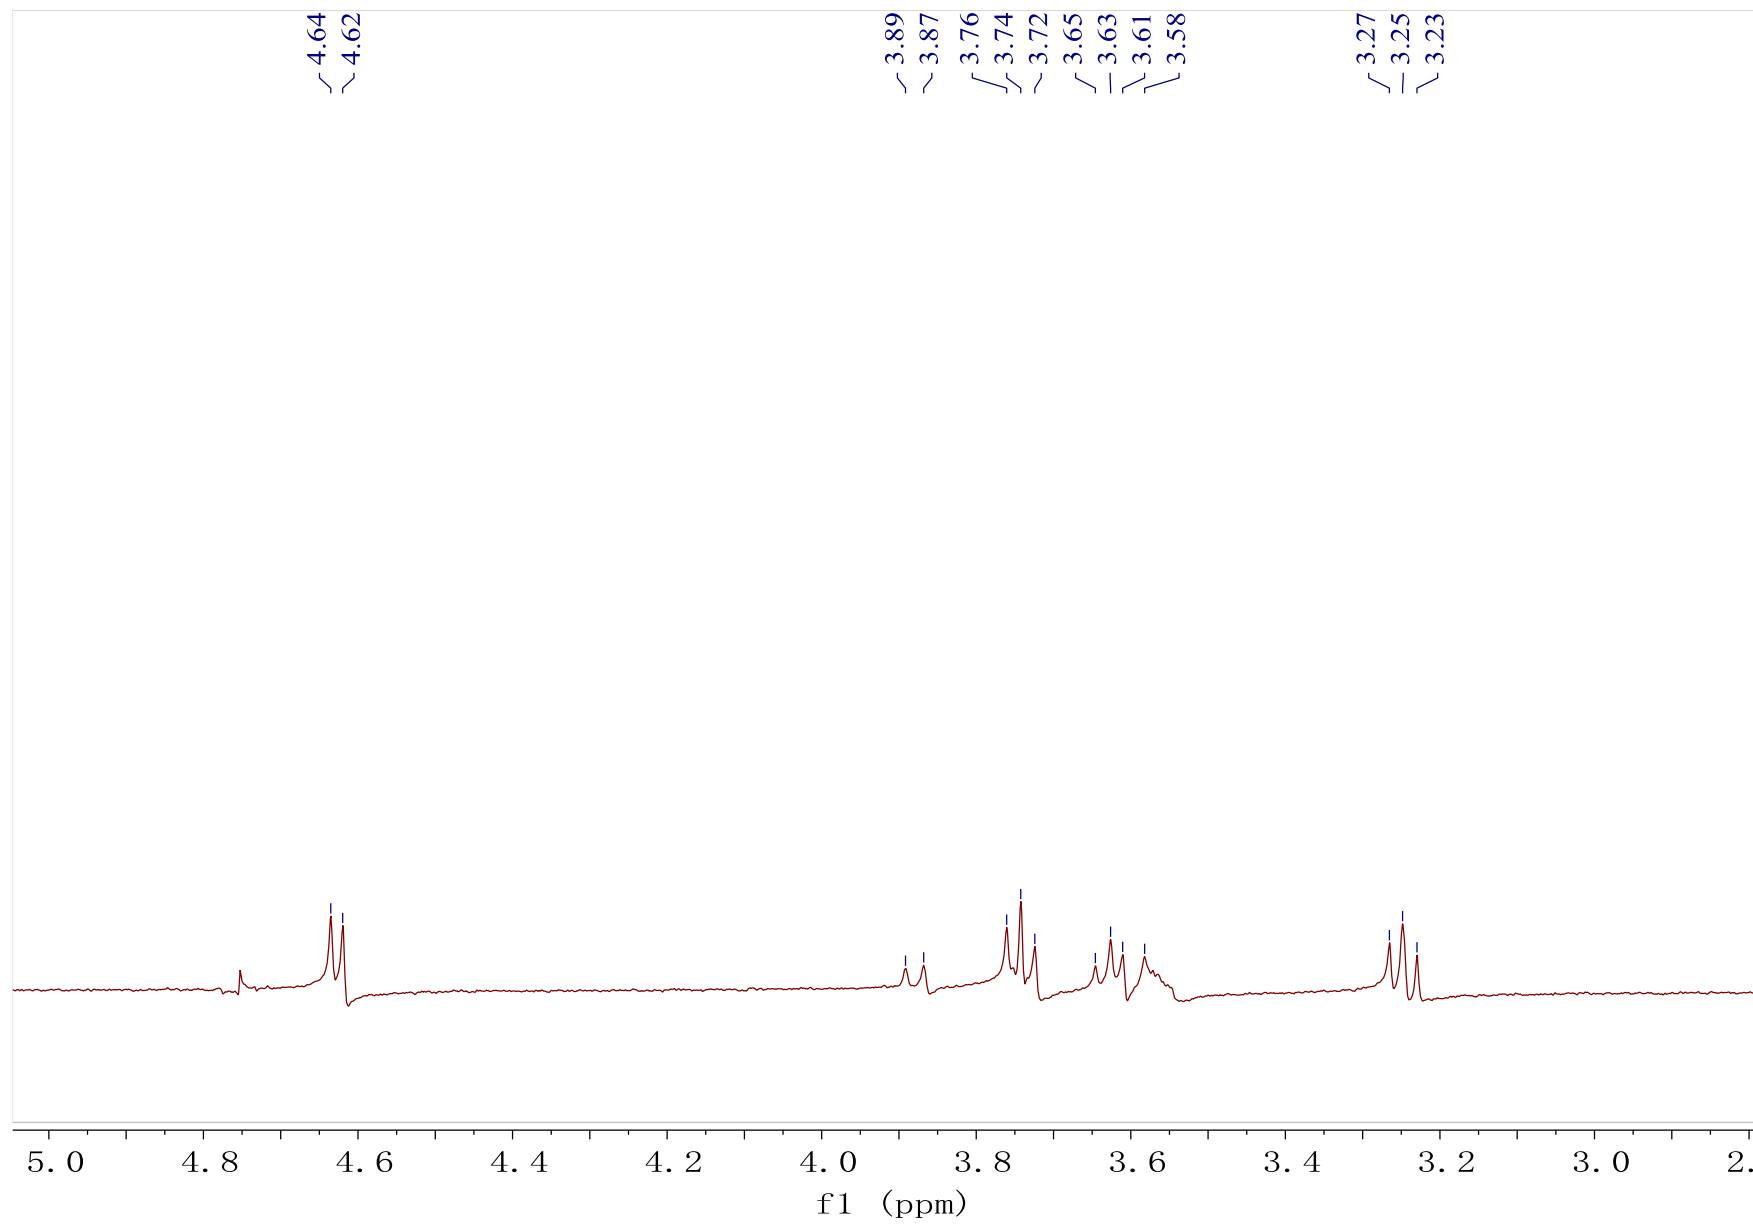

**Figure S136.** 1D-selective TOCSY spectrum of compound **16** (500 MHz, D<sub>2</sub>O, excitation at  $\delta$  4.63, H-A1 $\beta$ ).

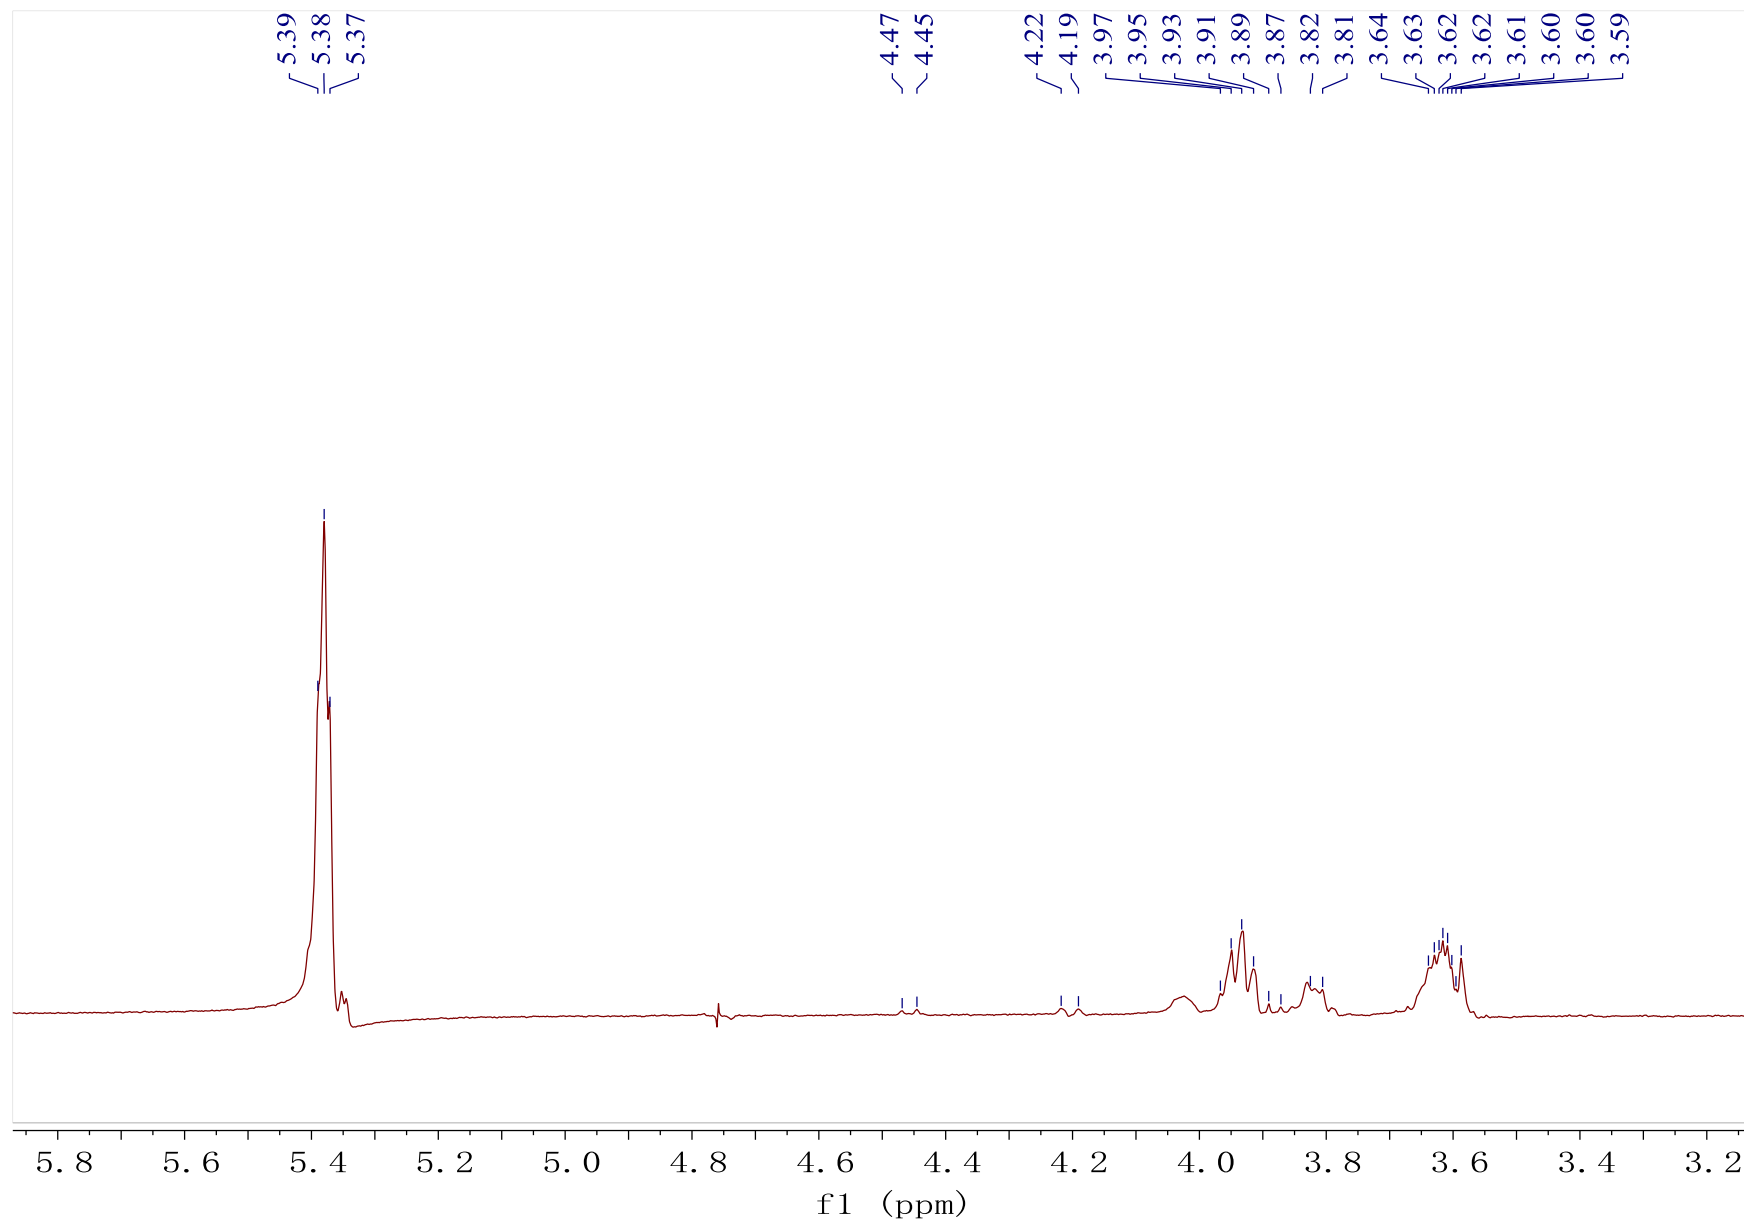

**Figure S137.** 1D-selective TOCSY spectrum of compound **16** (500 MHz, D<sub>2</sub>O, excitation at  $\delta$  5.38, H-**B1**, H-**C1**, H-**D1**).

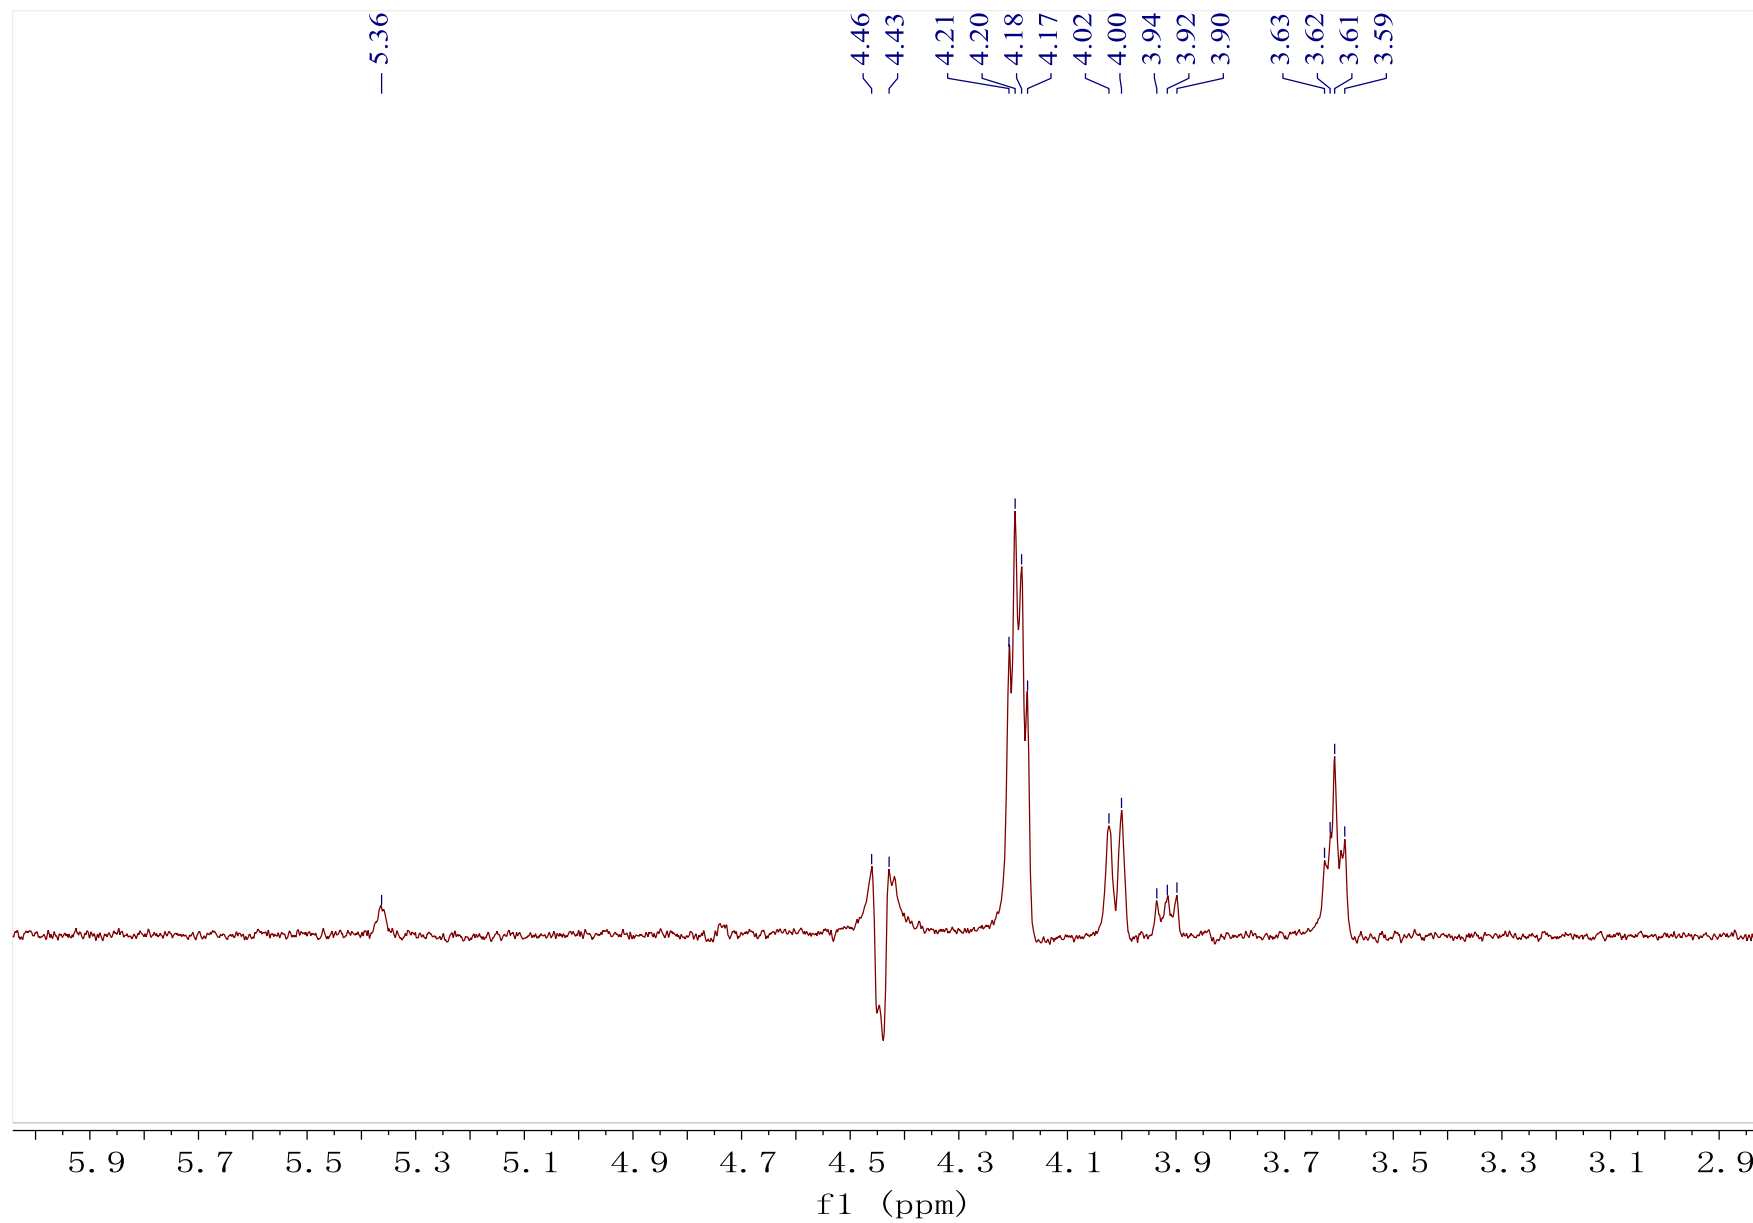

**Figure S138.** 1D-selective TOCSY spectrum of compound **16** (500 MHz, D<sub>2</sub>O, excitation at  $\delta$  4.43, H-D6a).

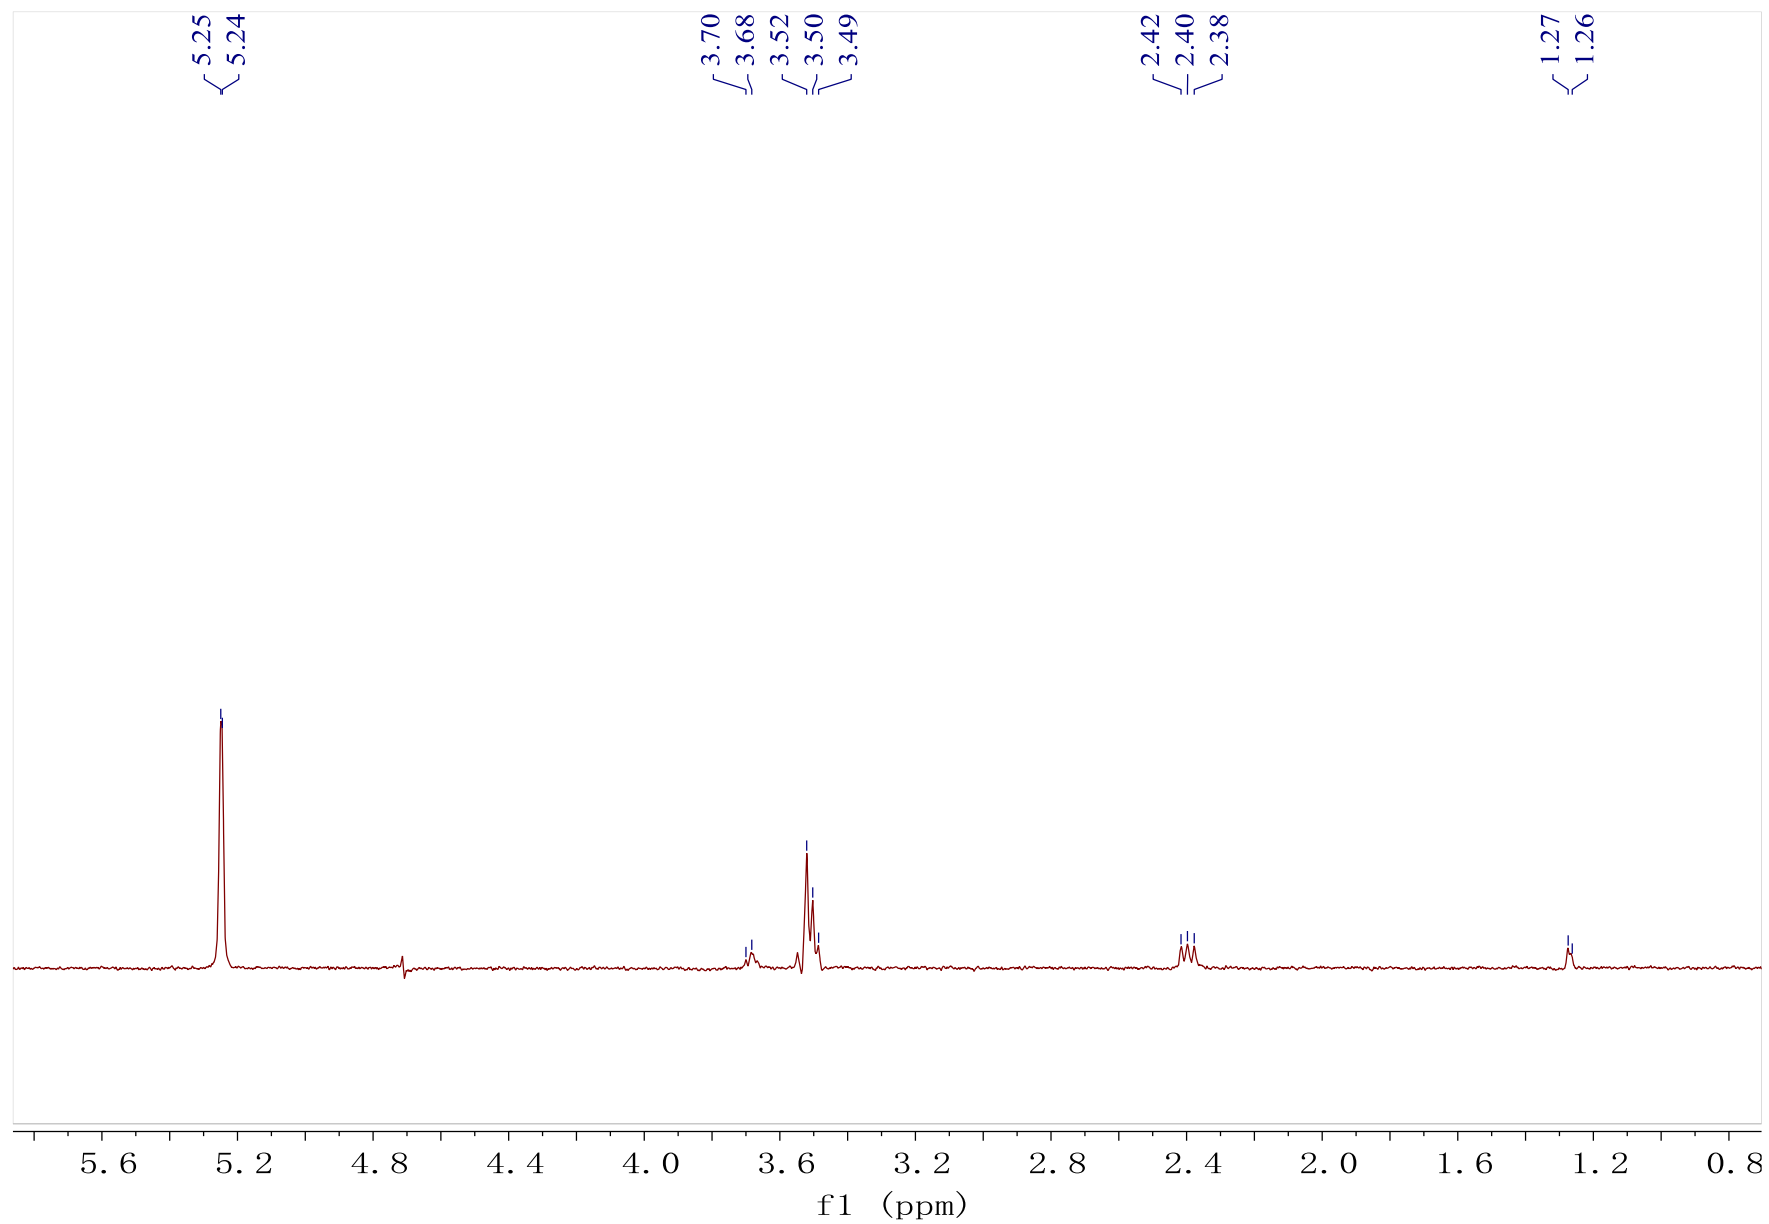

**Figure S139.** 1D-selective TOCSY spectrum of compound **16** (500 MHz, D<sub>2</sub>O, excitation at  $\delta$  5.24, H-E1).

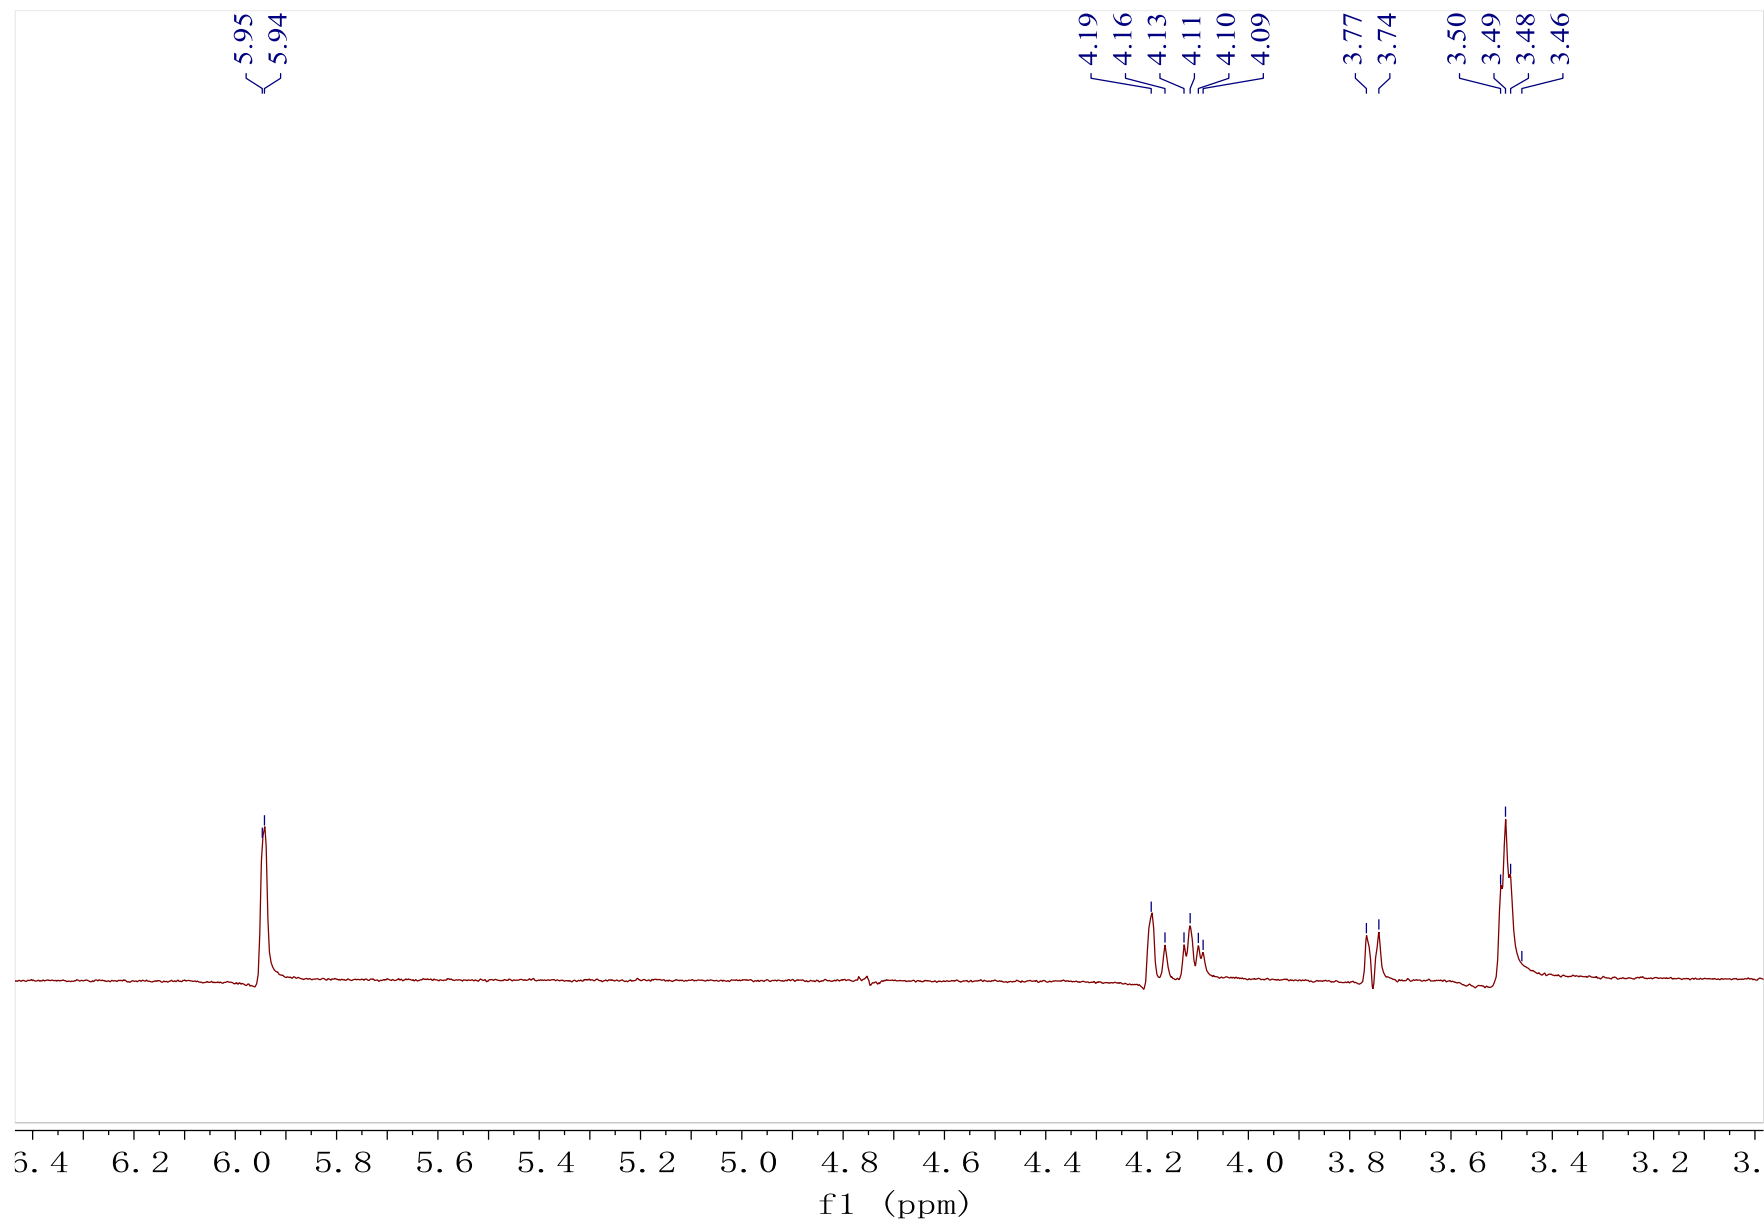

**Figure S140.** 1D-selective TOCSY spectrum of compound **16** (500 MHz, D<sub>2</sub>O, excitation at  $\delta$  5.94, H-F7).

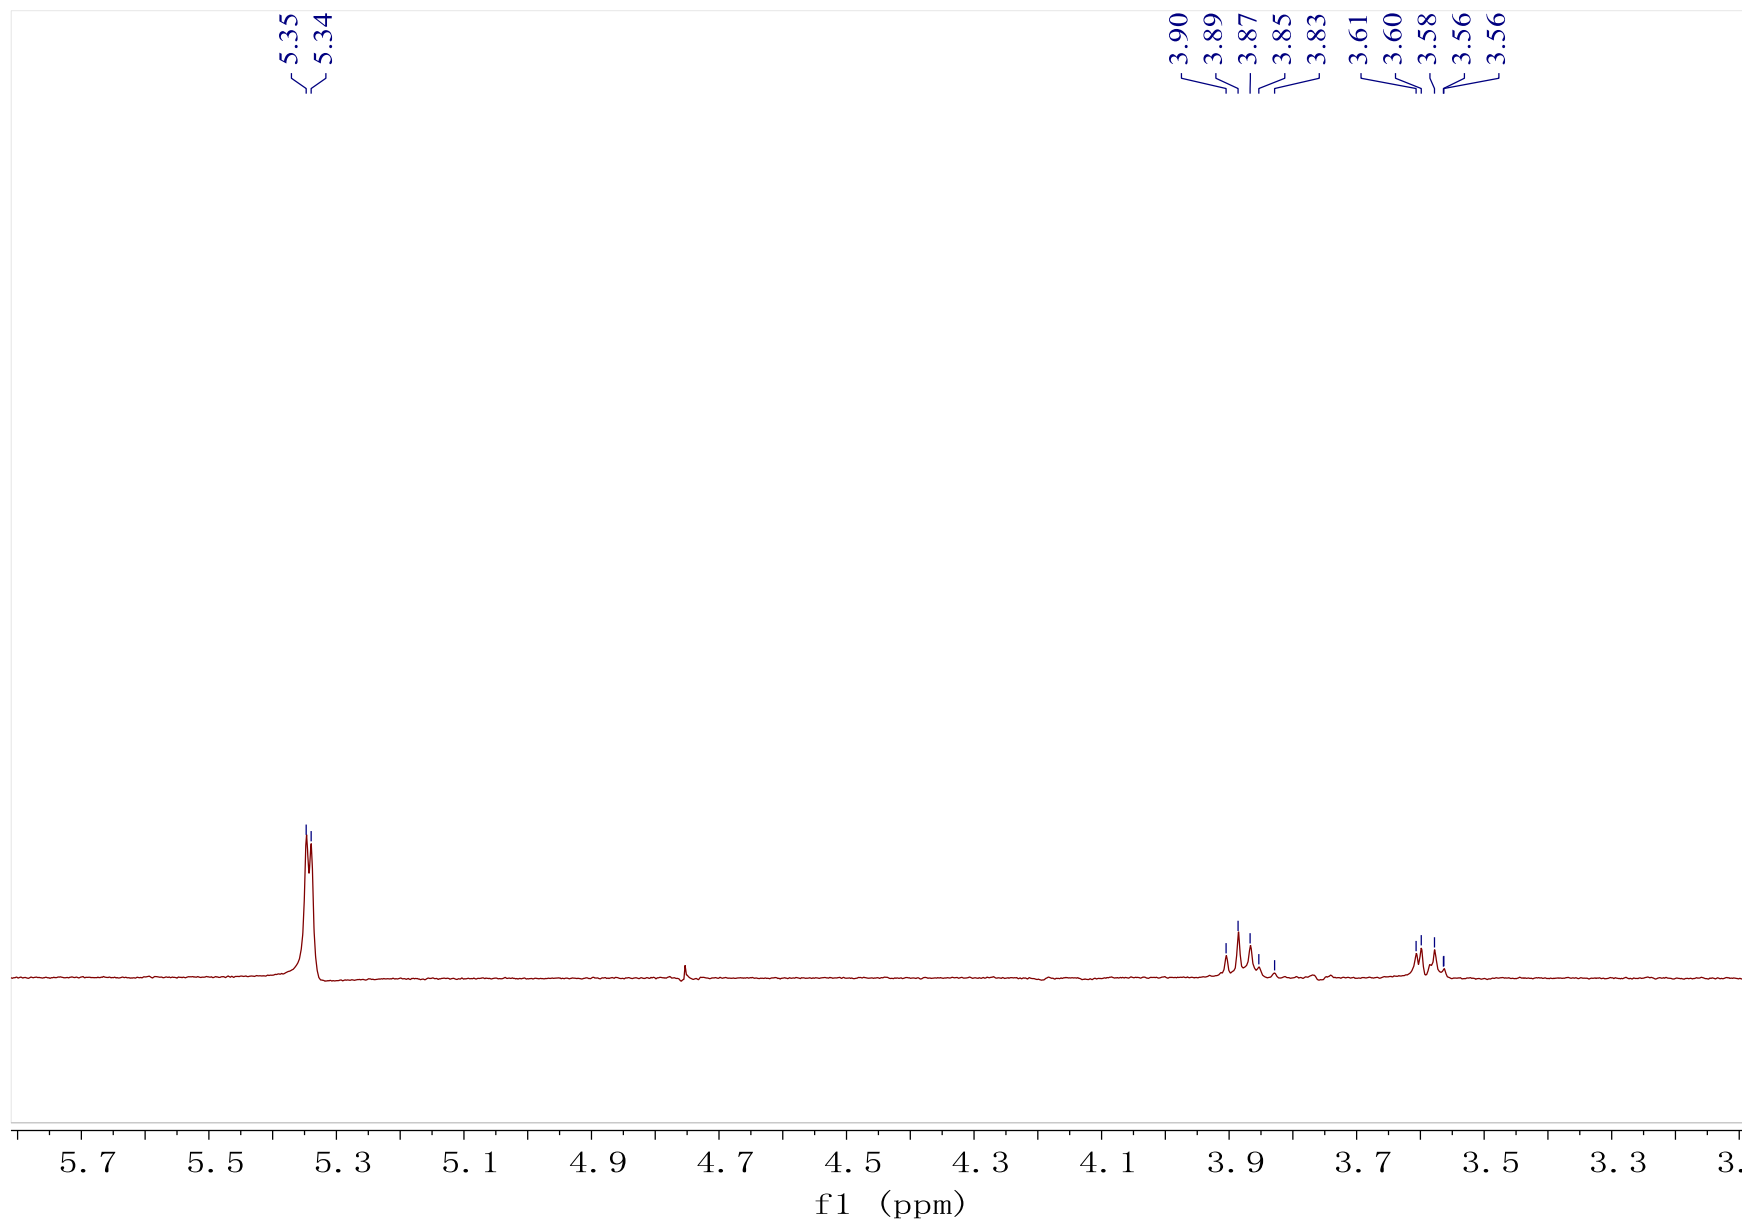

**Figure S141.** 1D-selective TOCSY spectrum of compound **16** (500 MHz, D<sub>2</sub>O, excitation at  $\delta$  5.34, H-G1).



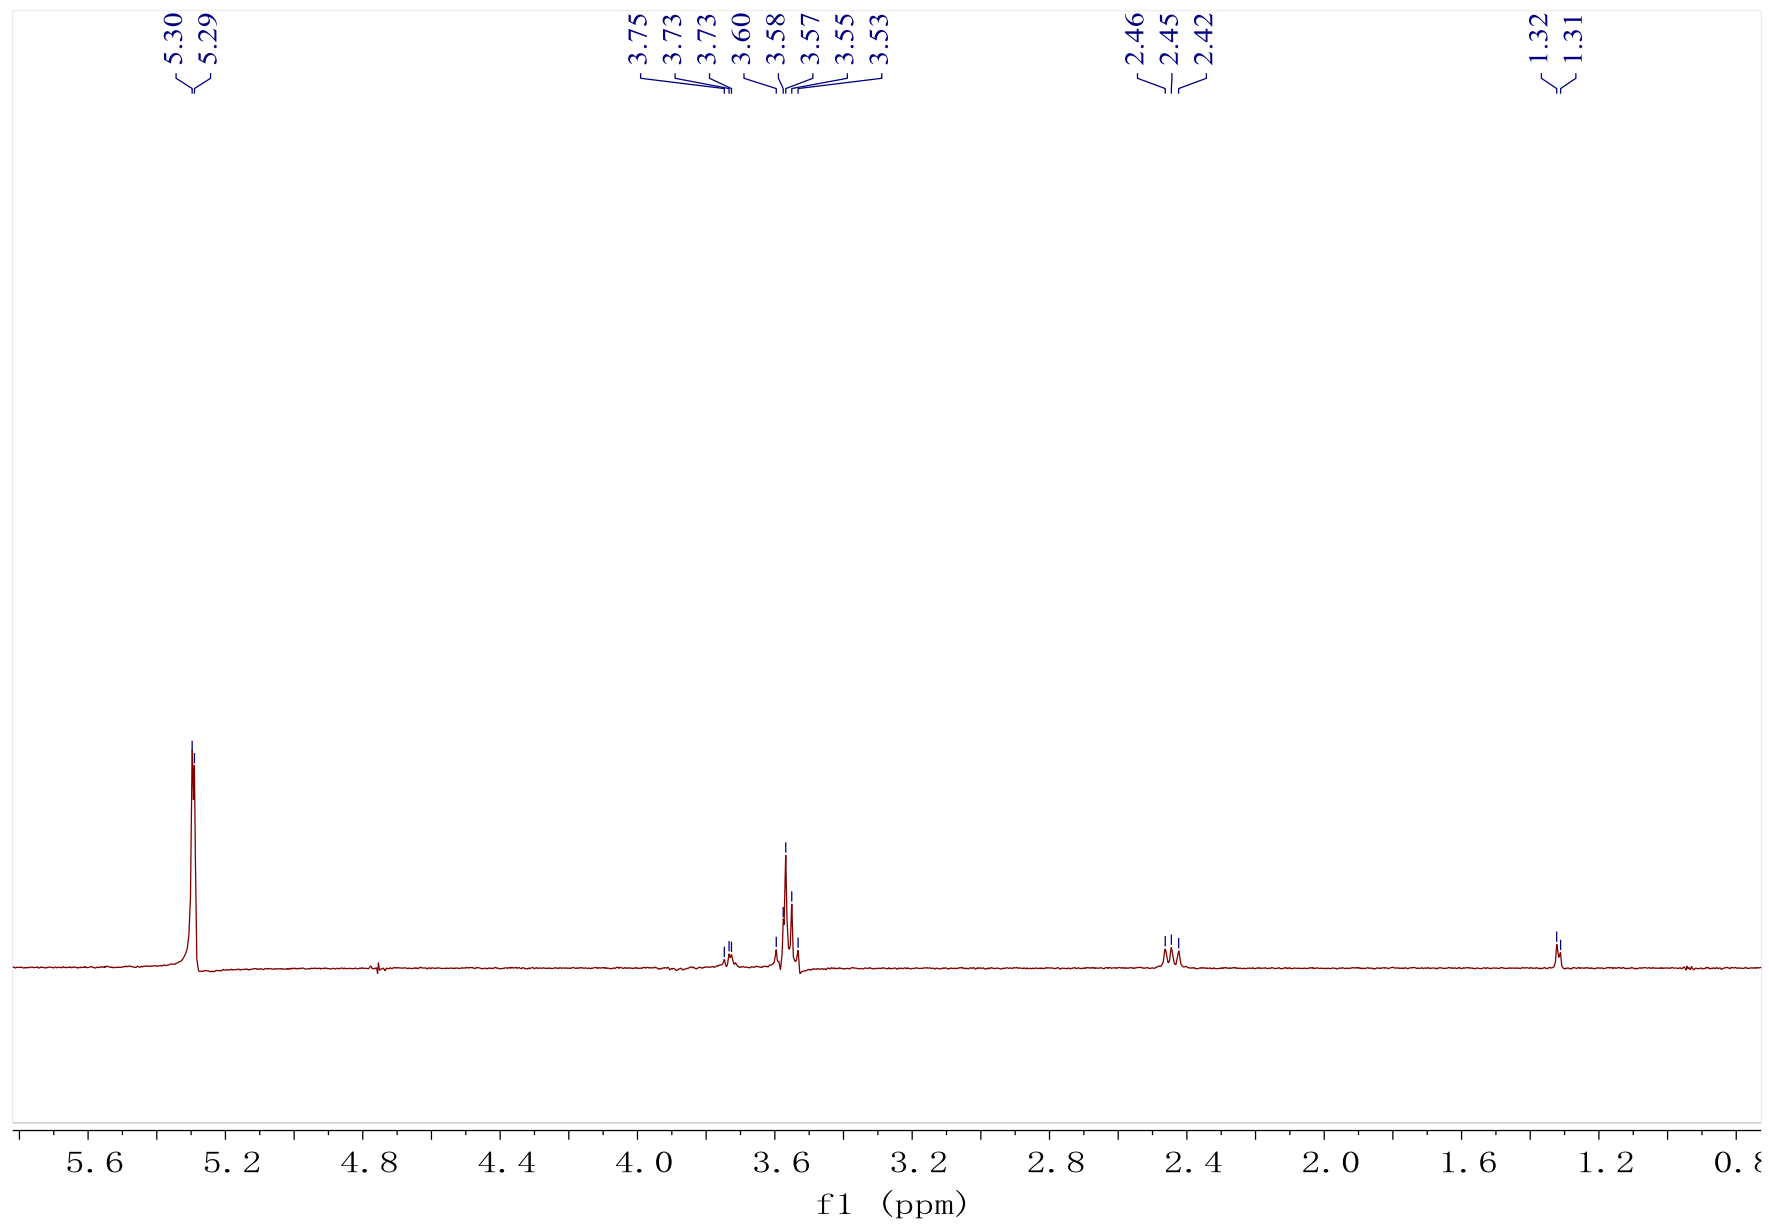

**Figure S142.** 1D-selective TOCSY spectrum of compound **16** (500 MHz, D<sub>2</sub>O, excitation at  $\delta$  5.30, H-**H1**).

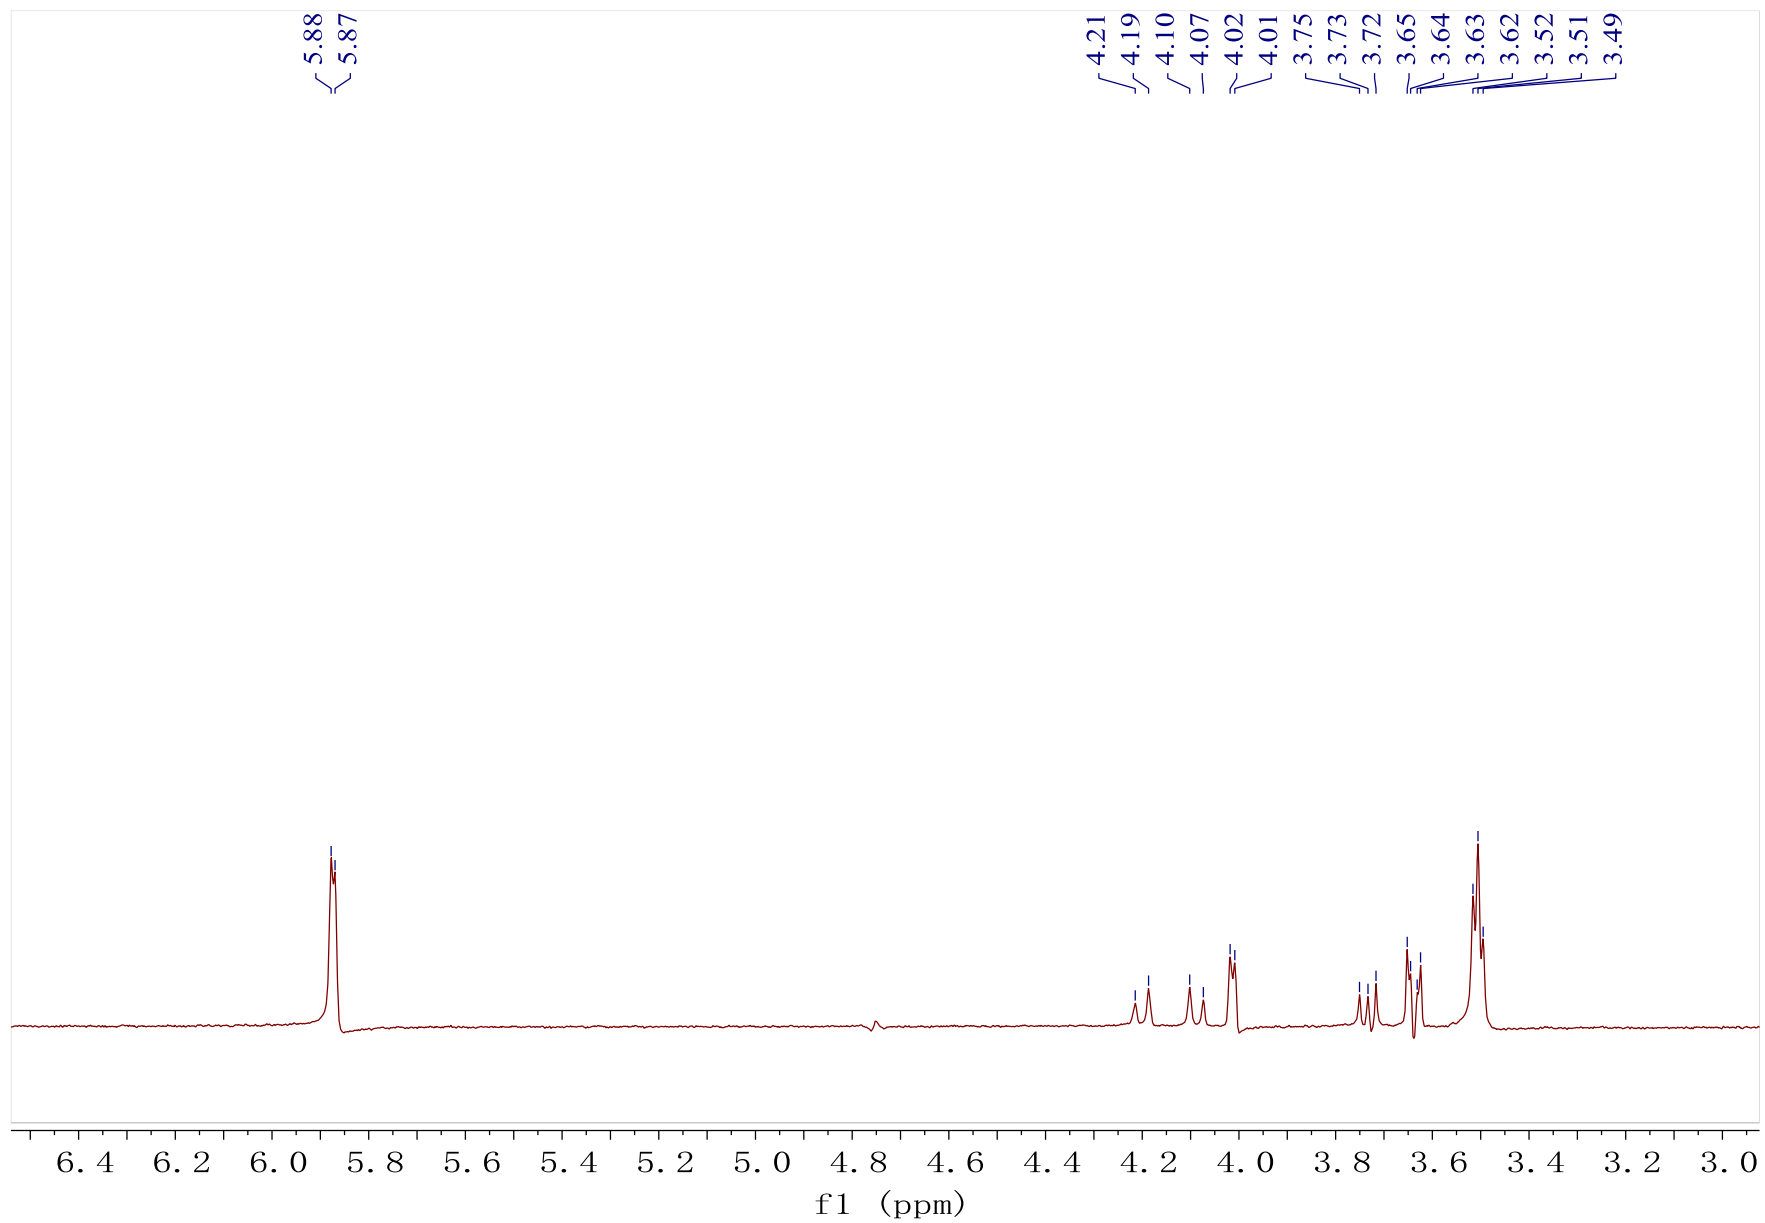

**Figure S143.** 1D-selective TOCSY spectrum of compound **16** (500 MHz, D<sub>2</sub>O, excitation at  $\delta$  5.87, H-**I7**).

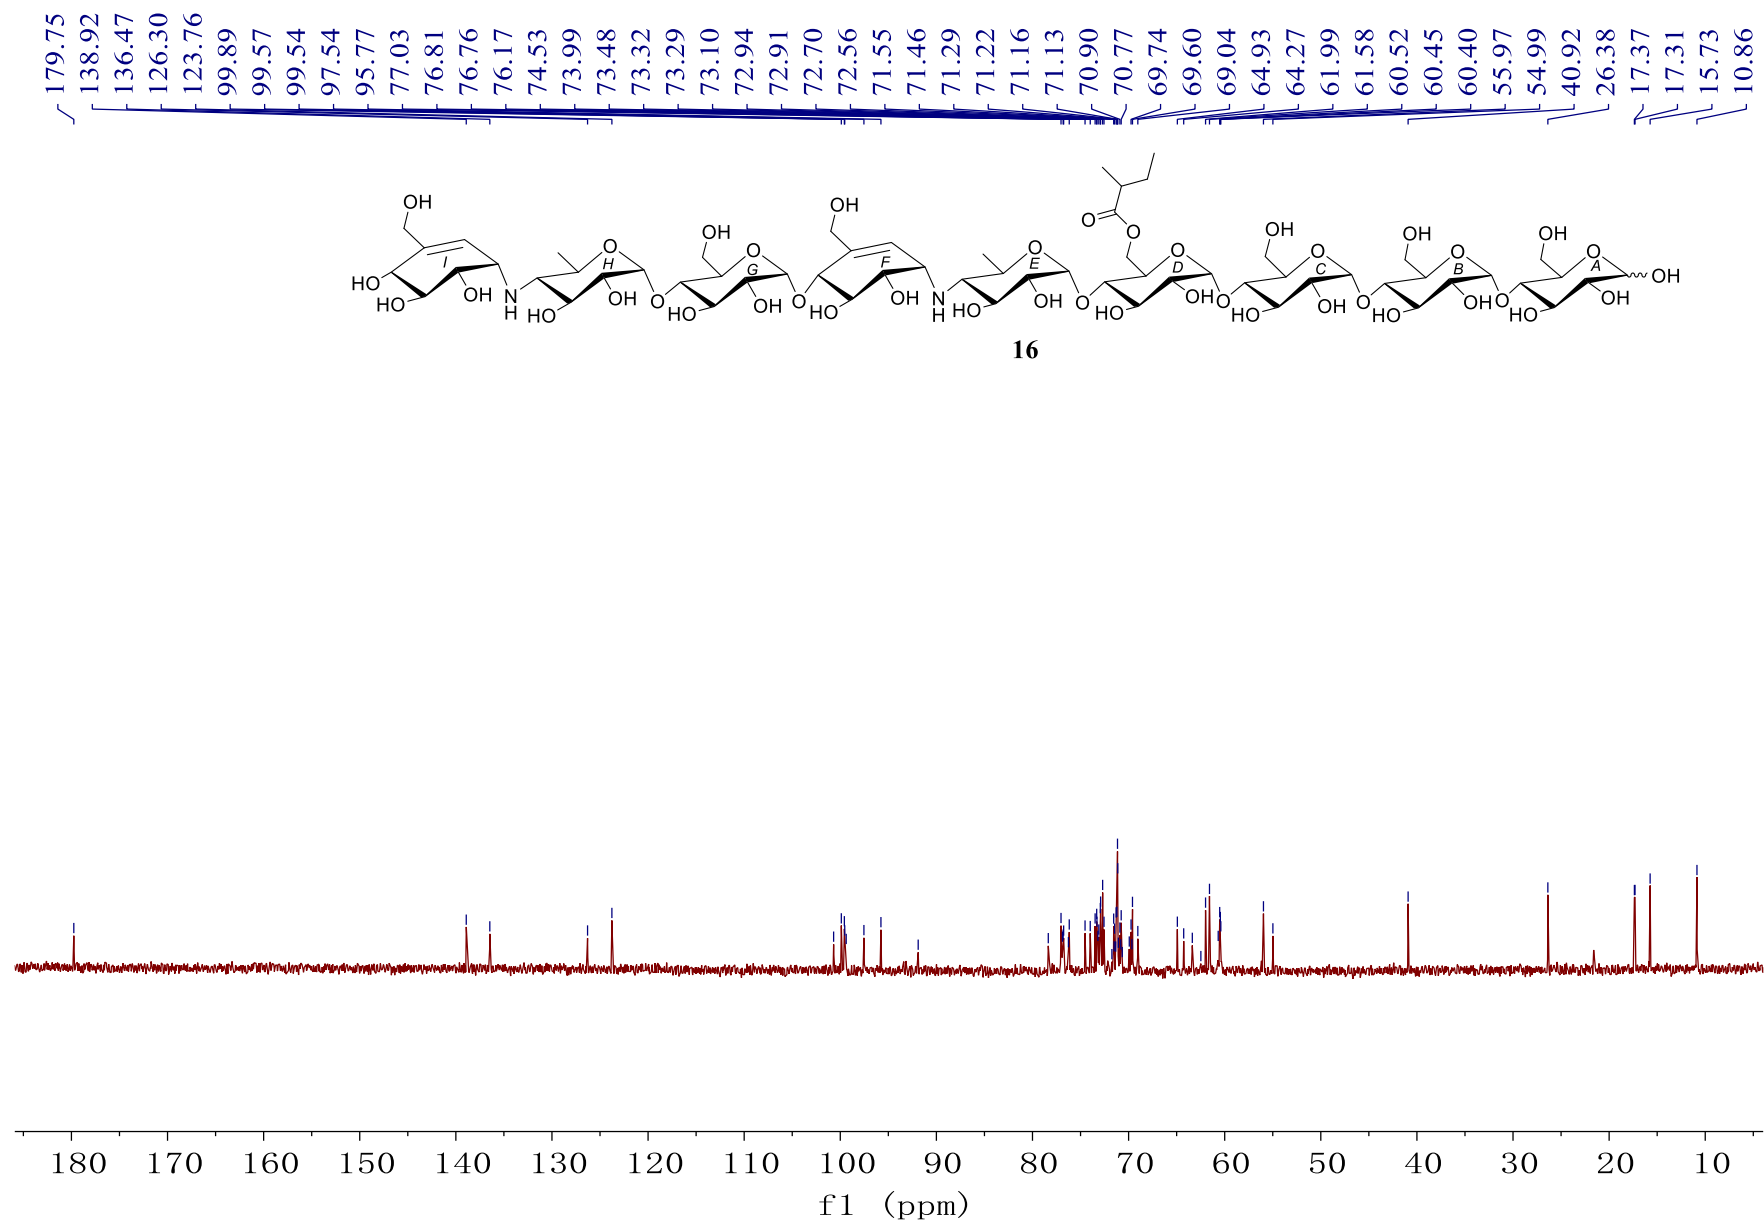

**Figure S144.**  $^{13}\text{C}$  NMR spectrum of compound **16** (125 MHz,  $\text{D}_2\text{O}$ ).

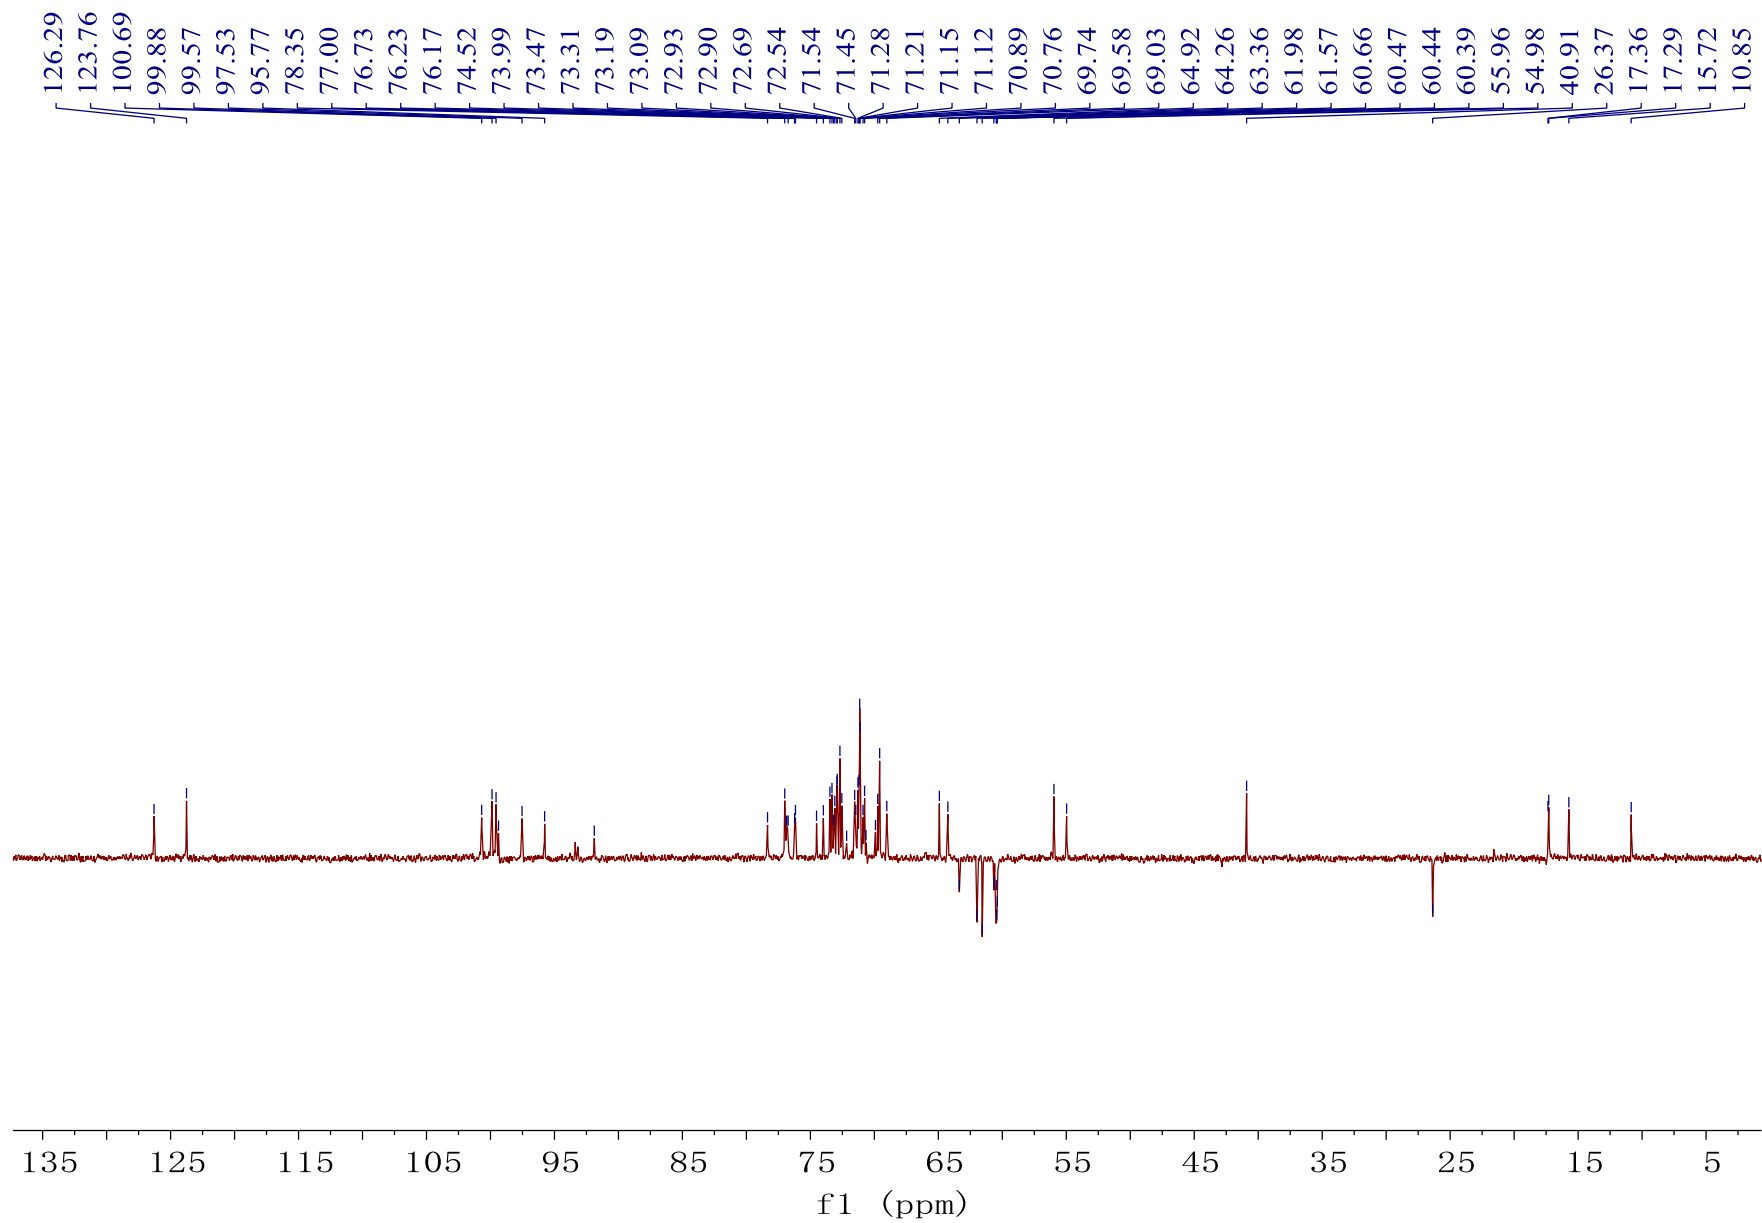

**Figure S145.** DEPT-135 spectrum of compound **16** (125 MHz, D<sub>2</sub>O).

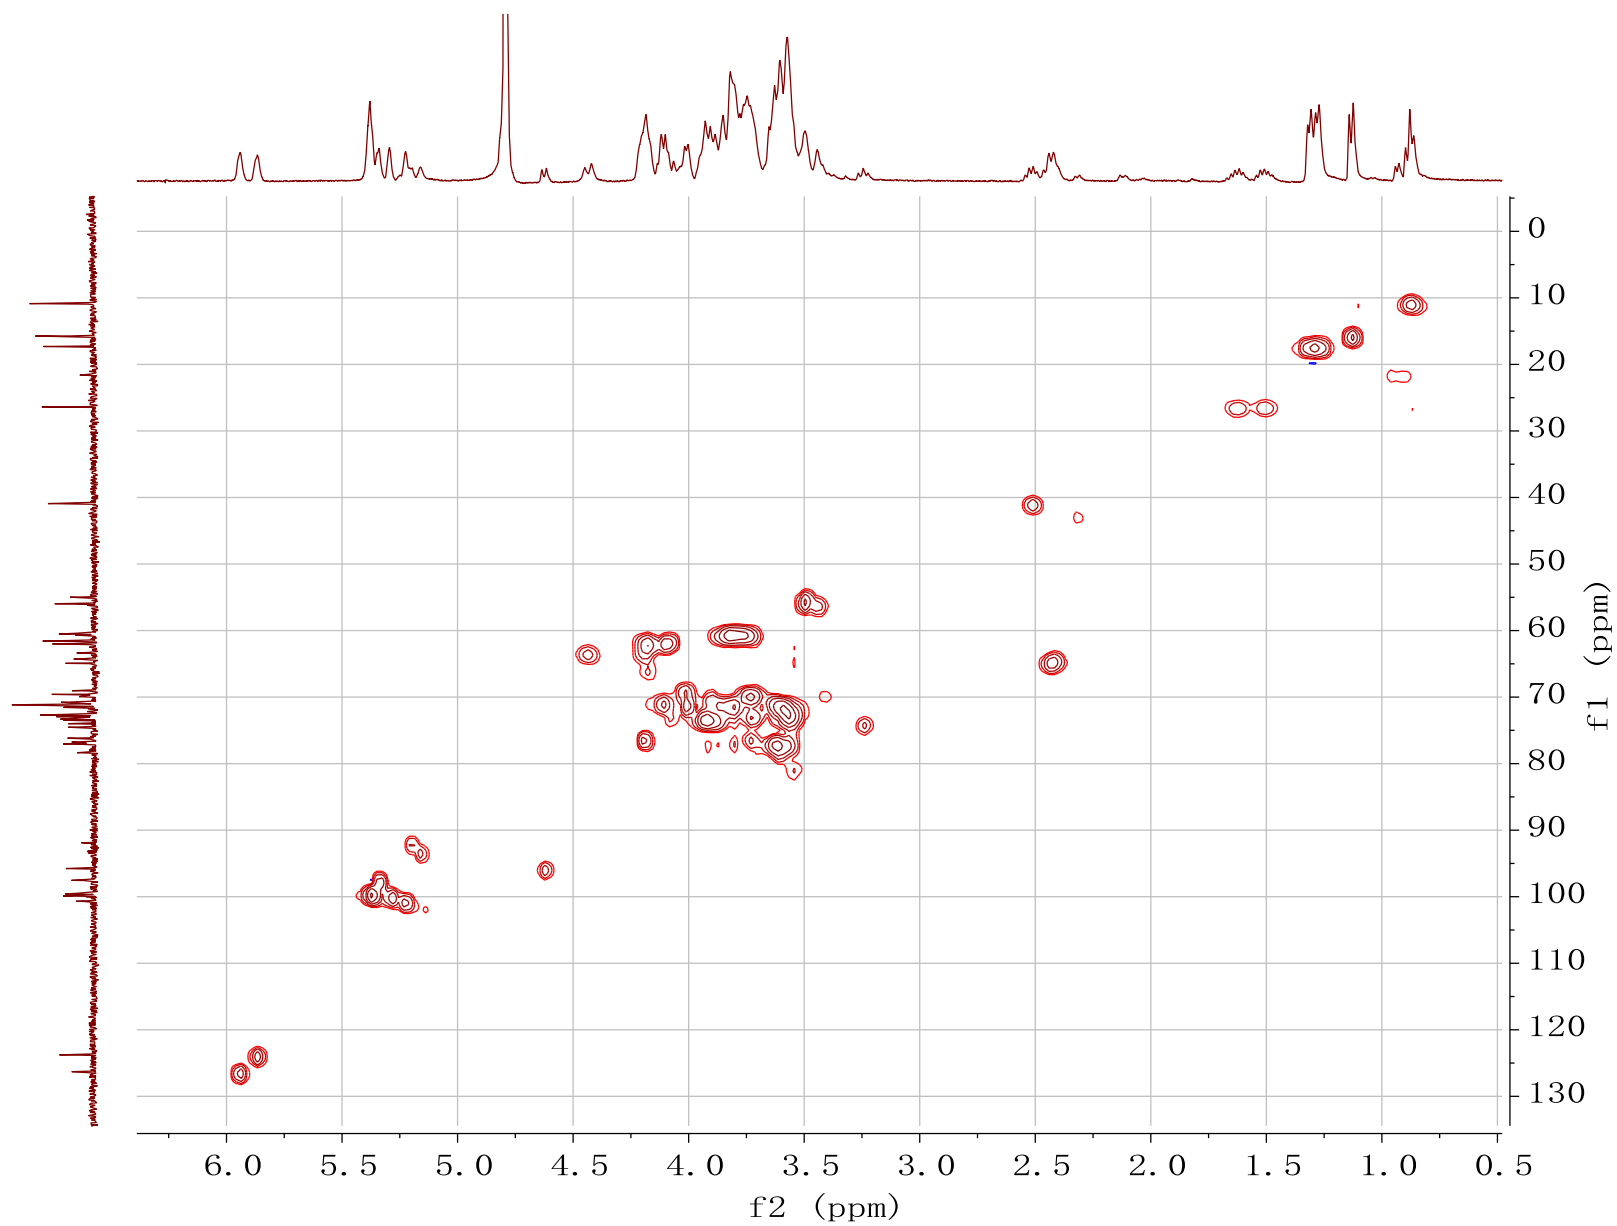

**Figure S146.** HSQC spectrum of compound **16** (500 MHz,  $\text{D}_2\text{O}$ ).

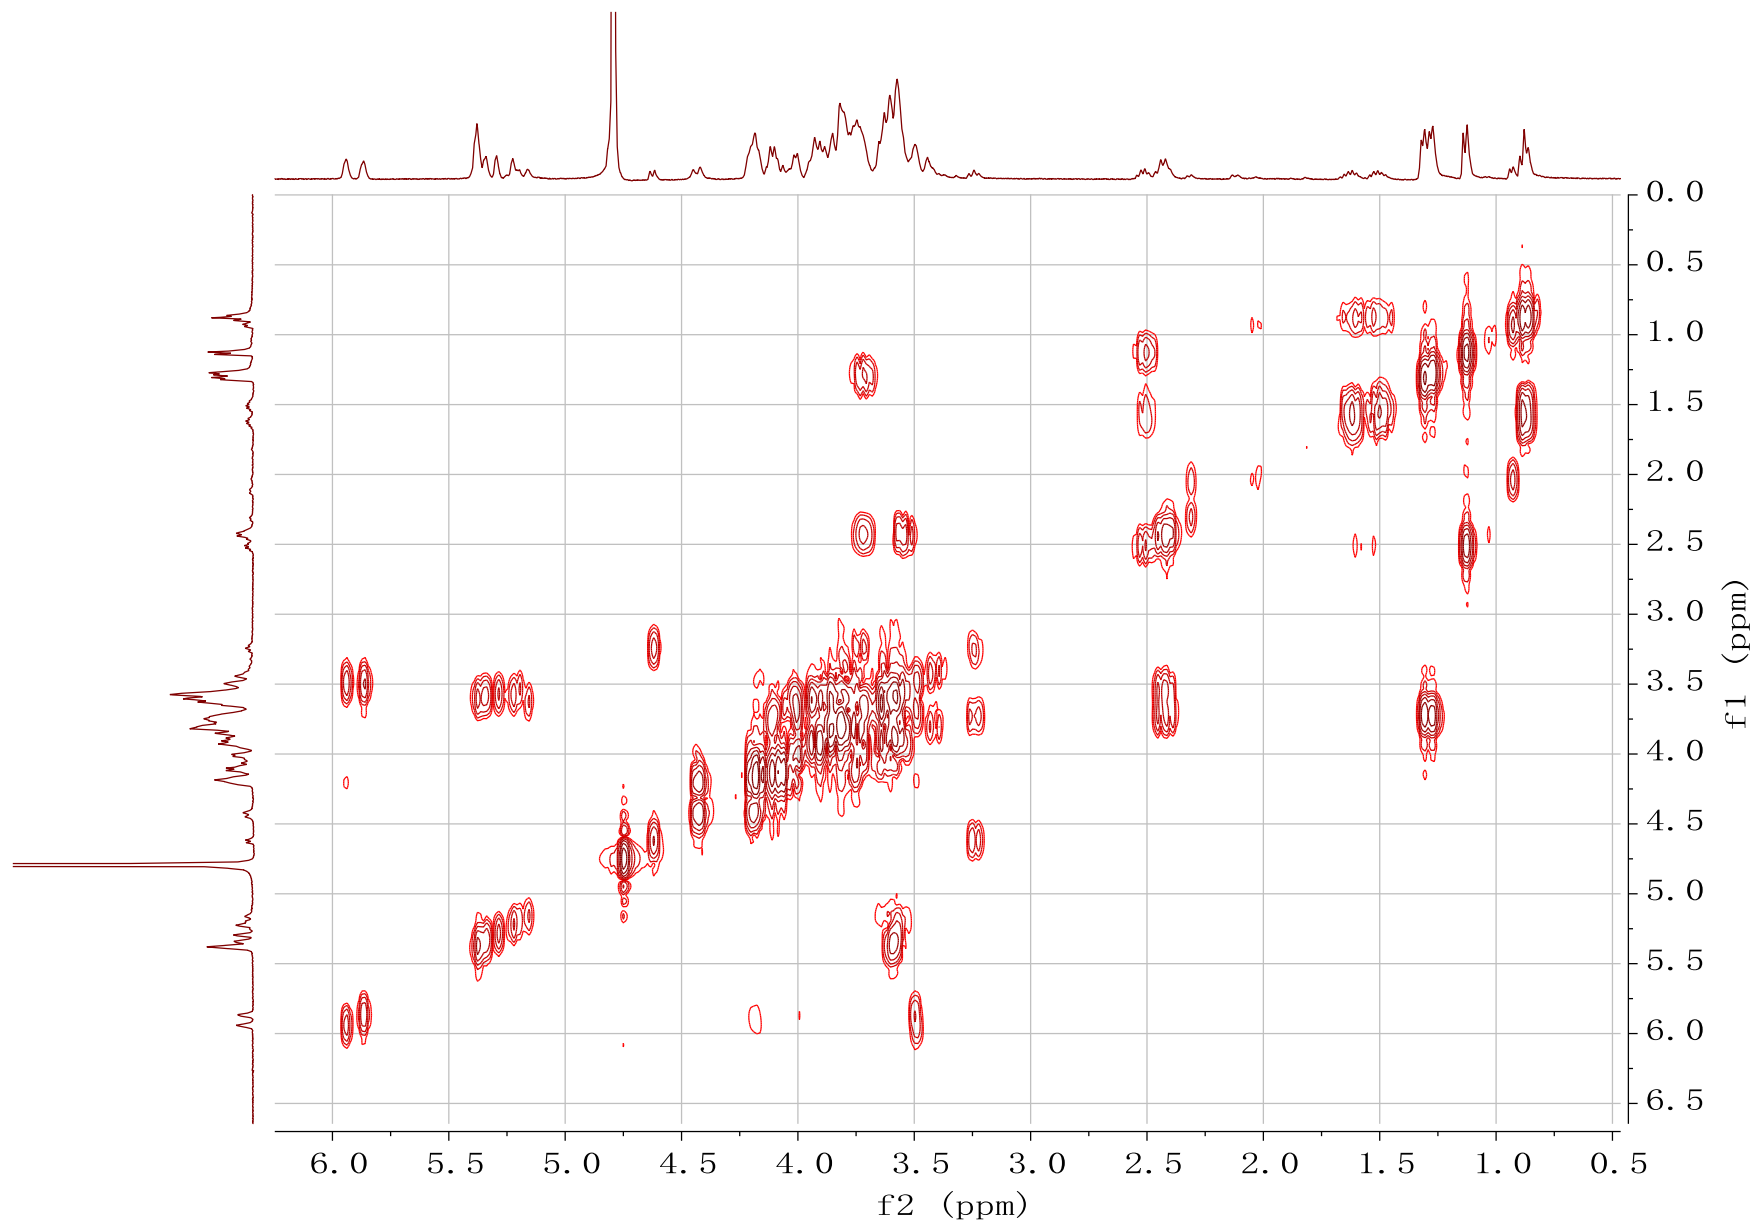

**Figure S147.**  $^1\text{H}$ - $^1\text{H}$  COSY spectrum of compound **16** (500 MHz,  $\text{D}_2\text{O}$ ).

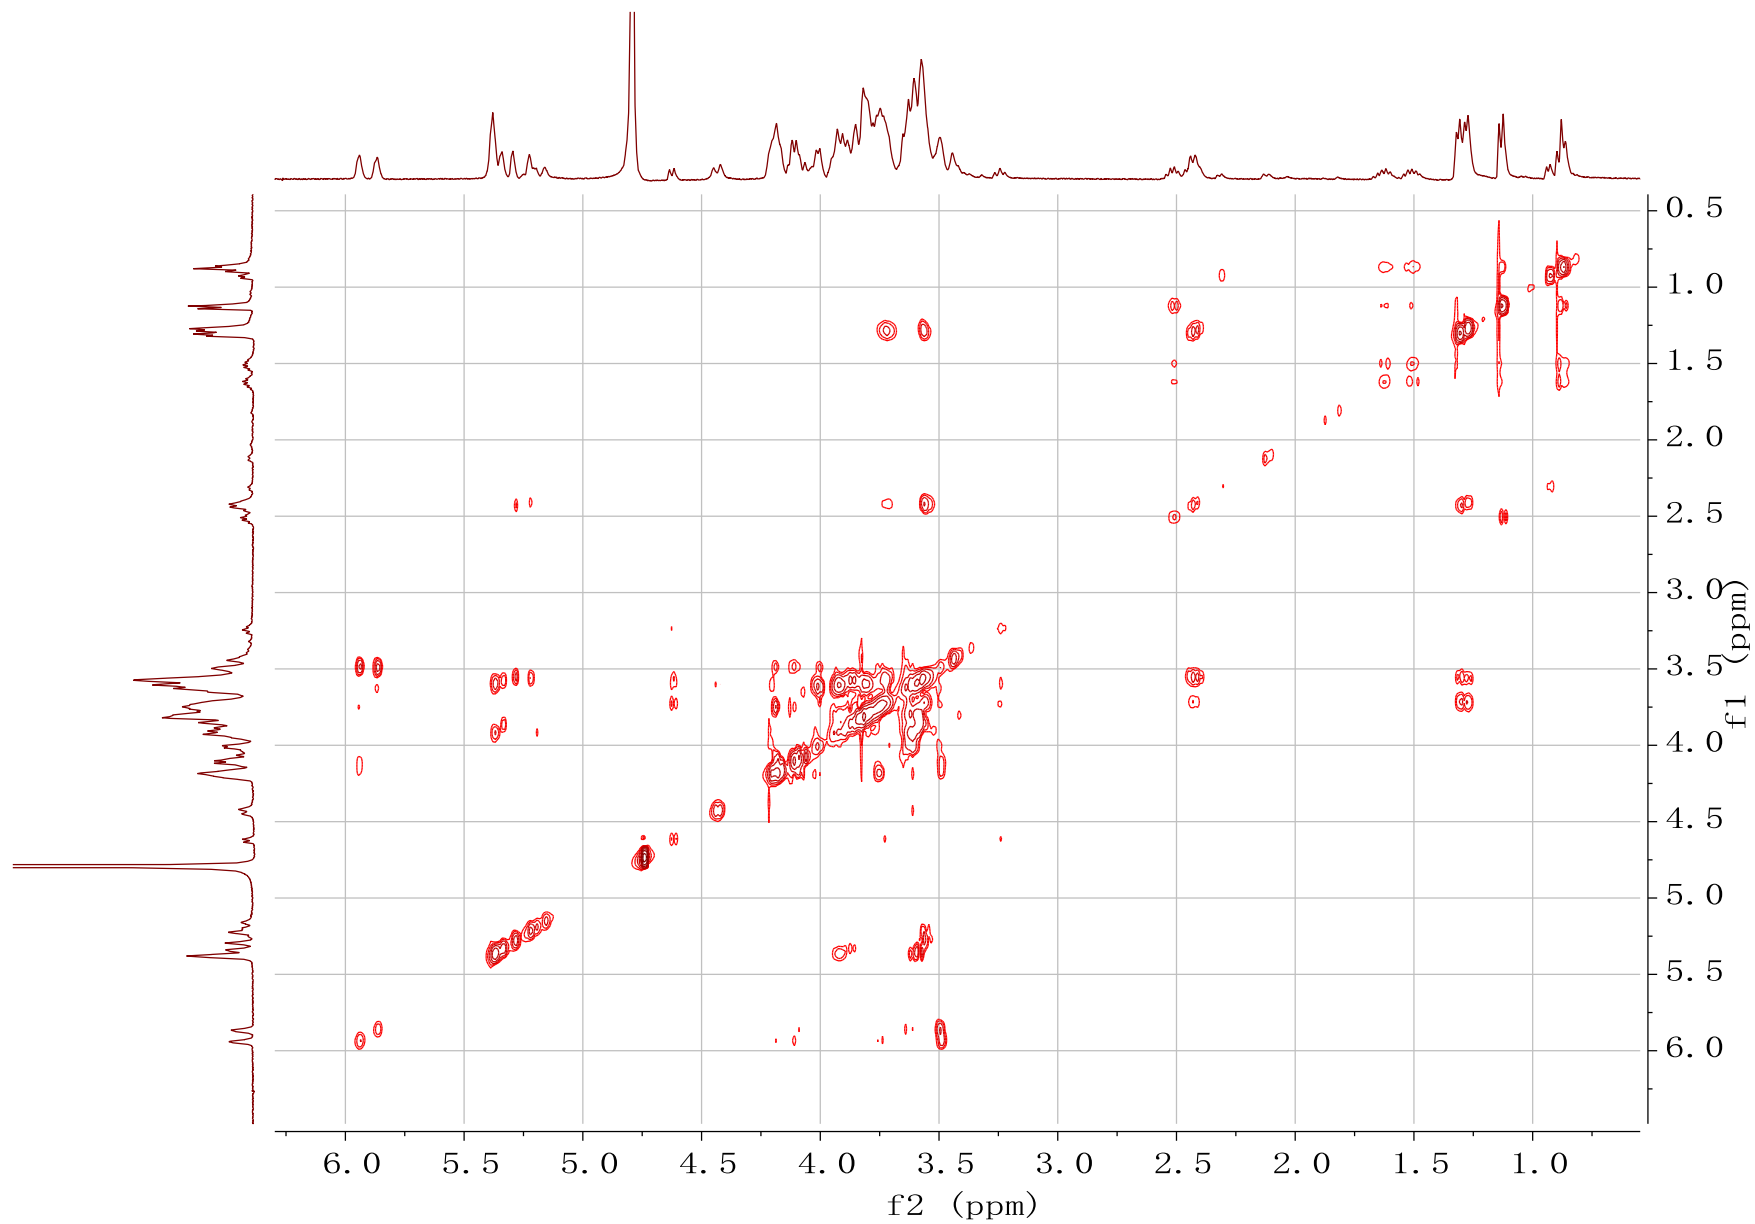

**Figure S148.** 2D-TOCSY spectrum of compound **16** (500 MHz, D<sub>2</sub>O).

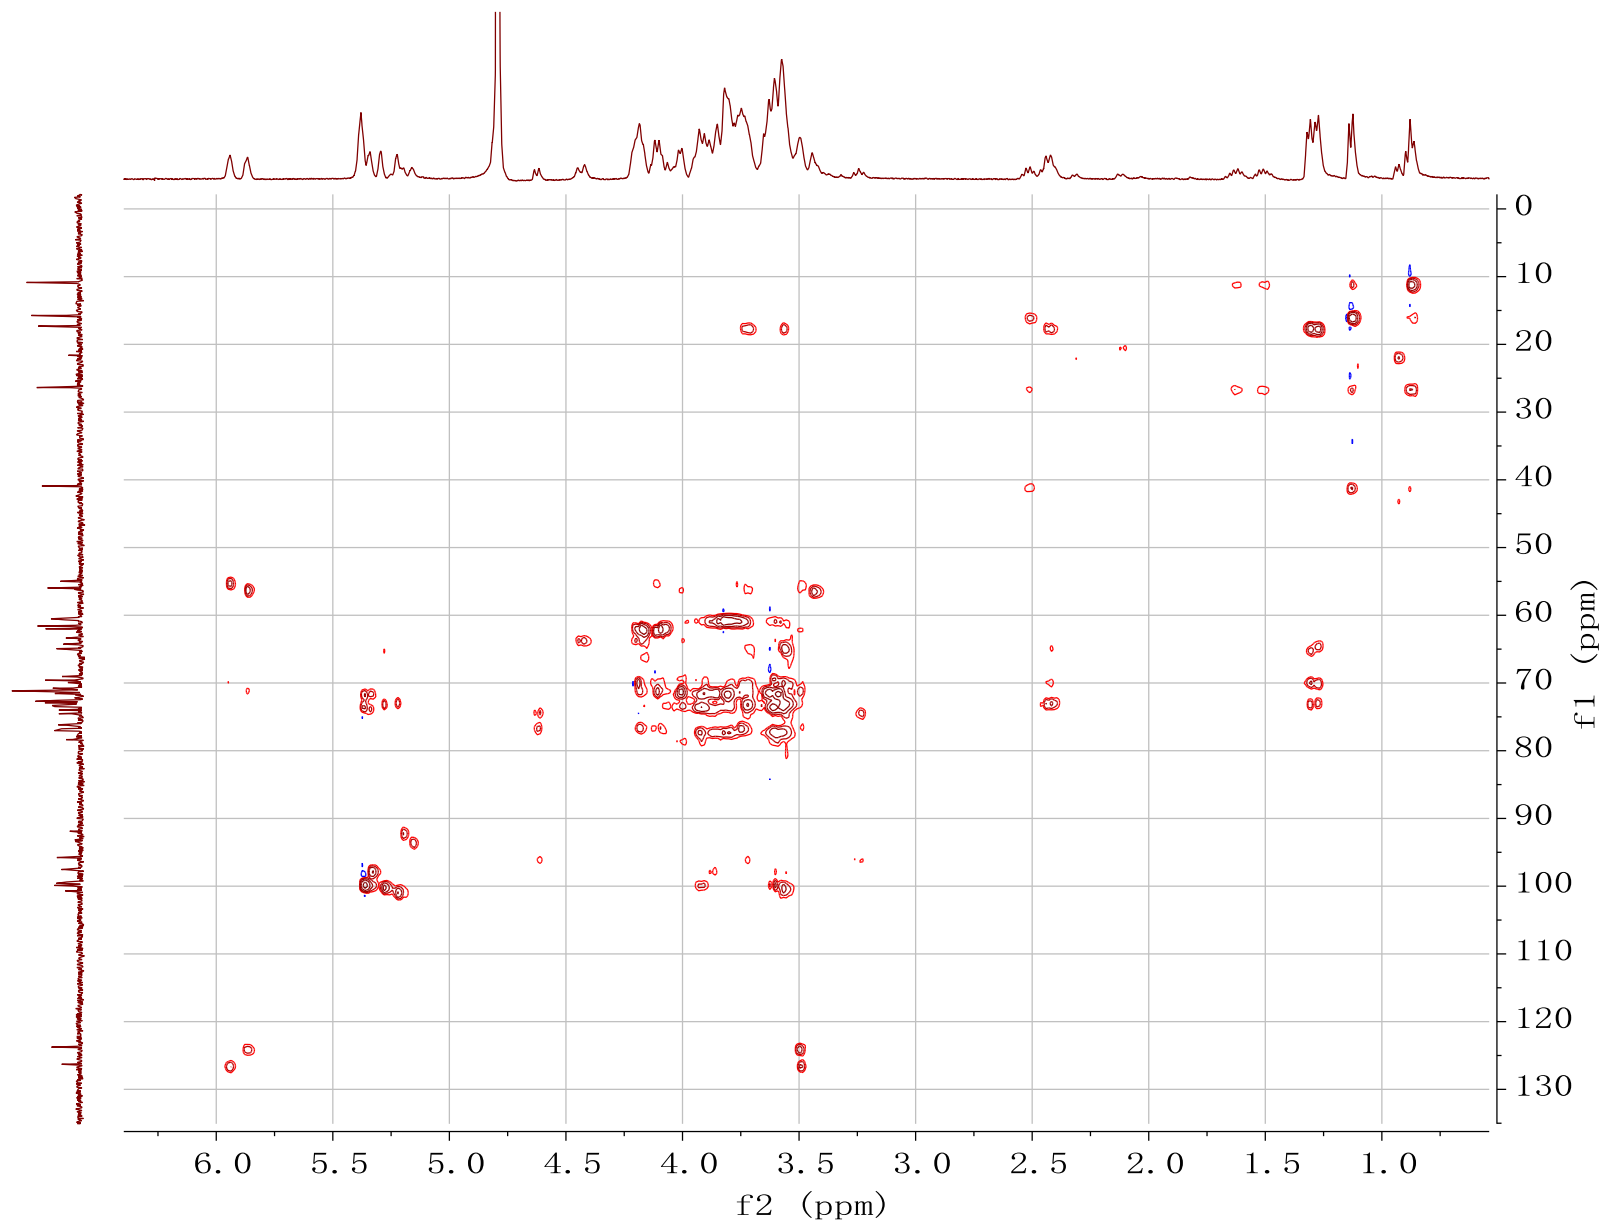

**Figure S149.** HSQC-TOCSY spectrum of compound **16** (500 MHz, D<sub>2</sub>O).



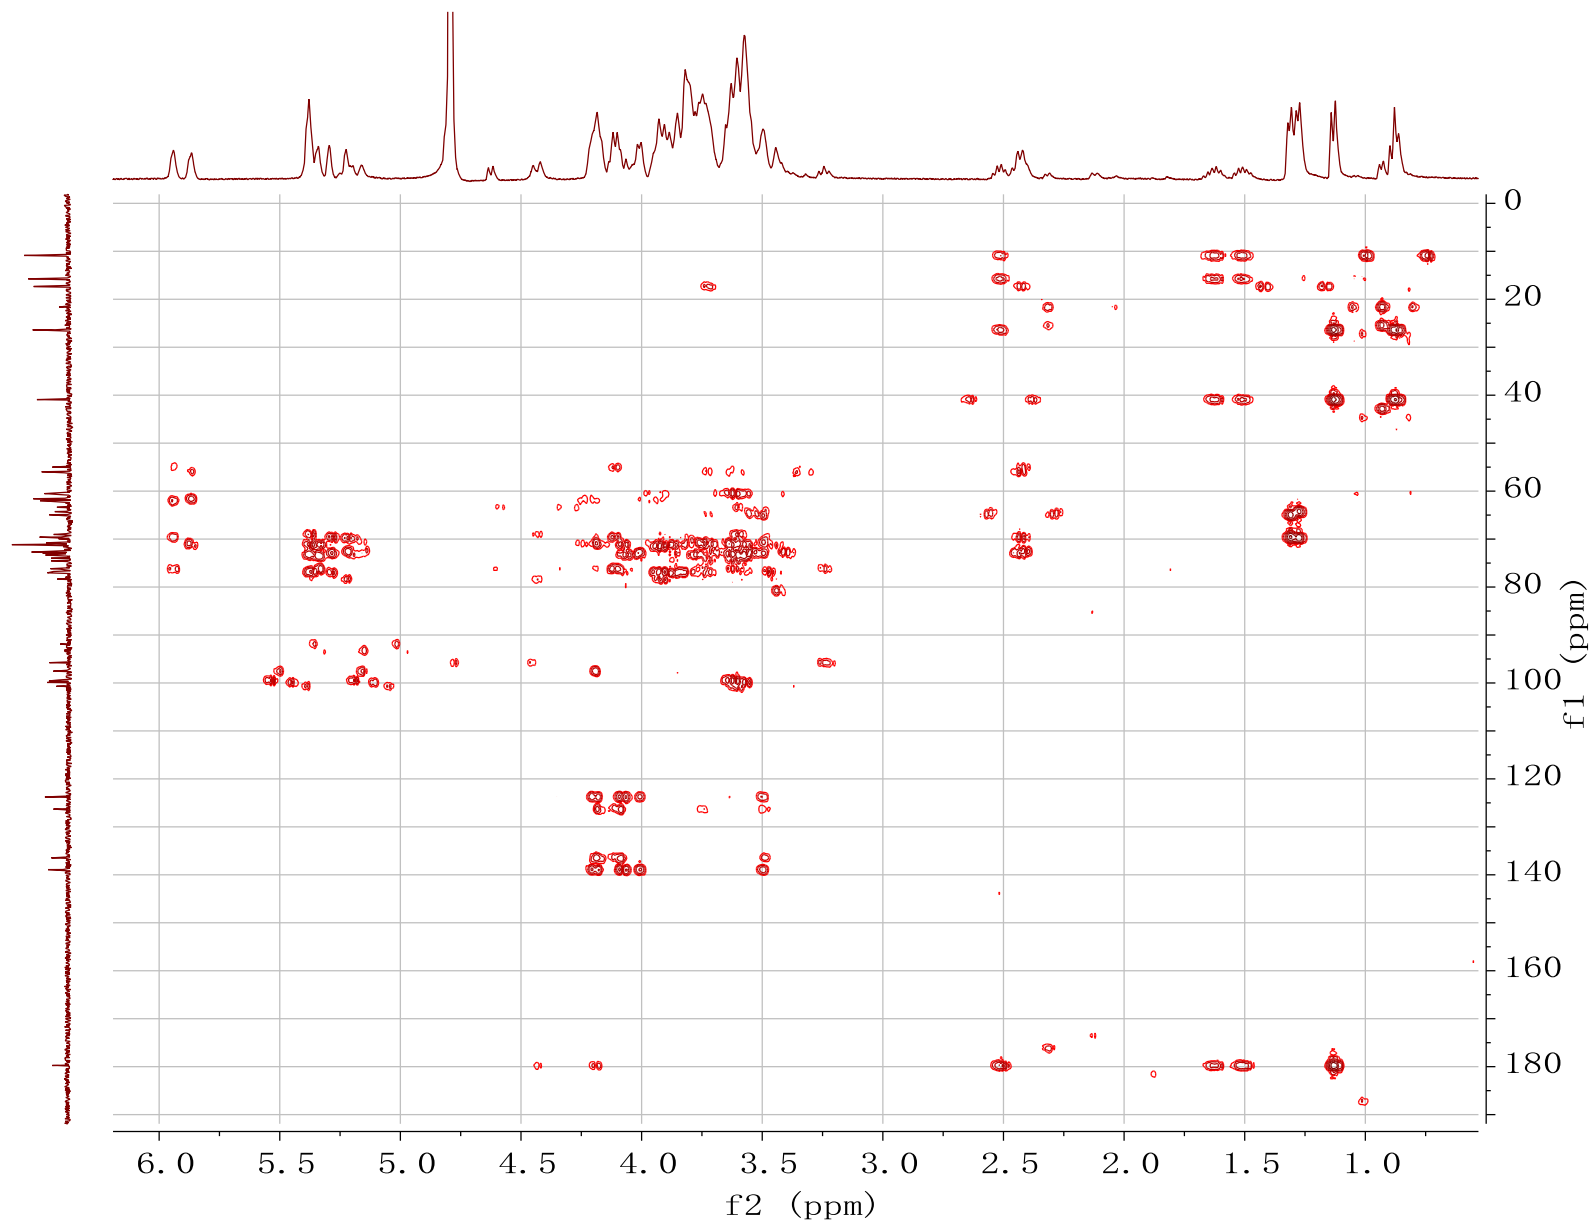

**Figure S150.** HMBC spectrum of compound **16** (500 MHz,  $D_2O$ ).

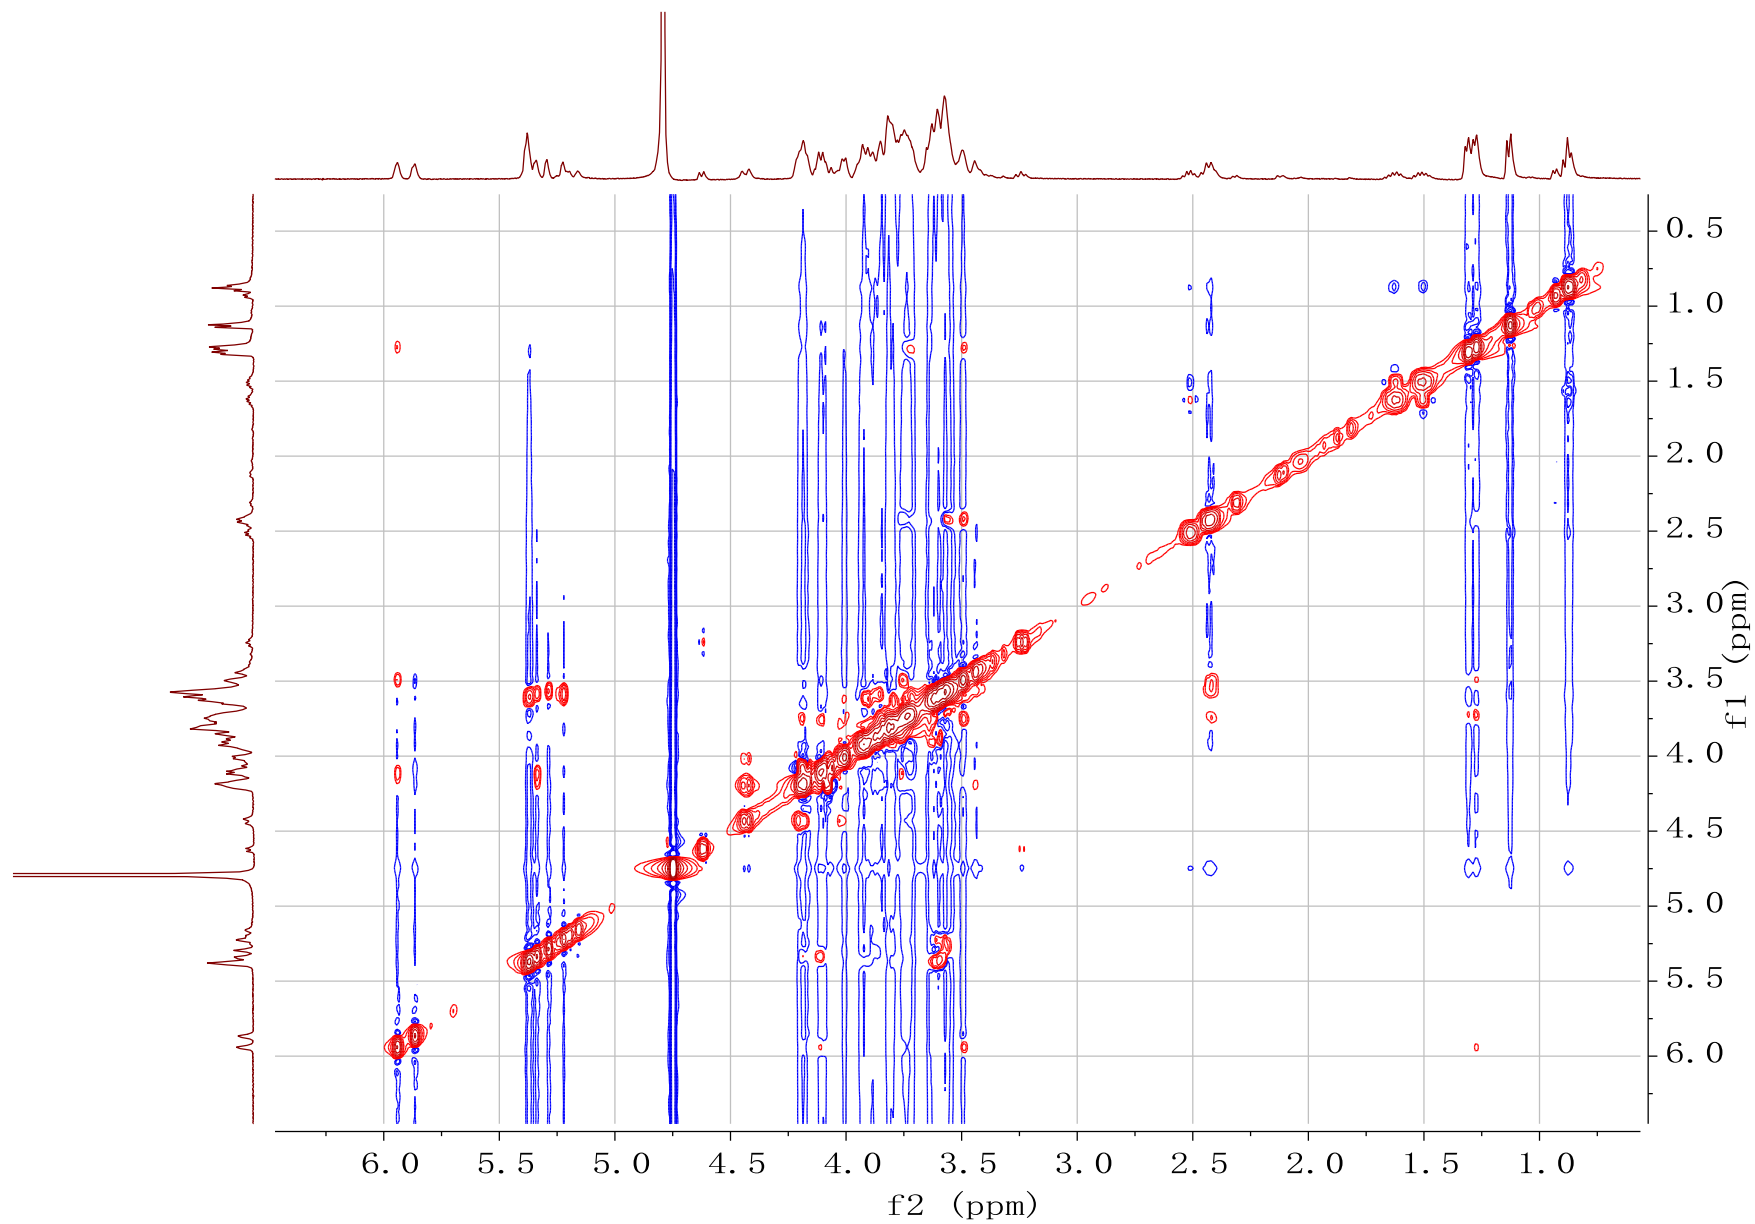

**Figure S151.** NOESY spectrum of compound **16** (500 MHz, D<sub>2</sub>O).

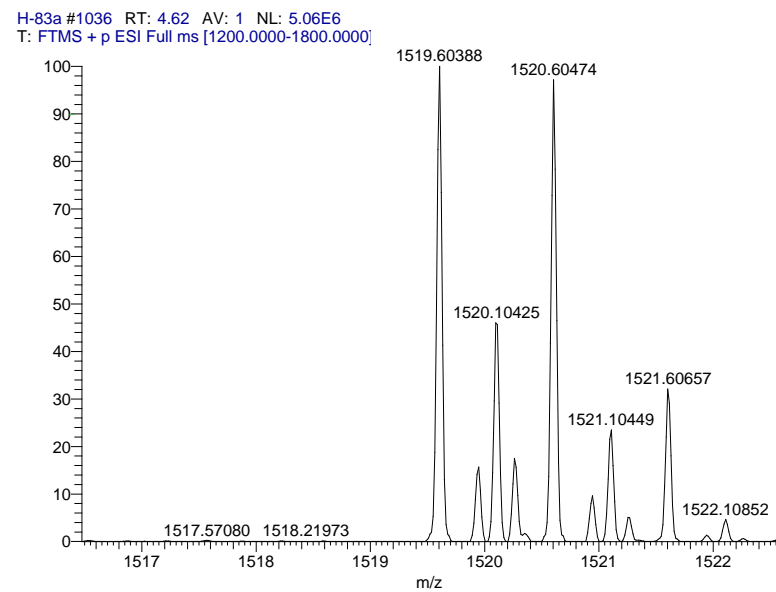

**Figure S152.** HRESIMS spectrum of compound **16**.

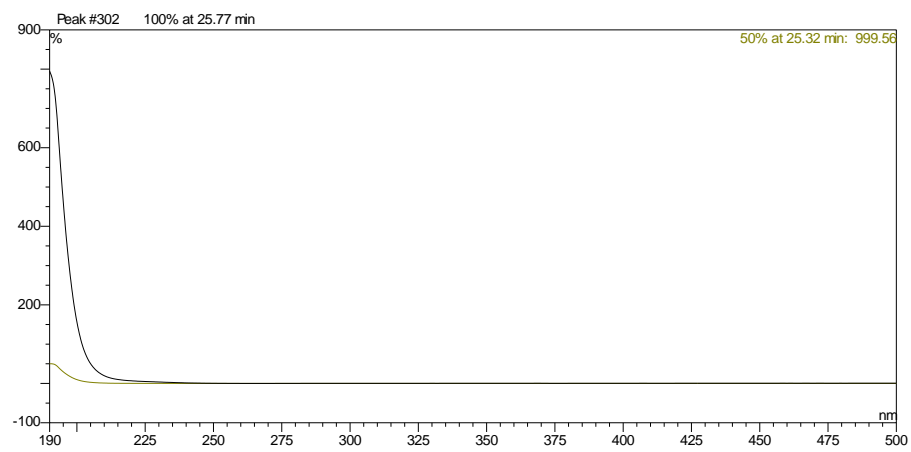

**Figure S153.** UV spectrum of compound **16**.

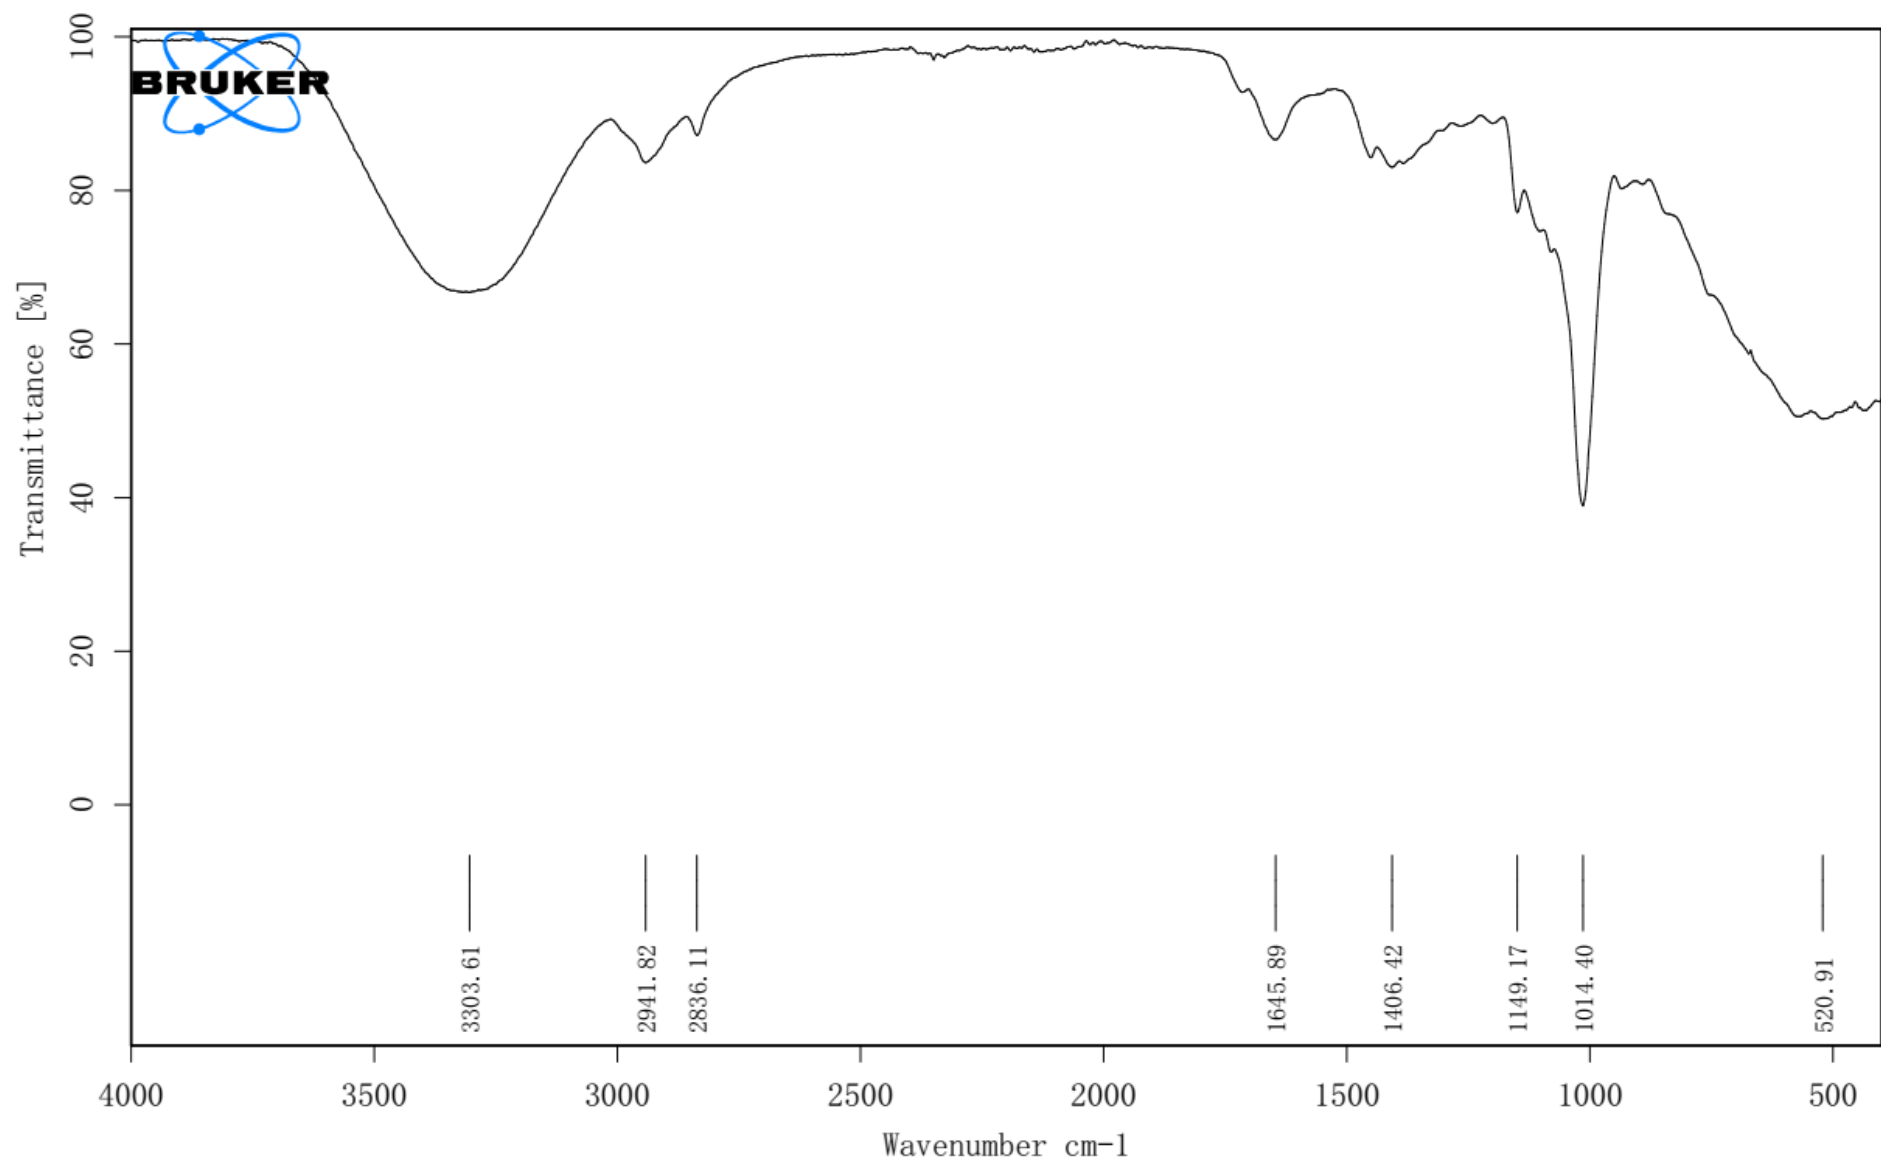

**Figure S154.** IR spectrum of compound **16**.
